# Supplementary material for: Murine Neonatal Oxidant Lung Injury: NRF2-Dependent Predisposition to Adulthood Respiratory Viral Infection and Protection by Maternal Antioxidant
Source: MDPI journal article supplement (doi:10.3390/antiox10121874), 2021-11-24
Supplement: s1 [file s1]

**Table S1. Prenatal sulforaphane-altered lung genes in Nrf2<sup>-/-</sup> mice (n=523, moderated T-Test, P<=0.01)**

RIKEN cDNA and predicted genes excluded. Fold Change (FC): Blue (-) - fold lower in SFN than PBS, Red - fold higher in SFN than PBS.

| [ICR, Air, PBS] | [ICR, Air, SFN] | [ICR, O2, PBS] | [ICR, O2, SFN] | RefSeq Transcript ID p      | FC Air-PBS:Air-SFN | Gene Symbol                               | Gene Title                                                                                            | Gene Ontology                                                                                       |
|-----------------|-----------------|----------------|----------------|-----------------------------|--------------------|-------------------------------------------|-------------------------------------------------------------------------------------------------------|-----------------------------------------------------------------------------------------------------|
| 31.70388        | 211.04439       | 139.37938      | 102.874115     | NM_008318// <i>XXM_c</i>    | 0.003              | <b>6.85</b> <i>Ibsp</i>                   | integrin binding sialoprotein                                                                         | 0001503 // ossification // inferred from electronic annotation//0001649 // osteoblast differentiati |
| 85.06954        | 466.24686       | 82.19377       | 71.79115       | NM_007802// <i>XXM_c</i>    | 0.007              | <b>5.31</b> <i>Ctsk</i>                   | cathepsin K                                                                                           | 0001957 // intramembranous ossification // inferred from electronic annotation//0006508 // prot     |
| 95.98294        | 120.96214       | 65.48201       | 124.95033      | NM_019496                   | 0.004              | <b>2.18</b> <i>Annmcrc1</i>               | Alport syndrome, mental retardation, midface hypoplasia and elliptocytosis chromosomal region gene 1  | 0005515 // protein binding // inferred from electronic annotation                                   |
| 46.458015       | 95.48914        | 56.458         | 47.88668       | NM_054084// <i>XXM_c</i>    | 0.005              | <b>2.07</b> <i>Calcb</i>                  | caltonin-related peptidase, beta                                                                      | 0042311 // vasodilation // inferred from electronic annotation                                      |
| 140.88501       | 306.8137        | 464.6552       | 672.98926      | NM_001291892// <i>XXM_c</i> | 0.000              | <b>2.05</b> <i>Gp49a//Lilrb4</i>          | glycoprotein 49 A//leukocyte immunoglobulin-like receptor, subfamily B, member 4                      | 0002376 // immune system process // inferred from electronic annotation                             |
| 75.313576       | 154.99268       | 101.2082       | 145.34927      | NR_002870// <i>NR_02</i>    | 0.007              | <b>2.01</b> <i>Dnm3os//Mir214</i>         | dynamins 3, opposite strand//microRNA 214                                                             | 0001501 // skeletal system development // inferred from mutant phenotype//0003323 // type B f       |
| 53.794945       | 95.00381        | 121.75727      | 125.865616     | NM_144783                   | 0.001              | <b>1.79</b> <i>Wt1</i>                    | Wilms tumor 1 homolog                                                                                 | 0001222 // negative regulation of transcription from RNA polymerase II promoter // not recorded,    |
| 121.42094       | 227.32707       | 274.37772      | 248.9197       | NM_001081287// <i>XXM_c</i> | 0.008              | <b>1.77</b> <i>Mpp7</i>                   | membrane protein, palmitoylated 7 (MAGUK p55 subfamily member 7)                                      | 0001334 // positive regulation of protein complex assembly // not recorded//0070830 // tight jun    |
| 794.10046       | 1420.3386       | 1273.9543      | 1594.5337      | NM_009778                   | 0.002              | <b>1.74</b> <i>C3</i>                     | complement component 3                                                                                | 0001798 // positive regulation of type IIa hypersensitivity // inferred from mutant phenotype//000  |
| 60.04707        | 104.37409       | 127.874115     | 56.07898       | NM_177595                   | 0.002              | <b>1.74</b> <i>Mkx</i>                    | mohawk homeobox                                                                                       | 0001222 // negative regulation of transcription from RNA polymerase II promoter // inferred from    |
| 109.92215       | 196.53908       | 159.87926      | 241.24054      | NM_001081342// <i>XXM_c</i> | 0.008              | <b>1.72</b> <i>Gpr133</i>                 | G protein-coupled receptor 133                                                                        | 0007166 // cell surface receptor signaling pathway // inferred from electronic annotation//000718   |
| 43.92867        | 72.22747        | 69.90488       | 143.80573      | NM_010111// <i>XXM_c</i>    | 0.000              | <b>1.69</b> <i>Egr2</i>                   | early growth response 2                                                                               | 0006351 // transcription, DNA-templated // inferred from electronic annotation//0006355 // regu     |
| 51.605183       | 85.341324       | 38.49855       | 69.14183       | NM_001112798// <i>XXM_c</i> | 0.004              | <b>1.69</b> <i>Slc8a1</i>                 | solute carrier family 8 (sodium/calcium exchanger), member 1                                          | 0001666 // response to hypoxia // not recorded//0001892 // embryonic placenta development //        |
| 70.13851        | 120.759285      | 70.42109       | 71.732956      | NM_013549// <i>XXM_c</i>    | 0.001              | <b>1.69</b> <i>Hist2h2aa1//Hist2h2aa2</i> | histone cluster 2, H2aa1//histone cluster 2, H2aa2                                                    | 0006334 // nucleosome assembly // inferred from electronic annotation//0006334 // nucleosome        |
| 519.179         | 912.1046        | 993.2537       | 1059.4312      | NM_001099634// <i>XXM_c</i> | 0.001              | <b>1.69</b> <i>Myof</i>                   | myoferlin                                                                                             | 0001778 // plasma membrane repair // inferred from mutant phenotype//0006906 // vesicle fusic       |
| 24.761656       | 38.52286        | 28.732605      | 40.1172        | NM_001164493                | 0.001              | <b>1.67</b> <i>Klhl29</i>                 | kelch-like 29                                                                                         | 0005515 // protein binding // inferred from electronic annotation                                   |
| 28.037014       | 43.627186       | 13.981073      | 24.802511      | NM_001271019// <i>XXM_c</i> | 0.002              | <b>1.66</b> <i>Siglec5</i>                | sialic acid binding Ig-like lectin 5                                                                  | 0007155 // cell adhesion // inferred from electronic annotation                                     |
| 61.26334        | 101.78379       | 89.497955      | 107.2649       | NM_133350// <i>XXM_c</i>    | 0.001              | <b>1.66</b> <i>Moprc3</i>                 | microtubule-associated protein, RP/EB family, member 3                                                | 0007049 // cell cycle // inferred from electronic annotation//0007067 // mitotic nuclear division / |
| 17.816998       | 27.668245       | 19.271816      | 33.47256       | NM_001081221// <i>XXM_c</i> | 0.003              | <b>1.65</b> <i>Erc6</i>                   | excision repair cross-complementing rodent repair deficiency, complementation group 6                 | 0003033 // response to superoxide // inferred from mutant phenotype//0006200 // ATP catabolic       |
| 339.01733       | 580.95264       | 391.6923       | 666.7519       | NM_027707// <i>XXM_c</i>    | 0.004              | <b>1.64</b> <i>Nipbl</i>                  | Nipped-B homolog (Drosophila)                                                                         | 0001222 // negative regulation of transcription from RNA polymerase II promoter // not recorded,    |
| 50.261966       | 79.81739        | 67.7412        | 78.21371       | NM_001033820// <i>XXM_c</i> | 0.008              | <b>1.63</b> <i>Zfp551</i>                 | zinc finger protein 551                                                                               | 0006355 // regulation of transcription, DNA-templated // inferred from electronic annotation        |
| 75.56271        | 124.41099       | 152.30849      | 150.44853      | NM_007562                   | 0.002              | <b>1.62</b> <i>Bnc1</i>                   | basonuclin 1                                                                                          | 0006351 // transcription, DNA-templated // inferred from electronic annotation//0006355 // regu     |
| 20.405077       | 30.765308       | 14.209172      | 25.667747      | NM_001164785// <i>XXM_c</i> | 0.001              | <b>1.62</b> <i>Adamts20</i>               | a disintegrin-like and metalloproteinase (reprolysin type) with thrombospondin type 1 motif, 20       | 0006508 // proteolysis // inferred from direct assay//0007229 // integrin-mediated signaling path   |
| 234.03123       | 397.14606       | 314.74744      | 394.0639       | NM_030206                   | 0.002              | <b>1.62</b> <i>Cygb</i>                   | cytoglobin                                                                                            | 0006810 // transport // inferred from electronic annotation//0006979 // response to oxidative str   |
| 52.2494         | 81.80647        | 259.31113      | 247.28572      | NM_009704                   | 0.006              | <b>1.60</b> <i>Areg</i>                   | amphiregulin                                                                                          | 0007173 // epidermal growth factor receptor signaling pathway // not recorded//0007186 // G-pr      |
| 125.02729       | 208.29207       | 171.68842      | 333.72653      | NM_175406                   | 0.003              | <b>1.59</b> <i>Atp6v0d2</i>               | ATPase, H <sup>+</sup> -transporting, lysosomal V0 subunit D2                                         | 0006810 // transport // inferred from electronic annotation//0006811 // ion transport // inferred   |
| 1158.877        | 1873.5059       | 1495.2028      | 1955.8738      | NM_001025387// <i>XXM_c</i> | 0.002              | <b>1.59</b> <i>Brd2</i>                   | bromodomain containing 2                                                                              | 0006810 // transport // inferred from electronic annotation//0006811 // ion transport // inferred   |
| 107.42899       | 176.12843       | 235.57437      | 467.25763      | NM_001281929// <i>XXM_c</i> | 0.005              | <b>1.57</b> <i>Gria3</i>                  | glutamate receptor, ionotropic, AMPA3 (alpha 3)                                                       | 0006200 // ATP catabolic process // inferred from electronic annotation//0006325 // chromatin o     |
| 53.70051        | 83.161995       | 52.959114      | 67.9727        | NM_001033371// <i>XXM_c</i> | 0.008              | <b>1.57</b> <i>Lrrc36</i>                 | leucine rich repeat containing 36                                                                     | 0003676 // nucleic acid binding // inferred from electronic annotation//0005515 // protein bindin   |
| 262.46674       | 431.30695       | 211.01021      | 359.76227      | NM_001110843// <i>XXM_c</i> | 0.005              | <b>1.56</b> <i>Cacna2d1</i>               | calcium channel, voltage-dependent, alpha2/delta subunit 1                                            | 0001666 // response to hypoxia // not recorded//0006081 // cellular aldehyde metabolic process,     |
| 35.89475        | 73.72552        | 60.431572      | 51.67067       | NM_010408// <i>XXM_c</i>    | 0.007              | <b>1.56</b> <i>Hcn1</i>                   | hyperpolarization-activated, cyclic nucleotide-gated K <sup>+</sup> 1                                 | 0002027 // regulation of heart rate // inferred from mutant phenotype//0006351 // transcription,    |
| 663.3817        | 1061.6375       | 529.50555      | 865.80786      | NM_145979// <i>XXM_c</i>    | 0.008              | <b>1.55</b> <i>Chd4</i>                   | chromodomain helicase DNA binding protein 4                                                           | 0001525 // angiogenesis // inferred from electronic annotation//0001550 // ovarian cumulus exps     |
| 84.82471        | 132.87904       | 99.08483       | 89.56542       | NM_198886// <i>XXM_c</i>    | 0.009              | <b>1.53</b> <i>Zbtb12</i>                 | zinc finger and BTB domain containing 12                                                              | 0031581 // hemidesmosome assembly // inferred from sequence or structural similarity//0003158       |
| 35.902283       | 52.35833        | 35.146736      | 43.93301       | NM_001112725// <i>XXM_c</i> | 0.001              | <b>1.53</b> <i>Aldh3a1</i>                | aldehyde dehydrogenase family 3, subfamily A1                                                         | 0006810 // transport // inferred from electronic annotation//0006811 // ion transport // inferred   |
| 663.62335       | 1053.6553       | 966.693        | 1393.5911      | NM_018826                   | 0.004              | <b>1.53</b> <i>Irx5</i>                   | Iroquois related homeobox 5 (Drosophila)                                                              | 0006810 // transport // inferred from electronic annotation//0006811 // ion transport // inferred   |
| 21.249775       | 30.12115        | 66.71911       | 94.42819       | NM_007950                   | 0.004              | <b>1.52</b> <i>Ereg</i>                   | epiregulin                                                                                            | 0006897 // endocytosis // inferred from electronic annotation                                       |
| 31.079636       | 44.432465       | 28.631624      | 20.66898       | NM_001290825// <i>XXM_c</i> | 0.000              | <b>1.52</b> <i>Col17a1</i>                | collagen, type XVII, alpha 1                                                                          | 0046872 // metal ion binding // inferred from electronic annotation                                 |
| 51.396664       | 75.82202        | 73.33496       | 125.07883      | NM_013825                   | 0.003              | <b>1.51</b> <i>Ly75</i>                   | lymphocyte antigen 75                                                                                 | 0001558 // regulation of cell growth // inferred from genetic interaction//0001649 // osteoblast d  |
| 24.25811        | 33.944386       | 30.495024      | 36.866108      | NM_027425// <i>XXM_c</i>    | 0.004              | <b>1.51</b> <i>Rufy2</i>                  | RUN and FYVE domain-containing 2                                                                      | 0016020 // membrane // inferred from electronic annotation//0016021 // integral component of        |
| 1153.3927       | 1767.9536       | 1137.417       | 1414.4901      | NM_010518                   | 0.004              | <b>1.49</b> <i>Igf1bp5</i>                | insulin-like growth factor binding protein 5                                                          | 0016020 // membrane // inferred from electronic annotation//0016021 // integral component of        |
| 290.9779        | 454.98215       | 355.3063       | 526.86945      | NM_001033155// <i>XXM_c</i> | 0.003              | <b>1.49</b> <i>1110018F16Rik//Dnajb1</i>  | RIKEN cDNA 1110018F16 gene//DnaJ (Hsp40) homolog, subfamily B, member 14                              | 0006614 // SRP-dependent cotranslational protein targeting to membrane // inferred from electroi    |
| 33.810482       | 47.470654       | 38.702503      | 32.906536      | NM_029360                   | 0.001              | <b>1.49</b> <i>Tms4f5</i>                 | transmembrane 4 superfamily member 5                                                                  | 0006810 // transport // inferred from electronic annotation//0006811 // ion transport // inferred   |
| 535.4431        | 832.6205        | 311.0486       | 563.9149       | NM_172471// <i>XXM_c</i>    | 0.009              | <b>1.49</b> <i>Itih5</i>                  | inter-alpha (globulin) inhibitor H5                                                                   | 0045600 // positive regulation of fat cell differentiation // inferred from mutant phenotype        |
| 122.8398        | 190.98245       | 185.37529      | 149.05247      | NM_021719                   | 0.005              | <b>1.48</b> <i>Cldn15</i>                 | claudin 15                                                                                            | 0001332 // establishment of mitotic spindle orientation // inferred from genetic interaction//0001  |
| 19.760483       | 27.25687        | 23.63514       | 21.806305      | NR_040389                   | 0.004              | <b>1.48</b> <i>Gm10785</i>                | predicted gene 10785                                                                                  | 0002376 // immune system process // inferred from electronic annotation//0009615 // response 1      |
| 51.851913       | 74.192406       | 75.76936       | 96.692184      | NM_027519// <i>XXM_c</i>    | 0.010              | <b>1.47</b> <i>Medog</i>                  | mesenteric estrogen dependent adipogenesis                                                            | 0002376 // immune system process // inferred from electronic annotation//0006164 // purine nu       |
| 1821.1898       | 2690.7188       | 2351.985       | 2372.9458      | NM_011896// <i>XXM_c</i>    | 0.003              | <b>1.46</b> <i>Spry1</i>                  | sprouty homolog 1 (Drosophila)                                                                        | 0009749 // response to glucose // inferred from mutant phenotype//0003073 // insulin secretion      |
| 99.25308        | 150.39975       | 162.50865      | 308.29987      | NM_008331                   | 0.003              | <b>1.46</b> <i>Ifit1</i>                  | interferon-induced protein with tetratricopeptide repeats 1                                           | 0006351 // transcription, DNA-templated // inferred from electronic annotation//0006355 // regu     |
| 93.340866       | 140.65144       | 101.4492       | 182.96014      | NM_011854// <i>XXM_c</i>    | 0.008              | <b>1.46</b> <i>Oas2</i>                   | 2'-5' oligoadenylate synthetase-like 2                                                                | 0001702 // gastrulation with mouth forming second // inferred from genetic interaction//0001944     |
| 108.7908        | 164.34299       | 176.71744      | 205.29285      | NM_001164528// <i>XXM_c</i> | 0.004              | <b>1.45</b> <i>Ildr2</i>                  | immunoglobulin-like domain containing receptor 2                                                      | 0006468 // protein phosphorylation // not recorded//0006954 // inflammatory response // inferri     |
| 115.71432       | 176.6755        | 192.81125      | 243.64786      | NM_001081678// <i>XXM_c</i> | 0.010              | <b>1.45</b> <i>Zfp800</i>                 | zinc finger protein 800                                                                               | 0045747 // positive regulation of Notch signaling pathway // not recorded//0051604 // protein m     |
| 73.61993        | 106.82851       | 97.119835      | 129.07304      | NR_033228                   | 0.002              | <b>1.44</b> <i>E030024N20Rik</i>          | peptidylprolyl isomerase A pseudogene 8                                                               | 0001501 // skeletal system development // inferred from mutant phenotype//0001649 // osteobi        |
| 55.95613        | 79.1136         | 63.943695      | 60.61627       | NM_008513// <i>XXR_3i</i>   | 0.003              | <b>1.44</b> <i>Lrp5</i>                   | low density lipoprotein receptor-related protein 5                                                    | 0007049 // cell cycle // inferred from electronic annotation//0007059 // chromosome segregati       |
| 96.959724       | 144.30843       | 102.93956      | 131.93976      | NM_001290374// <i>XXM_c</i> | 0.003              | <b>1.44</b> <i>Camk1d</i>                 | calcium/calmodulin-dependent protein kinase 1D//Mus musculus calcium/calmodulin-dependent protein kin | 0006479 // protein methylation // not recorded//0006555 // methionine metabolic process // not      |
| 240.132         | 364.36948       | 373.0754       | 511.6522       | NM_019571// <i>NR_1</i>     | 0.001              | <b>1.44</b> <i>Tspan5</i>                 | tetraspanin 5                                                                                         | 0006397 // mRNA processing // inferred from electronic annotation//0006417 // regulation of tra     |
| 58.78554        | 82.877174       | 79.60454       | 80.72896       | NM_001145920// <i>XXM_c</i> | 0.007              | <b>1.44</b> <i>Runx2</i>                  | runx related transcription factor 2                                                                   | 0007249 // l-kappaB kinase/NF-kappaB signaling // not recorded//0007249 // l-kappaB kinase/NF-      |
| 128.53464       | 193.86139       | 74.97245       | 108.28588      | NM_029617// <i>XXM_c</i>    | 0.003              | <b>1.44</b> <i>Casc5</i>                  | cancer susceptibility candidate 5                                                                     | 0001701 // in utero embryonic development // inferred from genetic interaction//0006351 // tran     |
| 108.6009        | 162.08821       | 148.47493      | 120.50201      | NM_001081128// <i>XXM_c</i> | 0.002              | <b>1.43</b> <i>Mtr</i>                    | 5-methyltetrahydrofolate-homocysteine methyltransferase                                               | 0001889 // liver development // not recorded//0006810 // transport // inferred from electronic a    |
| 20.343548       | 27.066057       | 26.439373      | 34.410282      | NM_001252525// <i>XXM_c</i> | 0.002              | <b>1.43</b> <i>Cpeb1</i>                  | cytoplasmic polyadenylation element binding protein 1                                                 | 0001556 // oocyte maturation // inferred from direct assay//0001556 // oocyte maturation // infe    |
| 33.69915        | 45.400394       | 22.629398      | 34.614645      | NM_001081280// <i>XXM_c</i> | 0.005              | <b>1.42</b> <i>Nlr3</i>                   | NLR family, CARD domain containing 3                                                                  | 0001666 // response to hypoxia // inferred from mutant phenotype//0001764 // neuron migrati         |
| 230.39433       | 343.12134       | 466.976        | 559.3078       | NM_010755// <i>XXM_c</i>    | 0.005              | <b>1.41</b> <i>Moif</i>                   | v-maf musculoaponeurotic fibrosarcoma oncogene family, protein F (avian)                              | 0030225 // macrophage differentiation // inferred from direct assay                                 |
| 1920.3824       | 2765.61         | 2477.2646      | 3721.227       | NM_010515                   | 0.006              | <b>1.41</b> <i>Igf2r</i>                  | insulin-like growth factor 2 receptor                                                                 | 0007173 // epidermal growth factor receptor signaling pathway // not recorded//0008284 // posi      |
| 498.26935       | 732.86304       | 308.37607      | 466.8467       | NM_025995                   | 0.009              | <b>1.41</b> <i>Fbxo5</i>                  | F-box protein 5                                                                                       | 0001843 // neural tube closure // inferred from mutant phenotype//0016567 // protein ubiquitin      |
| 110.15724       | 160.86676       | 88.89565       | 112.38599      | NM_001139509// <i>XXM_c</i> | 0.003              | <b>1.41</b> <i>Nr4a2</i>                  | nuclear receptor subfamily 4, group A, member 2                                                       | 0001656 // metanephros development // inferred from expression pattern//0006355 // regulator        |
| 67.21004        | 93.98363        | 74.082115      | 79.895386      | NM_181584                   | 0.001              | <b>1.40</b> <i>Gab3</i>                   | growth factor receptor bound protein 2-associated protein 3                                           | 0006810 // transport // inferred from electronic annotation//0006811 // ion transport // inferred   |
| 120.54283       | 176.19016       | 155.63914      | 176.87526      | NM_001033445                | 0.007              | <b>1.40</b> <i>Gareml</i>                 | GRB2 associated, regulator of MAPK1                                                                   | 0001665 // MAPK cascade // not recorded//0000165 // MAPK cascade // inferred from sequenc           |
| 18.478449       | 24.167439       | 22.991898      | 24.761549      | NR_027799                   | 0.009              | <b>1.40</b> <i>Tbrg3</i>                  | transforming growth factor beta regulated gene 3                                                      | 0007155 // cell adhesion // inferred from electronic annotation//0016337 // single organismal cell  |
| 1700.2263       | 2398.7046       | 1773.6273      | 2308.3413      | NM_144788// <i>XXM_c</i>    | 0.002              | <b>1.40</b> <i>Hectd1</i>                 | HECT domain containing 1                                                                              | 0001822 // kidney development // inferred from mutant phenotype//0016055 // Wnt signaling pa        |
| 634.7859        | 914.78436       | 806.3221       | 716.2482       | NM_010574// <i>XXM_c</i>    | 0.009              | <b>1.39</b> <i>Irx2</i>                   | Iroquois related homeobox 2 (Drosophila)                                                              | 0001570 // vasculogenesis // inferred from mutant phenotype//0001649 // osteoblast differenti       |
| 37.547443       | 48.687748       | 36.727787      | 52.63854       | NM_0008069// <i>XXM_c</i>   | 0.006              | <b>1.37</b> <i>Gabrb1</i>                 | gamma-aminobutyric acid (GABA) A receptor, subunit beta 1                                             | 0008033 // tRNA processing // inferred from electronic annotation//0032259 // methylation // inf    |
| 30.193584       | 39.033688       | 51.984455      | 73.03613       | NR_037986                   | 0.004              | <b>1.37</b> <i>Gm16880</i>                | predicted gene, 16880                                                                                 | 0001508 // action potential // inferred from mutant phenotype//0006810 // transport // inferred     |
| 26.211935       | 33.26756        | 20.40155       | 28.361856      | NM_009129// <i>XXM_c</i>    | 0.003              | <b>1.37</b> <i>Scg2</i>                   | secretogranin II                                                                                      |                                                                                                     |
| 155.71693       | 224.41743       | 301.37192      | 276.14014      | NM_007962// <i>XXM_c</i>    | 0.005              | <b>1.36</b> <i>Mpl2</i>                   | myelin protein zero-like 2                                                                            |                                                                                                     |
| 304.30743       | 431.4746        | 343.19257      | 380.7025       | NM_175179                   | 0.007              | <b>1.35</b> <i>Amer1</i>                  | APC membrane recruitment 1                                                                            |                                                                                                     |
| 29.832485       | 37.8058         | 31.621458      | 33.00762       |                             | 0.006              | <b>1.35</b> <i>D2Erd127e</i>              | DNA segment, Chr 2, ERATO Doi 127, expressed                                                          |                                                                                                     |
| 176.1112        | 247.93913       | 411.68637      | 526.9774       | NM_008416                   | 0.003              | <b>1.33</b> <i>Junb</i>                   | jun B proto-oncogene                                                                                  |                                                                                                     |
| 32.19717        | 40.597176       | 30.035881      | 34.            |                             |                    |                                           |                                                                                                       |                                                                                                     |

| [ICR, Air, PBS] | [ICR, Air, SFN] | [ICR, O2, PBS] | [ICR, O2, SFN] | [RefSeq Transcript ID p | FC Air-PBS:Air-SFN | Gene Symbol                       | Gene Title                                                                                                  | Gene Ontology                                                                                        |
|-----------------|-----------------|----------------|----------------|-------------------------|--------------------|-----------------------------------|-------------------------------------------------------------------------------------------------------------|------------------------------------------------------------------------------------------------------|
| 250.47769       | 351.10553       | 385.72855      | 523.9787       | NM_019570//XM_C         | 0.007              | <b>1.33 Rev1</b>                  | REV1 homolog (S. cerevisiae)                                                                                | 0006260 // DNA replication // inferred from electronic annotation//0006261 // DNA-dependent D        |
| 301.80273       | 418.89847       | 454.75003      | 478.62057      | NM_011150//XM_C         | 0.005              | <b>1.32 Lgals3bp</b>              | lectin, galactoside-binding, soluble, 3 binding protein                                                     | 0006898 // receptor-mediated endocytosis // inferred from sequence or structural similarity//000     |
| 204.62753       | 287.6124        | 214.9759       | 330.38858      | NM_028013//XM_C         | 0.004              | <b>1.32 Endod1</b>                | endonuclease domain containing 1                                                                            | 0008152 // metabolic process // inferred from electronic annotation//0090305 // nucleic acid pho     |
| 227.09082       | 318.25958       | 104.60873      | 192.18773      | NM_001033331//N         | 0.004              | <b>1.32 Gas2l3</b>                | growth arrest-specific 2 like 3                                                                             | 0000226 // microtubule cytoskeleton organization // not recorded//0007050 // cell cycle arrest //    |
| 44.12032        | 55.75253        | 58.89628       | 70.18821       | NM_145838//XM_C         | 0.005              | <b>1.32 St8sia6</b>               | ST8 alpha-N-acetyl-neuraminidase alpha-2,8-sialyltransferase 6                                              | 0001574 // ganglioside biosynthetic process // inferred from direct assay//0006486 // protein glyco  |
| 763.9995        | 1039.4465       | 821.5112       | 980.9611       | NM_001001602//N         | 0.010              | <b>1.32 Dab2ip</b>                | disabled 2 interacting protein                                                                              | 0000122 // negative regulation of transcription from RNA polymerase II promoter // not recorded//    |
| 151.4919        | 210.18614       | 245.40456      | 208.30515      | NM_001083903//N         | 0.007              | <b>1.32 Sbsn</b>                  | suprabasin                                                                                                  | 0005576 // extracellular region // inferred from electronic annotation//0005737 // cytoplasm // i    |
| 163.18095       | 227.16814       | 176.77748      | 175.95743      | NM_026551//XM_C         | 0.004              | <b>1.32 Dcokd</b>                 | dephospho-CoA kinase domain containing                                                                      | 0015937 // coenzyme A biosynthetic process // inferred from electronic annotation//0016310 // p      |
| 27.693193       | 34.011208       | 14.233391      | 19.101377      | NR_024720               | 0.006              | <b>1.31 2700099C18rik</b>         | NDC80 homolog, kinetochore complex component pseudogene                                                     |                                                                                                      |
| 334.70303       | 459.27002       | 367.51053      | 524.10925      | NM_127771//XM_C         | 0.007              | <b>1.31 Dmxl2</b>                 | Dmx-like 2                                                                                                  | 0005515 // protein binding // inferred from electronic annotation//0017137 // Rab GTPase bindin      |
| 196.89948       | 272.05154       | 185.8761       | 346.56134      | NM_001170853//XI        | 0.009              | <b>1.31 Mndol//Hf204//Hf205//</b> | myeloid nuclear differentiation antigen like//interferon activated gene 204//interferon activated gene 205/ | 0030308 // negative regulation of cell growth // inferred from mutant phenotype//0035458 // cell     |
| 893.774         | 1192.8127       | 2710.3591      | 1236.5773      | NM_018857//XM_C         | 0.008              | <b>1.31 Msln</b>                  | mesothelin                                                                                                  | 0007155 // cell adhesion // inferred from electronic annotation//0031016 // pancreas developme       |
| 549.282         | 746.8871        | 615.7252       | 833.2459       | NM_153178               | 0.008              | <b>1.31 Ago2</b>                  | argonate RISC catalytic subunit 2                                                                           | 0006351 // transcription, DNA-templated // inferred from electronic annotation//0006355 // regu      |
| 213.62871       | 296.5488        | 215.08699      | 266.39948      | NM_198035               | 0.006              | <b>1.31 Zbtb39</b>                | zinc finger and BTB domain containing 39                                                                    | 0003676 // nucleic acid binding // inferred from electronic annotation//0005515 // protein bindin    |
| 160.46207       | 220.5536        | 441.01245      | 337.7131       | NM_001083894//N         | 0.008              | <b>1.30 Liph</b>                  | lipase, member H                                                                                            | 0006629 // lipid metabolic process // inferred from electronic annotation//0016042 // lipid catabo   |
| 501.0726        | 676.94775       | 485.26706      | 606.8007       | NM_001122730//N         | 0.007              | <b>1.30 Trnc18</b>                | trinucleotide repeat containing 18                                                                          | 0003677 // DNA binding // inferred from electronic annotation//0003682 // chromatin binding // i     |
| 55.226788       | 70.06314        | 70.15251       | 85.027565      | XR_105200//XR_10        | 0.010              | <b>1.30 BC035532//Gm17491</b>     | Mus musculus, clone IMAGE:5367487, mRNA,///predicted gene, 17491                                            |                                                                                                      |
| 206.10951       | 282.24988       | 240.04082      | 364.49112      | NM_029639               | 0.004              | <b>1.30 Plet1</b>                 | placenta expressed transcript 1                                                                             | 0001953 // negative regulation of cell-matrix adhesion // inferred from mutant phenotype//00301      |
| 501.13324       | 675.79376       | 576.03375      | 685.29565      | NM_001080548//N         | 0.006              | <b>1.29 Usp6nl</b>                | USP6 N-terminal like                                                                                        | 0007030 // Golgi organization // not recorded//0032313 // regulation of Rab GTPase activity // inf   |
| 96.074905       | 126.52572       | 159.44437      | 143.65504      | NM_001177752//N         | 0.009              | <b>1.28 Pfkfb3</b>                | 6-phosphofructo-2-kinase/fructose-2,6-bisphosphatase 3                                                      | 0006000 // fructose metabolic process // inferred from electronic annotation//0006003 // fructos     |
| 31.6456         | 38.039135       | 33.43079       | 31.33232       | NR_045294               | 0.008              | <b>1.27 Gm4285</b>                | predicted gene 4285                                                                                         |                                                                                                      |
| 198.94254       | 396.924         | 427.09717      | 403.13385      | NM_011212//XM_C         | 0.009              | <b>1.27 Ptprc</b>                 | protein tyrosine phosphatase, receptor type, E                                                              | 0006470 // protein dephosphorylation // inferred from electronic annotation//0007185 // transm       |
| 294.51923       | 392.93863       | 367.21036      | 450.61218      | NM_001136104//N         | 0.010              | <b>1.27 Abi2</b>                  | v-abl Abelson murine leukemia viral oncogene 2 (arg, Abelson-related gene)                                  | 0006468 // protein phosphorylation // inferred from direct assay//0007015 // actin filament orga     |
| 99.18277        | 129.61693       | 88.33103       | 116.8694       | NM_145628//XM_C         | 0.009              | <b>1.27 Usp11</b>                 | ubiquitin specific peptidase 11                                                                             | 0006508 // proteolysis // not recorded//0006511 // ubiquitin-dependent protein catabolic proces      |
| 510.08077       | 593.1886        | 537.6023       | 536.623        | NM_001145813//N         | 0.006              | <b>1.27 Elf5</b>                  | E74-like factor 5                                                                                           | 0006351 // transcription, DNA-templated // inferred from electronic annotation//0006355 // regu      |
| 72.91295        | 92.655815       | 76.369606      | 76.22667       | NM_022983               | 0.009              | <b>1.27 Lpar3</b>                 | lysophosphatidic acid receptor 3                                                                            | 0000187 // activation of MAPK activity // inferred from direct assay//0007165 // signal transducti   |
| 25.381077       | 29.784544       | 24.001633      | 26.74695       | XR_378441//XR_40        | 0.008              | <b>1.26 Sox6os</b>                | SRY (sex determining region Y)-box 6, opposite strand                                                       |                                                                                                      |
| 312.76343       | 408.10086       | 488.70282      | 568.8412       | NM_010756//XM_C         | 0.010              | <b>1.25 Mdfg</b>                  | v-maf musculoaponeurotic fibrosarcoma oncogene family, protein G (avian)                                    | 0000122 // negative regulation of transcription from RNA polymerase II promoter // inferred from     |
| 176.90018       | 148.58652       | 172.05162      | 162.12796      | NM_212483//XM_C         | 0.010              | <b>-1.24 Krt42</b>                | keratin 42                                                                                                  | 0005198 // structural molecule activity // inferred from electronic annotation                       |
| 112.08529       | 91.94309        | 105.989075     | 93.89197       | NM_015808               | 0.009              | <b>-1.25 Krtap5-1</b>             | keratin associated protein 5-1                                                                              | 0005882 // intermediate filament // inferred from electronic annotation//0045095 // keratin filam    |
| 55.690758       | 42.86803        | 64.70021       | 59.89046       | NM_183087//XM_C         | 0.010              | <b>-1.25 Fam189a1</b>             | family with sequence similarity 189, member A1                                                              | 0006520 // membrane // inferred from electronic annotation//0016021 // integral component of         |
| 248.18642       | 208.43869       | 228.58908      | 211.73468      | NM_157175               | 0.009              | <b>-1.25 Plekhj2</b>              | pleckstrin homology domain containing, family F (with FYVE domain) member 2                                 | 0006810 // transport // inferred from electronic annotation//0015031 // protein transport // infer   |
| 75.543655       | 59.731426       | 70.21141       | 69.80537       | NM_001256005//N         | 0.009              | <b>-1.25 Gbp4//Gbp8</b>           | guanylate binding protein 4//guanylate-binding protein 8                                                    | 0000122 // negative regulation of transcription from RNA polymerase II promoter // inferred from     |
| 1658.202        | 1363.8546       | 1565.1398      | 1253.9458      | NM_001110831//N         | 0.008              | <b>-1.25 Dnpep</b>                | aspartyl aminopeptidase                                                                                     | 0006508 // proteolysis // inferred from electronic annotation                                        |
| 108.12305       | 88.27646        | 98.52483       | 83.57065       | NM_019506               | 0.010              | <b>-1.25 Gdf2</b>                 | growth differentiation factor 2                                                                             | 0001525 // angiogenesis // not recorded//0001569 // patterning of blood vessels // inferred from     |
| 24.755665       | 18.391495       | 23.54275       | 17.694609      | NM_008103               | 0.010              | <b>-1.25 Gcm1</b>                 | glial cells missing homolog 1 (Drosophila)                                                                  | 0006351 // transcription, DNA-templated // inferred from electronic annotation//0006355 // regu      |
| 420.97266       | 351.99164       | 243.6928       | 215.2877       | NM_025566               | 0.010              | <b>-1.26 Tnfrap8l1</b>            | tumor necrosis factor, alpha-induced protein 8-like 1                                                       |                                                                                                      |
| 94.800545       | 75.86157        | 94.42467       | 85.864525      | NM_172794//XM_C         | 0.007              | <b>-1.26 Zfp454</b>               | zinc finger protein 454                                                                                     | 0006355 // regulation of transcription, DNA-templated // not recorded                                |
| 96.67854        | 72.077896       | 79.34672       | 71.210754      | NM_026419//XR_4i        | 0.009              | <b>-1.26 Cct3b//LOC102641402</b>  | chymotrypsin-like elastase family, member 38//uncharacterized LOC102641402                                  | 0006508 // proteolysis // inferred from electronic annotation                                        |
| 576.9163        | 479.62076       | 518.05316      | 464.18796      | NM_133999               | 0.010              | <b>-1.26 Fig4</b>                 | FIG4 homolog (S. cerevisiae)                                                                                | 0007033 // vacuole organization // inferred from mutant phenotype//0007626 // locomotory behav       |
| 127.8414        | 104.62007       | 107.02186      | 99.601685      | NM_029383               | 0.010              | <b>-1.26 Cldn22</b>               | claudin 22                                                                                                  | 0016338 // calcium-independent cell-cell adhesion // inferred from sequence or structural similari   |
| 647.3494        | 533.822         | 553.8348       | 532.7884       | NM_025654//XM_C         | 0.007              | <b>-1.26 Rdm1</b>                 | RAD52 motif 1                                                                                               | 0006281 // DNA repair // inferred from electronic annotation//0006310 // DNA recombination // i      |
| 253.92201       | 210.80324       | 225.56322      | 194.11992      | NM_010149//XM_C         | 0.008              | <b>-1.26 Epor</b>                 | erythropoietin receptor                                                                                     | 0003007 // heart morphogenesis // traceable author statement//0007165 // signal transduction //      |
| 196.90826       | 162.69772       | 181.02365      | 147.56238      | NM_001289545//N         | 0.009              | <b>-1.27 Atxn7l2</b>              | ataxin 7-like 2                                                                                             |                                                                                                      |
| 93.195366       | 73.56165        | 90.40237       | 72.39487       | NM_016879               | 0.010              | <b>-1.27 Krt85</b>                | keratin 85                                                                                                  | 0005198 // structural molecule activity // inferred from electronic annotation                       |
| 127.49215       | 103.226776      | 116.942314     | 112.266106     | NM_011575               | 0.007              | <b>-1.27 Tjfb</b>                 | trefoil factor 3, intestinal                                                                                | 0043434 // response to peptide hormone // inferred from electronic annotation                        |
| 17.175562       | 13.071379       | 16.109167      | 15.289264      | NM_009216//XM_C         | 0.009              | <b>-1.27 Sstr1</b>                | somatostatin receptor 1                                                                                     | 0007165 // signal transduction // inferred from electronic annotation//0007186 // G-protein coup     |
| 123.08723       | 99.16563        | 113.7869       | 87.01594       | NM_001271472//N         | 0.007              | <b>-1.27 Scube1</b>               | signal peptide, CUB domain, EGF-like 1                                                                      | 0051260 // protein homooligomerization // not recorded                                               |
| 95.829056       | 75.649574       | 81.587975      | 72.080086      | NM_027010               | 0.006              | <b>-1.27 Crypf</b>                | crystallin, gamma F                                                                                         | 0001654 // eye development // inferred from mutant phenotype                                         |
| 72.24196        | 55.609127       | 58.23118       | 52.30706       | NM_020281               | 0.010              | <b>-1.27 Magea7-ps</b>            | melanoma antigen, family A, 7, pseudogene                                                                   |                                                                                                      |
| 105.112625      | 83.908676       | 100.90135      | 83.98092       | NR_033644               | 0.006              | <b>-1.27 Fut4-ps1</b>             | fucosyltransferase 4, pseudogene 1                                                                          |                                                                                                      |
| 135.38937       | 109.49695       | 122.37774      | 120.672905     |                         | 0.006              | <b>-1.27 Gm9817</b>               | predicted gene 9817                                                                                         |                                                                                                      |
| 98.435875       | 77.79113        | 90.10433       | 82.813156      | NM_001286013//N         | 0.008              | <b>-1.28 Dlk2</b>                 | delta-like 2 homolog (Drosophila)                                                                           | 0045598 // regulation of fat cell differentiation // inferred from direct assay//0045746 // negative |
| 203.02264       | 166.5764        | 198.47736      | 169.81013      | NM_016758               | 0.008              | <b>-1.28 Rgs14</b>                | regulator of G-protein signaling 14                                                                         | 0006913 // nucleocytoplasmic transport // inferred from direct assay//0006913 // nucleocytoplasi     |
| 122.9893        | 98.98542        | 144.21889      | 144.48506      | NM_025293//NR_0         | 0.007              | <b>-1.28 Map2k3os</b>             | mitogen-activated protein kinase kinase 3, opposite strand                                                  |                                                                                                      |
| 179.89563       | 146.35768       | 145.30615      | 129.71944      | NM_001164504            | 0.009              | <b>-1.28 Rnf165</b>               | ring finger protein 165                                                                                     | 0000209 // protein polyubiquitination // inferred from direct assay//0007409 // axonogenesis // i    |
| 183.17429       | 148.62523       | 174.08365      | 147.92021      | NM_029674//XM_C         | 0.005              | <b>-1.28 Got1l1</b>               | glutamic-oxaloacetic transaminase 1-like 1                                                                  | 0006520 // cellular amino acid metabolic process // inferred from electronic annotation//0009058     |
| 52.171646       | 38.944023       | 44.56744       | 37.63602       | NM_001291003//N         | 0.007              | <b>-1.28 Astl</b>                 | astacin-like metalloendopeptidase (M12 family)                                                              | 0006508 // proteolysis // not recorded//0007155 // cell adhesion // inferred from mutant phenot      |
| 38.084817       | 28.472347       | 32.544216      | 27.684437      | NM_001113417//N         | 0.010              | <b>-1.29 Thrb</b>                 | thyroid hormone receptor beta                                                                               | 0000122 // negative regulation of transcription from RNA polymerase II promoter // inferred from     |
| 158.63492       | 128.17188       | 114.1938       | 98.5476        | NM_001014395//XI        | 0.007              | <b>-1.29 Fbxw22</b>               | F-box and WD-40 domain protein 22                                                                           | 0005515 // protein binding // inferred from electronic annotation                                    |
| 309.8575        | 253.10463       | 347.6294       | 367.98383      | NM_001033332//N         | 0.007              | <b>-1.29 Tmtc3</b>                | transmembrane and tetratricopeptide repeat containing 3                                                     | 0009791 // post-embryonic development // inferred from mutant phenotype//0010468 // regulat          |
| 219.79932       | 179.45233       | 271.2101       | 212.0827       | NM_011659//XM_C         | 0.005              | <b>-1.29 Tnfrsf4</b>              | tumor necrosis factor receptor superfamily, member 4                                                        | 0006954 // inflammatory response // inferred from mutant phenotype//0006954 // inflammatory          |
| 34.802086       | 25.539406       | 25.30799       | 21.920176      | NM_010003               | 0.004              | <b>-1.29 Cyp2c39</b>              | cytochrome P450, family 2, subfamily c, polypeptide 39                                                      | 0055114 // oxidation-reduction process // not recorded                                               |
| 173.29906       | 139.96109       | 162.00342      | 143.08072      | NM_001164787//N         | 0.009              | <b>-1.29 Spr2a1//Spr2a2//Sprs</b> | small proline-rich protein 2A1//small proline-rich protein 2A2//small proline-rich protein 2A3              | 0008360 // regulation of cell shape // traceable author statement//0008544 // epidermis developi     |
| 90.01554        | 69.47447        | 76.992645      | 62.95424       | NM_138942               | 0.005              | <b>-1.29 Dbh</b>                  | dopamine beta hydroxylase                                                                                   | 0001816 // cytokine production // inferred from mutant phenotype//0001974 // blood vessel rem        |
| 102.199936      | 80.10488        | 86.653336      | 71.46167       | NM_001286005//N         | 0.008              | <b>-1.29 Abcg8</b>                | ATP-binding cassette, sub-family G (WHITE), member 8                                                        | 0006200 // ATP catabolic process // not recorded//0006810 // transport // inferred from electroni    |
| 1912.5457       | 1521.142        | 1483.6912      | 1196.3813      | NM_001042451//N         | 0.006              | <b>-1.29 Snca</b>                 | synuclein, alpha                                                                                            | 0001774 // microglial cell activation // inferred from mutant phenotype//0001921 // positive regu    |
| 278.99896       | 227.83887       | 225.8744       | 223.39742      | NM_153778//XR_3         | 0.008              | <b>-1.29 Atoh8</b>                | atoh1 homolog 8 (Drosophila)                                                                                | 0006351 // transcription, DNA-templated // inferred from electronic annotation//0006355 // regu      |
| 147.75407       | 118.622314      | 138.62436      | 103.58865      | NM_001146024//N         | 0.005              | <b>-1.29 Zfp444</b>               | zinc finger protein 444                                                                                     | 0006351 // transcription, DNA-templated // inferred from electronic annotation//0006355 // regu      |
| 92.82695        | 71.83231        | 85.08331       | 69.96313       | NM_153166//XM_C         | 0.008              | <b>-1.29 Cpne5</b>                | copine V                                                                                                    | 0005515 // protein binding // inferred from electronic annotation                                    |
| 298.56296       | 242.8654        | 122.60571      | 131.46358      | NM_027975//XM_C         | 0.004              | <b>-1.30 Fam83d</b>               | family with sequence similarity 83, member D                                                                | 0007049 // cell cycle // inferred from electronic annotation//0007067 // mitotic nuclear division // |
| 140.08636       | 111.52555       | 123.66003      | 95.84841       | NM_001277891//N         | 0.008              | <b>-1.30 Fkbp6</b>                | FK506 binding protein 6                                                                                     | 0000413 // protein peptidyl-prolyl isomerization // inferred from direct assay//0006457 // protein   |
| 289.1875        | 235.82529       | 215.61014      | 244.2957       | NM_011465//XR_3         | 0.010              | <b>-1.30 Spta1</b>                | spectrin alpha, erythrocytic 1                                                                              | 0002260 // lymphocyte homeostasis // inferred from mutant phenotype//0006779 // porphyrin-ci         |
| 69.31573        | 52.203815       | 35.414585      | 38.15566       | NM_029993               | 0.010              | <b>-1.30 Milana</b>               | melan-A                                                                                                     | 0005515 // protein binding // inferred from electronic annotation                                    |
| 726.5355        | 578.12994       | 399.21225      | 448.62024      | NM_023716//NR_0         | 0.005              | <b>-1.30 Tubb2a-ps2//Tubb2b</b>   | tubulin, beta 2a, pseudogene 2//tubulin, beta 2B class IIb                                                  | 0001764 // neuron migration // not recorded//0006184 // GTP catabolic process // inferred from       |
| 119.47572       | 94.07049        | 107.52871      | 94.3088        | NM_010594               | 0.006              | <b>-1.30 Kap</b>                  | kidney androgen regulated protein                                                                           | 0005576 // extracellular region // inferred from electronic annotation//0005615 // extracellular s   |
| 75.21571        | 56.938393       | 64.870735      | 60.996178      | NM_001291009//N         | 0.004              | <b>-1.30 Pla2g10</b>              | phospholipase A2, group X                                                                                   | 0006629 // lipid metabolic process // inferred from electronic annotation//0006644 // phospholip     |
| 105.26999       | 82.063446       | 99.39066       | 86.30274       | NM_010359               | 0.005              | <b>-1.30 Gstm3</b>                | glutathione S-transferase, mu 3                                                                             | 0008152 // metabolic process // inferred from electronic annotation//0035690 // cellular respons     |
| 84.331116       | 64.2512         | 88.020134      | 83.82377       | NM_177716               | 0.008              | <b>-1.30 Cdc184</b>               | coiled-coil domain containing 184                                                                           | 0005737 // cytoplasm // not recorded                                                                 |
| 52.1203         | 38.33534        | 42.99889       | 35.81575       | NM_013513//XM_C         | 0.009              | <b>-1.31 Epb4.2</b>               | erythrocyte protein band 4.2                                                                                | 0000902 // cell morphogenesis // inferred from mutant phenotype//0008360 // regulation of cell       |

| [ICR, Air, PBS] | [ICR, Air, SFN] | [r-ICR, O2, PBS] | [ICR, O2, SFN] | [r-RefSeq Transcript ID p | FC Air-PBS:Air-SFN | Gene Symbol                        | Gene Title                                                                                                 | Gene Ontology                                                                                       |
|-----------------|-----------------|------------------|----------------|---------------------------|--------------------|------------------------------------|------------------------------------------------------------------------------------------------------------|-----------------------------------------------------------------------------------------------------|
| 212.21895       | 170.5844        | 174.9912         | 169.42062      | NM_146257//XM_C           | 0.004              | -1.31 <i>Slc29a4</i>               | solute carrier family 29 (nucleoside transporters), member 4                                               | 0006810 // transport // inferred from electronic annotation//0015844 // monoamine transport //      |
| 167.34294       | 133.49031       | 145.18858        | 113.6582       | NM_001159658//N           | 0.007              | -1.31 <i>Aqp12</i>                 | aquaporin 12                                                                                               | 0006810 // transport // inferred from electronic annotation                                         |
| 19.268366       | 13.963492       | 15.410205        | 16.685665      | NM_001164682//N           | 0.004              | -1.31 <i>Mpp4</i>                  | membrane protein, palmitoylated 4 (MAGUK p55 subfamily member 4)                                           | 0035418 // protein localization to synapse // inferred from mutant phenotype                        |
| 854.76196       | 674.4786        | 843.9976         | 619.2106       | NM_008026//XM_C           | 0.010              | -1.31 <i>Fil1</i>                  | Friend leukemia integration 1                                                                              | 0006351 // transcription, DNA-templated // inferred from electronic annotation//0006355 // regu     |
| 309.1059        | 247.5186        | 133.42593        | 396.6182       | NM_153143                 | 0.005              | -1.31 <i>Kctd11</i>                | potassium channel tetramerisation domain containing 11                                                     | 0007049 // cell cycle // inferred from electronic annotation//0007275 // multicellular organismal c |
| 34.855915       | 25.014982       | 51.533577        | 30.060123      | NM_001101482//N           | 0.010              | -1.31 <i>Mrap2</i>                 | metanorcin 2 receptor accessory protein 2                                                                  | 0006112 // energy reserve metabolic process // inferred from mutant phenotype//0007631 // tee       |
| 1418.3018       | 1110.2058       | 1206.4363        | 1114.341       | NM_018810//XM_C           | 0.009              | -1.32 <i>Mktn1</i>                 | makorin, ring finger, protein 1                                                                            | 0002009 // protein polyubiquitination // not recorded//0016567 // protein ubiquitination // infer   |
| 159.04988       | 125.36458       | 166.0116         | 161.58946      | NM_009086//XM_C           | 0.004              | -1.32 <i>Polr1b</i>                | polymerase (RNA) I polypeptide B                                                                           | 0006351 // transcription, DNA-templated // inferred from electronic annotation//0006360 // tran     |
| 71.58197        | 53.156208       | 68.10403         | 55.51835       | NM_009215                 | 0.004              | -1.32 <i>Sst</i>                   | somatostatin                                                                                               | 0001101 // response to acid // inferred from electronic annotation//0006972 // hyperosmotic res     |
| 202.7817        | 161.63774       | 196.9261         | 174.1229       | NM_033175//XM_C           | 0.003              | -1.32 <i>Lce3c</i>                 | late cornified envelope 3C                                                                                 | 0008544 // epidermis development // inferred from electronic annotation                             |
| 89.825806       | 67.95884        | 86.30454         | 81.59401       | NM_011564                 | 0.006              | -1.32 <i>Sry</i>                   | sex determining region of Chr Y                                                                            | 0000122 // negative regulation of transcription from RNA polymerase II promoter // inferred from    |
| 98.94794        | 75.56101        | 85.00992         | 79.62151       | NM_001037752              | 0.009              | -1.32 <i>Defb45</i>                | defensin beta 45                                                                                           | 0006952 // defense response // inferred from electronic annotation//0042742 // defense respons      |
| 97.75643        | 74.36971        | 95.53492         | 83.86803       | NM_013773                 | 0.008              | -1.32 <i>Tcl1b1</i>                | T cell leukemia/lymphoma 18, 1                                                                             |                                                                                                     |
| 118.85292       | 92.06245        | 100.898254       | 99.16808       | NM_013533//XM_C           | 0.004              | -1.32 <i>Gpr162</i>                | G protein-coupled receptor 162                                                                             | 0007165 // signal transduction // inferred from electronic annotation//0007186 // G-protein coup    |
| 59.832237       | 43.624027       | 56.743343        | 45.28395       | NM_133364//NM_1           | 0.003              | -1.32 <i>Prima1</i>                | proline rich membrane anchor 1                                                                             | 0042135 // neurotransmitter catabolic process // inferred from electronic annotation//0051649 //    |
| 81.612          | 61.001537       | 68.537994        | 62.277225      | NM_026094//XM_C           | 0.004              | -1.32 <i>Atp8b3</i>                | ATPase, class I, type 8B, member 3                                                                         | 0006200 // ATP catabolic process // inferred from mutant phenotype//0006810 // transport // inf     |
| 112.07336       | 86.23608        | 98.88991         | 77.975         | NM_001101507              | 0.005              | -1.32 <i>Clec2l</i>                | C-type lectin domain family 2, member L                                                                    | 0030246 // carbohydrate binding // inferred from electronic annotation                              |
| 234.62373       | 185.58629       | 203.69936        | 243.78697      | NM_001162947//N           | 0.009              | -1.33 <i>Nek3</i>                  | NIMA (never in mitosis gene a)-related expressed kinase 3                                                  | 0006468 // protein phosphorylation // inferred from direct assay//0007049 // cell cycle // inferre  |
| 223.89586       | 177.10966       | 209.33241        | 179.66913      | NM_026335                 | 0.008              | -1.33 <i>Lce1h</i>                 | late cornified envelope 1H                                                                                 | 0008544 // epidermis development // inferred from electronic annotation                             |
| 400.4553        | 317.61584       | 124.556145       | 131.25037      | NM_001172092//N           | 0.004              | -1.33 <i>Depdc1a</i>               | DEP domain containing 1a                                                                                   | 0006351 // transcription, DNA-templated // inferred from electronic annotation//0006355 // regu     |
| 57.976376       | 41.63485        | 49.633217        | 43.989952      | NM_001290138//N           | 0.005              | -1.33 <i>Ccdc169</i>               | coiled-coil domain containing 169                                                                          |                                                                                                     |
| 119.15712       | 91.36323        | 101.499985       | 112.21039      |                           | 0.007              | -1.33 <i>Proscos</i>               | proline synthetase co-transcribed, opposite strand                                                         |                                                                                                     |
| 1830.4143       | 1409.4471       | 1678.2566        | 1495.0209      | NM_001033988//N           | 0.005              | -1.34 <i>Ncoa4</i>                 | nuclear receptor coactivator 4                                                                             | 0005739 // mitochondrion // inferred from direct assay                                              |
| 634.9861        | 496.5077        | 607.4433         | 555.71094      | NM_001159403//N           | 0.003              | -1.34 <i>Nwd1</i>                  | NACHT and WD repeat domain containing 1                                                                    | 0000166 // nucleotide binding // inferred from electronic annotation//0005524 // ATP binding // i   |
| 46.89701        | 33.35833        | 38.454548        | 40.612354      | NM_001146002//N           | 0.004              | -1.34 <i>Txdcd2</i>                | thioredoxin domain containing 2 (spermatzoa)                                                               | 0006457 // protein folding // inferred from direct assay//0006662 // glycerol ether metabolic proc  |
| 415.41763       | 327.161         | 414.8405         | 318.99298      | NM_009362//XM_C           | 0.005              | -1.34 <i>Tjff1</i>                 | trefoil factor 1                                                                                           | 0006950 // response to stress // inferred from electronic annotation//0008285 // negative regulat   |
| 74.270355       | 54.45309        | 65.70019         | 62.32263       | NM_145227//XM_C           | 0.010              | -1.34 <i>Oas2</i>                  | 2'-5' oligoadenylate synthetase 2                                                                          | 0002376 // immune system process // inferred from electronic annotation//0006164 // purine nu       |
| 40.116776       | 28.177563       | 34.936478        | 26.704489      | NM_009611                 | 0.009              | -1.34 <i>Act17a</i>                | actin-like 7a                                                                                              | 0005515 // protein binding // inferred from electronic annotation                                   |
| 257.62292       | 201.16614       | 233.79413        | 180.62936      | NM_001195088//N           | 0.003              | -1.34 <i>Tmc8</i>                  | transmembrane channel-like gene family 8                                                                   | 0001558 // regulation of cell growth // not recorded//0006810 // transport // inferred from electr  |
| 90.14916        | 66.56017        | 79.27893         | 66.88353       | NM_177693//XM_C           | 0.004              | -1.35 <i>Lim2</i>                  | lens intrinsic membrane protein 2                                                                          | 0002088 // lens development in camera-type eye // inferred from mutant phenotype//0043010 //        |
| 144.51654       | 111.13407       | 131.40585        | 112.64854      | NM_029937//XM_C           | 0.005              | -1.35 <i>Nup210l</i>               | nucleoporin 210-like                                                                                       | 0007286 // spermatid development // inferred from mutant phenotype//0060009 // Sertoli cell de      |
| 123.47595       | 93.72944        | 105.83267        | 86.591354      | NM_027066                 | 0.002              | -1.35 <i>Tmem89</i>                | transmembrane protein 89                                                                                   | 0005634 // nucleus // not recorded//0016020 // membrane // inferred from electronic annotatio       |
| 126.65086       | 96.12836        | 117.36861        | 98.869774      | NM_022427//XM_C           | 0.003              | -1.35 <i>Gpr88</i>                 | G-protein coupled receptor 88                                                                              | 0007165 // signal transduction // inferred from electronic annotation//0007186 // G-protein coup    |
| 245.21848       | 190.1479        | 235.5229         | 183.3726       | NM_026415                 | 0.005              | -1.35 <i>Cysrt1</i>                | cysteine rich tail 1                                                                                       | 0070062 // extracellular vesicular exosome // not recorded                                          |
| 92.37111        | 68.36415        | 86.19487         | 101.24989      | NM_019577//XM_C           | 0.003              | -1.35 <i>Ccl24</i>                 | chemokine (C-C motif) ligand 24                                                                            | 0001938 // positive regulation of endothelial cell proliferation // not recorded//0006935 // chemic |
| 267.4976        | 207.83537       | 221.61696        | 206.91083      | NM_033610//XM_C           | 0.003              | -1.35 <i>Sncb</i>                  | synuclein, beta                                                                                            | 0007268 // synaptic transmission // inferred from genetic interaction//0042417 // dopamine met      |
| 154.00327       | 118.55258       | 146.33069        | 109.78352      | NM_010381//XM_C           | 0.005              | -1.35 <i>H2-Ea-ps</i>              | histocompatibility 2, class II antigen E alpha, pseudogene                                                 | 0002376 // immune system process // inferred from electronic annotation//0002504 // antigen pr      |
| 329.50635       | 256.1405        | 262.90204        | 209.00514      | NM_009446//NM_C           | 0.004              | -1.35 <i>Tuba3a//Tuba3b</i>        | tubulin, alpha 3A//tubulin, alpha 3B                                                                       | 0006184 // GTP catabolic process // inferred from electronic annotation//0007017 // microtubule     |
| 570.63544       | 439.5892        | 118.77344        | 795.83356      | NM_010240//NR_0           | 0.004              | -1.35 <i>Ftl1//Gm20746//LOC10</i>  | ferritin light chain 1//predicted gene, 20746//ferritin light chain 1-like//microRNA 692-1//microRNA 692-2 | 0006826 // iron ion transport // inferred from electronic annotation//0006879 // cellular iron i    |
| 120.8282        | 91.25962        | 117.8239         | 88.65962       | NM_028799                 | 0.007              | -1.35 <i>Tgm5</i>                  | transglutaminase 5                                                                                         | 0018149 // peptide cross-linking // inferred from electronic annotation                             |
| 316.18216       | 246.53752       | 280.0087         | 225.70671      | NM_007847                 | 0.004              | -1.35 <i>Defa-rs2</i>              | defensin, alpha, related sequence 2                                                                        | 0006952 // defense response // inferred from electronic annotation//0032496 // response to lipo     |
| 114.57776       | 86.26772        | 93.530205        | 82.40197       | NM_011139                 | 0.005              | -1.36 <i>Pou2f3</i>                | POU domain, class 2, transcription factor 3                                                                | 0006351 // transcription, DNA-templated // inferred from electronic annotation//0006355 // regu     |
| 768.80475       | 586.56995       | 713.0906         | 581.60895      | NM_001037326//N           | 0.004              | -1.36 <i>Cstf3</i>                 | cleavage stimulation factor, 3' pre-RNA, subunit 3                                                         | 0006396 // RNA processing // inferred from electronic annotation//0006397 // mRNA processing,       |
| 23.973154       | 16.474997       | 23.403814        | 19.023779      | NM_001271716//N           | 0.005              | -1.36 <i>Mc2r</i>                  | melanocortin 2 receptor                                                                                    | 0001890 // placenta development // inferred from electronic annotation//0007165 // signal trans     |
| 111.86112       | 83.63365        | 79.2544          | 69.56707       | NM_054095//XM_C           | 0.002              | -1.36 <i>Necab2</i>                | N-terminal EF-hand calcium binding protein 2                                                               | 0005509 // calcium ion binding // inferred from electronic annotation//0005515 // protein bindi     |
| 458.6414        | 352.86316       | 424.442          | 353.3893       | NM_011025//XM_C           | 0.005              | -1.36 <i>Oxt</i>                   | oxytocin                                                                                                   | 0001975 // response to amphetamine // inferred from electronic annotation//0002027 // regulat       |
| 136.53804       | 103.31054       | 122.66202        | 98.57161       | NM_010601//XM_C           | 0.005              | -1.36 <i>Kcnh3</i>                 | potassium voltage-gated channel, subfamily H (eag-related), member 3                                       | 0000160 // phosphorelay signal transduction system // inferred from electronic annotation//0006     |
| 64.143814       | 45.74545        | 51.07201         | 46.518984      | NM_157427//XM_C           | 0.002              | -1.36 <i>Fam163b</i>               | family with sequence similarity 163, member B                                                              | 0016020 // membrane // inferred from electronic annotation//0016021 // integral component of        |
| 190.85114       | 145.67776       | 180.23357        | 133.79602      | NM_001039049              | 0.003              | -1.37 <i>Cox8c</i>                 | cytochrome c oxidase subunit VIIIc                                                                         | 1902600 // hydrogen ion transmembrane transport // inferred from electronic annotation              |
| 793.64496       | 602.3772        | 1253.9342        | 1009.8993      | NM_027464//XM_C           | 0.008              | -1.37 <i>Fam213a</i>               | family with sequence similarity 213, member A                                                              | 0045670 // regulation of osteoclast differentiation // not recorded//0055114 // oxidation-reduct    |
| 101.43361       | 74.699875       | 103.13095        | 89.84359       | NM_177897//XR_3i          | 0.002              | -1.37 <i>B4galnt4</i>              | beta-1,4-N-acetyl-galactosaminyl transferase 4                                                             | 0008152 // metabolic process // not recorded                                                        |
| 109.99309       | 81.30346        | 47.028076        | 54.925083      | NM_010883                 | 0.008              | -1.38 <i>Ndp</i>                   | Norrie disease (pseudoglioma) (human)                                                                      | 0001890 // placenta development // inferred from mutant phenotype//0016055 // Wnt signaling         |
| 65.868324       | 46.16065        | 49.529713        | 49.381584      | NM_022888//NM_1           | 0.004              | -1.38 <i>Folr4</i>                 | folate receptor 4 (delta)                                                                                  | 0007155 // cell adhesion // inferred from mutant phenotype//0007338 // single fertilization // inf  |
| 50.97551        | 35.07701        | 43.97094         | 39.995914      | NM_177448                 | 0.004              | -1.38 <i>Mogat2</i>                | monoacylglycerol O-acyltransferase 2                                                                       | 0006071 // glycerol metabolic process // inferred from electronic annotation//0006629 // lipid me   |
| 27.947567       | 18.82351        | 20.317287        | 20.69878       | NM_011996                 | 0.003              | -1.38 <i>Adh4</i>                  | alcohol dehydrogenase 4 (class II), pi polypeptide                                                         | 0001523 // retinoid metabolic process // not recorded//0006066 // alcohol metabolic process // n    |
| 37.492348       | 25.617674       | 33.39885         | 27.986418      | NM_001167879              | 0.002              | -1.38 <i>Gareml</i>                | GRB2 associated, regulator of MAPK1-like                                                                   |                                                                                                     |
| 1077.6061       | 804.4449        | 967.66095        | 831.316        | NM_026050//NM_1           | 0.005              | -1.39 <i>Fam220a</i>               | family with sequence similarity 220, member A                                                              | 0005634 // nucleus // inferred from electronic annotation                                           |
| 44.142605       | 29.923456       | 35.93549         | 33.383488      | NM_001171640              | 0.009              | -1.39 <i>Actl10</i>                | actin-like 10                                                                                              |                                                                                                     |
| 52.81152        | 36.34758        | 58.475872        | 50.886513      | NM_021325                 | 0.009              | -1.39 <i>Cd200r1</i>               | CD200 receptor 1                                                                                           | 0005886 // plasma membrane // inferred from electronic annotation//0009897 // external side of      |
| 163.92223       | 98.174416       | 126.482025       | 98.58774       | NM_147221//XM_C           | 0.003              | -1.39 <i>Glis1</i>                 | GLIS family zinc finger 1                                                                                  | 0000122 // negative regulation of transcription from RNA polymerase II promoter // inferred from    |
| 85.20198        | 60.45209        | 77.21883         | 75.55018       | NM_001290452//N           | 0.005              | -1.40 <i>Mzf1</i>                  | myeloid zinc finger 1                                                                                      | 0006351 // transcription, DNA-templated // inferred from electronic annotation//0006355 // regu     |
| 32.57386        | 21.949392       | 26.60658         | 22.348583      | NM_021340//XM_C           | 0.006              | -1.40 <i>Rgr</i>                   | retinal G-protein coupled receptor                                                                         | 0006935 // chemotaxis // inferred from electronic annotation//0007165 // signal transduction // i   |
| 910.95795       | 672.1001        | 746.25885        | 507.74216      | NM_146008                 | 0.006              | -1.40 <i>Tcp11l2</i>               | t-complex 11 (mouse) like 2                                                                                | 0000737 // DNA catabolic process, endonucleolytic // not recorded                                   |
| 185.12082       | 137.07129       | 166.49597        | 140.58675      | NM_001172136//N           | 0.003              | -1.41 <i>Exog</i>                  | endo/exonuclease (5'-3'), endonuclease G-like                                                              | 0006915 // apoptotic process // inferred from electronic annotation//0007165 // signal transducti   |
| 164.9194        | 121.29307       | 159.21935        | 134.45238      | NM_001033433              | 0.002              | -1.41 <i>Tmem102</i>               | transmembrane protein 102                                                                                  | 0007623 // circadian rhythm // not recorded//0008152 // metabolic process // inferred from elect    |
| 243.08191       | 179.99983       | 216.03056        | 181.9311       | NM_001081327//N           | 0.001              | -1.41 <i>Hs3st2</i>                | heparan sulfate (glucosaminyl) 3-O-sulfotransferase 2                                                      | 0006351 // transcription, DNA-templated // not recorded//0006355 // regulation of transcription,    |
| 266.2953        | 195.99948       | 226.59492        | 196.62822      | NM_008701//XM_C           | 0.004              | -1.42 <i>Nkx2-9</i>                | NK2 homeobox 9                                                                                             | 0002084 // protein depalmitoylation // inferred from mutant phenotype//0006629 // lipid metab       |
| 729.0145        | 531.8995        | 741.53864        | 542.4106       | NM_008866//XM_C           | 0.009              | -1.42 <i>Lypla1</i>                | lysophospholipase 1                                                                                        |                                                                                                     |
| 28.390142       | 18.53598        | 22.333838        | 19.802942      | NM_027072                 | 0.006              | -1.43 <i>Plac8l1</i>               | PLAC8-like 1                                                                                               |                                                                                                     |
| 1052.9667       | 758.3665        | 981.7409         | 635.7656       | NM_013772//XM_C           | 0.001              | -1.44 <i>LOC100041483//Tct1b3</i>  | protein TCL1B3-like//T cell leukemia/lymphoma 18, 3                                                        | 0005515 // protein binding // inferred from electronic annotation//0008270 // zinc ion binding //   |
| 105.735435      | 73.71705        | 115.80032        | 76.45401       | NM_001099632              | 0.001              | -1.45 <i>Rnf39</i>                 | ring finger protein 39                                                                                     | 0008152 // metabolic process // inferred from electronic annotation//0008610 // lipid biosynthe     |
| 417.6363        | 304.8422        | 316.3287         | 257.26706      | NM_009338//NM_1           | 0.007              | -1.45 <i>Acat2//Acat3</i>          | acetyl-Coenzyme A acetyltransferase 2//acetyl-Coenzyme A acetyltransferase 3                               |                                                                                                     |
| 2521.7776       | 1759.38         | 2140.292         | 1843.2498      | NM_001142952//Xi          | 0.010              | -1.45 <i>Fam46c</i>                | family with sequence similarity 46, member C                                                               | 0007165 // signal transduction // inferred from electronic annotation//0007399 // nervous system    |
| 332.6392        | 240.5345        | 273.74942        | 220.21518      | NM_001113246//N           | 0.009              | -1.46 <i>Chn1</i>                  | chimerin 1                                                                                                 |                                                                                                     |
| 123.77513       | 86.37831        | 112.16693        | 94.96171       |                           | 0.002              | -1.46 <i>Ai043046</i>              | expressed sequence AI043046                                                                                | 0007165 // signal transduction // inferred from electronic annotation//0007186 // G-protein coup    |
| 35.13173        | 22.373497       | 30.004507        | 24.36192       | NM_008177                 | 0.002              | -1.48 <i>Grpr</i>                  | gastrin releasing peptide receptor                                                                         | 0007262 // STAT protein import into nucleus // inferred from sequence or structural similarity//00  |
| 118.34083       | 81.60523        | 101.33044        | 91.47962       | NM_001380//XM_C           | 0.003              | -1.48 <i>Il20</i>                  | interleukin 20                                                                                             | 0031072 // heat shock protein binding // inferred from electronic annotation//00051082 // unfold    |
| 60.153282       | 38.781097       | 45.226504        | 39.583744      | NM_175525//XM_C           | 0.001              | -1.49 <i>Ssu2</i>                  | ssu-2 homolog (C. elegans)                                                                                 | 0006081 // cellular aldehyde metabolic process // inferred from electronic annotation//0008152 //   |
| 36.701405       | 23.111998       | 31.468988        | 24.574776      | NM_001177438//N           | 0.005              | -1.50 <i>1700055N04Rik//Aldh3b</i> | RIKEN cDNA 1700055N04 gene//aldehyde dehydrogenase 3 family, member B2//aldehyde dehydrogenase 3           | 0006334 // nucleosome assembly // inferred from electronic annotation                               |
| 963.528         | 654.9564        | 940.2358         | 716.4789       | NM_009433                 | 0.010              | -1.52 <i>Tsyp1l</i>                | testis-specific protein, Y-encoded-like 1                                                                  |                                                                                                     |

| [ICR, Air, PBS] | [ICR, Air, SFN] | [ICR, O2, PBS] | [ICR, O2, SFN] | RefSeq Transcript ID | p     | FC Air-PBS:Air-SFN | Gene Symbol    | Gene Title                                                  | Gene Ontology                                                                                     |
|-----------------|-----------------|----------------|----------------|----------------------|-------|--------------------|----------------|-------------------------------------------------------------|---------------------------------------------------------------------------------------------------|
| 152.2644        | 102.52239       | 134.26436      | 104.37595      | NM_029667            | 0.001 | -1.52              | <b>Lce1l</b>   | late cornified envelope 1l                                  | 0008544 // epidermis development // inferred from electronic annotation                           |
| 101.94964       | 66.872055       | 81.4693        | 76.863785      | NM_001136237//N      | 0.002 | -1.52              | <b>Slc39a5</b> | solute carrier family 39 (metal ion transporter), member 5  | 0006810 // transport // inferred from electronic annotation//0006811 // ion transport // inferred |
| 90.53483        | 58.597626       | 54.37917       | 45.056515      | NM_019538//XM_c      | 0.004 | -1.53              | <b>Plac1</b>   | placental specific protein 1                                | 0001890 // placenta development // inferred from expression pattern//0001890 // placenta devel    |
| 66.74981        | 42.613354       | 57.500587      | 50.571495      | NM_013797//XM_c      | 0.004 | -1.53              | <b>Slco1a1</b> | solute carrier organic anion transporter family, member 1a1 | 0006810 // transport // inferred from electronic annotation//0006811 // ion transport // inferred |
| 604.0621        | 408.2919        | 385.23013      | 427.03336      | NM_145587//XM_c      | 0.009 | -1.54              | <b>Sbk1</b>    | SH3-binding kinase 1                                        | 0006468 // protein phosphorylation // inferred from electronic annotation//0016310 // phosphor    |
| 197.70314       | 132.63347       | 421.5775       | 396.7446       | NM_010501            | 0.008 | -1.56              | <b>Ifit3</b>   | interferon-induced protein with tetratricopeptide repeats 3 | 0002376 // immune system process // inferred from electronic annotation//0008285 // negative r    |
| 2791.4875       | 1792.2322       | 2109.443       | 1831.4321      | NM_007563//XM_c      | 0.006 | -1.56              | <b>Bpgm</b>    | 2,3-bisphosphoglycerate mutase                              | 0006096 // glycolytic process // inferred from electronic annotation//0008152 // metabolic proce: |
| 124.81598       | 79.31379        | 87.99361       | 72.32608       | NM_027292            | 0.003 | -1.60              | <b>Tspo2</b>   | translocator protein 2                                      | 0006810 // transport // inferred from electronic annotation                                       |
| 24.214493       | 13.980096       | 20.205318      | 16.6023        | NM_029536            | 0.001 | -1.64              | <b>Gpr165</b>  | G protein-coupled receptor 165                              | 0007165 // signal transduction // inferred from electronic annotation//0007186 // G-protein coup  |

**Table S2. Prenatal sulforaphane-altered 918 lung genes in postnatal air-exposed *Nrf2*<sup>-/-</sup> mice (n=918, moderated T-Test, P<=0.01)**

RIKEN cDNA and predicted genes excluded. Fold Change (FC): Blue (-) - fold lower in SFN than PBS, Red - fold higher in SFN than PBS.

| [Nrf2-KO, Air, PBS] | [Nrf2-KO, Air, SFN] | RefSeq Transcript ID | p     | FC PBS:SFN | Gene Symbol                         | Gene Title                                                                        | Gene Ontology                                                                                                                |
|---------------------|---------------------|----------------------|-------|------------|-------------------------------------|-----------------------------------------------------------------------------------|------------------------------------------------------------------------------------------------------------------------------|
| 248.11972           | 666.50073           | NM_001030294///XN    | 0.007 | 2.73       | <i>Olfm4</i>                        | olfactomedin 4                                                                    | 0007155 // cell adhesion // inferred from electronic annotation///0043124 // negative regulation of I-kappaB kinase activity |
| 484.7015            | 1256.8951           | NR_003513            | 0.000 | 2.66       | <i>Neat1</i>                        | nuclear paraspeckle assembly transcript 1 (non-protein coding)///---              | 0030575 // nuclear body organization // inferred from mutant phenotype///0043954 // cellular component maintenance           |
| 231.03038           | 564.68445           | NM_144513///NR_0C    | 0.001 | 2.46       | <i>Meg3</i>                         | maternally expressed 3///---                                                      | 0001701 // in utero embryonic development // inferred from mutant phenotype///0001889 // liver development /                 |
| 919.71274           | 2061.3145           | NM_001082543///NM    | 0.009 | 2.33       | <i>BC100530///Stfo1</i>             | cDNA sequence BC100530///stefin A1                                                | 0010466 // negative regulation of peptidase activity // inferred from electronic annotation///0010951 // negative i          |
| 30.045393           | 63.700813           | NM_139134///XM_0     | 0.000 | 2.04       | <i>Chodl</i>                        | chondrolectin                                                                     | 0005540 // hyaluronic acid binding // inferred from sequence or structural similarity///0030246 // carbohydrate bi           |
| 47.849865           | 102.033646          | NM_011410///XM_0     | 0.001 | 2.02       | <i>Slfn4</i>                        | schlafen 4                                                                        | 0005524 // ATP binding // inferred from electronic annotation                                                                |
| 491.72003           | 962.13226           | NM_023665            | 0.000 | 2.00       | <i>Rsrp1</i>                        | arginine/serine rich protein 1                                                    |                                                                                                                              |
| 1075.8644           | 2057.7217           | NM_001042634///NM    | 0.000 | 1.98       | <i>Clk1</i>                         | CDC-like kinase 1                                                                 | 0006468 // protein phosphorylation // not recorded///0016310 // phosphorylation // inferred from electronic ann              |
| 30.43497            | 62.552834           | NM_001110505///NM    | 0.000 | 1.98       | <i>Amy1///Rnpc3</i>                 | amylase 1, salivary///RNA-binding region (RNP1, RRM) containing 3                 | 0005975 // carbohydrate metabolic process // inferred from electronic annotation///0008152 // metabolic proces               |
| 83.35101            | 168.04236           | NM_001037743///XN    | 0.002 | 1.96       | <i>4921506M07Rik///LOC102642336</i> | RIKEN cDNA 4921506M07 gene///tetratricopeptide repeat protein 6-like              | 0005515 // protein binding // inferred from electronic annotation                                                            |
| 521.4066            | 989.1873            | NM_018856///NM_2     | 0.000 | 1.93       | <i>Ccnl2</i>                        | cyclin L2                                                                         | 0000079 // regulation of cyclin-dependent protein serine/threonine kinase activity // inferred from electronic ann           |
| 48.200565           | 94.03042            | NM_178278///XM_0     | 0.001 | 1.84       | <i>Caps2</i>                        | calcyphosphine 2                                                                  | 0005509 // calcium ion binding // inferred from electronic annotation///0046872 // metal ion binding // inferred fi          |
| 349.55603           | 617.0719            | NM_144847///XM_0     | 0.004 | 1.78       | <i>Nrbp2</i>                        | nuclear receptor binding protein 2                                                | 0006468 // protein phosphorylation // inferred from electronic annotation///0007399 // nervous system developm               |
| 230.99739           | 407.30475           | NM_009903            | 0.005 | 1.77       | <i>Clcn4</i>                        | claudin 4                                                                         | 0007565 // female pregnancy // inferred from electronic annotation///0016338 // calcium-independent cell-cell ac             |
| 54.208763           | 100.84891           | NR_015505///NR_02    | 0.000 | 1.76       | <i>Firre</i>                        | functional intergenic repeating RNA element                                       |                                                                                                                              |
| 163.32114           | 285.9527            | NR_015531            | 0.006 | 1.75       | <i>Dancr</i>                        | differentiation antagonizing non-protein coding RNA                               |                                                                                                                              |
| 51.093113           | 94.192444           | NM_001037743///XN    | 0.002 | 1.73       | <i>4921506M07Rik///LOC102642336</i> | RIKEN cDNA 4921506M07 gene///tetratricopeptide repeat protein 6-like              | 0005515 // protein binding // inferred from electronic annotation                                                            |
| 47.613567           | 86.71949            | NM_007749            | 0.005 | 1.73       | <i>Cox7c</i>                        | cytochrome c oxidase subunit VIIc                                                 | 1902600 // hydrogen ion transmembrane transport // inferred from electronic annotation                                       |
| 360.36276           | 616.44116           | NM_172779///XM_0     | 0.000 | 1.72       | <i>Ddx26b</i>                       | DEAD/H (Asp-Glu-Ala-Asp/His) box polypeptide 26B                                  |                                                                                                                              |
| 406.63916           | 691.392             | NM_001159632///NM    | 0.000 | 1.72       | <i>Atpv61c2</i>                     | ATPase, H+ transporting, lysosomal V1 subunit C2                                  | 0006200 // ATP catabolic process // inferred from direct assay///0006810 // transport // inferred from electronic a          |
| 33.014507           | 59.086693           | NM_172864            | 0.010 | 1.72       | <i>Wdr63</i>                        | WD repeat domain 63                                                               | 0005515 // protein binding // inferred from electronic annotation                                                            |
| 314.8336            | 536.64435           | NM_023755///XM_0     | 0.003 | 1.72       | <i>Tjcp2l1</i>                      | transcription factor CP2-like 1                                                   | 0000122 // negative regulation of transcription from RNA polymerase II promoter // inferred from direct assay///0            |
| 396.84558           | 672.9599            | NM_001290533///NM    | 0.000 | 1.71       | <i>Ogt</i>                          | O-linked N-acetylglucosamine (GlcNAc) transferase (UDP-N-acetylglucosamine:poly   | 0006110 // regulation of glycolytic process // not recorded///0006486 // protein glycosylation // inferred from ele          |
| 1034.6279           | 1705.6106           | NM_010821///XM_0     | 0.002 | 1.70       | <i>Mpeg1</i>                        | macrophage expressed gene 1                                                       | 0016020 // membrane // inferred from electronic annotation///0016021 // integral component of membrane // in                 |
| 82.523415           | 145.46419           | NM_175430///XM_0     | 0.007 | 1.68       | <i>Cdc40</i>                        | coiled-coil domain containing 40                                                  | 0001947 // heart looping // not recorded///0003341 // cilium movement // inferred from mutant phenotype///00                 |
| 118.005165          | 203.55351           | NR_029382///NR_02    | 0.000 | 1.68       | <i>Mir17hg///Mir92-1</i>            | Mir17 host gene 1 (non-protein coding)///microRNA 92-1                            | 0001701 // in utero embryonic development // inferred from genetic interaction///0002329 // pre-B cell differenti            |
| 185.878             | 308.80588           | NM_007714///XM_0     | 0.000 | 1.65       | <i>Clk4</i>                         | CDC like kinase 4                                                                 | 0006468 // protein phosphorylation // inferred from electronic annotation///0016310 // phosphorylation // infer              |
| 433.29846           | 705.4861            | NM_001113136///NM    | 0.000 | 1.65       | <i>Ptpcr</i>                        | protein tyrosine phosphatase, receptor type, C                                    | 0000187 // activation of MAPK activity // inferred from mutant phenotype///0001915 // negative regulation of T c             |
| 863.275             | 1382.106            | NM_025951///NM_0     | 0.003 | 1.65       | <i>Plk42b</i>                       | phosphatidylinositol 4-kinase type 2 beta                                         | 0016310 // phosphorylation // inferred from electronic annotation///0046854 // phosphatidylinositol phosphoryla              |
| 168.4762            | 278.56406           | NM_026985///XM_0     | 0.003 | 1.64       | <i>Mcomp1</i>                       | mast cell expressed membrane protein 1                                            | 0016020 // membrane // inferred from electronic annotation///0016021 // integral component of membrane // in                 |
| 156.02037           | 253.80077           | NM_001252401///NM    | 0.001 | 1.61       | <i>Tle2</i>                         | transducin-like enhancer of split 2, homolog of Drosophila E(spl)                 | 0006351 // transcription, DNA-templated // inferred from electronic annotation///0006355 // regulation of transci            |
| 18.54299            | 29.746069           | NM_010870///XM_0     | 0.009 | 1.60       | <i>Naip5</i>                        | NLR family, apoptosis inhibitory protein 5                                        | 0002376 // immune system process // inferred from electronic annotation///0006915 // apoptotic process // infer              |
| 87.88481            | 147.03099           | NM_001099633///XN    | 0.004 | 1.60       | <i>Dnah9</i>                        | dynein, axonemal, heavy chain 9                                                   | 0006200 // ATP catabolic process // inferred from electronic annotation///0007018 // microtubule-based moveme                |
| 5237.8335           | 8342.986            | NM_001079694///NM    | 0.002 | 1.60       | <i>Srsf5</i>                        | serine/arginine-rich splicing factor 5                                            | 0006351 // transcription, DNA-templated // inferred from electronic annotation///0006355 // regulation of transci            |
| 224.72978           | 357.68903           | NM_001025566///NM    | 0.001 | 1.59       | <i>Chka</i>                         | choline kinase alpha                                                              | 0006629 // lipid metabolic process // inferred from electronic annotation///0006646 // phosphatidylethanolamine              |
| 152.43263           | 243.70963           | NM_010877///XM_0     | 0.003 | 1.58       | <i>Ncf2</i>                         | neutrophil cytosolic factor 2                                                     | 0006742 // NADP catabolic process // not recorded///0006801 // superoxide metabolic process // not recorded///               |
| 333.3535            | 517.65094           | NM_026110///XR_38    | 0.000 | 1.57       | <i>Paxbp1</i>                       | PAX3 and PAX7 binding protein 1                                                   | 0006351 // transcription, DNA-templated // inferred from electronic annotation///0006355 // regulation of transci            |
| 319.89084           | 494.23187           | NM_009841            | 0.002 | 1.55       | <i>Cd14</i>                         | CD14 antigen                                                                      | 0002237 // response to molecule of bacterial origin // inferred from direct assay///0002376 // immune system pro             |
| 353.4351            | 543.24054           | NR_027008///NR_02    | 0.001 | 1.55       | <i>Gt(ROSA)26Sor</i>                | gene trap ROSA 26, Philippe Soriano                                               |                                                                                                                              |
| 173.75519           | 271.15042           | NM_001159299///NM    | 0.003 | 1.55       | <i>Itih4</i>                        | inter alpha-trypsin inhibitor, heavy chain 4                                      | 0006953 // acute-phase response // inferred from electronic annotation///0010466 // negative regulation of pepti             |
| 1384.8971           | 2067.0303           | NM_007705///XM_0     | 0.001 | 1.54       | <i>Cirbp</i>                        | cold inducible RNA binding protein                                                | 0006950 // response to stress // inferred from electronic annotation///0009409 // response to cold // inferred fro           |
| 540.30457           | 814.6418            | NR_030711            | 0.000 | 1.53       | <i>Mir22hg</i>                      | Mir22 host gene (non-protein coding)                                              |                                                                                                                              |
| 12.886861           | 19.568853           | NM_001085518///NM    | 0.005 | 1.52       | <i>Gm14085///Sic28a2</i>            | predicted gene 14085///solute carrier family 28 (sodium-coupled nucleoside transp | 0001895 // retina homeostasis // not recorded///0006810 // transport // inferred from electronic annotation///00             |
| 266.34436           | 405.37885           | NM_177268///XM_0     | 0.001 | 1.52       | <i>Ankrd16</i>                      | ankyrin repeat domain 16                                                          | 0005515 // protein binding // inferred from electronic annotation                                                            |
| 4281.399            | 6319.4473           | NM_001123037///NM    | 0.002 | 1.51       | <i>Eif4a2</i>                       | eukaryotic translation initiation factor 4A2                                      | 0006200 // ATP catabolic process // inferred from electronic annotation///0006412 // translation // inferred from            |
| 965.78796           | 1409.3214           | NM_023842///XM_0     | 0.004 | 1.51       | <i>Dsp</i>                          | desmoplakin                                                                       | 0002934 // desmosome organization // inferred from mutant phenotype///0003223 // ventricular compact myoca                   |
| 14.523185           | 21.862753           | NR_028555            | 0.005 | 1.51       | <i>Snord89</i>                      | small nucleolar RNA, C/D box 89                                                   |                                                                                                                              |
| 47.770977           | 75.73093            | NM_030110///XM_0     | 0.002 | 1.51       | <i>Micu3</i>                        | mitochondrial calcium uptake family, member 3                                     | 0005509 // calcium ion binding // inferred from electronic annotation///0046872 // metal ion binding // inferred fi          |
| 1796.5664           | 2621.1614           | NM_001271538///NM    | 0.001 | 1.51       | <i>Myh14</i>                        | myosin, heavy polypeptide 14                                                      | 0003009 // skeletal muscle contraction // not recorded///0006200 // ATP catabolic process // inferred from direct            |
| 146.00955           | 222.34581           | NM_001163489///NM    | 0.001 | 1.50       | <i>Sema4a</i>                       | sema domain, immunoglobulin domain (Ig), transmembrane domain (TM) and short      | 00001525 // angiogenesis // inferred from electronic annotation///0002292 // T cell differentiation involved in imm          |
| 324.76068           | 484.28998           | NM_001160378///NM    | 0.004 | 1.50       | <i>Fam46a</i>                       | family with sequence similarity 46, member A                                      | 0044822 // poly(A) RNA binding // not recorded                                                                               |
| 59.42976            | 95.02456            | NM_183276            | 0.000 | 1.50       | <i>Nbeal2</i>                       | neurobeachin-like 2                                                               | 0007596 // blood coagulation // inferred from mutant phenotype///0030220 // platelet formation // not recorded               |
| 444.4374            | 659.4524            | NM_181595///XM_0     | 0.003 | 1.50       | <i>Ppp19a</i>                       | protein phosphatase 1, regulatory (inhibitor) subunit 9A                          | 0007015 // actin filament organization // inferred from physical interaction///0019722 // calcium-mediated signali           |
| 37.036602           | 57.648235           | NM_001244617///NM    | 0.005 | 1.49       | <i>B4galnt1</i>                     | beta-1,4-N-acetyl-galactosaminyl transferase 1                                    | 0001574 // ganglioside biosynthetic process // inferred from genetic interaction///0001574 // ganglioside biosynt            |
| 59.582714           | 94.57021            | NR_033641///NR_11    | 0.002 | 1.49       | <i>Cnde</i>                         | colorectal neoplasia differentially expressed (non-protein coding)                |                                                                                                                              |
| 221.61835           | 330.93765           | NM_016805///XR_37    | 0.002 | 1.49       | <i>AI503316///Hnnpnu</i>            | expressed sequence AI503316///heterogeneous nuclear ribonucleoprotein U           | 0001649 // osteoblast differentiation // not recorded///0006397 // mRNA processing // inferred from electronic a             |
| 265.57697           | 395.9591            | NM_001163507///NM    | 0.006 | 1.49       | <i>Mmm1</i>                         | multimerin 1                                                                      | 0005509 // calcium ion binding // inferred from electronic annotation///0005515 // protein binding // inferred fro           |
| 558.2761            | 815.70386           | NM_020008            | 0.007 | 1.49       | <i>Clec7a</i>                       | C-type lectin domain family 7, member a                                           | 0001878 // response to yeast // inferred from direct assay///0001879 // detection of yeast // inferred from direct           |
| 67.38696            | 106.11947           | NM_001037138///NM    | 0.000 | 1.49       | <i>Cd300lb</i>                      | CD300 antigen like family member B                                                | 0002376 // immune system process // inferred from electronic annotation///0002446 // neutrophil mediated imm                 |
| 42.761967           | 66.288              | NM_001033371///NM    | 0.004 | 1.48       | <i>Lrrc36</i>                       | leucine rich repeat containing 36                                                 |                                                                                                                              |
| 1258.657            | 1816.5428           | NM_008259///XM_0     | 0.006 | 1.48       | <i>Foxa1</i>                        | forkhead box A1                                                                   | 0000122 // negative regulation of transcription from RNA polymerase II promoter // inferred from mutant phenoty              |
| 525.38477           | 761.0276            | NM_182995///XM_0     | 0.001 | 1.48       | <i>Ccp110</i>                       | centriolar coiled coil protein 110                                                | 0007099 // centriole replication // not recorded///0030030 // cell projection organization // inferred from electror         |
| 39.66738            | 61.26164            | NM_001081330///NM    | 0.004 | 1.47       | <i>Dnah2</i>                        | dynein, axonemal, heavy chain 2                                                   | 0001539 // cilium or flagellum-dependent cell motility // inferred from electronic annotation///0006200 // ATP cat           |
| 138.30579           | 208.84721           | NM_145931///NR_02    | 0.001 | 1.47       | <i>Zc3h7a</i>                       | zinc finger CCH type containing 7 A                                               | 0005515 // protein binding // inferred from electronic annotation///0044822 // poly(A) RNA binding // not record             |
| 88.47535            | 137.02032           | NM_001048148///NM    | 0.001 | 1.47       | <i>Lime1///Zgpat</i>                | Lck interacting transmembrane adaptor 1///zinc finger, CCH-type with G patch do   | 0002376 // immune system process // inferred from electronic annotation///0006351 // transcription, DNA-templ                |
| 113.04274           | 172.02422           | NM_001286037///NM    | 0.007 | 1.46       | <i>Ncf1</i>                         | neutrophil cytosolic factor 1                                                     | 0001878 // response to yeast // inferred from mutant phenotype///0001909 // leukocyte mediated cytotoxicity //               |
| 721.21643           | 1035.0679           | NM_001285917///NM    | 0.005 | 1.46       | <i>Dapk1</i>                        | death associated protein kinase 1                                                 | 0006417 // regulation of translation // inferred from electronic annotation///0006468 // protein phosphorylation /           |
| 107.57254           | 163.78413           | NM_001169153///NM    | 0.006 | 1.46       | <i>Cd300lf</i>                      | CD300 antigen like family member F                                                | 0002376 // immune system process // inferred from electronic annotation///0030316 // osteoclast differentiation              |
| 1211.1276           | 1722.7161           | NM_001042565///NM    | 0.002 | 1.46       | <i>Wsb1</i>                         | WD repeat and SOCS box-containing 1                                               | 0016567 // protein ubiquitination // inferred from electronic annotation///0035556 // intracellular signal transduc          |



| [Nrf2-KO, Air, PBS] | [Nrf2-KO, Air, SFN] | RefSeq           | Transcript ID | p     | FC   | PBS:SFN                        | Gene Symbol                                                                    | Gene Title                                                                                                                                                                                                                     | Gene Ontology |
|---------------------|---------------------|------------------|---------------|-------|------|--------------------------------|--------------------------------------------------------------------------------|--------------------------------------------------------------------------------------------------------------------------------------------------------------------------------------------------------------------------------|---------------|
| 420.41507           | 606.72095           | NM_010153        |               | 0.001 | 1.46 | <b>Erbb3</b>                   | v-erb-b2 erythroblastic leukemia viral oncogene homolog 3 (avian)              | 0003197 // endocardial cushion development // inferred from mutant phenotype//0006468 // protein phosphorylation                                                                                                               |               |
| 65.2575             | 101.230415          | NM_010172//XN_O  |               | 0.001 | 1.45 | <b>F7</b>                      | coagulation factor VII                                                         | 0002690 // positive regulation of leukocyte chemotaxis // not recorded//0006508 // proteolysis // not recorded//0008333 // endosome to lysosome transport // inferred from genetic interaction//0032313 // regulation of Rab G |               |
| 1635.5033           | 2296.8918           | NM_001081066//XN |               | 0.005 | 1.45 | <b>Dennd3</b>                  | DENN/MADD domain containing 3                                                  | 0002540 // leukotriene production involved in inflammatory response // inferred from mutant phenotype//00026                                                                                                                   |               |
| 637.93494           | 906.65656           | NM_000963        |               | 0.003 | 1.45 | <b>Alox5ap</b>                 | arachidonate 5-lipoxygenase activating protein                                 | 0001525 // angiogenesis // inferred from mutant phenotype//0006351 // transcription, DNA-templated // infer                                                                                                                    |               |
| 605.808             | 851.91              | NM_001083319//NN |               | 0.003 | 1.44 | <b>Ubp1</b>                    | upstream binding protein 1                                                     | 0006955 // immune response // inferred from electronic annotation//0010467 // gene expression // inferred from                                                                                                                 |               |
| 263.9472            | 379.15244           | NM_0008518       |               | 0.004 | 1.43 | <b>Ltb</b>                     | lymphotoxin B                                                                  | 0002244 // hematopoietic progenitor cell differentiation // inferred from mutant phenotype//0006910 // phagoc                                                                                                                  |               |
| 269.98145           | 384.48294           | NM_001177646//NN |               | 0.001 | 1.43 | <b>Sirpa</b>                   | signal-regulatory protein alpha                                                | 0005886 // plasma membrane // inferred from electronic annotation//0016020 // membrane // inferred from ele                                                                                                                    |               |
| 895.12146           | 1246.6874           | NM_013706        |               | 0.003 | 1.43 | <b>Cd52</b>                    | CD52 antigen                                                                   | 0006396 // RNA processing // inferred from electronic annotation                                                                                                                                                               |               |
| 415.05365           | 588.68115           | NM_001033261//XN |               | 0.002 | 1.43 | <b>Zfc3h1</b>                  | zinc finger, C3H1-type containing                                              | 0001122 // negative regulation of transcription from RNA polymerase II promoter // inferred from direct assay//0                                                                                                               |               |
| 76.22841            | 115.73562           | NM_001289877//NN |               | 0.002 | 1.43 | <b>Per3</b>                    | period circadian clock 3                                                       | 0006915 // apoptotic process // inferred from electronic annotation//0072661 // protein targeting to plasma me                                                                                                                 |               |
| 404.38428           | 571.02747           | NM_001081170//NN |               | 0.003 | 1.42 | <b>Pacs2</b>                   | phosphofurin acidic cluster sorting protein 2                                  | 0005524 // ATP binding // inferred from electronic annotation//0016301 // kinase activity // inferred from electr                                                                                                              |               |
| 98.16076            | 146.41182           | NM_133898//XN_O  |               | 0.009 | 1.42 | <b>N4bp21</b>                  | NEDD4 binding protein 2-like 1                                                 | 0008152 // metabolic process // inferred from electronic annotation//0016998 // cell wall macromolecule catabo                                                                                                                 |               |
| 10063.819           | 13977.084           | NM_017372        |               | 0.001 | 1.42 | <b>Lyz2</b>                    | lysozyme 2                                                                     | 0016021 // integral component of membrane // inferred from electronic annotation                                                                                                                                               |               |
| 760.2875            | 1051.3357           | NM_001114174//XN |               | 0.002 | 1.42 | <b>Fam189a2</b>                | family with sequence similarity 189, member A2                                 | 0000165 // MAPK cascade // inferred from direct assay//0000165 // MAPK cascade // not recorded//0000186 //                                                                                                                     |               |
| 319.055             | 448.22928           | NM_008580//XN_O  |               | 0.001 | 1.41 | <b>Map3k5</b>                  | mitogen-activated protein kinase kinase kinase 5                               | 0001822 // kidney development // inferred from mutant phenotype//0006211 // 5-methylcytosine catabolic proc                                                                                                                    |               |
| 402.90393           | 563.9757            | NM_001040400//NN |               | 0.008 | 1.41 | <b>Tet2</b>                    | tet methylcytosine dioxygenase 2                                               | 0005515 // protein binding // inferred from electronic annotation                                                                                                                                                              |               |
| 272.56906           | 382.9671            | NM_030075//XN_O  |               | 0.007 | 1.41 | <b>Klhdcb8</b>                 | kelch domain containing 8B                                                     | 0006810 // transport // inferred from electronic annotation                                                                                                                                                                    |               |
| 562.46075           | 777.54803           | NM_010686//XN_O  |               | 0.005 | 1.41 | <b>Laptm5</b>                  | lysosomal-associated protein transmembrane 5                                   | 0001505 // regulation of neurotransmitter levels // inferred from mutant phenotype//0001932 // regulation of pr                                                                                                                |               |
| 1160.15             | 1591.2454           | NM_010091//XN_O  |               | 0.006 | 1.40 | <b>Dvl1</b>                    | dishevelled, dsh homolog 1 (Drosophila)                                        | 0005515 // protein binding // inferred from electronic annotation                                                                                                                                                              |               |
| 1918.7164           | 2618.1584           | NM_001162926//NN |               | 0.002 | 1.40 | <b>Fam84b</b>                  | family with sequence similarity 84, member B                                   | 0001764 // neuron migration // inferred from genetic interaction//0001934 // positive regulation of protein phos                                                                                                               |               |
| 1219.1124           | 1655.5789           | NM_019521        |               | 0.008 | 1.40 | <b>Gas6</b>                    | growth arrest specific 6                                                       | 0005576 // extracellular region // inferred from electronic annotation//0016020 // membrane // inferred from el                                                                                                                |               |
| 146.06009           | 208.26578           | NM_028608//XN_O  |               | 0.009 | 1.40 | <b>Glipr1</b>                  | GLI pathogenesis-related 1 (glioma)                                            | 000122 // negative regulation of transcription from RNA polymerase II promoter // inferred from direct assay//0                                                                                                                |               |
| 343.43198           | 474.72325           | NM_172154//XN_O  |               | 0.001 | 1.40 | <b>Lcor</b>                    | ligand dependent nuclear receptor corepressor                                  | 0016020 // membrane // inferred from electronic annotation//0016021 // integral component of membrane // in                                                                                                                    |               |
| 408.04907           | 564.2121            | NM_175518//XN_O  |               | 0.003 | 1.40 | <b>Tmem245</b>                 | transmembrane protein 245                                                      | 000122 // negative regulation of transcription from RNA polymerase II promoter // not recorded//0006281 // Dt                                                                                                                  |               |
| 243.98155           | 339.63016           | NM_001113333//NN |               | 0.003 | 1.39 | <b>Cry2</b>                    | cryptochrome 2 (photolyase-like)                                               | 0005515 // protein binding // inferred from electronic annotation//0017137 // Rab GTPase binding // not recorde                                                                                                                |               |
| 329.148             | 455.91876           | NM_172771//XN_O  |               | 0.009 | 1.39 | <b>Dmx12</b>                   | Dmx-like 2                                                                     | 0006469 // negative regulation of protein kinase activity // not recorded//0032007 // negative regulation of TOR :                                                                                                             |               |
| 240.03908           | 334.49823           | NM_001037937//NN |               | 0.007 | 1.39 | <b>Deptor</b>                  | DEP domain containing MTOR-interacting protein                                 | 0006184 // GTP catabolic process // inferred from electronic annotation//0007165 // signal transduction // infern                                                                                                              |               |
| 98.49426            | 144.27295           | NM_001024474//XN |               | 0.008 | 1.39 | <b>Diras2</b>                  | DIRAS family, GTP-binding RAS-like 2                                           | 0005975 // carbohydrate metabolic process // inferred from electronic annotation//0006032 // chitin catabolic pr                                                                                                               |               |
| 37.372078           | 54.18356            | NM_007696        |               | 0.003 | 1.39 | <b>Ovgp1</b>                   | oviductal glycoprotein 1                                                       | 0007018 // microtubule-based movement // inferred from electronic annotation//0008152 // metabolic process /                                                                                                                   |               |
| 30.447065           | 43.374638           | NM_001033170//XN |               | 0.004 | 1.39 | <b>Fam83e</b>                  | family with sequence similarity 83, member E                                   | 0005515 // protein binding // inferred from physical interaction                                                                                                                                                               |               |
| 165.02611           | 232.23625           | NM_001109040//NN |               | 0.010 | 1.39 | <b>Kif21a</b>                  | kinesin family member 21A                                                      | 0032747 // positive regulation of interleukin-23 production // not recorded//0071345 // cellular response to cyto                                                                                                              |               |
| 210.46295           | 294.49002           | NR_029468        |               | 0.001 | 1.39 | <b>Snhg12</b>                  | small nucleolar RNA host gene 12                                               | 0032484 // Ral protein signal transduction // inferred from mutant phenotype//0032859 // activation of Ral GTPa                                                                                                                |               |
| 158.4037            | 224.60265           | NM_018828//XN_O  |               | 0.000 | 1.39 | <b>Fnbp4</b>                   | formin binding protein 4                                                       | 0001916 // positive regulation of T cell mediated cytotoxicity // not recorded//0002860 // positive regulation of n                                                                                                            |               |
| 204.90239           | 286.09262           | NM_008359//XN_O  |               | 0.001 | 1.38 | <b>Il17ra</b>                  | interleukin 17 receptor A                                                      | 0001541 // ovarian follicle development // inferred from mutant phenotype//0006351 // transcription, DNA-tem                                                                                                                   |               |
| 244.3725            | 337.89264           | NM_001033348//XN |               | 0.005 | 1.38 | <b>Ralgapa2</b>                | Ral GTPase activating protein, alpha subunit 2 (catalytic)                     | 0006376 // mRNA splice site selection // inferred from electronic annotation//0006397 // mRNA processing // inf                                                                                                                |               |
| 14.291265           | 19.655941           | NM_001159424//NN |               | 0.004 | 1.38 | <b>Il12a</b>                   | interleukin 12a                                                                | 0006281 // DNA repair // inferred from electronic annotation//0006351 // transcription, DNA-templated // infern                                                                                                                |               |
| 497.98553           | 681.2343            | NM_001290573//NN |               | 0.002 | 1.38 | <b>Kmt2b</b>                   | lysine (K)-specific methyltransferase 2B                                       | 0006085 // acetyl-CoA biosynthetic process // inferred from direct assay//0006085 // acetyl-CoA biosynthetic pro                                                                                                               |               |
| 1064.6938           | 1431.9719           | NM_026313//XN_O  |               | 0.002 | 1.38 | <b>Luc7l3//A1503301</b>        | LCUC-like 3 (S. cerevisiae)//expressed sequence A1503301                       | 0003341 // cilium movement // inferred by curator//0006200 // ATP catabolic process // inferred from electronic                                                                                                                |               |
| 695.4854            | 933.27936           | NR_002845        |               | 0.008 | 1.38 | <b>Copg2os2</b>                | coatamer protein complex, subunit gamma 2, opposite strand 2                   | 0006200 // ATP catabolic process // inferred from electronic annotation//0006810 // transport // inferred from el                                                                                                              |               |
| 118.432434          | 169.44498           | NM_001271962//NN |               | 0.004 | 1.38 | <b>Eya2</b>                    | eyes absent 2 homolog (Drosophila)                                             | 0001913 // T cell mediated cytotoxicity // ---//0002839 // positive regulation of immune response to tumor cell                                                                                                                |               |
| 274.48474           | 375.48              | NM_080575        |               | 0.003 | 1.37 | <b>Acs1</b>                    | acyl-CoA synthetase short-chain family member 1                                | 0007155 // cell adhesion // inferred from electronic annotation//0007420 // brain development // inferred from t                                                                                                               |               |
| 3024.07             | 4055.1255           | NM_030238        |               | 0.001 | 1.37 | <b>Dync1h1</b>                 | dynein cytoplasmic 1 heavy chain 1                                             | 0001525 // angiogenesis // inferred from electronic annotation//0001568 // blood vessel development // inferrec                                                                                                                |               |
| 360.7608            | 488.89444           | NM_147219//XN_O  |               | 0.007 | 1.37 | <b>Abca5</b>                   | ATP-binding cassette, sub-family A (ABC1), member 5                            | 0000082 // G1/S transition of mitotic cell cycle // inferred from direct assay//0006281 // DNA repair // inferred fr                                                                                                           |               |
| 20.263027           | 27.17836            | NM_010400        |               | 0.004 | 1.37 | <b>H60a</b>                    | histocompatibility 60a                                                         | 0016021 // integral component of membrane // inferred from electronic annotation                                                                                                                                               |               |
| 14.996394           | 20.318047           | NM_001145977//NN |               | 0.009 | 1.37 | <b>Cadm2</b>                   | cell adhesion molecule 2                                                       | 0006974 // cellular response to DNA damage stimulus // inferred from electronic annotation//0008152 // metabo                                                                                                                  |               |
| 1704.8632           | 2272.303            | NM_001164564//NN |               | 0.004 | 1.37 | <b>Egfl7</b>                   | EGF-like domain 7                                                              | 0030246 // carbohydrate binding // inferred from electronic annotation                                                                                                                                                         |               |
| 474.69678           | 642.2886            | NM_016756//NM_1  |               | 0.004 | 1.37 | <b>Cdk2</b>                    | cyclin-dependent kinase 2                                                      | 000122 // negative regulation of transcription from RNA polymerase II promoter // inferred from direct assay//0                                                                                                                |               |
| 12.984719           | 17.603836           | NM_001004182//XN |               | 0.001 | 1.36 | <b>A930009E05RIK//Tmem178b</b> | RIKEN cDNA A930009E05 gene//transmembrane protein 178B                         | 0001122 // negative regulation of transcription from RNA polymerase II promoter // inferred from mutant phenoty                                                                                                                |               |
| 218.60852           | 299.85828           | NM_001029856//XN |               | 0.002 | 1.36 | <b>Atad5</b>                   | ATPase family, AAA domain containing 5                                         | 0008152 // metabolic process // inferred from electronic annotation                                                                                                                                                            |               |
| 35.079273           | 49.494316           | NM_133203//XN_O  |               | 0.005 | 1.36 | <b>Klra17</b>                  | killer cell lectin-like receptor, subfamily A, member 17                       | 0006897 // endocytosis // inferred from electronic annotation                                                                                                                                                                  |               |
| 1136.2365           | 1499.445            | NM_001012330//NN |               | 0.002 | 1.36 | <b>Zbtb18</b>                  | zinc finger and BTB domain containing 18                                       | 0006000 // fructose metabolic process // inferred from electronic annotation//0006003 // fructose 2,6-bisphosph                                                                                                                |               |
| 1016.2122           | 1338.975            | NM_001163215//NN |               | 0.003 | 1.36 | <b>Fgfr3</b>                   | fibroblast growth factor receptor 3                                            | 0006749 // glutathione metabolic process // inferred from sequence or structural similarity                                                                                                                                    |               |
| 189.85846           | 261.89014           | NM_178440//XN_O  |               | 0.002 | 1.36 | <b>Myo1g</b>                   | myosin IG                                                                      | 000122 // negative regulation of transcription from RNA polymerase II promoter // inferred from genetic interact                                                                                                               |               |
| 51.388817           | 73.38285            | NM_013825        |               | 0.006 | 1.36 | <b>Ly75</b>                    | lymphocyte antigen 75                                                          | 0006397 // mRNA processing // inferred from electronic annotation//0006468 // protein phosphorylation // infer                                                                                                                 |               |
| 77.229774           | 111.39694           | NM_001162415//NN |               | 0.007 | 1.36 | <b>Pfkfb2</b>                  | 6-phosphofructo-2-kinase/fructose-2,6-bisphosphatase 2                         | 0007155 // cell adhesion // inferred from electronic annotation//0005091 // leukocyte tethering or rolling // infer                                                                                                            |               |
| 246.10506           | 333.69586           | NM_153122//XN_O  |               | 0.002 | 1.36 | <b>Oplah</b>                   | 5-oxoprolinase (ATP-hydrolysing)                                               | 0001938 // positive regulation of endothelial cell proliferation // not recorded//0007275 // multicellular organis                                                                                                             |               |
| 288.03516           | 388.91666           | NM_144913//XN_O  |               | 0.001 | 1.36 | <b>Mepce</b>                   | methylphosphate capping enzyme                                                 | 0006629 // lipid metabolic process // inferred from electronic annotation//0006631 // fatty acid metabolic proces                                                                                                              |               |
| 363.11362           | 488.96133           | NM_013830//XN_O  |               | 0.001 | 1.36 | <b>Prpf4b</b>                  | PRP4 pre-mRNA processing factor 4 homolog B (yeast)                            | 0006914 // autophagy // inferred from electronic annotation//0006915 // apoptotic process // inferred from elec                                                                                                                |               |
| 275.38635           | 372.4274            | NM_009151//XN_O  |               | 0.004 | 1.36 | <b>Selplg</b>                  | SELP4 platelet (p-selectin) ligand                                             | 0002931 // response to ischemia // inferred from direct assay//0035235 // ionotropic glutamate receptor signalin                                                                                                               |               |
| 198.40002           | 273.2777            | NM_030168//XN_O  |               | 0.003 | 1.36 | <b>Rictor</b>                  | RICTOR, independent companion of MTOR, complex 2                               | 0006378 // mRNA polyadenylation // traceable author statement                                                                                                                                                                  |               |
| 210.31165           | 288.02737           | NM_007692//NM_0  |               | 0.009 | 1.36 | <b>Chkb//ChkbCpt1b//Cpt1b</b>  | choline kinase beta//Chkb-Cpt1b readthrough transcript (NMD candidate)//carnit | 0000184 // nuclear-transcribed mRNA catabolic process, nonsense-mediated decay // not recorded//0006986 // i                                                                                                                   |               |
| 5232.082            | 6952.707            | NM_027878//XN_O  |               | 0.003 | 1.35 | <b>Dram1</b>                   | DNA-damage regulated autophagy modulator 1                                     | 0007010 // cytoskeleton organization // not recorded//0022604 // regulation of cell morphogenesis // not record                                                                                                                |               |
| 846.0644            | 1117.9769           | NM_001290676//NN |               | 0.001 | 1.35 | <b>Cpeb4</b>                   | cytoplasmic polyadenylation element binding protein 4                          | 0006810 // transport // inferred from electronic annotation//0006812 // cation transport // inferred from electro                                                                                                              |               |
| 18.109804           | 24.377796           | NM_011033        |               | 0.002 | 1.35 | <b>Pabpc2</b>                  | poly(A) binding protein, cytoplasmic 2                                         | 0000413 // protein peptidyl-prolyl isomerization // inferred from electronic annotation//0006457 // protein foldin                                                                                                             |               |
| 662.10724           | 877.84503           | NM_026573//XN_O  |               | 0.004 | 1.35 | <b>Upf3b</b>                   | UPF3 regulator of nonsense transcripts homolog B (yeast)                       | 0006810 // transport // inferred from electronic annotation                                                                                                                                                                    |               |
| 178.81508           | 245.7998            | NM_001099319//NN |               | 0.001 | 1.35 | <b>Gm12942//Zmyhm6</b>         | predicted gene 12942//zinc finger, MYM-type 6                                  | 0006397 // mRNA processing // inferred from electronic annotation//0010923 // negative regulation of phosphat                                                                                                                  |               |
| 832.45593           | 1097.4224           | NM_001038999//NN |               | 0.002 | 1.35 | <b>Atp8a1</b>                  | ATPase, aminophospholipid transporter (APLT), class I, type 8A, member 1       | 0000122 // negative regulation of transcription from RNA polymerase II promoter // inferred from mutant phenoty                                                                                                                |               |
| 584.45013           | 775.4994            | NM_011240        |               | 0.001 | 1.35 | <b>Ranbp2</b>                  | RAN binding protein 2                                                          |                                                                                                                                                                                                                                |               |
| 271.43558           | 365.693             | NM_146013//XN_O  |               | 0.003 | 1.35 | <b>Sec14a</b>                  | SEC14-like 4 (S. cerevisiae)                                                   |                                                                                                                                                                                                                                |               |
| 216.18271           | 293.67044           | NR_040628//NM_13 |               | 0.001 | 1.35 | <b>Gm17066//Rbm26</b>          | predicted gene 17066//RNA binding motif protein 26                             |                                                                                                                                                                                                                                |               |
| 1014.3445           | 1326.374            | NM_010207//NM_2  |               | 0.007 | 1.35 | <b>Fgfr2</b>                   | fibroblast growth factor receptor 2                                            |                                                                                                                                                                                                                                |               |

| [Nrf2-KO, Air, PBS] | [Nrf2-KO, Air, SFN] | RefSeq       | Transcript ID | p     | FC   | PBS:SFN | Gene Symbol      | Gene Title                                                                                                                                     | Gene Ontology                                                                                                  |
|---------------------|---------------------|--------------|---------------|-------|------|---------|------------------|------------------------------------------------------------------------------------------------------------------------------------------------|----------------------------------------------------------------------------------------------------------------|
| 472.12253           | 631.63904           | NM_001288625 | ///NM         | 0.005 | 1.34 |         | <b>Arid3a</b>    | AT rich interactive domain 3A (BRIGHT-like)                                                                                                    | 0006351 // transcription, DNA-templated // inferred from electronic annotation                                 |
| 917.3113            | 1203.6443           | NM_0011436   | ///NM         | 0.001 | 1.34 |         | <b>Sor1</b>      | soritin-related receptor, LDLR class A repeats-containing                                                                                      | 0000042 // protein targeting to Golgi // not recorded                                                          |
| 488.9552            | 653.52966           | NM_001122675 | ///NM         | 0.001 | 1.34 |         | <b>Zcchc2</b>    | zinc finger, CCHC domain containing 2                                                                                                          | 0007154 // cell communication // inferred from electronic annotation                                           |
| 1314.8274           | 1714.4128           | NM_010664    | ///XM_O       | 0.009 | 1.34 |         | <b>Krt18</b>     | keratin 18                                                                                                                                     | 0033209 // tumor necrosis factor-mediated signaling pathway // inferred from genetic interaction               |
| 433.61078           | 571.9356            | NM_025845    | ///XM_O       | 0.004 | 1.33 |         | <b>Prpf38b</b>   | PRP38 pre-mRNA processing factor 38 (yeast) domain containing B                                                                                | 0006397 // mRNA processing // inferred from electronic annotation                                              |
| 298.26135           | 394.98712           | NM_0011814   | ///NM         | 0.001 | 1.33 |         | <b>Fxr2</b>      | fragile X mental retardation, autosomal homolog 2                                                                                              | 0003723 // RNA binding // inferred from electronic annotation                                                  |
| 2606.6987           | 3370.1484           | NM_001199136 | ///NM         | 0.001 | 1.33 |         | <b>Macf1</b>     | microtubule-actin crosslinking factor 1                                                                                                        | 0001707 // mesoderm formation // inferred from mutant phenotype                                                |
| 10575.217           | 13705.487           | NM_011402    | ///XM_O       | 0.003 | 1.33 |         | <b>Slc34a2</b>   | solute carrier family 34 (sodium phosphate), member 2                                                                                          | 0001701 // in utero embryonic development // inferred from mutant phenotype                                    |
| 35.97612            | 49.56613            | NM_153529    | ///XM_O       | 0.008 | 1.33 |         | <b>Nrn1</b>      | neurtin 1                                                                                                                                      | 0007399 // nervous system development // not recorded                                                          |
| 396.4879            | 520.0435            |              |               | 0.004 | 1.33 |         | <b>AK077428</b>  | Mus musculus 8 days embryo whole body cDNA, RIKEN full-length enriched library, clone:5730407P16 product:unclassifiable, full insert sequence. |                                                                                                                |
| 233.65855           | 311.17303           | NM_001271587 | ///NM         | 0.002 | 1.33 |         | <b>Eps8</b>      | epidermal growth factor receptor pathway substrate 8                                                                                           | 0008344 // adult locomotory behavior // inferred from mutant phenotype                                         |
| 301.84064           | 398.9988            | NM_001165997 | ///NM         | 0.002 | 1.33 |         | <b>Spopl</b>     | speckle-type POZ protein-like                                                                                                                  | 0016567 // protein ubiquitination // inferred from electronic annotation                                       |
| 609.439             | 790.1372            | NM_001289690 | ///NM         | 0.004 | 1.33 |         | <b>Zfp740</b>    | zinc finger protein 740                                                                                                                        | 0006351 // transcription, DNA-templated // inferred from electronic annotation                                 |
| 180.18382           | 242.82791           | NM_009343    | ///XM_O       | 0.003 | 1.33 |         | <b>Phf1</b>      | PHD finger protein 1                                                                                                                           | 0006351 // transcription, DNA-templated // inferred from electronic annotation                                 |
| 609.3109            | 791.4686            | NM_134115    | ///XM_O       | 0.005 | 1.33 |         | <b>Stk38</b>     | serine/threonine kinase 38                                                                                                                     | 0006464 // cellular protein modification process // not recorded                                               |
| 424.4299            | 556.1001            | NM_011207    | ///XM_O       | 0.007 | 1.32 |         | <b>Ptpn3</b>     | protein tyrosine phosphatase, non-receptor type 3                                                                                              | 0006470 // protein dephosphorylation // not recorded                                                           |
| 197.18408           | 264.76764           | NM_030014    | ///XM_O       | 0.003 | 1.32 |         | <b>Hook1</b>     | hook homolog 1 (Drosophila)                                                                                                                    | 0006810 // transport // inferred from electronic annotation                                                    |
| 376.61676           | 493.999             | NM_001031814 | ///NM         | 0.002 | 1.32 |         | <b>Smg1</b>      | SMG1 homolog, phosphatidylinositol 3-kinase-related kinase (C. elegans)                                                                        | 0000184 // nuclear-transcribed mRNA catabolic process, nonsense-mediated decay // not recorded                 |
| 688.90015           | 888.1753            | NM_176836    | ///XM_O       | 0.006 | 1.32 |         | <b>Fam76b</b>    | family with sequence similarity 76, member B                                                                                                   | 0005634 // nucleus // not recorded                                                                             |
| 838.38586           | 1082.0266           | NM_008551    | ///NM         | 0.002 | 1.32 |         | <b>Mapkapk2</b>  | MAP kinase-activated protein kinase 2                                                                                                          | 0002224 // toll-like receptor signaling pathway // inferred from mutant phenotype                              |
| 332.17795           | 435.83673           | NM_144916    | ///NM         | 0.007 | 1.32 |         | <b>Tmem150a</b>  | transmembrane protein 150A                                                                                                                     | 0009056 // catabolic process // inferred from electronic annotation                                            |
| 200.45071           | 267.08893           | NM_025806    | ///XM_O       | 0.010 | 1.32 |         | <b>Pibd1</b>     | phospholipase B domain containing 1                                                                                                            | 0006629 // lipid metabolic process // inferred from electronic annotation                                      |
| 585.27673           | 757.1203            | NR_045008    | ///NM         | 0.005 | 1.32 |         | <b>Gm20300</b>   | predicted gene, 20300                                                                                                                          |                                                                                                                |
| 418.44238           | 546.31775           | NM_019776    | ///XM_O       | 0.003 | 1.32 |         | <b>Snd1</b>      | staphylococcal nuclease and tudor domain containing 1                                                                                          | 0001649 // osteoblast differentiation // not recorded                                                          |
| 33.39544            | 45.240223           | NM_170671    | ///XM_O       | 0.001 | 1.32 |         | <b>Mycbpap</b>   | MYCBP associated protein                                                                                                                       | 0006897 // endocytosis // inferred from electronic annotation                                                  |
| 28.863644           | 38.33517            | NM_001293795 | ///NM         | 0.001 | 1.32 |         | <b>Tm6sf2</b>    | transmembrane 6 superfamily member 2                                                                                                           | 0016020 // membrane // inferred from electronic annotation                                                     |
| 261.2709            | 342.62677           | NM_001163766 | ///NM         | 0.003 | 1.31 |         | <b>Wdr90</b>     | WD repeat domain 90                                                                                                                            | 0005515 // protein binding // inferred from electronic annotation                                              |
| 275.40002           | 361.2524            | NM_001271358 | ///NM         | 0.004 | 1.31 |         | <b>Arrb2</b>     | arrestin, beta 2                                                                                                                               | 0001932 // regulation of protein phosphorylation // inferred from direct assay                                 |
| 800.39984           | 1029.9666           | NM_009427    | ///NM         | 0.004 | 1.31 |         | <b>Tob1</b>      | transducer of ErbB-2.1                                                                                                                         | 0007184 // SMAD protein import into nucleus // inferred from direct assay                                      |
| 1727.8665           | 2195.1538           | NM_176849    | ///XM_O       | 0.002 | 1.31 |         | <b>Arglu1</b>    | arginine and glutamate rich 1                                                                                                                  | 0005515 // protein binding // inferred from electronic annotation                                              |
| 386.68106           | 502.51056           | NM_001013414 | ///NM         | 0.009 | 1.31 |         | <b>Neurl4</b>    | neurallized homolog 4 (Drosophila)                                                                                                             | 0005737 // cytoplasm // inferred from electronic annotation                                                    |
| 1565.5444           | 2000.6212           | NM_001293667 | ///NM         | 0.003 | 1.31 |         | <b>Atp11a</b>    | ATPase, class VI, type 11A                                                                                                                     | 0006810 // transport // inferred from electronic annotation                                                    |
| 169.2596            | 226.04684           | NM_001162945 | ///XA         | 0.004 | 1.31 |         | <b>Mtx3</b>      | metaxin 3                                                                                                                                      | 0006626 // protein targeting to mitochondrion // inferred from electronic annotation                           |
| 39.551662           | 54.26534            |              |               | 0.005 | 1.31 |         | <b>Dnmbp</b>     | Mus musculus dynamin binding protein (Dnmbp), mRNA.                                                                                            |                                                                                                                |
| 383.36273           | 497.33185           | NM_001081151 | ///NM         | 0.005 | 1.31 |         | <b>Gan</b>       | giant axonal neuropathy                                                                                                                        | 0007010 // cytoskeleton organization // not recorded                                                           |
| 23.972837           | 31.475975           | NM_001042767 | ///NM         | 0.006 | 1.31 |         | <b>Proc</b>      | protein C                                                                                                                                      | 0006508 // proteolysis // inferred from direct assay                                                           |
| 2014.5023           | 2557.106            | NM_013605    | ///NM         | 0.005 | 1.31 |         | <b>Muc1</b>      | mucin 1, transmembrane                                                                                                                         | 0001666 // response to hypoxia // inferred from electronic annotation                                          |
| 394.33856           | 510.55887           | NM_001025307 | ///NM         | 0.005 | 1.31 |         | <b>Stx3</b>      | syntaxin 3                                                                                                                                     | 0006810 // transport // inferred from electronic annotation                                                    |
| 439.56625           | 569.4507            | NM_018824    | ///XM_O       | 0.005 | 1.30 |         | <b>Slc23a2</b>   | solute carrier family 23 (nucleobase transporters), member 2                                                                                   | 0006810 // transport // inferred from electronic annotation                                                    |
| 437.76752           | 566.42926           | NM_153177    | ///XM_O       | 0.007 | 1.30 |         | <b>Ago4</b>      | argonaute RISC catalytic subunit 4                                                                                                             | 0006402 // mRNA catabolic process // not recorded                                                              |
| 3274.0938           | 4193.465            | NM_009864    | ///NM         | 0.006 | 1.30 |         | <b>Cdh1</b>      | cadherin 1                                                                                                                                     | 0001701 // in utero embryonic development // inferred from mutant phenotype                                    |
| 12.587478           | 16.356964           | NM_007769    | ///XM_O       | 0.007 | 1.30 |         | <b>Dmbt1</b>     | deleted in malignant brain tumors 1                                                                                                            | 0001824 // blastocyst development // inferred from mutant phenotype                                            |
| 459.502             | 594.1198            | NM_001197046 | ///NM         | 0.006 | 1.30 |         | <b>Gfgr1op</b>   | Fgfr1 oncogene partner                                                                                                                         | 0006469 // negative regulation of protein kinase activity // not recorded                                      |
| 661.6627            | 842.575             | NM_001025250 | ///NM         | 0.004 | 1.30 |         | <b>Vegfa</b>     | vascular endothelial growth factor A                                                                                                           | 0000122 // negative regulation of transcription from RNA polymerase II promoter // not recorded                |
| 728.02295           | 924.3662            | NM_172645    | ///XM_O       | 0.002 | 1.30 |         | <b>Suca</b>      | SUN domain containing ossification factor                                                                                                      | 0001503 // ossification // inferred from electronic annotation                                                 |
| 265.25412           | 344.7731            | NM_009201    | ///XM_O       | 0.003 | 1.30 |         | <b>Slc1a5</b>    | solute carrier family 1 (neutral amino acid transporter), member 5                                                                             | 0003333 // amino acid transmembrane transport // inferred from direct assay                                    |
| 346.88977           | 448.51886           | NM_133921    | ///XM_O       | 0.008 | 1.30 |         | <b>Nfya1</b>     | nuclear transcription factor, X-box binding-like 1                                                                                             | 0006355 // regulation of transcription, DNA-templated // inferred from electronic annotation                   |
| 37.38658            | 50.13584            | NM_013486    | ///XM_O       | 0.006 | 1.30 |         | <b>Cd2</b>       | CD2 antigen                                                                                                                                    | 0007155 // cell adhesion // inferred from electronic annotation                                                |
| 1231.9764           | 1553.1554           | NM_008986    | ///NM         | 0.008 | 1.30 |         | <b>Ptfr</b>      | polymerase I and transcript release factor                                                                                                     | 0006351 // transcription, DNA-templated // inferred from electronic annotation                                 |
| 516.6606            | 665.30255           | NM_153056    | ///XM_O       | 0.003 | 1.30 |         | <b>Sirt7</b>     | sirtuin 7                                                                                                                                      | 0000122 // negative regulation of transcription from RNA polymerase II promoter // not recorded                |
| 2233.261            | 2811.2349           | NM_009170    | ///XM_O       | 0.002 | 1.30 |         | <b>Shh</b>       | sonic hedgehog                                                                                                                                 | 0000122 // negative regulation of transcription from RNA polymerase II promoter // inferred from direct assay  |
| 278.69446           | 360.3511            | NM_145151    | ///NR_O       | 0.004 | 1.30 |         | <b>Crebzf</b>    | CREB/ATF bZIP transcription factor                                                                                                             | 0006351 // transcription, DNA-templated // not recorded                                                        |
| 139.60599           | 186.0955            | NM_177372    | ///XR_38      | 0.005 | 1.29 |         | <b>Dna2</b>      | DNA replication helicase 2 homolog (yeast)                                                                                                     | 0000076 // DNA replication checkpoint // not recorded                                                          |
| 3971.3213           | 5054.2412           | NM_139149    | ///XM_O       | 0.003 | 1.29 |         | <b>Fus</b>       | fused in sarcoma                                                                                                                               | 0000166 // nucleotide binding // inferred from electronic annotation                                           |
| 695.9025            | 879.6022            | NM_019774    | ///XM_O       | 0.003 | 1.29 |         | <b>Akap8</b>     | A kinase (PRKA) anchor protein 8                                                                                                               | 0007076 // mitotic chromosome condensation // inferred from direct assay                                       |
| 233.93326           | 304.2318            | NM_177806    | ///XM_O       | 0.008 | 1.29 |         | <b>Prpf39</b>    | PRP39 pre-mRNA processing factor 39 homolog (yeast)                                                                                            | 0006396 // RNA processing // inferred from electronic annotation                                               |
| 470.99567           | 603.21295           | NM_001005507 | ///NM         | 0.004 | 1.29 |         | <b>Smg7</b>      | Smg-7 homolog, nonsense mediated mRNA decay factor (C. elegans)                                                                                | 0000184 // nuclear-transcribed mRNA catabolic process, nonsense-mediated decay // inferred from electronic ann |
| 730.8331            | 919.7546            | NM_001160319 | ///NM         | 0.002 | 1.29 |         | <b>Ubr4</b>      | ubiquitin protein ligase E3 component n-recognin 4                                                                                             | 0001657 // protein ubiquitination // inferred from electronic annotation                                       |
| 191.96724           | 251.37547           | NM_146222    | ///XM_O       | 0.004 | 1.29 |         | <b>Msantd2</b>   | Myb/SANT-like DNA-binding domain containing 2                                                                                                  |                                                                                                                |
| 648.00916           | 814.9779            | NM_00115130  | ///NM         | 0.001 | 1.29 |         | <b>Zbtb44</b>    | zinc finger and BTB domain containing 44                                                                                                       |                                                                                                                |
| 1493.5106           | 1867.6942           | NM_001039581 | ///NM         | 0.003 | 1.28 |         | <b>Abca3</b>     | ATP-binding cassette, sub-family A (ABC1), member 3                                                                                            |                                                                                                                |
| 1055.8202           | 1326.7117           | NM_001159963 | ///NM         | 0.002 | 1.28 |         | <b>Fbx15</b>     | F-box and leucine-rich repeat protein 5                                                                                                        |                                                                                                                |
| 146.54016           | 193.85947           | NM_207202    | ///NM         | 0.003 | 1.28 |         | <b>Cdc4120</b>   | coiled-coil domain containing 120                                                                                                              |                                                                                                                |
| 2566.4402           | 3209.8403           | NM_026499    | ///NM         | 0.004 | 1.28 |         | <b>Srsf6</b>     | serine/arginine-rich splicing factor 6                                                                                                         |                                                                                                                |
| 74.15291            | 101.289955          | NR_028380    | ///NR_O2      | 0.008 | 1.28 |         | <b>Ftx</b>       | Ftx transcript, Xist regulator (non-protein coding)                                                                                            |                                                                                                                |
| 1120.0303           | 1391.6128           | NM_008532    | ///NM         | 0.003 | 1.28 |         | <b>Epcam</b>     | epithelial cell adhesion molecule                                                                                                              |                                                                                                                |
| 903.1811            | 1124.0533           | NM_173378    | ///NM         | 0.005 | 1.27 |         | <b>Tp53bp2</b>   | transformation related protein 53 binding protein 2                                                                                            |                                                                                                                |
| 534.7251            | 676.7039            | NM_007651    | ///NM         | 0.006 | 1.27 |         | <b>Cd53</b>      | CD53 antigen                                                                                                                                   |                                                                                                                |
| 167.33719           | 217.21092           | NM_001168290 | ///NM         | 0.009 | 1.27 |         | <b>Supg2</b>     | SURP and G patch domain containing 2                                                                                                           |                                                                                                                |
| 219.17746           | 281.06815           | NM_178601    | ///XR_10      | 0.009 | 1.27 |         | <b>D1Ert448e</b> | DNA segment, Chr 1, ERATO Doi 448, expressed                                                                                                   | 0006397 // mRNA processing // inferred from                                                                    |
| 1251.5516           | 1546.7518           | NM_001034851 | ///NM         | 0.005 | 1.27 |         | <b>Fam134b</b>   | family with sequence similarity 134, member B                                                                                                  | 0006364 // rRNA processing // traceable author statement                                                       |
|                     |                     |              |               |       |      |         |                  | 00019233 // sensory perception of pain // not recorded                                                                                         |                                                                                                                |

| [Nrf2-KO, Air, PBS] | [Nrf2-KO, Air, SFN] | RefSeq       | Transcript ID | p     | FC    | PBS:SFN | Gene Symbol    | Gene Title                                                                    | Gene Ontology                                                                                                                                                                   |
|---------------------|---------------------|--------------|---------------|-------|-------|---------|----------------|-------------------------------------------------------------------------------|---------------------------------------------------------------------------------------------------------------------------------------------------------------------------------|
| 411.46655           | 516.79956           | NM_001205353 | ///NM         | 0.003 | 1.27  |         | <b>Gramd4</b>  | GRAM domain containing 4                                                      | 0006915 // apoptotic process // inferred from electronic annotation                                                                                                             |
| 608.4214            | 758.4442            | NM_007462    | ///XM_O       | 0.009 | 1.27  |         | <b>Apc</b>     | adenomatosis polyposis coli                                                   | 0000281 // mitotic cytokinesis // inferred from mutant phenotype//0000281 // mitotic cytokinesis // not recorded                                                                |
| 565.25287           | 706.62305           | NM_027349    | ///XM_O       | 0.005 | 1.27  |         | <b>Rbm25</b>   | RNA binding motif protein 25                                                  | 0000381 // regulation of alternative mRNA splicing, via spliceosome // inferred from electronic annotation//0000381 // regulation of alternative mRNA splicing, via spliceosome |
| 399.18823           | 500.93253           | NM_153790    | ///XM_O       | 0.006 | 1.27  |         | <b>Scarf2</b>  | scavenger receptor class F, member 2                                          | 0006898 // receptor-mediated endocytosis // inferred from direct assay//0007155 // cell adhesion // inferred from                                                               |
| 2450.2734           | 3027.0522           | NM_001145824 | ///NM         | 0.005 | 1.27  |         | <b>Hipk3</b>   | homeodomain interacting protein kinase 3                                      | 0000122 // negative regulation of transcription from RNA polymerase II promoter // inferred from sequence or str                                                                |
| 1519.6454           | 1867.6646           | NM_008149    | ///XM_O       | 0.005 | 1.27  |         | <b>Gpam</b>    | glycerol-3-phosphate acyltransferase, mitochondrial                           | 0006629 // lipid metabolic process // inferred from electronic annotation//0006631 // fatty acid metabolic proces                                                               |
| 518.90076           | 652.2919            | NM_001081171 | ///XM         | 0.006 | 1.27  |         | <b>Lama5</b>   | laminin, alpha 5                                                              | 0001658 // branching involved in ureteric bud morphogenesis // inferred from mutant phenotype//0001738 // m                                                                     |
| 746.5401            | 925.05383           | NM_001081039 | ///NM         | 0.005 | 1.26  |         | <b>Dock9</b>   | dedicator of cytokinesis 9                                                    | 0007264 // small GTPase mediated signal transduction // inferred from electronic annotation//0032319 // regulat                                                                 |
| 24.511972           | 31.13356            | NM_001281955 | ///XM         | 0.005 | 1.26  |         | <b>Csmd2</b>   | CUB and Sushi multiple domains 2                                              |                                                                                                                                                                                 |
| 535.93176           | 671.21704           | NM_001081150 |               | 0.006 | 1.26  |         | <b>Lonrf1</b>  | LON peptidase N-terminal domain and ring finger 1                             | 0006200 // ATP catabolic process // inferred from electronic annotation//0006508 // proteolysis // inferred from                                                                |
| 704.786             | 870.77216           | NM_144925    | ///XM_O       | 0.010 | 1.26  |         | <b>Tnrc6a</b>  | trinucleotide repeat containing 6a                                            | 0006417 // regulation of translation // inferred from electronic annotation//0009267 // cellular response to starv.                                                             |
| 412.89673           | 516.568             | NM_001045523 | ///XM         | 0.010 | 1.26  |         | <b>Bahd1</b>   | bromo adjacent homology domain containing 1                                   | 0006351 // transcription, DNA-templated // inferred from electronic annotation//0006355 // regulation of transcr                                                                |
| 4610.6074           | 5672.172            | NM_001081286 | ///XM         | 0.003 | 1.26  |         | <b>Fat1</b>    | FAT tumor suppressor homolog 1 (Drosophila)                                   | 0007015 // actin filament organization // inferred from mutant phenotype//0007155 // cell adhesion // inferred f                                                                |
| 1721.9828           | 2111.8345           | NM_001025387 | ///NM         | 0.010 | 1.26  |         | <b>Brd2</b>    | bromodomain containing 2                                                      | 0006334 // nucleosome assembly // not recorded//0006351 // transcription, DNA-templated // inferred from elec                                                                   |
| 204.48326           | 260.37762           | NM_001136088 | ///NM         | 0.008 | 1.26  |         | <b>Sh3bp2</b>  | SH3-domain binding protein 2                                                  | 0005515 // protein binding // inferred from physical interaction//0005543 // phospholipid binding // inferred fror                                                              |
| 395.9646            | 493.76358           | NM_001045529 | ///XM         | 0.008 | 1.26  |         | <b>Morc3</b>   | microchidia 3                                                                 | 0006468 // protein phosphorylation // not recorded//0007569 // cell aging // not recorded//0009791 // post-en                                                                   |
| 580.33966           | 720.61646           | NM_0018759   | ///NR_O       | 0.002 | 1.26  |         | <b>Zfp326</b>  | zinc finger protein 326                                                       | 0006351 // transcription, DNA-templated // inferred from electronic annotation//0006355 // regulation of transcr                                                                |
| 418.92673           | 522.90533           | NM_133829    | ///NM_1       | 0.009 | 1.26  |         | <b>Mfsd6</b>   | major facilitator superfamily domain containing 6                             | 0002376 // immune system process // inferred from electronic annotation//0055085 // transmembrane transport                                                                     |
| 587.98303           | 728.3994            | NM_001145813 | ///NM         | 0.009 | 1.26  |         | <b>Elf5</b>    | E74-like factor 5                                                             | 0006351 // transcription, DNA-templated // inferred from electronic annotation//0006355 // regulation of transcr                                                                |
| 138.86198           | 181.14723           | NM_133770    | ///XM_O       | 0.003 | 1.26  |         | <b>Adck4</b>   | aarF domain containing kinase 4                                               | 0006468 // protein phosphorylation // inferred from electronic annotation//0008152 // metabolic process // infe                                                                 |
| 280.98007           | 352.43027           | NM_001164184 | ///NM         | 0.004 | 1.26  |         | <b>Lsr</b>     | lipolysis stimulated lipoprotein receptor                                     | 0001889 // liver development // inferred from mutant phenotype//0006898 // receptor-mediated endocytosis //                                                                     |
| 487.2165            | 607.7341            | NM_017463    |               | 0.004 | 1.26  |         | <b>Pbx2</b>    | pre B cell leukemia homeobox 2                                                | 0006351 // transcription, DNA-templated // inferred from electronic annotation//0006355 // regulation of transcr                                                                |
| 667.5678            | 820.72095           | NM_001285870 | ///NM         | 0.008 | 1.26  |         | <b>Trim3</b>   | tripartite motif-containing 3                                                 | 0006810 // transport // inferred from electronic annotation//0015031 // protein transport // inferred from electr                                                               |
| 1311.7941           | 1596.239            | NM_001287180 | ///NM         | 0.006 | 1.26  |         | <b>Atf4</b>    | activating transcription factor 4                                             | 0006094 // gluconeogenesis // inferred from direct assay//0006351 // transcription, DNA-templated // inferred fr                                                                |
| 329.62616           | 411.33902           | NM_080553    | ///XM_O       | 0.004 | 1.25  |         | <b>Itp3</b>    | inositol 1,4,5-triphosphate receptor 3                                        | 0006810 // transport // inferred from electronic annotation//0006811 // ion transport // inferred from electronic                                                               |
| 382.41815           | 478.77054           | NM_001166648 | ///NM         | 0.008 | 1.25  |         | <b>Zfp280c</b> | zinc finger protein 280C                                                      | 0006351 // transcription, DNA-templated // inferred from electronic annotation//0006355 // regulation of transcr                                                                |
| 1088.8774           | 1335.6722           | NM_001217599 | ///NM         | 0.009 | 1.25  |         | <b>Sort1</b>   | sortilin 1                                                                    | 0001503 // ossification // inferred from electronic annotation//0006810 // transport // inferred from electronic a                                                              |
| 500.95636           | 622.4535            | NM_001146176 | ///NM         | 0.010 | 1.25  |         | <b>Max</b>     | Max protein                                                                   | 0006351 // transcription, DNA-templated // inferred from electronic annotation//0006355 // regulation of transcr                                                                |
| 233.95839           | 295.29355           | NM_026888    | ///XM_O       | 0.005 | 1.25  |         | <b>Phkg2</b>   | phosphorylase kinase, gamma 2 (testis)                                        | 0005975 // carbohydrate metabolic process // inferred from electronic annotation//0005977 // glycogen metabol                                                                   |
| 356.93933           | 445.84897           | NM_001081049 | ///XM         | 0.003 | 1.25  |         | <b>Kmt2a</b>   | lysine (K)-specific methyltransferase 2A                                      | 0006306 // DNA methylation // inferred from mutant phenotype//0006351 // transcription, DNA-templated // inf                                                                    |
| 731.56586           | 895.31793           | NM_010690    | ///XM_O       | 0.009 | 1.25  |         | <b>Lats1</b>   | large tumor suppressor                                                        | 0000086 // G2/M transition of mitotic cell cycle // not recorded//0000819 // sister chromatid segregation // not r                                                              |
| 380.66827           | 473.32748           | NM_172652    | ///XM_O       | 0.004 | 1.25  |         | <b>Kansl3</b>  | KAT8 regulatory NSL complex subunit 3                                         | 0016568 // chromatin modification // inferred from electronic annotation//0043981 // histone H4-K5 acetylation                                                                  |
| 626.3747            | 766.0071            | NM_144837    | ///XM_O       | 0.008 | 1.25  |         | <b>Ice1</b>    | interactor of little elongation complex ELL subunit 1                         |                                                                                                                                                                                 |
| 727.53564           | 891.14105           | NM_172866    | ///XM_O       | 0.003 | 1.25  |         | <b>Rgp1</b>    | RGP1 retrograde golgi transport homolog (S. cerevisiae)                       |                                                                                                                                                                                 |
| 1297.6232           | 1574.0868           | NM_177301    | ///XM_O       | 0.006 | 1.25  |         | <b>Hnrnp1</b>  | heterogeneous nuclear ribonucleoprotein L                                     | 0006397 // mRNA processing // inferred from electronic annotation                                                                                                               |
| 1788.1697           | 2166.5437           | NM_011519    | ///XM_O       | 0.004 | 1.25  |         | <b>Sdc1</b>    | syndecan 1                                                                    | 0001657 // ureteric bud development // inferred from electronic annotation//0006954 // inflammatory response                                                                    |
| 205.466             | 259.38693           | NM_009886    | ///XM_O       | 0.008 | 1.25  |         | <b>Celsr1</b>  | cadherin, EGF LAG seven-pass G-type receptor 1 (flamingo homolog, Drosophila) | 0001702 // gastrulation with mouth forming second // non-traceable author statement//0001736 // establishmer                                                                    |
| 321.0384            | 396.3768            | NM_009461    | ///XM_O       | 0.004 | 1.24  |         | <b>Ubr1</b>    | ubiquitin protein ligase E3 component n-recogin 1                             | 0006511 // ubiquitin-dependent protein catabolic process // inferred from direct assay//0006511 // ubiquitin-dep                                                                |
| 1534.4547           | 1861.2865           | NM_178920    |               | 0.006 | 1.24  |         | <b>Mal2</b>    | mal, T cell differentiation protein 2                                         | 0005515 // protein binding // inferred from electronic annotation                                                                                                               |
| 254.1309            | 316.2108            | NM_023229    | ///XM_O       | 0.010 | 1.24  |         | <b>Fastk</b>   | Fas-activated serine/threonine kinase                                         | 0006468 // protein phosphorylation // not recorded//0006915 // apoptotic process // inferred from electronic an                                                                 |
| 264.01752           | 328.5755            | NM_001253752 | ///NM         | 0.004 | 1.24  |         | <b>Zmym5</b>   | zinc finger, MYM-type 5                                                       | 0008270 // zinc ion binding // inferred from electronic annotation//0046872 // metal ion binding // inferred from                                                               |
| 810.8788            | 977.0885            | NM_010585    | ///XM_O       | 0.006 | 1.24  |         | <b>Itp1</b>    | inositol 1,4,5-trisphosphate receptor 1                                       | 0001666 // response to hypoxia // inferred from direct assay//0001666 // response to hypoxia // not recorded//                                                                  |
| 506.74896           | 623.7485            | NM_029868    | ///XM_O       | 0.008 | 1.24  |         | <b>Gpbp11</b>  | GC-rich promoter binding protein 1-like 1                                     | 0006351 // transcription, DNA-templated // inferred from electronic annotation//0006355 // regulation of transcr                                                                |
| 399.1241            | 491.10736           | NM_001290783 | ///NM         | 0.006 | 1.24  |         | <b>Wdr13</b>   | WD repeat domain 13                                                           | 0005515 // protein binding // inferred from electronic annotation                                                                                                               |
| 296.8177            | 365.09445           | NM_001289429 | ///NM         | 0.007 | 1.23  |         | <b>Cipc</b>    | CLOCK interacting protein, circadian                                          | 0006351 // transcription, DNA-templated // inferred from electronic annotation//0006355 // regulation of transcr                                                                |
| 345.6085            | 423.71396           | NM_201362    | ///XM_O       | 0.008 | 1.23  |         | <b>Ccdc68</b>  | coiled-coil domain containing 68                                              |                                                                                                                                                                                 |
| 3586.9675           | 4410.366            | NM_007569    |               | 0.008 | 1.23  |         | <b>Btg1</b>    | B cell translocation gene 1, anti-proliferative                               | 0006479 // protein methylation // inferred from direct assay//0006979 // response to oxidative stress // inferred                                                               |
| 91.4678             | 119.54797           | NM_001163749 | ///NM         | 0.006 | 1.23  |         | <b>Camsap3</b> | calmodulin regulated spectrin-associated protein family, member 3             | 0000226 // microtubule cytoskeleton organization // not recorded//0010923 // negative regulation of phosphata:                                                                  |
| 1254.9084           | 1502.8506           | NM_001164503 | ///XM         | 0.010 | 1.23  |         | <b>Akap11</b>  | A kinase (PRKA) anchor protein 11                                             | 0010738 // regulation of protein kinase A signaling // not recorded//0042325 // regulation of phosphorylation // i                                                              |
| 411.1055            | 502.8651            | NM_133757    | ///XM_O       | 0.009 | 1.23  |         | <b>Pgs1</b>    | phosphatidylglycerophosphate synthase 1                                       | 0006629 // lipid metabolic process // inferred from electronic annotation//0006655 // phosphatidylglycerol biosy                                                                |
| 541.69824           | 660.2406            | NM_001173547 | ///NM         | 0.008 | 1.23  |         | <b>Taz</b>     | tafazzin                                                                      | 0006936 // muscle contraction // not recorded//0007507 // heart development // not recorded//0007519 // ske                                                                     |
| 317.12598           | 388.85678           | NM_198170    | ///XM_O       | 0.009 | 1.23  |         | <b>Szt2</b>    | seizure threshold 2                                                           | 0007417 // central nervous system development // inferred from mutant phenotype//0009790 // embryo develop                                                                      |
| 1376.9081           | 1637.7526           | NM_021604    | ///XM_O       | 0.010 | 1.23  |         | <b>Agrn</b>    | agrin                                                                         | 0001932 // regulation of protein phosphorylation // not recorded//0001934 // positive regulation of protein phos                                                                |
| 213.4828            | 264.86884           | NM_028047    | ///XM_O       | 0.010 | 1.23  |         | <b>Smg9</b>    | smg-9 homolog, nonsense mediated mRNA decay factor (C. elegans)               | 0000184 // nuclear-transcribed mRNA catabolic process, nonsense-mediated decay // not recorded                                                                                  |
| 409.05075           | 497.6229            | NM_018748    | ///XM_O       | 0.008 | 1.22  |         | <b>Golga4</b>  | golgi autoantigen, golgin subfamily a, 4                                      | 0000042 // protein targeting to Golgi // inferred from electronic annotation//0006355 // regulation of transcripti                                                              |
| 2219.8306           | 2625.3403           | NM_001146120 | ///NM         | 0.007 | 1.22  |         | <b>Psp</b>     | prosaposin                                                                    | 0006629 // lipid metabolic process // inferred from electronic annotation//0006665 // sphingolipid metabolic pro                                                                |
| 927.72565           | 1105.54             | NM_001040459 | ///XM         | 0.006 | 1.22  |         | <b>Shroom4</b> | shroom family member 4                                                        | 0000902 // cell morphogenesis // inferred from sequence or structural similarity//0007015 // actin filament orga                                                                |
| 6579.4795           | 7937.7295           | NM_001171034 | ///NM         | 0.009 | 1.22  |         | <b>Tmbim6</b>  | transmembrane BAX inhibitor motif containing 6                                | 0006915 // apoptotic process // inferred from electronic annotation//0006986 // response to unfolded protein //                                                                 |
| 740.0734            | 880.781             | NM_009796    | ///XM_O       | 0.009 | 1.22  |         | <b>Capn7</b>   | calpain 7                                                                     | 0006508 // proteolysis // not recorded//0010634 // positive regulation of epithelial cell migration // not recorded                                                             |
| 830.67487           | 984.8433            | NM_001276292 | ///NM         | 0.008 | 1.22  |         | <b>Wwp1</b>    | WW domain containing E3 ubiquitin protein ligase 1                            | 0016567 // protein ubiquitination // inferred from direct assay//0016567 // protein ubiquitination // traceable au                                                              |
| 18.76382            | 22.56707            | NM_146086    | ///XM_O       | 0.006 | 1.21  |         | <b>Pde6a</b>   | phosphodiesterase 6A, cGMP-specific, rod, alpha                               | 0007165 // signal transduction // inferred from electronic annotation//0007601 // visual perception // inferred fr                                                              |
| 1052.1464           | 1251.0677           | NM_025611    |               | 0.009 | 1.21  |         | <b>Cul7</b>    | culin 7                                                                       | 0000226 // microtubule cytoskeleton organization // inferred from sequence or structural similarity//0000281 // i                                                               |
| 918.99493           | 1085.121            | NM_001290792 | ///NM         | 0.007 | 1.21  |         | <b>Wdr45</b>   | WD repeat domain 45                                                           | 0000045 // autophagic vacuole assembly // not recorded//0006914 // autophagy // not recorded//0050790 // r                                                                      |
| 2174.6592           | 2561.4438           | NM_144900    |               | 0.010 | 1.21  |         | <b>Atp1a1</b>  | ATPase, Na+/K+ transporting, alpha 1 polypeptide                              | 0002026 // regulation of the force of heart contraction // inferred from mutant phenotype//0002028 // regulatio                                                                 |
| 2213.297            | 2597.9736           | NM_206924    |               | 0.009 | 1.21  |         | <b>Jtb</b>     | jumping translocation breakpoint                                              | 0000910 // cytokinesis // not recorded//0006915 // apoptotic process // inferred from electronic annotation//00                                                                 |
| 232.40111           | 282.9332            | NM_001170433 | ///NM         | 0.007 | 1.21  |         | <b>Ppfjbp1</b> | PTPRF interacting protein, binding protein 1 (liprin beta 1)                  | 0005515 // protein binding // inferred from electronic annotation                                                                                                               |
| 523.5016            | 627.2216            | NM_001165894 | ///NM         | 0.006 | 1.21  |         | <b>Akt1</b>    | thymoma viral proto-oncogene 1                                                | 0000060 // protein import into nucleus, translocation // not recorded//0001649 // osteoblast differentiation // in                                                              |
| 342.91522           | 411.1354            | NM_001253885 | ///NM         | 0.009 | 1.21  |         | <b>Apbb1</b>   | amyloid beta (A4) precursor protein-binding, family B, member 1               | 0001764 // neuron migration // inferred from genetic interaction//0006302 // double-strand break repair // infer                                                                |
| 931.9625            | 1098.9344           | NM_011682    | ///XM_O       | 0.007 | 1.21  |         | <b>Utrn</b>    | utrophin                                                                      | 0001954 // positive regulation of cell-matrix adhesion // not recorded//0007527 // adult somatic muscle develop                                                                 |
| 694.9422            | 819.30725           | NM_001252326 | ///NM         | 0.010 | 1.21  |         | <b>Pan2</b>    | PAN2 polyA specific ribonuclease subunit homolog (S. cerevisiae)              | 0000184 // nuclear-transcribed mRNA catabolic process, nonsense-mediated decay // inferred from electronic ann                                                                  |
| 76.91728            | 68.19983            | NM_029182    |               | 0.008 | -1.19 |         | <b>Rasd2</b>   | RASD family, member 2                                                         | 0001963 // synaptic transmission, dopaminergic // inferred from mutant phenotype//0006184 // GTP catabolic pr                                                                   |



| [Nrf2-KO, Air, PBS] | [Nrf2-KO, Air, SFN] | RefSeq             | Transcript ID | p     | FC    | PBS:SFN | Gene Symbol            | Gene Title                                                                         | Gene Ontology                                                                                                                                                                                                                                               |
|---------------------|---------------------|--------------------|---------------|-------|-------|---------|------------------------|------------------------------------------------------------------------------------|-------------------------------------------------------------------------------------------------------------------------------------------------------------------------------------------------------------------------------------------------------------|
| 11392.251           | 9199.467            | NM_001077529///NM  |               | 0.009 | -1.20 |         | <b>Nme2</b>            | NME/NM23 nucleoside diphosphate kinase 2                                           | 0002762 // negative regulation of myeloid leukocyte differentiation // not recorded///0006165 // nucleoside diphosphate kinase activity                                                                                                                     |
| 1646.1176           | 1348.7761           | NM_001161724///NM  |               | 0.010 | -1.20 |         | <b>Ilk</b>             | integrin linked kinase                                                             | 0001558 // regulation of cell growth // not recorded///0001658 // branching involved in ureteric bud morphogenesis                                                                                                                                          |
| 205.99272           | 177.18608           | NM_001042556///NM  |               | 0.009 | -1.20 |         | <b>Rpf2</b>            | ribosome production factor 2 homolog (S. cerevisiae)                               | 0044822 // poly(A) RNA binding // not recorded                                                                                                                                                                                                              |
| 125.604965          | 111.07297           | NM_029101///XR_38  |               | 0.008 | -1.20 |         | <b>Rrp7a</b>           | ribosomal RNA processing 7 homolog A (S. cerevisiae)                               | 0000166 // nucleotide binding // inferred from electronic annotation///0003723 // RNA binding // inferred from electronic annotation                                                                                                                        |
| 48.495747           | 41.14084            | NM_008024          |               | 0.007 | -1.21 |         | <b>Foxl1</b>           | forkhead box L1                                                                    | 0000122 // negative regulation of transcription from RNA polymerase II promoter // --///0006351 // transcription, DNA-templated                                                                                                                             |
| 405.3909            | 335.4976            | NM_026062          |               | 0.009 | -1.21 |         | <b>Fam69a</b>          | family with sequence similarity 69, member A                                       | 0005515 // protein binding // inferred from physical interaction                                                                                                                                                                                            |
| 569.2749            | 467.8062            | NM_001024384///NM  |               | 0.008 | -1.21 |         | <b>Crfs1</b>           | cardiolipin synthase 1                                                             | 0006629 // lipid metabolic process // inferred from electronic annotation///0008654 // phospholipid biosynthetic process                                                                                                                                    |
| 421.15665           | 348.99915           | NM_153160///XM_0   |               | 0.010 | -1.21 |         | <b>Zcchc17</b>         | zinc finger, CCHC domain containing 17                                             | 0003676 // nucleic acid binding // inferred from electronic annotation///0003723 // RNA binding // traceable author statement                                                                                                                               |
| 238.09058           | 201.72334           | NM_001127338///NM  |               | 0.008 | -1.21 |         | <b>Aldh7a1</b>         | aldehyde dehydrogenase family 7, member A1                                         | 0008152 // metabolic process // inferred from electronic annotation///0019285 // glycine betaine biosynthetic process                                                                                                                                       |
| 112.27865           | 98.583206           | NM_027201///XM_0   |               | 0.010 | -1.21 |         | <b>Zfp511</b>          | zinc finger protein 511                                                            | 0006351 // transcription, DNA-templated // inferred from electronic annotation///0006355 // regulation of transcription, DNA-templated                                                                                                                      |
| 119.83843           | 104.907814          | NM_138649///XM_0   |               | 0.007 | -1.21 |         | <b>Syt17</b>           | synaptotagmin XVII                                                                 | 0006810 // transport // inferred from electronic annotation///0006887 // exocytosis // inferred from electronic annotation                                                                                                                                  |
| 73.42475            | 63.656742           | NM_001044386///NM  |               | 0.009 | -1.22 |         | <b>Zfp-ps1///Zfx</b>   | zinc finger protein, autosomal, pseudogene//zinc finger protein X-linked           | 0001541 // ovarian follicle development // inferred from mutant phenotype///0006351 // transcription, DNA-templated                                                                                                                                         |
| 117.91455           | 103.2395            | NM_001276442///NM  |               | 0.010 | -1.22 |         | <b>Acy1</b>            | aminoacylase 1                                                                     | 0006508 // proteolysis // inferred from electronic annotation///0006520 // cellular amino acid metabolic process                                                                                                                                            |
| 60.109657           | 51.34152            | NM_010827///XM_0   |               | 0.009 | -1.22 |         | <b>Msc</b>             | musculin                                                                           | 0000122 // negative regulation of transcription from RNA polymerase II promoter // inferred from direct assay//0007155 // cell adhesion // inferred from electronic annotation///0008360 // regulation of cell shape // inferred from electronic annotation |
| 1380.3821           | 1116.8933           | NM_001163256///NM  |               | 0.009 | -1.22 |         | <b>Fblim1</b>          | filamin binding LIM protein 1                                                      |                                                                                                                                                                                                                                                             |
| 277.51715           | 230.42418           | NM_001134902///NM  |               | 0.007 | -1.22 |         | <b>AU019823</b>        | expressed sequence AU019823                                                        |                                                                                                                                                                                                                                                             |
| 2221.04             | 1777.0048           | NM_011967          |               | 0.007 | -1.22 |         | <b>Pasma5</b>          | proteasome (prosome, macropain) subunit, alpha type 5                              | 0006508 // proteolysis // inferred from electronic annotation///0006511 // ubiquitin-dependent protein catabolic process                                                                                                                                    |
| 16.359215           | 13.376959           | NM_011272          |               | 0.008 | -1.22 |         | <b>Rln1</b>            | relaxin 1                                                                          | 0007188 // adenylate cyclase-modulating G-protein coupled receptor signaling pathway // not recorded///001074                                                                                                                                               |
| 291.30392           | 241.39128           | NM_001085508///XM  |               | 0.006 | -1.22 |         | <b>Tmem8b</b>          | transmembrane protein 88                                                           | 0007155 // cell adhesion // inferred from electronic annotation///0007160 // cell-matrix adhesion // not recorded, traceable author statement                                                                                                               |
| 515.34766           | 421.1316            | NM_001080742///NM  |               | 0.007 | -1.22 |         | <b>Vamp5</b>           | vesicle-associated membrane protein 5                                              | 0006887 // exocytosis // not recorded///0006906 // vesicle fusion // not recorded///0007269 // neurotransmitter release                                                                                                                                     |
| 890.584             | 719.23444           | NM_024282///XM_0   |               | 0.005 | -1.22 |         | <b>Desi2</b>           | desmoylating isopeptidase 2                                                        | 0006508 // proteolysis // inferred from electronic annotation                                                                                                                                                                                               |
| 146.01375           | 126.43931           | NM_001014395///XM  |               | 0.008 | -1.22 |         | <b>Fbxw22</b>          | F-box and WD-40 domain protein 22                                                  | 0005515 // protein binding // inferred from electronic annotation                                                                                                                                                                                           |
| 265.46164           | 220.79482           | NM_001163239///NM  |               | 0.008 | -1.22 |         | <b>Nqo2</b>            | NAD(P)H dehydrogenase, quinone 2                                                   | 0007613 // memory // inferred from electronic annotation///0005514 // oxidation-reduction process // inferred from electronic annotation                                                                                                                    |
| 65.82909            | 56.313026           | NM_001033312///XM  |               | 0.005 | -1.22 |         | <b>Fbxl18</b>          | F-box and leucine-rich repeat protein 18                                           | 0005515 // protein binding // inferred from electronic annotation                                                                                                                                                                                           |
| 307.13614           | 253.10446           | NM_011785///XM_0   |               | 0.010 | -1.22 |         | <b>Akt3</b>            | thymoma viral proto-oncogene 3                                                     | 0000002 // mitochondrial genome maintenance // not recorded///0006468 // protein phosphorylation // not recorded                                                                                                                                            |
| 989.39264           | 794.8956            | NM_008723///NR_OC  |               | 0.006 | -1.23 |         | <b>Npm3///Npm3-ps1</b> | nucleoplasm 3//nucleoplasm 3, pseudogene 1                                         | 0006364 // rRNA processing // inferred from direct assay///0009303 // rRNA transcription // inferred from electronic annotation                                                                                                                             |
| 989.39264           | 794.8956            | NM_008723///NR_OC  |               | 0.006 | -1.23 |         | <b>Npm3///Npm3-ps1</b> | nucleoplasm 3//nucleoplasm 3, pseudogene 1                                         | 0006364 // rRNA processing // inferred from direct assay///0009303 // rRNA transcription // inferred from direct assay                                                                                                                                      |
| 539.2666            | 438.72354           | NM_019432          |               | 0.006 | -1.23 |         | <b>Tmem37</b>          | transmembrane protein 37                                                           | 0006810 // transport // inferred from electronic annotation///0006811 // ion transport // inferred from electronic annotation                                                                                                                               |
| 21.371939           | 17.196777           | NR_045047          |               | 0.006 | -1.23 |         | <b>Tunar</b>           | Tcl1 upstream neural differentiation associated RNA                                |                                                                                                                                                                                                                                                             |
| 879.75104           | 706.1113            | NM_015792///XM_0   |               | 0.007 | -1.23 |         | <b>Fbxo18</b>          | F-box protein 18                                                                   | 0008152 // metabolic process // inferred from electronic annotation///00032508 // DNA duplex unwinding // inferred from electronic annotation                                                                                                               |
| 192.7467            | 163.50467           | NM_207298///XM_0   |               | 0.010 | -1.23 |         | <b>Cercam</b>          | cerebral endothelial cell adhesion molecule                                        | 0007155 // cell adhesion // not recorded///0009103 // lipopolysaccharide biosynthetic process // inferred from electronic annotation                                                                                                                        |
| 453.47842           | 368.91324           | NM_127575///NM_1   |               | 0.008 | -1.23 |         | <b>Zfp277</b>          | zinc finger protein 277                                                            | 0007301 // cellular response to hydrogen peroxide // inferred from mutant phenotype///2000772 // regulation of transcription, DNA-templated                                                                                                                 |
| 117.295425          | 101.215195          | NM_148938          |               | 0.004 | -1.23 |         | <b>Slc1a3</b>          | solute carrier family 1 (glial high affinity glutamate transporter), member 3      | 0006536 // glutamate metabolic process // inferred from mutant phenotype///0006537 // glutamate biosynthetic process                                                                                                                                        |
| 622.91656           | 501.30685           | NM_009148///XM_0   |               | 0.010 | -1.23 |         | <b>Exoc4</b>           | exocyst complex component 4                                                        | 0006612 // protein targeting to membrane // not recorded///0006810 // transport // inferred from electronic annotation                                                                                                                                      |
| 43.16491            | 35.877193           | XR_105083///XR_107 |               | 0.009 | -1.23 |         | <b>Gm12758</b>         | predicted gene 12758                                                               |                                                                                                                                                                                                                                                             |
| 174.06857           | 148.93547           | NM_001159331///NM  |               | 0.005 | -1.23 |         | <b>N6amt1</b>          | N-6 adenine-specific DNA methyltransferase 1 (putative)                            | 0006479 // protein methylation // not recorded///0030307 // positive regulation of cell growth // not recorded///0005515 // protein binding // inferred from electronic annotation                                                                          |
| 157.58698           | 135.20943           | NM_127945///XM_0   |               | 0.006 | -1.23 |         | <b>Ankrd13b</b>        | ankyrin repeat domain 13b                                                          | 0006810 // transport // inferred from electronic annotation///0006886 // intracellular protein transport // inferred from electronic annotation                                                                                                             |
| 929.68524           | 743.5187            | NM_011591///XM_0   |               | 0.006 | -1.23 |         | <b>Timm17b</b>         | translocase of inner mitochondrial membrane 17b                                    | 0010193 // response to ozone // inferred from electronic annotation///0010477 // response to sulfur dioxide // inferred from electronic annotation                                                                                                          |
| 95.04872            | 81.67747            | NM_010844///XM_0   |               | 0.009 | -1.23 |         | <b>Muc5ac</b>          | mucin 5, subtypes A and C, tracheobronchial/gastric                                | 0002098 // tRNA wobble uridine modification // not recorded///0002143 // tRNA wobble position uridine thiolation                                                                                                                                            |
| 86.94642            | 74.40261            | NM_001160330       |               | 0.010 | -1.24 |         | <b>Mocs3</b>           | molybdenum cofactor synthesis 3                                                    | 0006508 // proteolysis // inferred from electronic annotation///0010243 // response to organonitrogen compound                                                                                                                                              |
| 2443.5093           | 1936.4417           | NM_011970///XM_0   |               | 0.008 | -1.24 |         | <b>Psmb2</b>           | proteasome (prosome, macropain) subunit, beta type 2                               | 0008152 // metabolic process // inferred from electronic annotation                                                                                                                                                                                         |
| 493.4236            | 397.2164            | NM_025798///XM_0   |               | 0.007 | -1.24 |         | <b>Hint3</b>           | histidine triad nucleotide binding protein 3                                       | 0006812 // cation transport // not recorded///0006821 // chloride transport // not recorded///1902476 // chloride ion transport                                                                                                                             |
| 351.0264            | 285.8242            | NM_001271873///NM  |               | 0.005 | -1.24 |         | <b>Ano10</b>           | anoctamin 10                                                                       | 0006508 // proteolysis // inferred from electronic annotation///0051603 // proteolysis involved in cellular protein catabolic process                                                                                                                       |
| 1409.6046           | 1121.9183           | NM_011185          |               | 0.007 | -1.24 |         | <b>Psmb1</b>           | proteasome (prosome, macropain) subunit, beta type 1                               | 0007165 // signal transduction // inferred from electronic annotation///0007601 // visual perception // inferred from electronic annotation                                                                                                                 |
| 55.610065           | 46.34353            | NM_008189          |               | 0.008 | -1.24 |         | <b>Guca1a</b>          | guanylate cyclase activator 1a (retina)                                            | 0006184 // GTP catabolic process // inferred from electronic annotation///0007165 // signal transduction // inferred from electronic annotation                                                                                                             |
| 255.35707           | 211.1263            | NM_025931          |               | 0.007 | -1.24 |         | <b>Ifi271</b>          | intraflagellar transport 27                                                        | 0006412 // translation // inferred from direct assay///0006412 // translation // not recorded///0006413 // translation                                                                                                                                      |
| 1503.741            | 1198.7594           | NM_026114          |               | 0.010 | -1.24 |         | <b>Eif2s1</b>          | eukaryotic translation initiation factor 2, subunit 1 alpha                        | 0000165 // MAPK cascade // inferred from electronic annotation///0000186 // activation of MAPKK activity // inferred from electronic annotation                                                                                                             |
| 158.36768           | 135.47089           | NM_001081292///NM  |               | 0.009 | -1.24 |         | <b>Map3k10</b>         | mitogen-activated protein kinase kinase 10                                         | 0007165 // signal transduction // inferred from electronic annotation                                                                                                                                                                                       |
| 49.822277           | 40.91523            | NM_028474///XM_0   |               | 0.006 | -1.24 |         | <b>Ptchd4</b>          | patched domain containing 4                                                        | 0001755 // neural crest cell migration // not recorded///0007169 // transmembrane receptor protein tyrosine kinase activity                                                                                                                                 |
| 266.6047            | 220.19589           | NM_008738///XM_0   |               | 0.008 | -1.24 |         | <b>Nrtn</b>            | neurturin                                                                          | 0000212 // meiotic spindle organization // inferred from expression pattern///0006184 // GTP catabolic process // inferred from electronic annotation                                                                                                       |
| 410.37567           | 332.3897            | NM_134024          |               | 0.005 | -1.24 |         | <b>Tubg1</b>           | tubulin, gamma 1                                                                   | 0006508 // proteolysis // not recorded///0030163 // protein catalytic process // traceable author statement///0006351 // transcription, DNA-templated // inferred from electronic annotation///0006355 // regulation of transcription, DNA-templated        |
| 2634.9792           | 2072.5742           | NM_011971          |               | 0.009 | -1.24 |         | <b>Psmb3</b>           | proteasome (prosome, macropain) subunit, beta type 3                               | 0006506 // GPI anchor biosynthetic process // not recorded///0009893 // positive regulation of metabolic process                                                                                                                                            |
| 123.25133           | 105.12771           | NM_007922          |               | 0.010 | -1.24 |         | <b>Elk1</b>            | ELK1, member of ETS oncogene family                                                | 0022011 // myelination in peripheral nervous system // not recorded///0032319 // regulation of Rho GTPase activity                                                                                                                                          |
| 787.7596            | 625.82385           | NM_025574          |               | 0.010 | -1.24 |         | <b>Pyrj</b>            | Pigj upstream reading frame                                                        |                                                                                                                                                                                                                                                             |
| 137.68909           | 117.15027           | NM_001037736///NM  |               | 0.005 | -1.24 |         | <b>Arhgef10</b>        | Rho guanine nucleotide exchange factor (GEF) 10                                    | 0006351 // transcription, DNA-templated // inferred from electronic annotation///0006355 // regulation of transcription, DNA-templated                                                                                                                      |
| 46.323574           | 37.967438           | XR_376884///XR_376 |               | 0.006 | -1.24 |         | <b>2210406O10Rik</b>   | RIKEN cDNA 2210406O10 gene                                                         | 0006351 // transcription, DNA-templated // inferred from electronic annotation///0006355 // regulation of transcription, DNA-templated                                                                                                                      |
| 24.71157            | 19.674719           | NM_029416///XM_0   |               | 0.007 | -1.24 |         | <b>Klf17</b>           | Kruppel-like factor 17                                                             | 0006351 // transcription, DNA-templated // inferred from electronic annotation///0006355 // regulation of transcription, DNA-templated                                                                                                                      |
| 649.7859            | 516.76373           | NM_001177945///NM  |               | 0.005 | -1.24 |         | <b>Aamdac</b>          | adipogenesis associated Mth938 domain containing                                   | 0043066 // negative regulation of apoptotic process // inferred from mutant phenotype///0045600 // positive regulation of cell growth                                                                                                                       |
| 232.44029           | 192.35313           | NM_001033314///XM  |               | 0.003 | -1.25 |         | <b>Ccdc61</b>          | coiled-coil domain containing 61                                                   | 0005813 // centrosome // not recorded                                                                                                                                                                                                                       |
| 989.9023            | 783.88446           | NM_029354///XM_0   |               | 0.004 | -1.25 |         | <b>Mzt2</b>            | mitotic spindle organizing protein 2                                               | 0005737 // cytoplasm // inferred from electronic annotation///0005813 // centrosome // not recorded///0005815 // cytoskeleton organization                                                                                                                  |
| 101.54686           | 86.47637            | NM_001294308///NM  |               | 0.008 | -1.25 |         | <b>Ngb</b>             | neuroglobin                                                                        | 0006810 // transport // inferred from electronic annotation///0006915 // apoptotic process // inferred from electronic annotation                                                                                                                           |
| 612.22876           | 488.40732           | NM_001164212///NM  |               | 0.009 | -1.25 |         | <b>Rerg</b>            | RAS-like, estrogen-regulated, growth-inhibitor                                     | 0006184 // GTP catabolic process // not recorded///0007165 // signal transduction // inferred from electronic annotation                                                                                                                                    |
| 384.34775           | 310.46234           | NM_026113///XM_0   |               | 0.006 | -1.25 |         | <b>Gtf3c6</b>          | general transcription factor IIIC, polypeptide 6, alpha                            | 0006351 // transcription, DNA-templated // not recorded///0006383 // transcription from RNA polymerase III promoter                                                                                                                                         |
| 234.521             | 193.99869           | NM_026015///XM_0   |               | 0.008 | -1.25 |         | <b>Zmat5</b>           | zinc finger, matrix type 5                                                         | 0006397 // mRNA processing // inferred from electronic annotation///0008380 // RNA splicing // inferred from electronic annotation                                                                                                                          |
| 470.45953           | 377.14816           | NM_021428///XM_0   |               | 0.007 | -1.25 |         | <b>Dexi</b>            | dexamethasone-induced transcript                                                   |                                                                                                                                                                                                                                                             |
| 46.05425            | 37.707077           | NM_001122639///NM  |               | 0.008 | -1.25 |         | <b>Galnt9</b>          | UDP-N-acetyl-alpha-D-galactosamine:polypeptide N-acetylgalactosaminyltransferase 9 | 0006486 // protein glycosylation // inferred from electronic annotation///0008152 // metabolic process // inferred from electronic annotation                                                                                                               |
| 66.13625            | 55.53621            | NM_028411///XM_0   |               | 0.007 | -1.25 |         | <b>Tmem138</b>         | transmembrane protein 138                                                          | 0030030 // cell projection organization // inferred from electronic annotation///0042384 // cilium assembly // not recorded                                                                                                                                 |
| 39.58425            | 32.221634           | NM_001080934///XM  |               | 0.009 | -1.25 |         | <b>Slc16a5</b>         | solute carrier family 16 (monocarboxylic acid transporters), member 5              | 0006810 // transport // inferred from electronic annotation///0055085 // transmembrane transport // inferred from electronic annotation                                                                                                                     |
| 720.2045            | 570.7497            | NM_025375///XM_0   |               | 0.006 | -1.25 |         | <b>Wbscr22</b>         | Williams Beuren syndrome chromosome region 22                                      | 0006351 // transcription, DNA-templated // inferred from electronic annotation///0006355 // regulation of transcription, DNA-templated                                                                                                                      |
| 163.35278           | 138.26282           | NM_001254762///NM  |               | 0.007 | -1.25 |         | <b>Mospd3</b>          | motile sperm domain containing 3                                                   | 0007507 // heart development // inferred from mutant phenotype                                                                                                                                                                                              |
| 156.05014           | 131.78233           | NM_009088///XM_0   |               | 0.008 | -1.25 |         | <b>Poir1a</b>          | polymerase (RNA) I polypeptide A                                                   | 0006351 // transcription, DNA-templated // inferred from electronic annotation///0006360 // transcription from RNA polymerase II promoter                                                                                                                   |

| [Nrf2-KO, Air, PBS] | [Nrf2-KO, Air, SFN] | RefSeq       | Transcript ID | p     | FC    | PBS:SFN | Gene Symbol                             | Gene Title                                                                          | Gene Ontology                                                                                                           |
|---------------------|---------------------|--------------|---------------|-------|-------|---------|-----------------------------------------|-------------------------------------------------------------------------------------|-------------------------------------------------------------------------------------------------------------------------|
| 535.29517           | 425.36746           | NM_001162521 | ///NM         | 0.005 | -1.25 |         | <i>Dguak</i>                            | deoxyguanosine kinase                                                               | 0006139 // nucleobase-containing compound metabolic process // traceable author statement///0006468 // prote            |
| 26.434654           | 20.879622           | NM_001007573 | ///XA         | 0.006 | -1.25 |         | <i>Maneal</i>                           | mannosidase, endo-alpha-like                                                        | 0008152 // metabolic process // inferred from electronic annotation                                                     |
| 1734.5222           | 1356.5464           | NM_019953    | ///XM_OI      | 0.005 | -1.25 |         | <i>Cnpy2</i>                            | canopy 2 homolog (zebrafish)                                                        | 0010629 // negative regulation of gene expression // inferred from mutant phenotype///0010988 // regulation of          |
| 162.99133           | 137.81621           | NM_001081179 | ///NM         | 0.006 | -1.25 |         | <i>Heatr5b</i>                          | HEAT repeat containing 5B                                                           | 0005488 // binding // inferred from electronic annotation///0005515 // protein binding // inferred from physical i      |
| 1230.6725           | 963.49365           | NM_001261    | ///NM         | 0.006 | -1.26 |         | <i>Fundc2</i>                           | FUN14 domain containing 2                                                           | 0005634 // nucleus // not recorded///0005739 // mitochondrion // not recorded                                           |
| 230.83437           | 189.71242           | NM_172522    | ///XM_OI      | 0.007 | -1.26 |         | <i>Mrpl21</i>                           | mitochondrial ribosomal protein L21                                                 | 0006412 // translation // inferred from electronic annotation                                                           |
| 284.14886           | 229.68207           | NM_0025525   | ///NM         | 0.003 | -1.26 |         | <i>Rnf113a2</i>                         | ring finger protein 113A2                                                           | 0005515 // protein binding // inferred from electronic annotation///0008270 // zinc ion binding // inferred from el     |
| 1228.8027           | 963.52545           | NM_013902    | ///NM         | 0.003 | -1.26 |         | <i>Fkbp3</i>                            | FK506 binding protein 3                                                             | 0000413 // protein peptidyl-prolyl isomerization // not recorded///0006457 // protein folding // inferred from elec     |
| 558.4193            | 442.84793           | NM_026230    | ///NM_2       | 0.009 | -1.26 |         | <i>H2afy2</i> /// <i>H2afy3</i>         | H2A histone family, member Y2///H2A histone family, member Y3                       | 0000122 // negative regulation of transcription from RNA polymerase II promoter // not recorded///0006334 // nu         |
| 65.65393            | 54.662155           | NM_008593    | ///NM         | 0.009 | -1.26 |         | <i>Foxd2</i>                            | forkhead box D2                                                                     | 0000122 // negative regulation of transcription from RNA polymerase II promoter // not recorded///0001658 // br         |
| 449.9475            | 357.03183           | NM_029632    | ///NM         | 0.005 | -1.26 |         | <i>Ppp1r11</i>                          | protein phosphatase 1, regulatory (inhibitor) subunit 11                            | 0043086 // negative regulation of catalytic activity // inferred from direct assay                                      |
| 33.219917           | 26.500816           | NM_009890    | ///NM         | 0.010 | -1.26 |         | <i>Ch25h</i>                            | cholesterol 25-hydroxylase                                                          | 0006629 // lipid metabolic process // inferred from electronic annotation///0006633 // fatty acid biosynthetic pro      |
| 348.38257           | 278.60934           | NM_001285899 | ///NM         | 0.005 | -1.26 |         | <i>Eri3</i>                             | exoribonuclease 3                                                                   | 0008152 // metabolic process // inferred from electronic annotation///0090305 // nucleic acid phosphodiester bo         |
| 98.80254            | 83.39764            | NM_001113211 | ///NM         | 0.010 | -1.26 |         | <i>1700012D01Rik</i> /// <i>Tmem194</i> | RIKEN cDNA 1700012D01 gene///transmembrane protein 194                              | 0016020 // membrane // inferred from electronic annotation///0016021 // integral component of membrane // in            |
| 64.66186            | 53.546825           | NM_023695    | ///XM_OI      | 0.006 | -1.26 |         | <i>Crybb1</i>                           | crystallin, beta B1                                                                 | 0005212 // structural constituent of eye lens // not recorded///0005515 // protein binding // inferred from physi       |
| 2929.6816           | 2277.4053           | NM_025511    | ///NM         | 0.008 | -1.26 |         | <i>Cox20</i>                            | COX20 Cox2 chaperone                                                                | 0005739 // mitochondrion // inferred from direct assay///0005739 // mitochondrion // not recorded///0016020 // in       |
| 39.658686           | 31.834368           | NM_008622    | ///NM         | 0.003 | -1.26 |         | <i>Onecut1</i>                          | one cut domain, family member 1                                                     | 0001889 // liver development // inferred from genetic interaction///0001952 // regulation of cell-matrix adhesion       |
| 187.26993           | 155.51958           | NM_023556    | ///XM_OI      | 0.007 | -1.26 |         | <i>Mvk</i>                              | mevalonate kinase                                                                   | 0006629 // lipid metabolic process // inferred from electronic annotation///0006694 // steroid biosynthetic proces      |
| 764.88684           | 598.97253           | NM_023587    | ///XM_OI      | 0.003 | -1.26 |         | <i>Ptp1b</i>                            | protein tyrosine phosphatase-like (proline instead of catalytic arginine), member b | 0006629 // lipid metabolic process // inferred from electronic annotation///0006631 // fatty acid metabolic proces      |
| 1018.7957           | 799.08026           | NM_011895    | ///XM_OI      | 0.006 | -1.26 |         | <i>Slc35a1</i>                          | solute carrier family 35 (CMP-sialic acid transporter), member 1                    | 0006810 // transport // inferred from electronic annotation///0008643 // carbohydrate transport // inferred from        |
| 24.682493           | 19.322618           | NM_001099631 | ///NM         | 0.003 | -1.26 |         | <i>Sh2d5</i>                            | SH2 domain containing 5                                                             | 0005515 // protein binding // inferred from electronic annotation                                                       |
| 296.38144           | 238.13055           | NM_001163170 | ///NM         | 0.006 | -1.26 |         | <i>Lix1l</i>                            | Lix1-like                                                                           | 0005515 // protein binding // inferred from electronic annotation                                                       |
| 415.78082           | 330.5474            | NM_001122960 | ///NM         | 0.005 | -1.26 |         | <i>Cdc53</i>                            | coiled-coil domain containing 53                                                    | 0016020 // membrane // inferred from electronic annotation///0016021 // integral component of membrane // in            |
| 132.59949           | 110.72405           | NM_029857    | ///XM_OI      | 0.005 | -1.26 |         | <i>Tmco4</i>                            | transmembrane and coiled-coil domains 4                                             | 0048511 // rhythmic process // inferred from electronic annotation                                                      |
| 208.34454           | 171.5037            | NM_027323    | ///XM_OI      | 0.006 | -1.26 |         | <i>Srrd</i>                             | SRR1 domain containing                                                              | 0006470 // protein dephosphorylation // inferred from direct assay                                                      |
| 80.88303            | 67.87937            | NM_027982    | ///XM_OI      | 0.006 | -1.26 |         | <i>Ppm1j</i>                            | protein phosphatase 1J                                                              | 0001667 // amoeboid cell migration // not recorded///0007049 // cell cycle // inferred from electronic annotation       |
| 267.62848           | 216.19978           | NM_028448    | ///XM_OI      | 0.003 | -1.27 |         | <i>Cenpv</i>                            | centromere protein V                                                                | 0001881 // receptor recycling // not recorded///0007032 // endosome organization // not recorded///0042147 //           |
| 118.02771           | 99.15969            | NM_177391    | ///XM_OI      | 0.002 | -1.27 |         | <i>Fam109b</i>                          | family with sequence similarity 109, member B                                       | 0006351 // transcription, DNA-templated // inferred from electronic annotation///0006355 // regulation of transci       |
| 32.795536           | 25.93246            | NM_0219929   | ///XA         | 0.009 | -1.27 |         | <i>Zmynd15</i>                          | zinc finger, MYND-type containing 15                                                | 0001816 // cytokine production // inferred from direct assay///0002376 // immune system process // inferred fro         |
| 103.3836            | 86.55347            | NM_029926    | ///NM         | 0.006 | -1.27 |         | <i>Irak4</i>                            | interleukin-1 receptor-associated kinase 4                                          | 0016180 // snRNA processing // not recorded                                                                             |
| 404.31158           | 319.5324            | NM_001253731 | ///NM         | 0.004 | -1.27 |         | <i>Ints9</i>                            | integrator complex subunit 9                                                        | 0006450 // regulation of translational fidelity // inferred from electronic annotation                                  |
| 511.71274           | 402.5081            | NM_001163454 | ///NM         | 0.008 | -1.27 |         | <i>Prorsd1</i>                          | prolyl-tRNA synthetase domain containing 1                                          | 0005488 // binding // inferred from electronic annotation///0044822 // poly(A) RNA binding // not recorded              |
| 148.44363           | 123.3462            | NM_145432    | ///XM_OI      | 0.007 | -1.27 |         | <i>Heatr6</i>                           | HEAT repeat containing 6///Mus musculus HEAT repeat containing 6 (Heatr6), mRN      | 0007165 // signal transduction // inferred from electronic annotation///0007186 // G-protein coupled receptor sig       |
| 60.447395           | 49.469555           | NM_009314    | ///NM         | 0.003 | -1.27 |         | <i>Tacr2</i>                            | tachykinin receptor 2                                                               | 0006351 // transcription, DNA-templated // inferred from electronic annotation///0006355 // regulation of transci       |
| 108.19862           | 90.95807            | NM_030060    | ///XM_OI      | 0.005 | -1.27 |         | <i>Batf3</i>                            | basic leucine zipper transcription factor, ATF-like 3                               | 0005525 // GTP binding // inferred from electronic annotation                                                           |
| 294.87262           | 235.92267           | NM_174960    | ///NM         | 0.004 | -1.27 |         | <i>Gimap9</i>                           | GTPase, IMAP family member 9                                                        | 0006364 // rRNA processing // inferred from electronic annotation///0042254 // ribosome biogenesis // inferred f        |
| 1913.2892           | 1485.0658           | NM_028632    | ///NM         | 0.007 | -1.27 |         | <i>Fcf1</i>                             | FCF1 small subunit (SSU) processome component homolog (S. cerevisiae)               | 0006886 // intracellular protein transport // inferred from electronic annotation///0007340 // acrosome reaction //     |
| 607.50995           | 472.9059            | NM_001286033 | ///NM         | 0.006 | -1.27 |         | <i>Stx2</i>                             | syntaxin 2                                                                          | 0006139 // nucleobase-containing compound metabolic process // inferred from electronic annotation///0032259            |
| 67.4342             | 55.28693            | NM_176917    | ///XM_OI      | 0.007 | -1.27 |         | <i>Mettl4</i>                           | methyltransferase like 4                                                            | 0006915 // apoptotic process // inferred from electronic annotation///0007049 // cell cycle // inferred from electr     |
| 1108.5682           | 865.7077            | NM_026455    | ///NM         | 0.006 | -1.27 |         | <i>Fam32a</i>                           | family with sequence similarity 32, member A                                        | 0006351 // transcription, DNA-templated // inferred from electronic annotation///0006355 // regulation of transci       |
| 81.807014           | 67.638535           | NM_020596    | ///NM         | 0.006 | -1.28 |         | <i>Egr4</i>                             | early growth response 4                                                             | 0007015 // actin filament organization // inferred from direct assay///0007507 // heart development // inferred fr      |
| 1756.3993           | 1353.6064           | NM_016798    | ///XM_OI      | 0.006 | -1.28 |         | <i>Pdlim3</i>                           | PDZ and LIM domain 3                                                                | 0006119 // oxidative phosphorylation // not recorded///0006754 // ATP biosynthetic process // not recorded///OC         |
| 945.5018            | 730.1995            | NM_001217174 | ///NM         | 0.003 | -1.28 |         | <i>Surf1</i>                            | surfeit gene 1                                                                      | 0005515 // protein binding // inferred from electronic annotation///0042802 // identical protein binding // inferre     |
| 238.46631           | 192.21892           | NM_029321    | ///XM_OI      | 0.002 | -1.28 |         | <i>Ttc32</i>                            | tetratricopeptide repeat domain 32                                                  | 0006351 // transcription, DNA-templated // inferred from electronic annotation///0006355 // regulation of transci       |
| 474.50665           | 371.48984           | NM_152895    | ///XM_OI      | 0.006 | -1.28 |         | <i>Kdm5b</i>                            | lysine (K)-specific demethylase 5B                                                  | 0007018 // microtubule-based movement // traceable author statement///0008088 // axon cargo transport // infe           |
| 140.98708           | 117.24186           | NM_008451    | ///NR_O4      | 0.008 | -1.28 |         | <i>Klc2</i>                             | kinesin light chain 2                                                               | 0030030 // cell projection organization // inferred from electronic annotation///0042384 // cilium assembly // not      |
| 362.21988           | 284.94547           | NM_025455    | ///XM_OI      | 0.004 | -1.28 |         | <i>Cdc28b</i>                           | coiled coil domain containing 28B                                                   | 0005515 // protein binding // inferred from electronic annotation                                                       |
| 52.466618           | 41.99371            | NM_001081971 | ///NM         | 0.005 | -1.28 |         | <i>Ankrd63</i>                          | ankyrin repeat domain 63                                                            | 0007275 // multicellular organismal development // inferred from electronic annotation                                  |
| 482.1801            | 375.5232            | NM_021436    | ///XM_OI      | 0.005 | -1.28 |         | <i>Tmeff1</i>                           | transmembrane protein with EGF-like and two follistatin-like domains 1              | 0006200 // ATP catabolic process // not recorded///0006810 // transport // inferred from electronic annotation///       |
| 457.9985            | 357.0014            | NM_028493    | ///XM_OI      | 0.007 | -1.28 |         | <i>Rhobtb3</i>                          | Rho-related BTB domain containing 3                                                 | 0006584 // catecholamine metabolic process // inferred from electronic annotation///0042135 // neurotransmitte          |
| 909.24036           | 703.30695           | NM_173740    | ///NM         | 0.009 | -1.28 |         | <i>Maoa</i>                             | monoamine oxidase A                                                                 | 0007049 // cell cycle // inferred from electronic annotation///0007126 // meiotic nuclear division // inferred from     |
| 775.07916           | 597.96216           | NM_001168244 | ///NM         | 0.010 | -1.28 |         | <i>Syce2</i>                            | synaptonemal complex central element protein 2                                      | 0002523 // leukocyte migration involved in inflammatory response // not recorded///0002675 // positive regulatic        |
| 529.28296           | 412.5257            | NM_009675    | ///XM_OI      | 0.006 | -1.28 |         | <i>Aoc3</i>                             | amine oxidase, copper containing 3                                                  | 0035556 // intracellular signal transduction // inferred from electronic annotation                                     |
| 978.7117            | 752.5945            | NM_030131    | ///NM         | 0.003 | -1.28 |         | <i>Cnih4</i>                            | cornichon homolog 4 (Drosophila)                                                    | 0006810 // transport // inferred from electronic annotation///0009725 // response to hormone // inferred from di        |
| 52.12504            | 41.544483           | NM_033145    | ///NM         | 0.008 | -1.28 |         | <i>Lcn8</i>                             | lipocalin 8                                                                         | 0006620 // posttranslational protein targeting to membrane // traceable author statement///0006810 // transport         |
| 101.99454           | 84.24645            | NM_008035    | ///XM_OI      | 0.004 | -1.28 |         | <i>Folr2</i>                            | folate receptor 2 (fetal)                                                           | 0001932 // regulation of protein phosphorylation // inferred from mutant phenotype///0006351 // transcription, t        |
| 212.474             | 171.83119           | NM_133932    | ///XM_OI      | 0.009 | -1.28 |         | <i>Tada3</i>                            | transcriptional adaptor 3                                                           | 0000413 // protein peptidyl-prolyl isomerization // inferred from electronic annotation///0006397 // mRNA proces        |
| 460.60928           | 358.6683            | NM_001285826 | ///NM         | 0.004 | -1.28 |         | <i>Ppil3</i>                            | peptidylprolyl isomerase (cyclophilin)-like 3                                       | 0006351 // transcription, DNA-templated // inferred from electronic annotation///0006355 // regulation of transci       |
| 1726.8342           | 1324.4606           | NM_021519    | ///XM_OI      | 0.004 | -1.28 |         | <i>Edf1</i> /// <i>Gm11964</i>          | endothelial differentiation-related factor 1///predicted gene 11964                 | 0006351 // transcription, DNA-templated // inferred from electronic annotation///0006355 // regulation of transci       |
| 1726.8342           | 1324.4606           | NM_021519    | ///XM_OI      | 0.004 | -1.28 |         | <i>Edf1</i> /// <i>Gm11964</i>          | endothelial differentiation-related factor 1///predicted gene 11964                 | 0007264 // small GTPase mediated signal transduction // inferred from electronic annotation///0007265 // Ras pr         |
| 1353.7998           | 1038.3312           | NM_001166493 | ///NM         | 0.008 | -1.28 |         | <i>Rasgrp3</i>                          | RAS, guanyl releasing protein 3                                                     | 0000038 // very long-chain fatty acid metabolic process // not recorded///0000038 // very long-chain fatty acid ac      |
| 34.8133             | 27.217539           | NM_053178    | ///XM_OI      | 0.010 | -1.28 |         | <i>Acsbg1</i>                           | acyl-CoA synthetase bubblegum family member 1                                       | 0006412 // translation // inferred from electronic annotation                                                           |
| 556.77026           | 432.66962           | NM_078479    | ///XM_OI      | 0.004 | -1.29 |         | <i>Mrps21</i>                           | mitochondrial ribosomal protein S21                                                 | 0042417 // dopamine metabolic process // not recorded///0046928 // regulation of neurotransmitter secretion //          |
| 102.587             | 84.5812             | NM_001199151 | ///NM         | 0.002 | -1.29 |         | <i>Sncalp</i>                           | synuclein, alpha interacting protein (synphilin)                                    | 0032981 // mitochondrial respiratory chain complex I assembly // not recorded///0070584 // mitochondrion morp           |
| 633.3487            | 488.12845           | NM_029760    | ///XM_OI      | 0.007 | -1.29 |         | <i>Nubpl</i>                            | nucleotide binding protein-like                                                     | 0005515 // protein binding // inferred from electronic annotation                                                       |
| 167.7549            | 138.43306           | NM_001081441 | ///NM         | 0.008 | -1.29 |         | <i>Wdr86</i>                            | WD repeat domain 86                                                                 | 0007049 // cell cycle // inferred from electronic annotation///0007059 // chromosome segregation // not recorded        |
| 121.73956           | 100.23331           | NM_013848    | ///XM_OI      | 0.008 | -1.29 |         | <i>Ermap</i>                            | erythroblast membrane-associated protein                                            | 0001662 // behavioral fear response // traceable author statement///0007165 // signal transduction // inferred fr       |
| 325.30963           | 254.96643           | NM_028232    | ///XM_OI      | 0.007 | -1.29 |         | <i>Sgol1</i>                            | shugoshin-like 1 (S. pombe)                                                         | 0006260 // DNA replication // not recorded///0016477 // cell migration // not recorded///0016567 // protein ubiq        |
| 40.117584           | 31.673004           | NM_001160353 | ///XR         | 0.006 | -1.29 |         | <i>Grm2</i> /// <i>LOC102636702</i>     | glutamate receptor, metabotropic 2///uncharacterized LOC102636702                   | 0006457 // protein folding // inferred from electronic annotation///00050790 // regulation of catalytic activity // inl |
| 117.50854           | 97.1269             | NM_172747    | ///XM_OI      | 0.005 | -1.29 |         | <i>Kctd13</i>                           | potassium channel tetramerisation domain containing 13                              |                                                                                                                         |
| 1548.231            | 1186.4258           | NM_024478    | ///NM         | 0.008 | -1.29 |         | <i>Grpel1</i>                           | GrpE-like 1, mitochondrial                                                          |                                                                                                                         |

| [Nrf2-KO, Air, PBS] | [Nrf2-KO, Air, SFN] | RefSeq       | Transcript ID | p     | FC    | SFN | Gene Symbol                                     | Gene Title                                                                            | Gene Ontology                                                                                                                                       |
|---------------------|---------------------|--------------|---------------|-------|-------|-----|-------------------------------------------------|---------------------------------------------------------------------------------------|-----------------------------------------------------------------------------------------------------------------------------------------------------|
| 476.4157            | 369.01642           | NM_013586    |               | 0.002 | -1.29 |     | <i>Loxl3</i>                                    | lysyl oxidase-like 3                                                                  | 0001837 // epithelial to mesenchymal transition // not recorded /// 0006898 // receptor-mediated endocytosis // inferred from electronic annotation |
| 114.405396          | 94.29895            | NM_028825    | ///XM_0       | 0.005 | -1.29 |     | <i>Tex37</i>                                    | testis expressed 37                                                                   | 0005634 // nucleus // inferred from electronic annotation                                                                                           |
| 125.175735          | 102.549065          | NM_172462    |               | 0.004 | -1.29 |     | <i>Zfp11</i>                                    | zinc finger protein 11                                                                | 0006355 // regulation of transcription, DNA-templated // not recorded                                                                               |
| 195.63348           | 158.35936           | NM_026144    |               | 0.003 | -1.29 |     | <i>Dhdds</i>                                    | dehydrodolichyl diphosphate synthase                                                  | 0006488 // protein glycosylation // inferred from electronic annotation /// 0008152 // metabolic process // inferred from electronic annotation     |
| 149.88881           | 122.41641           | NM_001293791 | ///NM         | 0.001 | -1.29 |     | <i>Ints10</i>                                   | integrator complex subunit 10                                                         | 0016180 // snRNA processing // not recorded                                                                                                         |
| 250.27039           | 198.5933            | NM_001110017 | ///NM         | 0.002 | -1.29 |     | <i>Dzip3</i>                                    | DAZ interacting protein 3, zinc finger                                                | 0000209 // protein polyubiquitination // not recorded /// 0016567 // protein ubiquitination // inferred from electronic annotation                  |
| 90.20711            | 73.66294            | NM_174877    | ///XM_0       | 0.003 | -1.29 |     | <i>Zar1</i>                                     | zygote arrest 1                                                                       | 0007275 // multicellular organismal development // inferred from electronic annotation                                                              |
| 25.734549           | 19.6784             | NM_130457    | ///XM_0       | 0.004 | -1.29 |     | <i>Cntnap4</i>                                  | contactin associated protein-like 4                                                   | 0007155 // cell adhesion // inferred from electronic annotation /// 0032225 // regulation of synaptic transmission, i                               |
| 509.5329            | 391.52274           | NM_001284409 | ///NM         | 0.006 | -1.29 |     | <i>Casp3</i>                                    | caspase 3                                                                             | 0001782 // B cell homeostasis // inferred from mutant phenotype /// 0001836 // release of cytochrome c from mitc                                    |
| 76.96827            | 62.538654           | NM_009779    |               | 0.004 | -1.30 |     | <i>C3ar1</i>                                    | complement component 3a receptor 1                                                    | 0002430 // complement receptor mediated signaling pathway // not recorded /// 0002462 // tolerance induction t                                      |
| 202.84416           | 163.37778           | NM_027122    |               | 0.005 | -1.30 |     | <i>Mfsd3</i>                                    | major facilitator superfamily domain containing 3                                     | 0006810 // transport // inferred from electronic annotation /// 0055085 // transmembrane transport // inferred fr                                   |
| 107.17194           | 87.640625           | NM_009767    | ///XM_0       | 0.006 | -1.30 |     | <i>Chic1</i>                                    | cysteine-rich hydrophobic domain 1                                                    | 0005886 // plasma membrane // inferred from electronic annotation /// 0016020 // membrane // inferred from ele                                      |
| 109.01              | 89.50757            | NM_024171    | ///XM_0       | 0.009 | -1.30 |     | <i>LOC101055909</i> /// <i>Sec61b</i>           | protein transport protein Sec61 subunit beta-like /// Sec61 beta subunit              | 0000060 // protein import into nucleus, translocation // not recorded /// 0006810 // transport // inferred from elec                                |
| 382.34888           | 296.6227            | NM_013841    |               | 0.003 | -1.30 |     | <i>Vps45</i>                                    | vacuolar protein sorting 45 (yeast)                                                   | 0006810 // transport // inferred from electronic annotation /// 0006904 // vesicle docking involved in exocytosis //                                |
| 867.3517            | 662.38306           | NM_026616    |               | 0.002 | -1.30 |     | <i>Rnaseh2c</i>                                 | ribonuclease H2, subunit C                                                            | 0006401 // RNA catabolic process // not recorded                                                                                                    |
| 501.81345           | 385.24234           | NM_197987    | ///XM_0       | 0.003 | -1.30 |     | <i>Trim37</i>                                   | tripartite motif-containing 37                                                        | 0016567 // protein ubiquitination // inferred from electronic annotation /// 0032088 // negative regulation of NF- $\kappa$                         |
| 183.90825           | 149.64224           | NM_178732    | ///XM_0       | 0.009 | -1.30 |     | <i>Zfp324</i>                                   | zinc finger protein 324                                                               | 0006355 // regulation of transcription, DNA-templated // inferred from electronic annotation                                                        |
| 2115.042            | 1600.8473           | NM_007483    |               | 0.007 | -1.30 |     | <i>Rhob</i>                                     | ras homolog gene family, member B                                                     | 0000910 // cytokinesis // not recorded /// 0001525 // angiogenesis // inferred from electronic annotation /// 000618                                |
| 18.135279           | 13.792897           | NM_001282054 | ///NM         | 0.009 | -1.30 |     | <i>Msh4</i>                                     | mutS homolog 4 (E. coli)                                                              | 0001541 // ovarian follicle development // inferred from mutant phenotype /// 0006200 // ATP catabolic process //                                   |
| 17.628971           | 13.596579           | NR_045271    | ///XR_37i     | 0.004 | -1.30 |     | <i>Fcor</i>                                     | Foxo1 corepressor                                                                     | 0001659 // temperature homeostasis // inferred from mutant phenotype /// 0001678 // cellular glucose homeosta                                       |
| 53.980125           | 42.4273             |              |               | 0.003 | -1.30 |     | <i>Cdc42os</i>                                  | coiled-coil domain containing 42, opposite strand                                     |                                                                                                                                                     |
| 169.78061           | 138.70511           | NM_020505    | ///NM_1       | 0.004 | -1.30 |     | <i>Vav3</i>                                     | vav 3 oncogene                                                                        | 0001525 // angiogenesis // inferred from electronic annotation /// 0006906 // vesicle fusion // inferred from geneti                                |
| 328.12732           | 254.36638           | NM_025784    | ///XM_0       | 0.003 | -1.30 |     | <i>Bcs1l</i>                                    | BCS1-like (yeast)                                                                     | 0007005 // mitochondrion organization // not recorded /// 0008152 // metabolic process // inferred from electroni                                   |
| 156.58208           | 127.365             | NM_001008700 | ///NM         | 0.006 | -1.30 |     | <i>Il4ra</i>                                    | interleukin 4 receptor, alpha                                                         | 0002376 // immune system process // inferred from electronic annotation /// 0002532 // production of molecular r                                    |
| 221.88066           | 176.4187            | NM_028713    | ///XM_0       | 0.009 | -1.30 |     | <i>Rftn2</i>                                    | ratfin family member 2                                                                | 0033227 // dsRNA transport // inferred from mutant phenotype /// 0043330 // response to exogenous dsRNA // inf                                      |
| 185.7343            | 150.49617           | NM_001163495 | ///NM         | 0.006 | -1.30 |     | <i>Arhgap19</i>                                 | Rho GTPase activating protein 19                                                      | 0007165 // signal transduction // inferred from electronic annotation /// 0043547 // positive regulation of GTPase a                                |
| 171.35478           | 138.85974           | NM_019726    | ///XM_0       | 0.003 | -1.30 |     | <i>Gps2</i>                                     | G protein pathway suppressor 2                                                        | 0000122 // negative regulation of transcription from RNA polymerase II promoter // not recorded /// 0046329 // ne                                   |
| 126.33621           | 103.3327            | NM_013415    |               | 0.007 | -1.30 |     | <i>Atp1b2</i>                                   | ATPase, Na <sup>+</sup> /K <sup>+</sup> transporting, beta 2 polypeptide              | 0006200 // ATP catabolic process // not recorded /// 0006810 // transport // inferred from electronic annotation ///                                |
| 74.2149             | 59.768456           | NM_001290011 | ///NM         | 0.007 | -1.30 |     | <i>Pemt</i>                                     | phosphatidylethanolamine N-methyltransferase                                          | 0006629 // lipid metabolic process // inferred from electronic annotation /// 0006644 // phospholipid metabolic pr                                  |
| 63.96999            | 51.13846            | NM_183141    | ///XM_0       | 0.006 | -1.31 |     | <i>Elfn2</i>                                    | leucine rich repeat and fibronectin type III, extracellular 2                         | 0010923 // negative regulation of phosphatase activity // not recorded                                                                              |
| 102.39672           | 82.71131            | NM_031402    | ///XM_0       | 0.009 | -1.31 |     | <i>Crispld1</i>                                 | cysteine-rich secretory protein LCCL domain containing 1                              | 0006325 // face morphogenesis // not recorded                                                                                                       |
| 44.30608            | 34.54517            |              |               | 0.009 | -1.31 |     | <i>D14Ert016e</i>                               | DNA segment, Chr 14, ERATO Doi 16, expressed                                          |                                                                                                                                                     |
| 2942.6              | 2202.6              | NM_001291108 | ///NM         | 0.009 | -1.31 |     | <i>Dynlrb1</i>                                  | dynein light chain roadblock-type 1                                                   | 0006810 // transport // inferred from electronic annotation /// 0007632 // visual behavior // not recorded /// 00081                                |
| 964.6669            | 730.3289            | NM_001004363 |               | 0.007 | -1.31 |     | <i>Nuak1</i>                                    | NUAK family, SNF1-like kinase, 1                                                      | 0006468 // protein phosphorylation // not recorded /// 0006974 // cellular response to DNA damage stimulus // inf                                   |
| 156.2616            | 125.32957           | NM_019833    | ///XM_0       | 0.010 | -1.31 |     | <i>Fam69b</i>                                   | family with sequence similarity 69, member B                                          | 0005783 // endoplasmic reticulum // inferred from electronic annotation /// 0005789 // endoplasmic reticulum me                                     |
| 3318.7725           | 2497.4377           | NM_016753    |               | 0.003 | -1.31 |     | <i>Lxn</i>                                      | latexin                                                                               | 0006954 // inflammatory response // inferred from electronic annotation /// 0010466 // negative regulation of pep                                   |
| 320.244             | 247.02145           | NM_018797    | ///XM_0       | 0.006 | -1.31 |     | <i>Plxnc1</i>                                   | plexin C1                                                                             | 0007165 // signal transduction // inferred from electronic annotation /// 0007275 // multicellular organismal devel                                 |
| 384.0148            | 294.40323           | NM_029339    |               | 0.002 | -1.31 |     | <i>Cdc101</i>                                   | coiled-coil domain containing 101                                                     | 0006351 // transcription, DNA-templated // inferred from electronic annotation /// 0006355 // regulation of transcr                                 |
| 1307.3048           | 981.4865            | NM_026474    |               | 0.002 | -1.31 |     | <i>Sugt1</i>                                    | SGT1, suppressor of G2 allele of SKP1 (S. cerevisiae)                                 | 0005515 // protein binding // inferred from electronic annotation                                                                                   |
| 358.14755           | 274.22086           | NM_028354    | ///XM_0       | 0.002 | -1.31 |     | <i>Tdp1</i>                                     | tyrosyl-DNA phosphodiesterase 1                                                       | 0000012 // single strand break repair // inferred from mutant phenotype /// 0000012 // single strand break repair /                                 |
| 206.38547           | 163.76834           | NM_029037    |               | 0.005 | -1.31 |     | <i>Pomk</i>                                     | protein-O-mannose kinase                                                              | 0001764 // neuron migration // inferred from mutant phenotype /// 0006468 // protein phosphorylation // inferre                                     |
| 40.81918            | 31.549173           | NM_001033223 | ///NM         | 0.003 | -1.32 |     | <i>Lin7a</i>                                    | lin-7 homolog A (C. elegans)                                                          | 0006810 // transport // inferred from electronic annotation /// 0006887 // exocytosis // inferred from electronic an                                |
| 321.9184            | 247.47173           | NM_025904    |               | 0.004 | -1.32 |     | <i>Yae1d1</i>                                   | Yae1 domain containing 1                                                              |                                                                                                                                                     |
| 1677.59             | 1258.4897           | NM_028260    |               | 0.007 | -1.32 |     | <i>Immp1</i>                                    | IMP1 inner mitochondrial membrane peptidase-like (S. cerevisiae)                      | 0006508 // proteolysis // inferred from electronic annotation /// 0006627 // protein processing involved in protein                                 |
| 1576.7903           | 1184.5223           | NM_021335    |               | 0.002 | -1.32 |     | <i>Snrpb2</i>                                   | U2 small nuclear ribonucleoprotein B                                                  | 0000398 // mRNA splicing, via spliceosome // inferred from electronic annotation /// 0006397 // mRNA processing ,                                   |
| 508.1397            | 383.1983            | NM_026033    |               | 0.004 | -1.32 |     | <i>Gatad1</i>                                   | GATA zinc finger domain containing 1                                                  | 0006355 // regulation of transcription, DNA-templated // inferred from electronic annotation                                                        |
| 454.81827           | 344.5323            | NM_025301    |               | 0.008 | -1.32 |     | <i>Mirpl17</i>                                  | mitochondrial ribosomal protein L17                                                   | 0000002 // mitochondrial genome maintenance // traceable author statement /// 0006412 // translation // not rec                                     |
| 138.9319            | 111.432             | NM_008961    | ///XM_0       | 0.004 | -1.32 |     | <i>Pter</i>                                     | phosphotriesterase related                                                            | 0009056 // catabolic process // inferred from electronic annotation                                                                                 |
| 257.0675            | 200.38725           | NM_001286030 | ///NM         | 0.002 | -1.32 |     | <i>Dhx32</i>                                    | DEAH (Asp-Glu-Ala-His) box polypeptide 32                                             | 0008152 // metabolic process // inferred from electronic annotation                                                                                 |
| 179.49509           | 143.51959           | NM_009062    | ///XM_0       | 0.005 | -1.32 |     | <i>Rgs4</i>                                     | regulator of G-protein signaling 4                                                    | 0007186 // G-protein coupled receptor signaling pathway // traceable author statement /// 0009968 // negative reg                                   |
| 470.15674           | 355.09567           | NM_175535    | ///XM_0       | 0.002 | -1.32 |     | <i>Arhgap20</i>                                 | Rho GTPase activating protein 20                                                      | 0007165 // signal transduction // inferred from electronic annotation /// 0043547 // positive regulation of GTPase a                                |
| 34.29709            | 26.080038           | NM_007741    |               | 0.002 | -1.32 |     | <i>Col9a2</i>                                   | collagen, type IX, alpha 2                                                            | 0005576 // extracellular region // inferred from electronic annotation /// 0005578 // proteinaceous extracellular m                                 |
| 372.35675           | 283.19815           | NM_028812    | ///XM_0       | 0.001 | -1.32 |     | <i>Gtf2e1</i>                                   | general transcription factor II E, polypeptide 1 (alpha subunit)                      | 0006351 // transcription, DNA-templated // inferred from electronic annotation /// 0006355 // regulation of transcr                                 |
| 287.86557           | 222.41658           | NM_001004361 | ///NM         | 0.002 | -1.32 |     | <i>Tpgs2</i>                                    | tubulin polyglutamylation complex subunit 2                                           | 0005737 // cytoplasm // inferred from electronic annotation /// 0005856 // cytoskeleton // inferred from electronic                                 |
| 1024.6508           | 769.35126           | NM_001083316 | ///NM         | 0.008 | -1.32 |     | <i>Pdgfra</i>                                   | platelet derived growth factor receptor, alpha polypeptide                            | 0001553 // luteinization // inferred from genetic interaction /// 0001553 // luteinization // inferred from mutant ph                               |
| 443.96613           | 335.73587           | NM_025582    |               | 0.006 | -1.32 |     | <i>Fam213b</i>                                  | family with sequence similarity 213, member B                                         | 0001516 // prostaglandin biosynthetic process // inferred from direct assay /// 0006629 // lipid metabolic process /                                |
| 292.38272           | 225.41544           | NM_027256    | ///XM_0       | 0.002 | -1.32 |     | <i>Ints4</i>                                    | integrator complex subunit 4                                                          | 0005488 // binding // inferred from electronic annotation /// 0005515 // protein binding // inferred from electronic                                |
| 907.28186           | 679.8016            | NM_001164155 | ///NM         | 0.006 | -1.32 |     | <i>Tnfrsf19</i>                                 | tumor necrosis factor receptor superfamily, member 19                                 | 0001942 // hair follicle development // inferred from genetic interaction /// 0043123 // positive regulation of I- $\kappa$ B                       |
| 61.947998           | 48.295303           | NR_045780    |               | 0.003 | -1.33 |     | <i>Zfp652os</i>                                 | zinc finger protein 652, opposite strand                                              |                                                                                                                                                     |
| 258.80014           | 199.8342            | NM_001038230 | ///NM         | 0.002 | -1.33 |     | <i>Anapc11</i>                                  | anaphase promoting complex subunit 11                                                 | 0007049 // cell cycle // inferred from electronic annotation /// 0007067 // mitotic nuclear division // inferred from                               |
| 107.020515          | 85.44347            | NM_001035354 | ///NM         | 0.006 | -1.33 |     | <i>Layn</i>                                     | laylin                                                                                | 0005540 // hyaluronic acid binding // not recorded /// 0030246 // carbohydrate binding // inferred from electronic                                  |
| 1219.4607           | 908.34406           | NM_175526    | ///XM_0       | 0.006 | -1.33 |     | <i>Clec1a</i>                                   | C-type lectin domain family 1, member a                                               | 0030246 // carbohydrate binding // inferred from electronic annotation                                                                              |
| 91.95072            | 73.07658            | NM_026740    |               | 0.002 | -1.33 |     | <i>Slc46a1</i>                                  | solute carrier family 46, member 1                                                    | 0006810 // transport // inferred from electronic annotation /// 0015884 // folic acid transport // not recorded /// 00                              |
| 205.46031           | 161.19536           | NM_022419    |               | 0.010 | -1.33 |     | <i>Abhd8</i>                                    | abhydrolase domain containing 8                                                       | 0008152 // metabolic process // inferred from electronic annotation                                                                                 |
| 582.2013            | 435.2796            | NM_029353    | ///XM_0       | 0.006 | -1.33 |     | <i>Malsu1</i>                                   | mitochondrial assembly of ribosomal large subunit 1                                   | 0042273 // ribosomal large subunit biogenesis // not recorded /// 0070130 // negative regulation of mitochondrial                                   |
| 842.72205           | 627.8816            | NM_146236    | ///XM_0       | 0.007 | -1.33 |     | <i>Tceal1</i>                                   | transcription elongation factor A (SII)-like 1                                        | 0006351 // transcription, DNA-templated // inferred from electronic annotation /// 0006355 // regulation of transcr                                 |
| 184.22528           | 145.36548           | NM_177292    |               | 0.002 | -1.33 |     | <i>Wscd2</i>                                    | WSC domain containing 2                                                               | 0016020 // membrane // inferred from electronic annotation /// 0016021 // integral component of membrane // in                                      |
| 332.28314           | 251.74788           | NM_178407    | ///XM_0       | 0.009 | -1.33 |     | <i>Arap2</i>                                    | ARFgap with RhoGAP domain, ankyrin repeat and PH domain 2                             | 0007165 // signal transduction // inferred from electronic annotation /// 0032312 // regulation of ARF GTPase activ                                 |
| 62.405388           | 48.419334           | NM_013788    |               | 0.009 | -1.33 |     | <i>Peg12</i>                                    | paternally expressed 12                                                               | 0005578 // embryonic axis specification // inferred from direct assay /// 0016055 // Wnt signaling pathway // infer                                 |
| 337.7341            | 256.47308           | NM_026933    |               | 0.010 | -1.33 |     | <i>Triap1</i>                                   | TP53 regulated inhibitor of apoptosis 1                                               | 0006810 // transport // inferred from electronic annotation /// 0006869 // lipid transport // inferred from electroni                               |
| 577.74335           | 431.9178            | NM_027181    | ///XM_0       | 0.010 | -1.33 |     | <i>Gm6851</i> /// <i>Gm7301</i> /// <i>Pin4</i> | predicted pseudogene 6851 /// predicted gene 7301 /// protein (peptidyl-prolyl cis/tr | 0000413 // protein peptidyl-prolyl isomerization // inferred from electronic annotation /// 0006364 // rRNA proces                                  |

| [Nrf2-KO, Air, PBS] [Nrf2-KO, Air, SFN] RefSeq Transcript ID | p                          | FC    | PBS:SFN | Gene Symbol         | Gene Title                                                                                           | Gene Ontology                                                                                                       |
|--------------------------------------------------------------|----------------------------|-------|---------|---------------------|------------------------------------------------------------------------------------------------------|---------------------------------------------------------------------------------------------------------------------|
| 1507.0249                                                    | 1115.6831 NM_026027        | 0.002 | -1.33   | <i>Pfdn1</i>        | prefoldin 1                                                                                          | 0006457 // protein folding // inferred from electronic annotation//00021537 // telencephalon development // infe    |
| 333.24176                                                    | 252.68587 NM_198622        | 0.007 | -1.33   | <i>H1fx</i>         | H1 histone family, member X                                                                          | 0006334 // nucleosome assembly // inferred from electronic annotation                                               |
| 308.87                                                       | 234.86922 NM_178683//XXM_O | 0.006 | -1.33   | <i>Depdc1b</i>      | DEP domain containing 1B                                                                             | 0007165 // signal transduction // inferred from electronic annotation//0035556 // intracellular signal transduction |
| 145.13907                                                    | 115.28207 NM_019496        | 0.005 | -1.33   | <i>Ammecr1</i>      | Alport syndrome, mental retardation, midface hypoplasia and elliptocytosis chromosomal region gene 1 | 0006181 // transport // inferred from electronic annotation//0008152 // metabolic process // inferred from elect    |
| 905.43353                                                    | 674.23114 NM_001038592//NN | 0.001 | -1.33   | <i>Glxr2</i>        | glutaredoxin 2 (thioltransferase)                                                                    | 0006281 // DNA repair // inferred from electronic annotation//0006310 // DNA recombination // inferred from el      |
| 123.114204                                                   | 98.10153 NM_177752//XXM_O  | 0.001 | -1.34   | <i>Eme1</i>         | essential meiotic endonuclease 1 homolog 1 (S. pombe)                                                | 0007054 // mitochondrion morphogenesis // inferred from mutant phenotype                                            |
| 631.705                                                      | 470.5964 NM_026389//XR_38  | 0.001 | -1.34   | <i>Poldip2</i>      | polymerase (DNA-directed), delta interacting protein 2                                               | 0001188 // inactivation of MAPK activity // inferred from direct assay//0006469 // negative regulation of protein   |
| 385.67322                                                    | 290.74564 NM_024438        | 0.001 | -1.34   | <i>Dusp19</i>       | dual specificity phosphatase 19                                                                      | 0030324 // lung development // inferred from electronic annotation                                                  |
| 2123.547                                                     | 1552.8875 NM_175503        | 0.007 | -1.34   | <i>Aard</i>         | alanine and arginine rich domain containing protein                                                  | 0003779 // actin binding // not recorded//0005515 // protein binding // inferred from physical interaction//00051   |
| 280.47403                                                    | 214.833 NM_080451//XXM_O   | 0.008 | -1.34   | <i>Synpo2</i>       | synaptopodin 2                                                                                       | 0003009 // skeletal muscle contraction // not recorded//0006941 // striated muscle contraction // inferred from :   |
| 125.17739                                                    | 99.526985 NM_028001//XXM_O | 0.001 | -1.34   | <i>Jsrp1</i>        | junctional sarcoplasmic reticulum protein 1                                                          |                                                                                                                     |
| 444.32578                                                    | 333.25278 NM_001093759//NN | 0.002 | -1.34   | <i>Trappc13</i>     | trafficking protein particle complex 13                                                              |                                                                                                                     |
| 80.734375                                                    | 63.63642 NM_031183//XXM_O  | 0.004 | -1.34   | <i>Gm11532//Sp6</i> | ----//Mus musculus adult male testis cDNA, RIKEN full-length enriched library, clone                 | 0006351 // transcription, DNA-templated // inferred from electronic annotation//0006355 // regulation of transcr    |
| 1090.2358                                                    | 799.1294 NM_026904//XXM_O  | 0.001 | -1.34   | <i>Anapc10</i>      | anaphase promoting complex subunit 10                                                                | 0007049 // cell cycle // inferred from electronic annotation//0007067 // mitotic nuclear division // inferred from  |
| 2230.1128                                                    | 1612.0186 NM_021896//XXM_O | 0.003 | -1.34   | <i>Gucy1a3</i>      | guanylate cyclase 1, soluble, alpha 3                                                                | 0006182 // cGMP biosynthetic process // inferred from mutant phenotype//0006182 // cGMP biosynthetic proce          |
| 77.53497                                                     | 60.74349 NM_001159289//NN  | 0.007 | -1.35   | <i>Bcl11a</i>       | B cell CLL/lymphoma 11A (zinc finger protein)                                                        | 0006351 // transcription, DNA-templated // inferred from electronic annotation//0006355 // regulation of transcr    |
| 374.49072                                                    | 280.0011 NM_139291//XXM_O  | 0.002 | -1.35   | <i>Cdc26</i>        | cell division cycle 26                                                                               | 0007049 // cell cycle // inferred from electronic annotation//0007067 // mitotic nuclear division // inferred from  |
| 525.8893                                                     | 388.74933 NM_146188//XXM_O | 0.002 | -1.35   | <i>Kctd15</i>       | potassium channel tetramerisation domain containing 15                                               | 0007275 // multicellular organismal development // inferred from electronic annotation//0051260 // protein hom      |
| 52.727173                                                    | 39.983593 NM_144809//XXM_O | 0.009 | -1.35   | <i>Prdm9</i>        | PR domain containing 9                                                                               | 0006311 // meiotic gene conversion // not recorded//0006351 // transcription, DNA-templated // inferred from e      |
| 155.33177                                                    | 121.84986 NM_008836//XR_03 | 0.007 | -1.35   | <i>Phxr5</i>        | per-hexamer repeat gene 5                                                                            |                                                                                                                     |
| 22.407635                                                    | 16.37769 NM_025732//XXM_O  | 0.001 | -1.36   | <i>Ankrd61</i>      | ankyrin repeat domain 61                                                                             | 0003677 // DNA binding // inferred from electronic annotation//0005515 // protein binding // inferred from elect    |
| 34.08868                                                     | 25.10627 NM_001163691//NN  | 0.001 | -1.36   | <i>Cacna1h</i>      | calcium channel, voltage-dependent, T type, alpha 1H subunit                                         | 0006810 // transport // inferred from electronic annotation//0006811 // ion transport // inferred from electronic   |
| 121.592545                                                   | 94.95176 NM_146041//XXM_O  | 0.002 | -1.36   | <i>Gmids</i>        | GDP-mannose 4, 6-dehydratase                                                                         | 0007219 // Notch signaling pathway // inferred from sequence or structural similarity//0019673 // GDP-mannose       |
| 1800.4291                                                    | 1306.4193 NM_023223        | 0.006 | -1.36   | <i>Cdc20</i>        | cell division cycle 20                                                                               | 0007049 // cell cycle // inferred from electronic annotation//0007067 // mitotic nuclear division // inferred from  |
| 110.34057                                                    | 85.95164 NM_001122822//NN  | 0.002 | -1.36   | <i>Wrn</i>          | Werner syndrome homolog (human)                                                                      | 0000723 // telomere maintenance // inferred from genetic interaction//0000723 // telomere maintenance // infe       |
| 475.57684                                                    | 349.3024 NM_001033132//NN  | 0.009 | -1.36   | <i>Comm46</i>       | COMM domain containing 6                                                                             | 0032088 // negative regulation of NF-kappaB transcription factor activity // not recorded                           |
| 768.7931                                                     | 558.8233 NM_025569//NN_O   | 0.006 | -1.36   | <i>Mgst3</i>        | microsomal glutathione S-transferase 3                                                               | 0008152 // metabolic process // --//0008152 // metabolic process // inferred from electronic annotation//00055      |
| 1736.8685                                                    | 1260.1621 NM_025387//XXM_O | 0.005 | -1.36   | <i>Tmem14c</i>      | transmembrane protein 14C                                                                            | 0006783 // heme biosynthetic process // inferred from electronic annotation                                         |
| 330.44254                                                    | 246.32713 NM_009791//XXM_O | 0.008 | -1.36   | <i>Aspm</i>         | asp (abnormal spindle)-like, microcephaly associated (Drosophila)                                    | 0001764 // neuron migration // inferred from genetic interaction//0001764 // neuron migration // inferred from      |
| 426.0496                                                     | 315.11758 NM_001111025//NN | 0.001 | -1.36   | <i>Pigx</i>         | phosphatidylinositol glycan anchor biosynthesis, class X                                             | 0006506 // GPI anchor biosynthetic process // inferred from electronic annotation                                   |
| 245.00476                                                    | 184.7495 NM_010255//XXM_O  | 0.005 | -1.36   | <i>Gamt</i>         | guanineacacetate methyltransferase                                                                   | 0006601 // creatine biosynthetic process // inferred from mutant phenotype//0006601 // creatine biosynthetic p      |
| 50.294907                                                    | 37.466606 NM_008023        | 0.001 | -1.37   | <i>Foxb2</i>        | forkhead box B2                                                                                      | 0000122 // negative regulation of transcription from RNA polymerase II promoter // not recorded//0006351 // tri     |
| 166.62358                                                    | 129.84332 NM_008001//XXM_O | 0.008 | -1.37   | <i>Fgd1</i>         | FYVE, RhoGEF and PH domain containing 1                                                              | 0007010 // cytoskeleton organization // inferred from direct assay//0008360 // regulation of cell shape // inferre  |
| 439.23337                                                    | 322.7223 NM_053159         | 0.006 | -1.37   | <i>Mrpl3</i>        | mitochondrial ribosomal protein L3                                                                   | 0006412 // translation // not recorded                                                                              |
| 386.2567                                                     | 284.17725 NM_001190448//NN | 0.007 | -1.37   | <i>Ddc</i>          | dopa decarboxylase                                                                                   | 0006520 // cellular amino acid metabolic process // inferred from electronic annotation//0007623 // circadian rh    |
| 1970.7715                                                    | 1402.2107 NM_026065//XXM_O | 0.003 | -1.37   | <i>Mrpl42</i>       | mitochondrial ribosomal protein L42                                                                  | 0044822 // poly(A) RNA binding // not recorded                                                                      |
| 225.99126                                                    | 170.91162 NM_011851        | 0.009 | -1.37   | <i>Nt5e</i>         | 5' nucleotidase, ecto                                                                                | 0006164 // purine nucleotide biosynthetic process // not recorded//0006196 // AMP catabolic process // inferred     |
| 537.7537                                                     | 390.30692 NM_001195338//NN | 0.002 | -1.37   | <i>Bbip1</i>        | B5Some interacting protein 1                                                                         | 0042384 // cilium assembly // not recorded//0042755 // eating behavior // inferred from mutant phenotype//00        |
| 111.102486                                                   | 85.97542 NM_178793//XXM_O  | 0.002 | -1.37   | <i>Ccbe1</i>        | collagen and calcium binding EGF domains 1                                                           | 0001525 // angiogenesis // inferred from electronic annotation//0001946 // lymphangiogenesis // inferred from       |
| 569.5305                                                     | 412.53387 NM_011917//XXM_O | 0.001 | -1.37   | <i>Xrn2</i>         | 5'-3' exoribonuclease 2                                                                              | 0000738 // DNA catabolic process, exonucleolytic // not recorded//0006139 // nucleobase-containing compound         |
| 327.6235                                                     | 241.07658 NM_028133        | 0.002 | -1.38   | <i>Egln3</i>        | egl-9 family hypoxia-inducible factor 3                                                              | 0001666 // response to hypoxia // not recorded//0006915 // apoptotic process // inferred from electronic annota     |
| 161.39618                                                    | 124.33198 NM_001164573//NN | 0.008 | -1.38   | <i>Myo1h</i>        | myosin 1H                                                                                            | 0008152 // metabolic process // inferred from electronic annotation                                                 |
| 127.47597                                                    | 98.30433 NM_011845//XXM_O  | 0.004 | -1.38   | <i>Mid2</i>         | midline 2                                                                                            | 0016567 // protein ubiquitination // inferred from electronic annotation//0032897 // negative regulation of viral   |
| 96.04039                                                     | 73.03002 NM_029942         | 0.010 | -1.38   | <i>Prelid2</i>      | PRELI domain containing 2                                                                            | 0015914 // phospholipid transport // not recorded                                                                   |
| 103.34752                                                    | 78.79734 NM_001081407//NN  | 0.007 | -1.38   | <i>Plb1</i>         | phospholipase B1                                                                                     | 0006629 // lipid metabolic process // inferred from electronic annotation//0006644 // phospholipid metabolic pr     |
| 416.43024                                                    | 302.74265 NM_175432        | 0.000 | -1.39   | <i>Tmem132c</i>     | transmembrane protein 132C                                                                           | 0010923 // negative regulation of phosphatase activity // inferred from sequence or structural similarity           |
| 264.32852                                                    | 196.49113 NM_008137//XXM_O | 0.002 | -1.39   | <i>Gna14</i>        | guanine nucleotide binding protein, alpha 14                                                         | 0006184 // GTP catabolic process // not recorded//0007165 // signal transduction // inferred from electronic ann    |
| 331.20117                                                    | 241.22412 NM_025449        | 0.001 | -1.39   | <i>Nicn1</i>        | nicotin 1                                                                                            | 0005634 // nucleus // inferred from electronic annotation//0005874 // microtubule // inferred from electronic ann   |
| 99.15262                                                     | 75.449936 NM_027010        | 0.001 | -1.39   | <i>Crygf</i>        | crystallin, gamma F                                                                                  | 0001654 // eye development // inferred from mutant phenotype                                                        |
| 777.90686                                                    | 554.2607 NM_020026//XXM_O  | 0.002 | -1.39   | <i>B3galnt1</i>     | UDP-GalNAc:beta-GlcNAc beta 1,3-galactosaminyltransferase, polypeptide 1                             | 0006486 // protein glycosylation // inferred from electronic annotation//0009312 // oligosaccharide biosynthetic    |
| 269.31265                                                    | 199.10187 NM_016662//XR_38 | 0.004 | -1.39   | <i>Mxd3</i>         | Max dimerization protein 3                                                                           | 0006351 // transcription, DNA-templated // inferred from electronic annotation//0006355 // regulation of transcr    |
| 145.31427                                                    | 110.45515 NM_001145949//NN | 0.005 | -1.39   | <i>Dlgap5</i>       | discs, large (Drosophila) homolog-associated protein 5                                               | 0000087 // mitotic M phase // not recorded//0007049 // cell cycle // inferred from electronic annotation//00007     |
| 415.23203                                                    | 301.2986 NM_025566         | 0.004 | -1.39   | <i>Tnfrsf811</i>    | tumor necrosis factor, alpha-induced protein 8-like 1                                                |                                                                                                                     |
| 68.68397                                                     | 51.35937 NM_001142792//NN  | 0.003 | -1.39   | <i>Tmem150b</i>     | transmembrane protein 150B                                                                           | 0016020 // membrane // inferred from electronic annotation//0016021 // integral component of membrane // in         |
| 32.962685                                                    | 23.446203 NM_007500        | 0.005 | -1.39   | <i>Atoh1</i>        | atonal homolog 1 (Drosophila)                                                                        | 0001764 // neuron migration // inferred from mutant phenotype//0006351 // transcription, DNA-templated // in        |
| 1513.469                                                     | 1063.2493 NM_001163522//NN | 0.006 | -1.40   | <i>Emcn</i>         | endomucin                                                                                            | 0001525 // angiogenesis // inferred from sequence or structural similarity//0016337 // single organismal cell-cell  |
| 155.33069                                                    | 117.66943 NM_001013778//XX | 0.003 | -1.40   | <i>Tvp23a</i>       | trans-golgi network vesicle protein 23A                                                              | 0016021 // integral component of membrane // inferred from electronic annotation                                    |
| 2260.7068                                                    | 1571.7618 NM_027395        | 0.002 | -1.40   | <i>Basp1</i>        | brain abundant, membrane attached signal protein 1                                                   | 0045892 // negative regulation of transcription, DNA-templated // not recorded//0045892 // negative regulation      |
| 415.6346                                                     | 299.18332 NM_001135172//NN | 0.008 | -1.40   | <i>C1qtnf7</i>      | C1q and tumor necrosis factor related protein 7                                                      | 0051260 // protein homooligomerization // inferred from direct assay                                                |
| 689.79517                                                    | 487.75818 NM_175429//XXM_O | 0.003 | -1.40   | <i>Kctd12b</i>      | potassium channel tetramerisation domain containing 12b                                              | 0006810 // transport // inferred from electronic annotation//0006811 // ion transport // inferred from electronic   |
| 214.93875                                                    | 160.29922 NM_029798        | 0.010 | -1.40   | <i>Flywch2</i>      | FLYWCH family member 2                                                                               | 0044822 // poly(A) RNA binding // not recorded                                                                      |
| 594.3807                                                     | 420.10086 NM_009848//XXM_O | 0.005 | -1.40   | <i>Entpd1</i>       | ectonucleoside triphosphate diphosphohydrolase 1                                                     | 0006200 // ATP catabolic process // inferred from direct assay//0007186 // G-protein coupled receptor signaling     |
| 216.45532                                                    | 161.25957 NM_001110162//NN | 0.001 | -1.40   | <i>Cdca2</i>        | cell division cycle associated 2                                                                     | 0007049 // cell cycle // inferred from electronic annotation//0007059 // chromosome segregation // inferred from    |
| 391.05972                                                    | 281.36353 NM_172911        | 0.005 | -1.40   | <i>D8Erd82e</i>     | DNA segment, Chr 8, ERATO Doi 82, expressed                                                          | 0006468 // protein phosphorylation // inferred from electronic annotation//0016310 // phosphorylation // infern     |
| 514.2754                                                     | 366.67722 NM_031863//XXM_O | 0.007 | -1.40   | <i>Cenpq</i>        | centromere protein Q                                                                                 | 0000775 // chromosome, centromeric region // inferred from electronic annotation//0005634 // nucleus // not re      |
| 123.98846                                                    | 93.721504 NM_008550//XXM_O | 0.007 | -1.40   | <i>Man2b2</i>       | mannosidase 2, alpha B2                                                                              | 0005975 // carbohydrate metabolic process // inferred from electronic annotation//0006013 // mannose metabo         |
| 154.26088                                                    | 116.62781 NM_019517//XXM_O | 0.001 | -1.40   | <i>Bace2</i>        | beta-site APP-cleaving enzyme 2                                                                      | 0006508 // proteolysis // inferred from electronic annotation//0006509 // membrane protein ectodomain proteo        |
| 153.0885                                                     | 115.90007 NM_029102//XXM_O | 0.003 | -1.41   | <i>Glt8d2</i>       | glycosyltransferase 8 domain containing 2                                                            | 0008152 // metabolic process // inferred from electronic annotation                                                 |
| 390.39645                                                    | 280.12698 NM_001290660//NN | 0.008 | -1.41   | <i>Cd302</i>        | CD302 antigen                                                                                        | 0006909 // phagocytosis // not recorded                                                                             |
| 953.11487                                                    | 669.10876 NM_001285833//NN | 0.006 | -1.41   | <i>Nax4</i>         | NADPH oxidase 4                                                                                      | 0000902 // cell morphogenesis // inferred from mutant phenotype//0001666 // response to hypoxia // inferred fr      |
| 168.86012                                                    | 126.63981 NM_025864        | 0.003 | -1.41   | <i>Tmem206</i>      | transmembrane protein 206                                                                            | 0016020 // membrane // inferred from electronic annotation//0016021 // integral component of membrane // in         |



| [Nrf2-KO, Air, PBS] | [Nrf2-KO, Air, SFN] | RefSeq            | Transcript ID | p     | FC    | PBS:SFN | Gene Symbol         | Gene Title                                                                           | Gene Ontology                                                                                                        |
|---------------------|---------------------|-------------------|---------------|-------|-------|---------|---------------------|--------------------------------------------------------------------------------------|----------------------------------------------------------------------------------------------------------------------|
| 1962.9341           | 1367.4845           | NM_001012335///NM |               | 0.003 | -1.41 |         | <b>Mdk</b>          | midkine                                                                              | 0001662 // behavioral fear response // inferred from mutant phenotype///0007275 // multicellular organismal de       |
| 470.00073           | 332.3818            | NM_024273///XM_0  |               | 0.001 | -1.42 |         | <b>Timmcd1</b>      | translocase of inner mitochondrial membrane domain containing 1                      | 0005634 // nucleus // not recorded///0005739 // mitochondrion // inferred from direct assay///0005739 // mitoch      |
| 385.82672           | 275.2029            | NM_030206         |               | 0.007 | -1.42 |         | <b>Cygb</b>         | cytoglobin                                                                           | 0006810 // transport // inferred from electronic annotation///0006979 // response to oxidative stress // not recor   |
| 20.431938           | 14.452564           | NM_178797///XM_0  |               | 0.009 | -1.42 |         | <b>Far2</b>         | fatty acyl CoA reductase 2                                                           | 0006629 // lipid metabolic process // inferred from electronic annotation///0006694 // steroid biosynthetic proce    |
| 238.75812           | 174.8036            | NM_029532///XM_0  |               | 0.002 | -1.42 |         | <b>Snrnp35</b>      | small nuclear ribonucleoprotein 35 (U11/U12)                                         | 0006397 // mRNA processing // inferred from electronic annotation///0008380 // RNA splicing // inferred from ele     |
| 572.60443           | 402.72873           | NM_026282///XR_37 |               | 0.006 | -1.42 |         | <b>Spc24</b>        | SPC24, NDC80 kinetochore complex component, homolog (S. cerevisiae)                  | 0007049 // cell cycle // inferred from electronic annotation///0007067 // mitotic nuclear division // inferred from  |
| 75.08952            | 55.27078            | NM_029741///XM_0  |               | 0.001 | -1.42 |         | <b>Ppflia3</b>      | protein tyrosine phosphatase, receptor type, f polypeptide (PTPRF), interacting prot | 0007269 // neurotransmitter secretion // not recorded///0048172 // regulation of short-term neuronal synaptic pl     |
| 66.133415           | 47.96016            | NM_001040695///NM |               | 0.003 | -1.42 |         | <b>Uevld</b>        | UEV and lactate/malate dehydrogenase domains                                         | 0005975 // carbohydrate metabolic process // inferred from electronic annotation///0006464 // cellular protein m     |
| 171.16832           | 127.0191            | NM_001081328      |               | 0.001 | -1.42 |         | <b>Chsy3</b>        | chondroitin sulfate synthase 3                                                       | 0008152 // metabolic process // inferred from electronic annotation                                                  |
| 333.6103            | 236.88177           | NM_001161618///NM |               | 0.000 | -1.42 |         | <b>Cul5</b>         | culin 5                                                                              | 0006511 // ubiquitin-dependent protein catabolic process // inferred from electronic annotation///0006970 // res     |
| 738.95154           | 513.9807            | NM_173047         |               | 0.001 | -1.42 |         | <b>Cbr3</b>         | carbonyl reductase 3                                                                 | 0008152 // metabolic process // inferred from electronic annotation///0042376 // phyloquinone catabolic proces       |
| 220.60121           | 161.55362           | NM_025962         |               | 0.010 | -1.43 |         | <b>Mmachc</b>       | methylmalonic aciduria cblC type, with homocystinuria                                | 0009236 // cobalamin biosynthetic process // inferred from electronic annotation                                     |
| 151.97545           | 112.48833           | NM_152817///XM_0  |               | 0.001 | -1.43 |         | <b>Ttc27</b>        | tetratricopeptide repeat domain 27                                                   | 0005515 // protein binding // inferred from electronic annotation                                                    |
| 301.6617            | 216.92056           | NM_001290430///NM |               | 0.005 | -1.43 |         | <b>Ftsj1</b>        | FtsJ homolog 1 (E. coli)                                                             | 0001510 // RNA methylation // inferred from electronic annotation///0002128 // tRNA nucleoside ribose methylat       |
| 147.6291            | 108.6102            | NM_026992///NR_03 |               | 0.008 | -1.43 |         | <b>Onajc24</b>      | Dnaj (Hsp40) homolog, subfamily C, member 24                                         | 0006810 // transport // inferred from electronic annotation///0017183 // peptidyl-dipthamide biosynthetic proce      |
| 1268.8545           | 873.6018            | NM_007428         |               | 0.002 | -1.43 |         | <b>Agt</b>          | angiotensinogen (serpin peptidase inhibitor, clade A, member 8)                      | 0001543 // ovarian follicle rupture // inferred from mutant phenotype///0001568 // blood vessel development // i     |
| 279.01852           | 199.68459           | NM_007467         |               | 0.004 | -1.43 |         | <b>Apip1</b>        | amyloid beta (A4) precursor-like protein 1                                           | 0006378 // mRNA polyadenylation // inferred from direct assay///0006417 // regulation of translation // inferred f   |
| 360.3249            | 252.59795           | NM_001079847///NM |               | 0.008 | -1.43 |         | <b>Gpr64</b>        | G protein-coupled receptor 64                                                        | 0007165 // signal transduction // inferred from electronic annotation///0007166 // cell surface receptor signaling i |
| 107.3546            | 79.08241            | NM_007426         |               | 0.001 | -1.44 |         | <b>Angpt2</b>       | angiopoietin 2                                                                       | 0001525 // angiogenesis // inferred from genetic interaction///0001666 // response to hypoxia // inferred from el    |
| 113.00433           | 83.67344            | NM_177878         |               | 0.002 | -1.44 |         | <b>Mblac1</b>       | metallo-beta-lactamase domain containing 1                                           | 0008152 // metabolic process // inferred from electronic annotation                                                  |
| 5645.628            | 3857.808            | NM_053247         |               | 0.009 | -1.44 |         | <b>Lyve1</b>        | lymphatic vessel endothelial hyaluronan receptor 1                                   | 0006027 // glycosaminoglycan catabolic process // inferred from direct assay///0006810 // transport // inferred fr   |
| 121.45598           | 89.89753            | NM_001012324      |               | 0.001 | -1.44 |         | <b>Ecm2</b>         | extracellular matrix protein 2, female organ and adipocyte specific                  | 0010811 // positive regulation of cell-substrate adhesion // inferred from direct assay///0030198 // extracellular m |
| 891.39557           | 612.89484           | NM_053267         |               | 0.004 | -1.44 |         | <b>Selm</b>         | selenoprotein M                                                                      | 0010269 // response to selenium ion // inferred from mutant phenotype///0035264 // multicellular organism grov       |
| 555.9156            | 384.99414           | NM_026526///XM_0  |               | 0.001 | -1.44 |         | <b>N6amt2</b>       | N-6 adenine-specific DNA methyltransferase 2 (putative)                              | 0032259 // methylation // inferred from electronic annotation                                                        |
| 250.12187           | 179.43602           | NM_001077713      |               | 0.007 | -1.44 |         | <b>Acn9</b>         | ACN9 homolog (S. cerevisiae)                                                         | 0005739 // mitochondrion // inferred from electronic annotation///0005758 // mitochondrial intermembrane spa         |
| 237.71887           | 171.39177           | NM_178149///XM_0  |               | 0.002 | -1.44 |         | <b>Pik3ip1</b>      | phosphoinositide-3-kinase interacting protein 1                                      | 0014067 // negative regulation of phosphatidylinositol 3-kinase signaling // inferred from direct assay///0014067 // |
| 63.661663           | 45.763233           | NM_008764         |               | 0.005 | -1.44 |         | <b>Tnfrsf11b</b>    | tumor necrosis factor receptor superfamily, member 11b (osteoprotegerin)             | 0006915 // apoptotic process // inferred from electronic annotation///0007165 // signal transduction // inferred fr  |
| 339.59152           | 239.31725           | NM_001044741///NM |               | 0.002 | -1.44 |         | <b>Cacnb3</b>       | calcium channel, voltage-dependent, beta 3 subunit                                   | 0006810 // transport // inferred from electronic annotation///0006811 // ion transport // inferred from electronic   |
| 268.11597           | 190.65865           | NM_007215         |               | 0.004 | -1.45 |         | <b>Chst7</b>        | carbohydrate (N-acetylglucosamine) sulfotransferase 7                                | 0005975 // carbohydrate metabolic process // inferred from electronic annotation///0006044 // N-acetylglucosam       |
| 164.04744           | 120.011406          | NM_001168318///NM |               | 0.007 | -1.45 |         | <b>Scara5</b>       | scavenger receptor class A, member 5 (putative)                                      | 0006810 // transport // inferred from electronic annotation///0006811 // ion transport // inferred from electronic   |
| 687.8254            | 473.63486           | NM_053134         |               | 0.004 | -1.45 |         | <b>Pcdhb9</b>       | protocadherin beta 9                                                                 | 0007155 // cell adhesion // inferred from electronic annotation///0007156 // homophilic cell adhesion // inferred    |
| 1108.9451           | 758.71906           | NM_054042         |               | 0.003 | -1.45 |         | <b>Cd248</b>        | CD248 antigen, endosalin                                                             | 0008284 // positive regulation of cell proliferation // inferred from mutant phenotype///0016477 // cell migration   |
| 137.27562           | 100.30771           | NM_011427         |               | 0.007 | -1.45 |         | <b>Snai1</b>        | snail family zinc finger 1                                                           | 0000122 // negative regulation of transcription from RNA polymerase II promoter // inferred from direct assay///0    |
| 68.82652            | 49.30296            | NM_001166645      |               | 0.001 | -1.45 |         | <b>Zfp882</b>       | zinc finger protein 882                                                              | 0006355 // regulation of transcription, DNA-templated // inferred from electronic annotation                         |
| 81.829              | 59.284855           | NM_001035509///NM |               | 0.000 | -1.45 |         | <b>Zcchc18</b>      | zinc finger, CCHC domain containing 18                                               | 0030509 // BMP signaling pathway // not recorded                                                                     |
| 185.50455           | 135.20992           | NM_019438///XR_37 |               | 0.007 | -1.45 |         | <b>Ncapg</b>        | non-SMC condensin I complex, subunit G                                               | 0007076 // mitotic chromosome condensation // not recorded                                                           |
| 690.9488            | 471.4112            | NM_008005///NR_1C |               | 0.000 | -1.45 |         | <b>Fgf18</b>        | fibroblast growth factor 18                                                          | 0001503 // ossification // inferred from mutant phenotype///0001525 // angiogenesis // inferred from mutant phe      |
| 265.34882           | 188.1758            | NM_001033409///XM |               | 0.002 | -1.46 |         | <b>Lgr6</b>         | leucine-rich repeat-containing G protein-coupled receptor 6                          | 0007165 // signal transduction // inferred from electronic annotation///0007186 // G-protein coupled receptor sig    |
| 483.5801            | 331.87967           | NM_008289         |               | 0.003 | -1.46 |         | <b>Hsd11b2</b>      | hydroxysteroid 11-beta dehydrogenase 2                                               | 0001666 // response to hypoxia // inferred from electronic annotation///0002017 // regulation of blood volume by     |
| 23.81685            | 16.12452            | NM_178678         |               | 0.009 | -1.46 |         | <b>Lrrtm3</b>       | leucine rich repeat transmembrane neuronal 3                                         | 1902004 // positive regulation of beta-amyloid formation // inferred from mutant phenotype///1902004 // positiv      |
| 342.65283           | 238.53189           | NM_009773///XM_0  |               | 0.008 | -1.46 |         | <b>Bub1b</b>        | budding uninhibited by benzimidazoles 1 homolog, beta (S. cerevisiae)                | 0006468 // protein phosphorylation // inferred from electronic annotation///0006915 // apoptotic process // infer    |
| 78.83165            | 56.429066           | NM_001081224///XM |               | 0.004 | -1.46 |         | <b>Prr16</b>        | proline rich 16                                                                      |                                                                                                                      |
| 283.43787           | 199.3061            | NM_024245///XM_0  |               | 0.005 | -1.46 |         | <b>Klf23</b>        | kinasin family member 23                                                             | 0000910 // cytokinesis // not recorded///0007018 // microtubule-based movement // inferred from electronic anr       |
| 63.59395            | 44.91379            | NM_001166631///NM |               | 0.001 | -1.47 |         | <b>Havcr1</b>       | hepatitis A virus cellular receptor 1                                                | 0033005 // positive regulation of mast cell activation // inferred from direct assay                                 |
| 272.941             | 191.12143           | NM_029790///XM_0  |               | 0.004 | -1.47 |         | <b>Mettl15</b>      | methyltransferase like 15                                                            | 0032259 // methylation // inferred from electronic annotation                                                        |
| 109.840904          | 79.17547            | NR_028264         |               | 0.000 | -1.47 |         | <b>Dleu2</b>        | deleted in lymphocytic leukemia, 2                                                   | 0010977 // negative regulation of neuron projection development // inferred from genetic interaction///0014043,      |
| 69.909775           | 49.55919            | NM_010692         |               | 0.000 | -1.47 |         | <b>Lbx2</b>         | ladybird homeobox homolog 2 (Drosophila)                                             | 0006351 // transcription, DNA-templated // inferred from electronic annotation///0006355 // regulation of transcr    |
| 1923.5459           | 1284.3878           | NM_001013753///XM |               | 0.009 | -1.47 |         | <b>Pcdh17</b>       | protocadherin 17                                                                     | 0007155 // cell adhesion // inferred from electronic annotation///0007156 // homophilic cell adhesion // inferred    |
| 127.83292           | 92.35753            | NM_019950         |               | 0.001 | -1.48 |         | <b>Chst5</b>        | carbohydrate (N-acetylglucosamine 6-O) sulfotransferase 5                            | 0005975 // carbohydrate metabolic process // inferred from electronic annotation///0006044 // N-acetylglucosam       |
| 125.35397           | 89.58526            | NM_182783         |               | 0.003 | -1.48 |         | <b>Fam167b</b>      | family with sequence similarity 167, member B                                        |                                                                                                                      |
| 178.85297           | 128.3001            | NM_001199293///NM |               | 0.001 | -1.48 |         | <b>Tex14</b>        | testis expressed gene 14                                                             | 0006468 // protein phosphorylation // inferred from electronic annotation///0007049 // cell cycle // inferred from   |
| 771.8504            | 513.0981            | NM_008939         |               | 0.002 | -1.48 |         | <b>Prss12</b>       | protease, serine 12 neurotrypsin (motopsin)                                          | 0006508 // proteolysis // inferred from direct assay///0006508 // proteolysis // inferred from mutant phenotype//    |
| 348.84506           | 239.82242           | NM_021525///XM_0  |               | 0.010 | -1.49 |         | <b>Rcl1</b>         | RNA terminal phosphate cyclase-like 1                                                | 0006364 // rRNA processing // not recorded///0006396 // RNA processing // inferred from electronic annotation//      |
| 226.09624           | 158.50426           | NM_001143683///NM |               | 0.001 | -1.49 |         | <b>Mpped2</b>       | metallophosphoesterase domain containing 2                                           | 0008152 // metabolic process // inferred from electronic annotation                                                  |
| 208.80586           | 146.52118           | NM_001081114///XM |               | 0.001 | -1.50 |         | <b>Clip3</b>        | CAP-GLY domain containing linker protein 3                                           | 0001934 // positive regulation of protein phosphorylation // inferred from direct assay///0010828 // positive regul  |
| 248.34535           | 172.27098           | NM_001168475///NM |               | 0.008 | -1.50 |         | <b>Ttc23</b>        | tetratricopeptide repeat domain 23                                                   | 0005515 // protein binding // inferred from electronic annotation                                                    |
| 101.84433           | 71.86929            | NM_172951///XM_0  |               | 0.009 | -1.50 |         | <b>Sntg2</b>        | syntrophin, gamma 2                                                                  | 0003779 // actin binding // inferred from electronic annotation///0005515 // protein binding // inferred from elec   |
| 554.669             | 366.9357            | NM_178753         |               | 0.000 | -1.50 |         | <b>Spin4</b>        | spindlin family, member 4                                                            | 0007276 // gamete generation // inferred from electronic annotation                                                  |
| 94.122795           | 65.68825            | NM_001271757///NM |               | 0.000 | -1.51 |         | <b>Wnt5b</b>        | wingless-type MMTV integration site family, member 5B                                | 0002062 // chondrocyte differentiation // inferred from electronic annotation///0007165 // signal transduction //    |
| 278.63016           | 191.40471           | NM_001289487///NM |               | 0.005 | -1.51 |         | <b>Exoc314</b>      | exocyst complex component 3-like 4                                                   | 0006887 // exocytosis // inferred from electronic annotation                                                         |
| 265.62103           | 181.28967           | NM_009364///XM_0  |               | 0.004 | -1.52 |         | <b>Tjp2</b>         | tissue factor pathway inhibitor 2                                                    | 0007596 // blood coagulation // inferred from electronic annotation///0007599 // hemostasis // inferred from ele     |
| 1151.1533           | 758.62775           | NM_010423///XM_0  |               | 0.009 | -1.52 |         | <b>Hcy1</b>         | hair/enhancer-of-split related with YRPW motif 1                                     | 0000122 // negative regulation of transcription from RNA polymerase II promoter // inferred from direct assay///0    |
| 214.86055           | 148.62045           | NM_001110512///NM |               | 0.001 | -1.52 |         | <b>Mettl8</b>       | methyltransferase like 8                                                             | 0007519 // skeletal muscle tissue development // inferred from direct assay///0008152 // metabolic process // inf    |
| 463.74387           | 306.95325           | NM_001033331///NM |               | 0.010 | -1.52 |         | <b>Gas2l3</b>       | growth arrest-specific 2 like 3                                                      | 0000226 // microtubule cytoskeleton organization // not recorded///0007050 // cell cycle arrest // inferred from     |
| 101.85328           | 70.21146            | NM_001127233///NM |               | 0.005 | -1.52 |         | <b>Trp53</b>        | transformation related protein 53                                                    | 0000060 // protein import into nucleus, translocation // inferred from direct assay///0000122 // negative regulati   |
| 93.869415           | 64.52021            | NM_010460///NM_0  |               | 0.008 | -1.52 |         | <b>Hoxb7//Hoxb8</b> | homeobox B7//homeobox B8                                                             | 0006351 // transcription, DNA-templated // inferred from electronic annotation///0006355 // regulation of transcr    |
| 42.14293            | 27.84835            | NM_001081651///XM |               | 0.005 | -1.53 |         | <b>Rab42</b>        | RAB42, member RAS oncogene family                                                    | 0007264 // small GTPase mediated signal transduction // inferred from electronic annotation///0015031 // protei      |
| 3557.841            | 2307.1895           | NM_032398         |               | 0.000 | -1.53 |         | <b>Pivap</b>        | plasmalemma vesicle associated protein                                               | 0000165 // MAPK cascade // not recorded///0002693 // positive regulation of cellular extravasation // inferred fr    |
| 2217.2612           | 1414.6968           | NM_001008497///NM |               | 0.004 | -1.53 |         | <b>P2ry14</b>       | purinergic receptor P2Y, G-protein coupled, 14                                       | 0006955 // immune response // not recorded///0007165 // signal transduction // inferred from electronic annotat      |
| 133.75133           | 93.684616           | NM_013811///XM_0  |               | 0.009 | -1.53 |         | <b>Onah8</b>        | dynein, axonemal, heavy chain 8                                                      | 0006200 // ATP catabolic process // inferred from electronic annotation///0007018 // microtubule-based moveme        |
| 110.893295          | 76.06643            | NM_009116///XM_0  |               | 0.005 | -1.53 |         | <b>Prrx2</b>        | paired related homeobox 2                                                            | 0002053 // positive regulation of mesenchymal cell proliferation // inferred from genetic interaction///0006355 //   |

| [Nrf2-KO, Air, PBS] | [Nrf2-KO, Air, SFN] | RefSeq Transcript ID | p     | FC PBS:SFN | Gene Symbol    | Gene Title                                                                                   | Gene Ontology                                                                                                                                                                                                                         |
|---------------------|---------------------|----------------------|-------|------------|----------------|----------------------------------------------------------------------------------------------|---------------------------------------------------------------------------------------------------------------------------------------------------------------------------------------------------------------------------------------|
| 152.97404           | 105.081436          | NM_011270            | 0.000 | -1.54      | <i>Rhd</i>     | Rh blood group, D antigen                                                                    | 0015696 // ammonium transport // inferred from mutant phenotype//0048821 // erythrocyte development // inferred from electronic annotation                                                                                            |
| 226.04362           | 154.1083            | NM_013552//XM_01     | 0.002 | -1.54      | <i>Hmnmr</i>   | hyaluronan mediated motility receptor (RHAMM)                                                | 0000160 // phosphorelay signal transduction system // inferred from electronic annotation                                                                                                                                             |
| 208.20135           | 142.04077           | NM_011943//XM_01     | 0.006 | -1.54      | <i>Map2k6</i>  | mitogen-activated protein kinase kinase 6                                                    | 0000165 // MAPK cascade // not recorded//0000165 // MAPK cascade // inferred from physical interaction//0000097237 // cellular response to toxic substance // inferred from mutant phenotype                                          |
| 235.67747           | 158.48277           | NM_178890            | 0.007 | -1.55      | <i>Abtb2</i>   | ankyrin repeat and BTB (POZ) domain containing 2                                             | 0005975 // carbohydrate metabolic process // inferred from electronic annotation                                                                                                                                                      |
| 66.024605           | 43.979137           | NM_001081257//XM_01  | 0.005 | -1.56      | <i>Hpse2</i>   | heparanase 2                                                                                 | 0006816 // calcium ion transport // inferred from direct assay//0006935 // chemotaxis // inferred from direct assay                                                                                                                   |
| 96.50908            | 65.044495           | NM_001281859//NM_01  | 0.002 | -1.56      | <i>Cysltr1</i> | cysteinyl leukotriene receptor 1                                                             | 0005576 // extracellular region // inferred from electronic annotation                                                                                                                                                                |
| 106.63459           | 72.27501            | NM_001039554//XM_01  | 0.002 | -1.56      | <i>Angptl7</i> | angiotensin-like 7                                                                           | 0000209 // protein polyubiquitination // not recorded//0009411 // response to UV // inferred from direct assay//0006810 // transport // inferred from electronic annotation//0006869 // lipid transport // inferred from direct assay |
| 459.28854           | 296.07187           | NM_001161782//NM_01  | 0.002 | -1.57      | <i>Trim32</i>  | tripartite motif-containing 32                                                               | 0000132 // establishment of mitotic spindle orientation // inferred from genetic interaction//0000187 // activation of cell cycle // not recorded                                                                                     |
| 2627.7434           | 1645.6454           | NM_026730//XM_01     | 0.003 | -1.57      | <i>Gpihbp1</i> | GPI-anchored HDL-binding protein 1                                                           | 0007059 // chromosome segregation // not recorded                                                                                                                                                                                     |
| 148.71043           | 100.89615           | NM_008002            | 0.001 | -1.57      | <i>Fgf10</i>   | fibroblast growth factor 10                                                                  | 0001666 // response to hypoxia // inferred from mutant phenotype//0006508 // proteolysis // inferred from direct assay                                                                                                                |
| 1063.8348           | 666.0999            | NM_026753            | 0.007 | -1.59      | <i>Fam96b</i>  | family with sequence similarity 96, member B                                                 | 0001764 // neuron migration // inferred from genetic interaction//0001764 // neuron migration // inferred from direct assay                                                                                                           |
| 554.43036           | 349.15582           | NM_008872//XM_01     | 0.003 | -1.59      | <i>Plat</i>    | plasminogen activator, tissue                                                                | 0010906 // regulation of glucose metabolic process // inferred from direct assay//0035774 // positive regulation of cell cycle // not recorded                                                                                        |
| 77.80748            | 51.41216            | NM_010014//NM_01     | 0.001 | -1.59      | <i>Dab1</i>    | disabled 1                                                                                   | 0006730 // one-carbon metabolic process // inferred from electronic annotation//0006979 // response to oxidative stress // not recorded                                                                                               |
| 908.5482            | 561.06116           | NM_026125//XM_01     | 0.007 | -1.60      | <i>Fam132a</i> | family with sequence similarity 132, member A                                                | 0001649 // osteoblast differentiation // inferred from expression pattern//0001775 // cell activation // not recorded                                                                                                                 |
| 65.46931            | 41.820446           | NM_007606            | 0.001 | -1.60      | <i>Car3</i>    | carbonic anhydrase 3                                                                         | 0008152 // metabolic process // inferred from electronic annotation//0010800 // positive regulation of peptidyl-tyrosine phosphorylation // not recorded                                                                              |
| 2056.5046           | 1261.5541           | NM_001111274//NM_01  | 0.004 | -1.61      | <i>Igf1</i>    | insulin-like growth factor 1                                                                 | 0000166 // nucleotide binding // inferred from electronic annotation//0003676 // nucleic acid binding // inferred from electronic annotation                                                                                          |
| 102.78103           | 66.57678            | NM_030728//XM_01     | 0.005 | -1.61      | <i>Cemip</i>   | cell migration inducing protein, hyaluronan binding                                          | 0005515 // protein binding // inferred from electronic annotation                                                                                                                                                                     |
| 331.3779            | 210.5923            | NM_029007            | 0.001 | -1.62      | <i>Fam84a</i>  | family with sequence similarity 84, member A                                                 | 0002221 // pattern recognition receptor signaling pathway // not recorded//0002376 // immune system process // inferred from electronic annotation                                                                                    |
| 168.87688           | 110.31698           | NM_001101479//XM_01  | 0.001 | -1.62      | <i>Pabpc4l</i> | poly(A) binding protein, cytoplasmic 4-like                                                  | 0006198 // cAMP catabolic process // not recorded//0007165 // signal transduction // inferred from electronic annotation                                                                                                              |
| 65.818535           | 41.88387            | NM_001103367//NM_01  | 0.000 | -1.62      | <i>Rai2</i>    | retinoic acid induced 2                                                                      | 0002931 // response to ischemia // inferred from mutant phenotype//0006508 // proteolysis // inferred from electronic annotation                                                                                                      |
| 128.29865           | 82.591              | NM_001159711//NM_01  | 0.001 | -1.63      | <i>Ly96</i>    | lymphocyte antigen 96                                                                        | 0000902 // cell morphogenesis // inferred from mutant phenotype//0001816 // cytokine production // inferred from electronic annotation                                                                                                |
| 118.47577           | 76.61016            | NM_001009978//NM_01  | 0.001 | -1.64      | <i>Pde1a</i>   | phosphodiesterase 1A, calmodulin-dependent                                                   | 0001570 // vasculogenesis // not recorded//0001666 // response to hypoxia // inferred from electronic annotation                                                                                                                      |
| 80.8306             | 51.583954           | NM_173425//XM_01     | 0.002 | -1.64      | <i>Fam124b</i> | family with sequence similarity 124, member B                                                | 0000086 // G2/M transition of mitotic cell cycle // not recorded//0000087 // mitotic M phase // inferred from electronic annotation                                                                                                   |
| 94.2049             | 59.792088           | NM_011670            | 0.007 | -1.64      | <i>Uchl1</i>   | ubiquitin carboxy-terminal hydrolase L1                                                      | 0071222 // cellular response to lipopolysaccharide // inferred from expression pattern                                                                                                                                                |
| 953.23206           | 575.52185           | NM_001111100//NM_01  | 0.006 | -1.66      | <i>Lipa</i>    | lysosomal acid lipase A                                                                      | 0006461 // protein complex assembly // not recorded//0008152 // metabolic process // inferred from electronic annotation                                                                                                              |
| 340.11542           | 207.1582            | NM_009627            | 0.004 | -1.67      | <i>Adm</i>     | adrenomedullin                                                                               | 0006915 // apoptotic process // inferred from electronic annotation//0007605 // sensory perception of sound // inferred from electronic annotation                                                                                    |
| 129.80984           | 81.81148            | NM_009860//XM_01     | 0.005 | -1.67      | <i>Cdc25c</i>  | cell division cycle 25C                                                                      | 0007049 // cell cycle // inferred from electronic annotation//0007067 // mitotic nuclear division // inferred from electronic annotation                                                                                              |
| 95.38972            | 57.462685           | NM_001195084//NM_01  | 0.005 | -1.72      | <i>Plscr2</i>  | phospholipid scramblase 2                                                                    | 0001889 // liver development // inferred from mutant phenotype//0006351 // transcription, DNA-templated // inferred from electronic annotation                                                                                        |
| 337.92392           | 200.06259           | NM_177157            | 0.006 | -1.74      | <i>Gchfr</i>   | GTP cyclohydrolase 1 feedback regulator                                                      | 00119511 // peptidyl-proline hydroxylation // not recorded//0055114 // oxidation-reduction process // not recorded                                                                                                                    |
| 112.232086          | 67.218216           | NM_018769//XM_01     | 0.001 | -1.75      | <i>Dfna5</i>   | deafness, autosomal dominant 5 (human)                                                       | 0006629 // lipid metabolic process // inferred from electronic annotation//0007165 // signal transduction // inferred from electronic annotation                                                                                      |
| 111.56142           | 66.486885           | NM_001042653         | 0.007 | -1.76      | <i>Oip5</i>    | Opa interacting protein 5                                                                    | 0006091 // generation of precursor metabolites and energy // not recorded//0006200 // ATP catabolic process // inferred from electronic annotation                                                                                    |
| 750.7436            | 417.03296           | NM_008250            | 0.002 | -1.79      | <i>Hlx</i>     | H2.0-like homeobox                                                                           | 0006470 // protein dephosphorylation // inferred from electronic annotation//0007049 // cell cycle // inferred from electronic annotation                                                                                             |
| 107.776245          | 63.390053           | NM_177161//XM_01     | 0.009 | -1.80      | <i>P4ha3</i>   | procollagen-proline, 2-oxoglutarate 4-dioxygenase (proline 4-hydroxylase), alpha polypeptide | 0006829 // zinc ion transport // inferred from direct assay//0030001 // metal ion transport // inferred from electronic annotation                                                                                                    |
| 131.0536            | 76.33556            | NM_177355            | 0.006 | -1.84      | <i>Plcx3</i>   | phosphatidylinositol-specific phospholipase C, X domain containing 3                         | 0008152 // metabolic process // inferred from electronic annotation                                                                                                                                                                   |
| 254.54904           | 140.26909           | NM_008813//XM_01     | 0.000 | -1.90      | <i>Enpp1</i>   | ectonucleotide pyrophosphatase/phosphodiesterase 1                                           | 0006952 // defense response // non-traceable author statement//0007157 // heterophilic cell-cell adhesion // not recorded                                                                                                             |
| 278.44623           | 152.16171           | NM_028222//XM_01     | 0.001 | -1.91      | <i>Cdkn3</i>   | cyclin-dependent kinase inhibitor 3                                                          | 0007165 // signal transduction // inferred from electronic annotation//0007186 // G-protein coupled receptor signaling // not recorded                                                                                                |
| 166.40152           | 85.868385           | NM_001039676//XM_01  | 0.009 | -2.03      | <i>Slc39a2</i> | solute carrier family 39 (zinc transporter), member 2                                        | 0005975 // carbohydrate metabolic process // inferred from electronic annotation//0006054 // N-acetylneuraminic acid metabolic process // not recorded                                                                                |
| 111.33941           | 56.383278           | NM_173414            | 0.000 | -2.06      | <i>Lanc13</i>  | LanC lantibiotic synthetase component C-like 3 (bacterial)                                   | 0009972 // cytidine deamination // not recorded//0030308 // negative regulation of cell growth // not recorded, inferred from electronic annotation                                                                                   |
| 111.55397           | 56.51285            | NM_023612            | 0.001 | -2.07      | <i>Esm1</i>    | endothelial cell-specific molecule 1                                                         |                                                                                                                                                                                                                                       |
| 2052.631            | 939.8809            | NM_008342//XM_01     | 0.003 | -2.15      | <i>Igfbp2</i>  | insulin-like growth factor binding protein 2                                                 |                                                                                                                                                                                                                                       |
| 140.03244           | 68.467514           | NM_029847//XM_01     | 0.007 | -2.18      | <i>Arsk</i>    | arylsulfatase K                                                                              |                                                                                                                                                                                                                                       |
| 224.33              | 108.98248           | NM_173422            | 0.003 | -2.19      | <i>Colec10</i> | collectin sub-family member 10                                                               |                                                                                                                                                                                                                                       |
| 288.8033            | 136.99895           | NM_144944            | 0.002 | -2.22      | <i>Prokr2</i>  | prokineticin receptor 2                                                                      |                                                                                                                                                                                                                                       |
| 53.607018           | 21.961576           | NM_172829//XM_01     | 0.005 | -2.44      | <i>St6gal2</i> | beta galactoside alpha 2,6 sialyltransferase 2                                               |                                                                                                                                                                                                                                       |
| 157.1751            | 66.76568            | NM_028176//XM_01     | 0.001 | -2.48      | <i>Cda</i>     | cytidine deaminase                                                                           |                                                                                                                                                                                                                                       |

Table S3. Prenatal sulforaphane-neonatal hyperoxia interaction 258 genes in *Nrf2*<sup>-/-</sup> mice (2-Way ANOVA, p<=0.01)

RIKEN cDNA and predicted genes excluded. Fold Change (FC): Blue (-) - fold lower in SFN:O2 than PBS:O2; Red - fold higher in SFN:O2 than PBS:O2.

| [ICR, Air, PBS] | [ICR, Air, SFN] | [ICR, O2, PBS] | [ICR, O2, SFN] | RefSeq Transcript ID | p | (Prenatal Treatment-Exposure) | FC [Air-PBS: O2-PBS FC] | [O2 PBS-SFN] Gene Symbol | Gene Title                   | Gene Ontology                                                                 |                                                                                                    |
|-----------------|-----------------|----------------|----------------|----------------------|---|-------------------------------|-------------------------|--------------------------|------------------------------|-------------------------------------------------------------------------------|----------------------------------------------------------------------------------------------------|
| 69.962          | 72.55377        | 31.495602      | 73.17308       | NM_0020265//XM_0065  |   |                               | 0.005                   | -2.22                    | <b>2.32 Dkk2</b>             | dickkopf homolog 2 (Xenopus laevis)                                           | 0002376 // immune system process // inferred from electronic annotation//0006810 // transpor       |
| 1435.3619       | 1514.5039       | 329.68805      | 624.2319       | NM_138738//XM_0065   |   |                               | 0.002                   | -4.35                    | <b>1.89 Prr35</b>            | protease, serine 35                                                           | 0001889 // liver development // inferred from electronic annotation//0006725 // cellular aroma     |
| 1782.2644       | 1798.7755       | 1049.2744      | 1986.1266      | NM_001198811//NM_1   |   |                               | 0.008                   | -1.70                    | <b>1.89 Frem1</b>            | Fras1 related extracellular matrix protein 1                                  | 0007155 // cell adhesion // inferred from electronic annotation//0031016 // pancreas developm      |
| 343.08368       | 283.36444       | 147.0619       | 273.31763      | NM_019662//XM_0065   |   |                               | 0.004                   | -2.33                    | <b>1.86 Rad</b>              | Ras-related associated with diabetes                                          | 0006629 // lipid metabolic process // inferred from electronic annotation//0016042 // lipid catal  |
| 12.493289       | 13.344014       | 12.067748      | 21.504776      | NM_173427//NR_0355   |   |                               | 0.009                   | -1.04                    | <b>1.78 Kihdc7a//Mir2139</b> | kelch domain containing 7a//microRNA 2139                                     | 0008152 // metabolic process // inferred from electronic annotation//0016310 // phosphorylati      |
| 2220.1902       | 1995.4437       | 1351.5511      | 2271.5432      | NM_001163577//NM_0   |   |                               | 0.007                   | -1.64                    | <b>1.68 Prom1</b>            | prominin 1                                                                    | 0000122 // negative regulation of transcription from RNA polymerase II promoter // inferred from   |
| 289.77322       | 328.9068        | 393.5178       | 649.8168       | NM_001081322//XM_0   |   |                               | 0.002                   | <b>1.36</b>              | <b>1.65 Myo5c</b>            | myosin VC                                                                     | 0006468 // protein phosphorylation // not recorded//0006811 // ion transport // inferred from c    |
| 14.985249       | 13.548375       | 11.287953      | 18.416538      | NR_045273            |   |                               | 0.007                   | -1.33                    | <b>1.63 Med9s</b>            | mediator complex subunit 9, opposite strand                                   | 0034220 // ion transmembrane transport // not recorded                                             |
| 182.24828       | 164.31073       | 124.71969      | 200.49524      | NM_178908            |   |                               | 0.007                   | -1.46                    | <b>1.61 Fam26e</b>           | family with sequence similarity 26, member E                                  | 001656 // metanephros development // inferred from sequence or structural similarity//00016        |
| 153.06573       | 143.52809       | 98.77891       | 149.83705      | NM_181815//XM_0065   |   |                               | 0.008                   | -1.55                    | <b>1.52 Cep128</b>           | centrosomal protein 128                                                       | 0009887 // organ morphogenesis // inferred from mutant phenotype//0018149 // peptide cross         |
| 285.66928       | 308.43195       | 296.21262      | 443.75516      | NM_029022//XM_0065   |   |                               | 0.003                   | <b>1.04</b>              | <b>1.50 Scrn3</b>            | secernin 3                                                                    | 0007155 // cell adhesion // inferred from electronic annotation//0007156 // homophilic cell adh    |
| 38.758457       | 32.76064        | 39.00012       | 57.417824      | NM_011136            |   |                               | 0.004                   | <b>1.01</b>              | <b>1.47 Pou2af1</b>          | POU domain, class 2, associating factor 1                                     | 0001503 // ossification // not recorded//0006874 // cellular calcium ion homeostasis // traceabl   |
| 414.32886       | 354.26688       | 255.0949       | 375.13043      | NM_001146031//NM_1   |   |                               | 0.002                   | -1.62                    | <b>1.47 Nrcam</b>            | neuron-glia-CAM-related cell adhesion molecule                                | 0005576 // extracellular region // inferred from electronic annotation//0005737 // cytoplasm //    |
| 212.25095       | 213.30676       | 175.44528      | 257.22845      | NM_194269//XM_0065   |   |                               | 0.009                   | -1.21                    | <b>1.47 Morn2</b>            | MORN repeat containing 2                                                      | 0042552 // myelination // not recorded//1902043 // positive regulation of extrinsic apoptotic sig  |
| 21.415405       | 18.123074       | 23.46498       | 34.23301       | NM_001013756//XM_0   |   |                               | 0.006                   | <b>1.10</b>              | <b>1.46 Grhl3</b>            | grainyhead-like 3 (Drosophila)                                                | 0044237 // cellular metabolic process // inferred from electronic annotation//0055114 // oxidati   |
| 744.06445       | 696.336         | 373.4801       | 542.73157      | NM_023245            |   |                               | 0.001                   | -1.99                    | <b>1.45 Palm</b>             | palmdelphin                                                                   |                                                                                                    |
| 274.52957       | 272.0314        | 272.9089       | 388.82977      | NM_008884//NM_1780   |   |                               | 0.000                   | -1.01                    | <b>1.42 Pml</b>              | promyelocytic leukemia                                                        | 0006810 // transport // inferred from electronic annotation//0006811 // ion transport // inferre   |
| 11671.783       | 11961.448       | 8171.2534      | 11585.314      | NM_0119759           |   |                               | 0.006                   | -1.43                    | <b>1.42 Dpt</b>              | dermatopontin                                                                 | 0006352 // DNA-templated transcription, initiation // inferred from electronic annotation//0006    |
| 2468.152        | 2428.5479       | 1506.5468      | 2106.177       | NM_054041//XM_0065   |   |                               | 0.008                   | -1.64                    | <b>1.40 Antsr1</b>           | anthrax toxin receptor 1                                                      | 0008088 // axon cargo transport // inferred from mutant phenotype//0008152 // metabolic pro        |
| 1153.7617       | 1322.3784       | 1018.6307      | 1423.494       | NM_007984            |   |                               | 0.002                   | -1.13                    | <b>1.40 Fcnr1</b>            | fascin homolog 1, actin bundling protein (Strongylocentrotus purpuratus)      | 0008152 // metabolic process // inferred from electronic annotation//0032254 // establishment      |
| 235.98412       | 232.56755       | 241.1119       | 329.556        | NM_001163464//NM_0   |   |                               | 0.009                   | <b>1.02</b>              | <b>1.37 Abi3</b>             | ABI gene family, member 3                                                     | 0006417 // regulation of translation // inferred from electronic annotation//0016070 // RNA mei    |
| 313.80157       | 295.3039        | 382.37112      | 522.4244       | NM_133234//XM_0065   |   |                               | 0.007                   | <b>1.22</b>              | <b>1.37 Bbc3</b>             | BCL2 binding component 3                                                      | 0006355 // regulation of transcription, DNA-templated // not recorded                              |
| 557.9463        | 540.34314       | 537.37665      | 730.9747       | NM_0093151//XM_0065  |   |                               | 0.002                   | -1.04                    | <b>1.36 Tafj6</b>            | TAF6 RNA polymerase II, TATA box binding protein (TBP)-associated factor      | 0002238 // response to molecule of fungal origin // inferred from mutant phenotype//0002376 /      |
| 353.16513       | 395.15637       | 369.247        | 495.5319       | NM_017391            |   |                               | 0.008                   | <b>1.05</b>              | <b>1.34 Slcsa3</b>           | solute carrier family 5 (inositol transporters), member 3                     | 0001934 // positive regulation of protein phosphorylation // not recorded//0002376 // immune       |
| 97.9636         | 104.04598       | 68.37857       | 90.27526       | NM_031998//XM_0065   |   |                               | 0.009                   | -1.43                    | <b>1.32 Cep41</b>            | centrosomal protein 41                                                        | 0006351 // transcription, DNA-templated // inferred from electronic annotation//0006355 // reg     |
| 276.13083       | 270.76517       | 172.2666       | 226.55972      | NM_001081243//XM_0   |   |                               | 0.000                   | -1.60                    | <b>1.32 Filip1</b>           | filamin A interacting protein 1                                               | 0006355 // regulation of transcription, DNA-templated // not recorded                              |
| 158.55287       | 172.46252       | 80.823364      | 106.18038      | NM_00110162//NM_1    |   |                               | 0.006                   | -1.96                    | <b>1.31 Cdc42</b>            | cell division cycle associated 2                                              | 005739 // mitochondrion // inferred from direct assay//0016020 // membrane // inferred from        |
| 147.0618        | 163.17853       | 165.08623      | 216.28656      | NM_199449            |   |                               | 0.003                   | <b>1.12</b>              | <b>1.31 Zhx2</b>             | zinc fingers and homeoboxes 2                                                 | 0006412 // translation // not recorded                                                             |
| 615.59863       | 645.599         | 511.9526       | 669.8806       | NM_009288//XM_0065   |   |                               | 0.005                   | -1.20                    | <b>1.31 Shk1</b>             | serine/threonine kinase 10                                                    | 0006310 // DNA recombination // inferred from electronic annotation//0006810 // transport // i     |
| 310.10034       | 306.23703       | 250.48381      | 323.60477      | NM_001290701//NM_0   |   |                               | 0.008                   | -1.24                    | <b>1.29 Meaf6</b>            | MYST/Esa1-associated factor 6                                                 | 0001836 // release of cytochrome c from mitochondria // not recorded//0001836 // release of c      |
| 48.34705        | 41.120743       | 37.52458       | 47.858074      | NM_144786//XM_0064   |   |                               | 0.006                   | -1.29                    | <b>1.28 Ggt7</b>             | gamma-glutamyltransferase 7                                                   | 0005515 // protein binding // inferred from physical interaction//0008022 // protein C-terminu     |
| 4880.149        | 4793.979        | 4049.3477      | 5153.279       | NM_01170981//NM_0    |   |                               | 0.000                   | -1.21                    | <b>1.27 Hmnpkc</b>           | heterogeneous nuclear ribonucleoprotein C                                     | 0006928 // cellular component movement // not recorded//0007155 // cell adhesion // not reco       |
| 19.93411        | 17.67726        | 15.712506      | 19.89045       | NM_025420//XM_0065   |   |                               | 0.001                   | -1.27                    | <b>1.27 Lec1m</b>            | late cornified envelope 1M                                                    | 0016567 // protein ubiquitination // inferred from electronic annotation                           |
| 309.1059        | 247.5186        | 313.42593      | 396.6182       | NM_153143            |   |                               | 0.006                   | <b>1.01</b>              | <b>1.27 Kctd11</b>           | potassium channel tetramerisation domain containing 11                        | 0007010 // cytoskeleton organization // inferred from electronic annotation//0051693 // actin fi   |
| 1425.3546       | 1387.6141       | 1091.5663      | 1372.098       | NM_177715//NR_0395f  |   |                               | 0.006                   | -1.31                    | <b>1.26 Kctd12//Mir5130</b>  | potassium channel tetramerisation domain containing 12//microRNA 5130         | 0000054 // ribosomal subunit export from nucleus // inferred from electronic annotation//0006      |
| 2518.802        | 2448.97         | 1718.7509      | 2158.0605      | NM_009450            |   |                               | 0.002                   | -1.47                    | <b>1.26 Tubb2a</b>           | tubulin, beta 2A class IIa                                                    | 0007165 // signal transduction // inferred from electronic annotation//0007186 // G-protein cou    |
| 730.66693       | 715.09106       | 572.08075      | 943.2594       | NM_001130149//NM_0   |   |                               | 0.002                   | <b>1.03</b>              | <b>1.25 Droshea</b>          | drosha, ribonuclease type III                                                 | 0000226 // microtubule cytoskeleton organization // not recorded//0010923 // negative regulat      |
| 252.06018       | 245.30936       | 235.94566      | 291.79364      | NM_026641//XM_0065   |   |                               | 0.007                   | -1.07                    | <b>1.24 Ift80</b>            | intraflagellar transport 80                                                   | 0006810 // transport // inferred from electronic annotation//0006817 // phosphate ion transpor     |
| 240.73627       | 227.8107        | 198.6216       | 243.10745      | NM_001165951//NM_1   |   |                               | 0.010                   | -1.21                    | <b>1.22 Vangl1</b>           | vang-like 1 (van gogh, Drosophila)                                            | 0016020 // membrane // inferred from electronic annotation//0016021 // integral component o        |
| 467.52026       | 421.4644        | 506.38968      | 619.50287      | NM_009029//XM_0065   |   |                               | 0.010                   | <b>1.08</b>              | <b>1.22 Rb1</b>              | retinoblastoma 1                                                              | 0006412 // translation // inferred from electronic annotation//0032543 // mitochondrial transl     |
| 389.43506       | 343.54913       | 246.42226      | 300.32742      | NM_177906//XM_0065   |   |                               | 0.001                   | -1.58                    | <b>1.22 Opclm</b>            | opiotin binding protein/cell adhesion molecule-like                           | 0016020 // membrane // inferred from electronic annotation//0016021 // integral component o        |
| 1617.7766       | 1402.6871       | 563.3106       | 686.4046       | NM_023223            |   |                               | 0.004                   | -2.87                    | <b>1.22 Cdc20</b>            | cell division cycle 20                                                        | 0006591 // ornithine metabolic process // inferred from direct assay//0006596 // polyamine bio     |
| 250.1217        | 239.53566       | 204.21277      | 246.47789      | NM_029790//XM_0065   |   |                               | 0.006                   | -1.22                    | <b>1.21 Mett15</b>           | methyltransferase like 15                                                     | 0016020 // membrane // inferred from electronic annotation//0016021 // integral component o        |
| 1382.3983       | 1401.8483       | 1098.0057      | 1320.7719      | NM_026057//XM_0065   |   |                               | 0.009                   | -1.26                    | <b>1.20 Zfp422</b>           | zinc finger protein 422                                                       | 0006464 // cellular protein modification process // inferred from direct assay//0008152 // metal   |
| 275.35104       | 253.32229       | 253.2326       | 377.73175      | NM_001081054//XR_38  |   |                               | 0.003                   | <b>1.14</b>              | <b>1.20 Qrs1</b>             | glutaminyl-tRNA synthetase (glutamine-hydrolyzing)-like 1                     | 0000122 // negative regulation of transcription from RNA polymerase II promoter // inferred from   |
| 234.62373       | 185.58629       | 203.69936      | 343.78697      | NM_001162947//NM_0   |   |                               | 0.008                   | -1.15                    | <b>1.20 Nek3</b>             | NIMA (never in mitosis gene a)-related expressed kinase 3                     | 0045454 // cell redox homeostasis // inferred from electronic annotation//0055114 // oxidation-    |
| 313.12923       | 322.58344       | 324.98703      | 388.3312       | NM_001006122//NM_0   |   |                               | 0.007                   | <b>1.04</b>              | <b>1.19 Leo1</b>             | Leo1, Paf1/RNA polymerase II complex component, homolog (S. cerevisiae)       | 0006810 // transport // inferred from electronic annotation//0006811 // ion transport // inferre   |
| 1405.0721       | 1398.3351       | 1507.5071      | 1798.3237      | NM_010305            |   |                               | 0.009                   | <b>1.07</b>              | <b>1.19 Gnao1</b>            | guanine nucleotide binding protein (G protein), alpha inhibiting 1            | 0001916 // positive regulation of T cell mediated cytotoxicity // inferred from direct assay//0001 |
| 583.93726       | 556.37476       | 2041.3582      | 2420.064       | NM_010145            |   |                               | 0.004                   | <b>3.50</b>              | <b>1.19 Ephx1</b>            | epoxide hydrolase 1, microsomal                                               | 0001736 // establishment of planar polarity // inferred from genetic interaction//0006351 // trar  |
| 140.51112       | 136.01991       | 142.88734      | 168.73933      | NM_001159948//NM_0   |   |                               | 0.009                   | <b>1.02</b>              | <b>1.18 Als2</b>             | amyotrophic lateral sclerosis 2 (juvenile)                                    | 0015937 // coenzyme A biosynthetic process // inferred from electronic annotation//0016310 //      |
| 125.8917        | 123.12924       | 110.34735      | 129.88864      | NM_025473//XM_0065   |   |                               | 0.009                   | -1.14                    | <b>1.18 Fam3a</b>            | family with sequence similarity 3, member A                                   | 0000082 // G1/S transition of mitotic cell cycle // inferred from mutant phenotype//0000122 // t   |
| 92.37111        | 68.36415        | 86.19487       | 101.24989      | NM_019577//XM_0065   |   |                               | 0.007                   | -1.07                    | <b>1.17 Ccl24</b>            | chemokine (C-C motif) ligand 24                                               | 0006397 // mRNA processing // inferred from electronic annotation//0008380 // RNA splicing //      |
| 21.38159        | 17.56756        | 13.705908      | 16.02138       | NM_001037906         |   |                               | 0.005                   | -1.56                    | <b>1.17 Nell1</b>            | NEL-like 1                                                                    | 0006184 // GTP catabolic process // not recorded//0007049 // cell cycle // inferred from elect     |
| 335.91214       | 347.8988        | 289.04532      | 337.23972      | NM_145221//XM_0065   |   |                               | 0.001                   | -1.16                    | <b>1.17 App1</b>             | adaptor protein, phosphotyrosine interaction, PH domain and leucine zipper co | 0001824 // blastocyst development // inferred from direct assay                                    |
| 21.299736       | 19.633522       | 20.586864      | 23.849493      | NR_003283            |   |                               | 0.003                   | -1.03                    | <b>1.16 Rab11fp4a51</b>      | RAB11 family interacting protein 4 (class II), opposite strand 1              | 0005737 // cytoplasm // inferred from electronic annotation//0005813 // centrosome // not rec      |
| 322.906         | 281.8248        | 247.32037      | 283.85355      | NM_001276719//NM_0   |   |                               | 0.005                   | -1.31                    | <b>1.15 Akr2</b>             | atypical chemokine receptor 2                                                 | 0006184 // GTP catabolic process // not recorded//0006886 // intracellular protein transport // i  |
| 265.85815       | 261.5832        | 256.9423       | 294.46765      | NM_053177//XR_37867  |   |                               | 0.004                   | -1.03                    | <b>1.15 Mcoln1</b>           | mucopolin 1                                                                   | 0000910 // cytokinesis // not recorded//0006351 // transcription, DNA-templated // inferred fr     |
| 44.707375       | 38.64207        | 32.335384      | 36.822876      | NM_010050            |   |                               | 0.003                   | -1.38                    | <b>1.14 Dia2</b>             | deiodinase, iodothyronine, type II                                            | 0006020 // inositol metabolic process // inferred from mutant phenotype//0006412 // translati      |
| 725.8644        | 656.58636       | 729.48694      | 826.66895      | NM_001190343//NM_0   |   |                               | 0.003                   | <b>1.00</b>              | <b>1.13 Ccm2</b>             | cerebral cavernous malformation 2                                             | 0006351 // transcription, DNA-templated // inferred from electronic annotation//0006355 // reg     |
| 71.6419         | 58.942333       | 57.64307       | 65.162         | NM_026956//XM_0065   |   |                               | 0.000                   | -1.24                    | <b>1.13 Cd209f</b>           | CD209f antigen                                                                | 0001711 // endodermal cell fate commitment // inferred from mutant phenotype//0006351 // ti        |
| 1607.85         | 1282.958        | 1874.1724      | 2114.7388      | NM_001177556//NM_0   |   |                               | 0.003                   | <b>1.17</b>              | <b>1.13 Gng12</b>            | guanine nucleotide binding protein (G protein), gamma 12                      | 0006508 // proteolysis // inferred from electronic annotation                                      |
| 79.64633        | 65.18264        | 75.69151       | 85.17433       | NM_013606//NR_0035f  |   |                               | 0.009                   | -1.05                    | <b>1.13 Mx2</b>              | myxovirus (influenza virus) resistance 2                                      | 0006370 // 7-methylguanosine mRNA capping // not recorded//0006397 // mRNA processing //           |
| 293.9439        | 267.09634       | 246.3518       | 276.8707       | NM_001033533         |   |                               | 0.005                   | -1.19                    | <b>1.12 Cdc4102a</b>         | coiled-coil domain containing 102A                                            | 0048565 // digestive tract development // not recorded                                             |
| 52.722187       | 47.619675       | 40.566326      | 45.47538       | NM_001001985         |   |                               | 0.010                   | -1.30                    | <b>1.12 Nat8l</b>            | N-acetyltransferase 8-like                                                    | 0001539 // cilium or flagellum-dependent cell motility // inferred from sequence or structural sim |
| 286.68628       | 266.12122       | 292.28632      | 323.16782      | NM_028276            |   |                               | 0.009                   | <b>1.02</b>              | <b>1.11 Utp14a</b>           | UTP14, U3 small nucleolar ribonucleoprotein, homolog A (yeast)                | 0006396 // RNA processing // inferred from electronic annotation//0010468 // regulation of gen     |
| 193.88818       | 167.13765       | 164.93602      | 181.00475      | NM_146248            |   |                               | 0.008                   | -1.18                    | <b>1.10 Cchcr1</b>           | coiled-coil alpha-helical rod protein 1                                       | 0001525 // angiogenesis // inferred from electronic annotation//0001938 // positive regulation c   |
| 278.44363       | 248.53651       | 179.86086      | 195.88142      | NM_001004361//NM_0   |   |                               | 0.008                   | -1.55                    | <b>1.09 Tpgs2</b>            | tubulin polyglutamylation complex subunit 2                                   | 0018108 // peptidyl-tyrosine phosphorylation // not recorded//0030334 // regulation of cell mig    |
| 1635.2136       | 1568.6636       | 1344.5557      | 1459.1736      | NM_024189//NR_0283f  |   |                               | 0.009                   | -1.22                    | <b>1.09 Yaf2</b>             | YY1 associated factor 2                                                       | 0006351 // transcription, DNA-templated // inferred from electronic annotation//0006355 // reg     |
| 93.102594       | 858.81775       | 749.127        | 811.437        | NM_009774//XM_0065   |   |                               | 0.008                   | -1.24                    | <b>1.08 Bub3</b>             | budding uninhibited by benzimidazoles 3 homolog (S. cerevisiae)               | 0006364 // rRNA processing // inferred from electronic annotation//0042254 // ribosome bioger      |
| 19.268366       | 13.963492       | 15.410205      | 16.68665       | NM_001164682//NM_1   |   |                               | 0.006                   | -1.25                    | <b>1.08 Mpp4</b>             | membrane protein, palmitoylated 4 (MAGUK p55 subfamily member 4)              | 0001921 // positive regulation of receptor recycling // inferred from direct assay//0006461 // pr  |
| 4359.0586       | 4262.3184       | 4032.455       | 4360.5083      | NM_133933            |   |                               | 0.008                   | -1.08                    | <b>1.08 Rpn1</b>             | ribophorin I                                                                  | 0007219 // Notch signaling pathway // inferred from electronic annotation//0034976 // respons      |
| 262             |                 |                |                |                      |   |                               |                         |                          |                              |                                                                               |                                                                                                    |

| [ICR, Air, PBS] | [ICR, Air, SFN] | [ICR, O2, PBS] | [ICR, O2, SFN] | RefSeq Transcript ID | p (Prenatal Treatment-Exposure) | FC [Air-PBS: O2-PBS] | FC [O2 PBS:SFN] | Gene Symbol                        | Gene Title                                                                       | Gene Ontology                                                                                      |
|-----------------|-----------------|----------------|----------------|----------------------|---------------------------------|----------------------|-----------------|------------------------------------|----------------------------------------------------------------------------------|----------------------------------------------------------------------------------------------------|
| 22.082022       | 16.430124       | 18.113605      | 18.805227      | NM_010666            |                                 | 0.006                | -1.22           | <b>1.04 Krt27</b>                  | keratin 27                                                                       | 0001568 // blood vessel development // inferred from mutant phenotype//0001570 // vasculog         |
| 33.819256       | 27.008427       | 29.399582      | 30.436289      | NM_001129803//NM_0   |                                 | 0.005                | -1.15           | <b>1.04 Pcp2</b>                   | Purkinje cell protein 2 (L7)                                                     | 0006355 // regulation of transcription, DNA-templated // not recorded                              |
| 89.95629        | 72.791016       | 77.12211       | 78.526535      | NM_153424//XM_0065   |                                 | 0.004                | -1.17           | <b>1.02 Nph4p</b>                  | nephronophthisis 4 (juvenile) homolog (human)                                    | 0001666 // response to hypoxia // inferred from mutant phenotype//0001666 // response to hyp       |
| 27.035168       | 21.454285       | 21.628815      | 21.964022      |                      |                                 | 0.003                | -1.25           | <b>1.02 AK007819//Gm13594</b>      | Mus musculus 10 day old male pancreas cDNA, RIKEN full-length enriched libra     | 0000301 // retrograde transport, vesicle recycling within Golgi // not recorded//0007030 // Golg   |
| 88.62353        | 110.10694       | 103.15215      | 104.191345     | NM_001163749//NM_0   |                                 | 0.009                | <b>1.16</b>     | <b>1.01 Camasp3g</b>               | calmodulin regulated spectrin-associated protein family, member 3                | 0006939 // smooth muscle contraction // inferred from electronic annotation//0007165 // signa      |
| 47.30427        | 37.144222       | 40.739414      | 40.724743      | NM_031395//NM_1833   |                                 | 0.005                | -1.16           | <b>-1.00 LOC101055731//LOC1010</b> | synaptotagmin-like protein 3-like//synaptotagmin-like 3                          |                                                                                                    |
| 65.868324       | 46.16065        | 49.529713      | 49.381584      | NM_022888//NM_1768   |                                 | 0.007                | -1.33           | <b>-1.00 Folr4</b>                 | folate receptor 4 (delta)                                                        |                                                                                                    |
| 39.2519         | 31.465635       | 32.18398       | 32.061275      | NM_0111927           |                                 | 0.010                | -1.22           | <b>-1.00 Ceaacm9</b>               | carcinoembryonic antigen-related cell adhesion molecule 9                        | 0006810 // transport // inferred from electronic annotation//0006811 // ion transport // inferre   |
| 163.18095       | 227.16814       | 176.77748      | 175.95743      | NM_026551//XM_0065   |                                 | 0.009                | <b>1.08</b>     | <b>-1.00 Dcokd</b>                 | dephospho-CoA kinase domain containing                                           | 0005515 // protein binding // inferred from electronic annotation                                  |
| 118.85292       | 92.06245        | 100.898254     | 99.16808       | NM_013533//XM_0065   |                                 | 0.009                | -1.18           | <b>-1.02 Gpr162</b>                | G protein-coupled receptor 162                                                   |                                                                                                    |
| 56.095997       | 44.037872       | 46.720684      | 45.61277       | NM_031873            |                                 | 0.003                | -1.20           | <b>-1.02 Tas1r2</b>                | taste receptor, type 1, member 2                                                 | 0040008 // regulation of growth // inferred from electronic annotation                             |
| 17355.703       | 16973.033       | 17531.281      | 17099.68       | NM_025586//NM_0014   |                                 | 0.007                | <b>1.01</b>     | <b>-1.03 Gm10224//Gm4581//Gm</b>   | predicted pseudogene 10224//predicted gene 4581//ribosomal protein L15           | 0006351 // transcription, DNA-templated // inferred from electronic annotation//0006352 // DN      |
| 2154.2534       | 1964.3711       | 2196.0884      | 2141.9155      | NM_009498//XM_0065   |                                 | 0.003                | <b>1.02</b>     | <b>-1.03 Vamp3</b>                 | vesicle-associated membrane protein 3                                            | 0000122 // negative regulation of transcription from RNA polymerase II promoter // inferred from   |
| 3123.0808       | 2694.7559       | 3145.3591      | 3051.4277      | NM_016843            |                                 | 0.008                | <b>1.01</b>     | <b>-1.03 Atnx10</b>                | ataxin 10                                                                        | 0016020 // membrane // inferred from electronic annotation//0016021 // integral component o        |
| 32.235867       | 24.501385       | 28.645557      | 27.645136      | NM_032397//XM_0065   |                                 | 0.000                | -1.13           | <b>-1.04 Kcnn1</b>                 | potassium intermediate/small conductance calcium-activated channel, subfam       | 0002376 // immune system process // inferred from electronic annotation//0006184 // GTP cata       |
| 19.24848        | 15.291763       | 18.533731      | 17.790642      | NM_010054            |                                 | 0.000                | -1.04           | <b>-1.04 Dlx1</b>                  | distal-less homeobox 2                                                           | 0007126 // meiotic nuclear division // inferred from electronic annotation//0007283 // spermatc    |
| 188.40999       | 227.36269       | 234.92706      | 223.7342       | NM_001039084//NM_0   |                                 | 0.009                | <b>1.25</b>     | <b>-1.05 Mrp1</b>                  | mitochondrial ribosomal protein L1                                               | 0001649 // osteoblast differentiation // inferred from genetic interaction//0001649 // osteoblas   |
| 567.57166       | 621.99115       | 756.0955       | 716.8299       | NM_010851            |                                 | 0.008                | <b>1.33</b>     | <b>-1.05 Myd88</b>                 | myeloid differentiation primary response gene 88                                 | 0001938 // positive regulation of endothelial cell proliferation // not recorded//0006935 // cher  |
| 889.5055        | 986.73303       | 956.73944      | 903.91754      | NM_144904//NM_1781   |                                 | 0.005                | <b>1.08</b>     | <b>-1.06 Ptpb3</b>                 | polypyrimidine tract binding protein 3                                           | 0006281 // DNA repair // inferred from electronic annotation//0006310 // DNA recombination //      |
| 712.7494        | 759.6339        | 756.7994       | 676.767        | NM_001039089//NM_0   |                                 | 0.005                | <b>1.02</b>     | <b>-1.07 Sel1l</b>                 | sel-1 suppressor of lin-12-like (C. elegans)                                     | 0006486 // protein glycosylation // inferred from electronic annotation//0018279 // protein N-li   |
| 169.6576        | 194.38829       | 241.40405      | 221.69081      | NM_001100449//XM_0   |                                 | 0.006                | <b>1.42</b>     | <b>-1.09 Taf4b</b>                 | TAF4B RNA polymerase II, TATA box binding protein (TBP)-associated factor        | 0000045 // autophagic vacuole assembly // not recorded//0001843 // neural tube closure // infe     |
| 90.67312        | 114.59314       | 132.84761      | 121.66651      | NM_025782//NM_0272   |                                 | 0.001                | <b>1.47</b>     | <b>-1.09 Tct39b</b>                | tetratricopeptide repeat domain 39B                                              | 0000724 // double-strand break repair via homologous recombination // not recorded//0006281        |
| 21.2384         | 21.939253       | 19.181307      | 17.497442      | NM_020274            |                                 | 0.001                | -1.11           | <b>-1.10 Htr3b</b>                 | 5-hydroxytryptamine (serotonin) receptor 3B                                      |                                                                                                    |
| 94.800545       | 75.86157        | 94.42467       | 85.864525      | NM_172794//XM_0065   |                                 | 0.000                | <b>1.00</b>     | <b>-1.10 Zfp454</b>                | zinc finger protein 454                                                          | 0006810 // transport // inferred from electronic annotation//0006811 // ion transport // inferre   |
| 2079.7288       | 2153.2583       | 2137.7793      | 1942.9963      | NM_011051//XM_0065   |                                 | 0.008                | <b>1.03</b>     | <b>-1.10 Pcd6d</b>                 | programmed cell death 6                                                          | 0006810 // transport // inferred from electronic annotation//0006811 // ion transport // inferre   |
| 179.09953       | 189.35603       | 185.68564      | 168.6819       | NM_001170953//NM_0   |                                 | 0.009                | <b>1.04</b>     | <b>-1.10 Rnm1</b>                  | RNA (guanine-7-) methyltransferase                                               | 0016477 // cell migration // inferred from mutant phenotype//0016477 // cell migration // not r    |
| 668.83105       | 688.84827       | 644.50146      | 581.3264       | NM_031373//XM_0065   |                                 | 0.007                | -1.04           | <b>-1.11 Ogr1</b>                  | opioid growth factor receptor                                                    | 0005576 // extracellular region // inferred from electronic annotation                             |
| 834.1658        | 877.58167       | 778.20465      | 699.71356      | NM_001164156//NM_0   |                                 | 0.000                | -1.07           | <b>-1.11 Mrcr1</b>                 | microsphereule protein 1                                                         | 0016056 // rhodopsin mediated signaling pathway // inferred from mutant phenotype//0043087         |
| 66.30488        | 65.34878        | 67.65966       | 59.837852      | NM_001013012//XM_0   |                                 | 0.003                | <b>1.02</b>     | <b>-1.13 Zfp787</b>                | zinc finger protein 787                                                          | 0006468 // protein phosphorylation // inferred from direct assay//0007049 // cell cycle // inferr  |
| 95.829056       | 75.649574       | 81.587975      | 72.080086      | NM_027010            |                                 | 0.004                | -1.17           | <b>-1.13 Cyf1</b>                  | crystallin, gamma F                                                              | 0019012 // virion // inferred from electronic annotation//0019013 // viral nucleocapsid // infe    |
| 695.7521        | 730.0157        | 805.5714       | 710.42755      | NM_025693//NR_0377   |                                 | 0.001                | <b>1.16</b>     | <b>-1.13 Tmem41a</b>               | transmembrane protein 41a                                                        | 0006886 // intracellular protein transport // inferred from electronic annotation//0006887 // ex   |
| 525.6154        | 540.19104       | 546.61         | 481.18762      | NM_013924            |                                 | 0.008                | <b>1.04</b>     | <b>-1.14 Abt1</b>                  | activator of basal transcription 1                                               | 0007049 // cell cycle // inferred from electronic annotation//0008283 // cell proliferation // not |
| 101.02462       | 109.25879       | 134.81807      | 118.66679      | NM_001081065//XM_0   |                                 | 0.009                | <b>1.33</b>     | <b>-1.14 Zfp707</b>                | zinc finger protein 707                                                          | 0000041 // retina development in camera-type eye // inferred from mutant phenotype                 |
| 745.66125       | 801.71515       | 847.80945      | 746.1898       | NM_001081394//NM_0   |                                 | 0.001                | <b>1.14</b>     | <b>-1.14 Tmem248</b>               | transmembrane protein 248                                                        | 0001654 // eye development // inferred from mutant phenotype                                       |
| 1149.6855       | 1361.4747       | 1288.8113      | 1131.5114      | NM_025334            |                                 | 0.003                | <b>1.12</b>     | <b>-1.14 Txnd1c</b>                | thioredoxin domain containing 12 (endoplasmic reticulum)                         | 0006611 // protein export from nucleus // inferred from direct assay//0007275 // multicellula c    |
| 286.9514        | 322.07632       | 359.61365      | 311.13663      | NM_183170            |                                 | 0.008                | <b>1.25</b>     | <b>-1.16 Mpv17</b>                 | MPV17 mitochondrial membrane protein-like 2                                      | 0007165 // signal transduction // inferred from electronic annotation//0007186 // G-protein cou    |
| 12.404591       | 14.511468       | 13.22011       | 11.371908      | NM_001039238//NM_0   |                                 | 0.000                | <b>1.07</b>     | <b>-1.16 Dcnp1//Dcnp2//Dcnp3</b>   | demilune cell and parotid protein 1//demilune cell and parotid protein 2//de     | 0007275 // multicellular organismal development // inferred from electronic annotation//00160      |
| 681.8119        | 709.64374       | 832.71295      | 715.50055      | NM_009057//XM_0065   |                                 | 0.004                | <b>1.22</b>     | <b>-1.16 Scl50a1</b>               | solute carrier family 50 (sugar transporter), member 1                           |                                                                                                    |
| 248.0506        | 270.24194       | 279.8455       | 240.37427      | NM_029734            |                                 | 0.006                | <b>1.13</b>     | <b>-1.16 Wdhyh1</b>                | WDYHV motif containing 1                                                         | 0001582 // detection of chemical stimulus involved in sensory perception of sweet taste // not re  |
| 115.11313       | 124.87495       | 147.29564      | 125.92162      | NM_026117//NM_2076   |                                 | 0.002                | <b>1.28</b>     | <b>-1.17 Dded2</b>                 | death effector domain-containing DNA binding protein 2                           | 0006468 // protein phosphorylation // not recorded//0006950 // response to stress // not recor     |
| 308.2642        | 380.97968       | 343.81018      | 292.78058      | NM_080553//XM_0065   |                                 | 0.009                | <b>1.12</b>     | <b>-1.17 Itpr3</b>                 | inositol 1,4,5-triphosphate receptor 3                                           | 0001649 // osteoblast differentiation // not recorded//0006397 // mRNA processing // inferred f    |
| 33.810482       | 47.470654       | 38.702503      | 32.906536      | NM_029360            |                                 | 0.003                | <b>1.14</b>     | <b>-1.18 Tm4sf3</b>                | transmembrane 4 superfamily member 5                                             |                                                                                                    |
| 151.4919        | 120.18614       | 245.40456      | 208.30515      | NM_001083903//NM_1   |                                 | 0.006                | <b>1.62</b>     | <b>-1.18 Sbsn</b>                  | suprabasin                                                                       | 0007275 // multicellular organismal development // inferred from electronic annotation             |
| 20.539202       | 20.808317       | 21.180328      | 17.902147      | NM_001042418//NM_0   |                                 | 0.010                | <b>1.03</b>     | <b>-1.18 Cabry</b>                 | calcium-binding tyrosine-(Y)-phosphorylation regulated (fibrousheathin 2)        | 0007275 // multicellular organismal development // inferred from electronic annotation             |
| 1980.7354       | 1968.3641       | 1996.457       | 1682.3652      | NM_001199274//NM_1   |                                 | 0.004                | <b>1.01</b>     | <b>-1.19 Mat2b</b>                 | methionine adenosyltransferase II, beta                                          | 0006351 // transcription, DNA-templated // inferred from electronic annotation//0006355 // reg     |
| 983.54016       | 1002.24927      | 1031.7991      | 861.6388       | NM_145606            |                                 | 0.003                | <b>1.05</b>     | <b>-1.20 Chmp1a</b>                | charged multivesicular body protein 1A                                           | 0031069 // hair follicle morphogenesis // inferred from mutant phenotype                           |
| 1007.682        | 1060.9253       | 854.2852       | 711.68445      | NM_025915            |                                 | 0.009                | -1.18           | <b>-1.20 Tmem58</b>                | transmembrane protein 58                                                         | 0006457 // protein folding // inferred from direct assay//0006662 // glycerol ether metabolic pr   |
| 112.45588       | 106.81234       | 128.25092      | 106.510216     | NM_172875//XM_0065   |                                 | 0.007                | <b>1.14</b>     | <b>-1.20 Aizin2</b>                | antizyme inhibitor 2                                                             | 0007565 // female pregnancy // inferred from electronic annotation                                 |
| 1369.2303       | 1433.6484       | 1616.869       | 1333.6819      | NM_001199009//NM_1   |                                 | 0.009                | <b>1.18</b>     | <b>-1.21 Dcpl11</b>                | DBP1 and CUL4 associated factor 11                                               | 0032259 // methylation // inferred from electronic annotation                                      |
| 270.13675       | 307.58252       | 340.55954      | 280.72928      | NM_001004190         |                                 | 0.004                | <b>1.26</b>     | <b>-1.21 Zfp560</b>                | zinc finger protein 560                                                          | 0000226 // microtubule cytoskeleton organization // inferred from direct assay//0006184 // GTP     |
| 924.38574       | 939.7349        | 906.2641       | 737.0504       | NM_001199004//NM_0   |                                 | 0.007                | -1.02           | <b>-1.23 Gola5</b>                 | golgi autoantigen, golgin subfamily a, 5                                         | 0006351 // transcription, DNA-templated // inferred from electronic annotation//0006355 // reg     |
| 350.96143       | 360.64636       | 407.9188       | 327.77188      | NM_013770            |                                 | 0.005                | <b>1.16</b>     | <b>-1.24 Sc15a10</b>               | solute carrier family 25 (mitochondrial carrier, dicarboxylate transporter), mem | 0000070 // mitotic sister chromatid segregation // inferred from mutant phenotype//0007049 //      |
| 239.12836       | 276.19635       | 247.31636      | 196.78394      | NM_133733//XM_0065   |                                 | 0.005                | <b>1.03</b>     | <b>-1.26 Clmp</b>                  | CXADR-like membrane protein                                                      | 0005537 // mannose binding // inferred from direct assay//0030246 // carbohydrate binding // i     |
| 924.40405       | 916.7021        | 981.994        | 779.34906      | NM_029354//XM_0065   |                                 | 0.007                | <b>1.06</b>     | <b>-1.26 Mzt2</b>                  | mitotic spindle organizing protein 2                                             |                                                                                                    |
| 109.7685        | 105.43333       | 129.01692      | 102.36427      | NM_001164567//NM_0   |                                 | 0.005                | <b>1.18</b>     | <b>-1.26 Vill</b>                  | villin-like                                                                      | 0035418 // protein localization to synapse // inferred from mutant phenotype                       |
| 34.793518       | 34.548595       | 33.996597      | 26.567661      | NM_001285482//NM_0   |                                 | 0.008                | -1.02           | <b>-1.28 Htr1d</b>                 | 5-hydroxytryptamine (serotonin) receptor 1D                                      | 0006351 // transcription, DNA-templated // inferred from electronic annotation//0006355 // reg     |
| 4619.4604       | 4740.4546       | 9125.774       | 7125.0015      | NM_007801            |                                 | 0.008                | <b>1.98</b>     | <b>-1.28 Ctsb</b>                  | cathepsin H                                                                      | 0008544 // epidermis development // inferred from electronic annotation                            |
| 4124.035        | 4033.8813       | 4911.382       | 3813.3694      | NM_007657            |                                 | 0.009                | <b>1.19</b>     | <b>-1.29 Cd9</b>                   | CD9 antigen                                                                      | 0006508 // proteolysis // inferred from electronic annotation//0006749 // glutathione metabolic    |
| 58.654034       | 66.26042        | 57.22359       | 44.23415       | NR_040406//NR_04040  |                                 | 0.007                | -1.02           | <b>-1.29 Gm16845</b>               | predicted gene, 16845                                                            | 0008152 // metabolic process // not recorded//0051586 // positive regulation of dopamine upa       |
| 94.84323        | 114.48559       | 238.80887      | 184.10858      | NM_009897//XM_0064   |                                 | 0.003                | <b>2.52</b>     | <b>-1.30 Kmt1</b>                  | creatine kinase, mitochondrial 1, ubiquitous                                     | 0006898 // receptor-mediated endocytosis // not recorded//0006935 // chemotaxis // inferred f      |
| 160.46207       | 220.5536        | 441.01245      | 337.7131       | NM_001083894//NM_0   |                                 | 0.005                | <b>2.75</b>     | <b>-1.31 Liph</b>                  | lipase, member H                                                                 | 0008277 // regulation of G-protein coupled receptor protein signaling pathway // inferred from g   |
| 121.60832       | 182.8558        | 214.94002      | 164.22755      | NM_028009//XM_0065   |                                 | 0.006                | <b>1.01</b>     | <b>-1.31 Rpsud1</b>                | RNA pseudouridylation synthase domain containing 1                               |                                                                                                    |
| 103.562805      | 122.44802       | 153.63472      | 115.27902      | NM_001082975//XM_0   |                                 | 0.007                | <b>1.48</b>     | <b>-1.33 Sdr39u1</b>               | short chain dehydrogenase/reductase family 39U, member 1                         | 0007155 // cell adhesion // inferred from mutant phenotype//0007338 // single fertilization // in  |
| 609.43494       | 616.3825        | 585.8399       | 433.93536      | NM_001270495//NM_0   |                                 | 0.003                | -1.04           | <b>-1.35 Tmem254a//Tmem254b</b>    | transmembrane protein 254a//transmembrane protein 254b//transmembran             | 0006590 // thyroid hormone generation // not recorded//0009409 // response to cold // not rec      |
| 500.6313        | 546.75055       | 652.7005       | 476.94382      | NM_011611//NM_1707   |                                 | 0.006                | <b>1.30</b>     | <b>-1.37 Cd40</b>                  | CD40 antigen                                                                     | 0007155 // cell adhesion // inferred from electronic annotation//0008285 // negative regulati      |
| 247.25008       | 274.07913       | 330.198        | 239.52315      | NM_001243584//NM_0   |                                 | 0.005                | <b>1.34</b>     | <b>-1.38 Mif4gd</b>                | MIF4G domain containing                                                          | 0006810 // transport // inferred from electronic annotation//0015031 // protein transport // inh   |
| 184.00974       | 175.80466       | 252.7704       | 182.76837      | NM_001286038//NM_0   |                                 | 0.009                | <b>1.37</b>     | <b>-1.38 Klc3</b>                  | kinesin light chain 3                                                            | 0006810 // transport // inferred from electronic annotation//0006811 // ion transport // inferre   |
| 1144.5792       | 1152.8401       | 1104.2269      | 796.5783       | NM_001270495//NM_0   |                                 | 0.004                | -1.04           | <b>-1.39 Tmem254a//Tmem254b</b>    | transmembrane protein 254a//transmembrane protein 254b//transmembran             | 0001764 // neuron migration // inferred from electronic annotation//0006184 // GTP catalyti        |
| 3097.0762       | 2950.8845       | 3751.1406      | 2688.6208      | NM_010261            |                                 | 0.005                | <b>1.21</b>     | <b>-1.40 Rabac1</b>                | Rab acceptor 1 (prenylated)                                                      | 0005737 // cytoplasm // inferred from electronic annotation//0005856 // cytoskeleton // inferre    |
| 59.049698       | 52.857567       | 55.86813       | 39.78884       | NM_027622            |                                 | 0.006                | -1.06           | <b>-1.40 Txs19.2</b>               | testis expressed gene 19.2                                                       | 0009922 // spindle pole // not recorded//0005737 // cytoplasm // not recorded//0005814 // ce       |
| 1979.6515       | 1891.6511       | 2086.9712      | 1478.3418      | NM_009101//XM_0065   |                                 | 0.002                | <b>1.05</b>     | <b>-1.41 Rras</b>                  | Harvey rat sarcoma oncogene, subgroup R                                          | 0010468 // regulation of gene expression // not recorded//0030154 // cell differentiation // infe  |
| 90.2437         | 104.66821       | 185.40825      | 127.885994     | NM_175638//XM_0065   |                                 | 0.007                | <b>2.05</b>     | <b>-1.45 Wnk4</b>                  | WNK lysine deficient protein kinase 4                                            |                                                                                                    |
| 81.064354       | 73.11081        | 82.32966       | 54.972485      | NM_001007582         |                                 | 0.000                | <b>1.00</b>     | <b>-1.50 AYT61184</b>              | cDNA sequence AY761184                                                           |                                                                                                    |
| 4887.4385       | 4920.806        | 9818.816       | 6502.976       | NM_011313            |                                 | 0.010                | <b>2.01</b>     | <b>-1.51 S100a6</b>                | S100 calcium binding protein A6 (calcylin)                                       | 0001525 // angiogenesis // inferred from electronic annotation//0007155 // cell adhesion // infe   |
| 923.67535       | 903.7491        | 1084.5637      | 705.1583       | NM_010579            |                                 | 0                    |                 |                                    |                                                                                  |                                                                                                    |



| [ICR, Air, PBS][ICR, Air, SFN [ICR, O2, PBS][ICR, O2, SFN][RefSeq Transcript ID |           |           |                       | p (Prenatal Treatment-Exposure) | FC [Air-PBS: O2-PBS FC [O2 PBS:SFN]Gene Symbol | Gene Title  | Gene Ontology                                        |
|---------------------------------------------------------------------------------|-----------|-----------|-----------------------|---------------------------------|------------------------------------------------|-------------|------------------------------------------------------|
| 1985.1251                                                                       | 2506.2043 | 2176.9446 | 934.4288 NM_001267808 | 0.004                           | 1.10                                           | -2.33 H2-D1 | // cell cycle // inferred from electronic annotation |
| 1195.5133                                                                       | 1377.2422 | 5246.056  | 1710.0326 NM_008491   | 0.001                           | 4.39                                           | -3.07 Lcn2  | // mitotic nuclear division                          |



[illegible]

| [Nrf2-KO, Air, PBS][r [Nrf2-KO, Air, SFN]] [Nrf2-KO, O2, PBS]] [Nrf2-KO, O2, SFN]] [RefSeq Transcript ID p (Prenatal Treatment-Exposure) |           |           |                        | FC [Air-PBS:O2-PBS] | FC [O2 PBS:SFN] | Gene Symbol  | Gene Title                              | Gene Ontology                                                                                                                     |
|------------------------------------------------------------------------------------------------------------------------------------------|-----------|-----------|------------------------|---------------------|-----------------|--------------|-----------------------------------------|-----------------------------------------------------------------------------------------------------------------------------------|
| 102.074425                                                                                                                               | 143.36925 | 415.62582 | 165.67465 NM_001081205 | 0.009               | 4.07            | -2.51 Nipa1l | NIPA-like domain containing 1           | 0006810 // transport // inferred from electronic annotation//0006811 // ion transport // inferred from electronic annotation//00: |
| 558.2761                                                                                                                                 | 815.70386 | 2517.2708 | 907.5686 NM_020008     | 0.001               | 4.51            | -2.77 Clec7a | C-type lectin domain family 7, member a | 0001878 // response to yeast // inferred from direct assay//0001879 // detection of yeast // inferred from direct assay//0002221  |



**Table S5. Prenatal sulforaphane-modulated genes in *Nrf2*<sup>+/+</sup> placenta (T Test unpaired p-value P <= 0.05 ).**

**>=1.5-fold 708 genes**

RIKEN cDNA and predicted genes excluded. Fold Change (FC): Blue (-) - fold lower in SFN than PBS, Red - fold higher in SFN than PBS.

| [ICR, PBS] | [ICR, SUL] | p     | RefSeq Transcript ID | FC [PBS:SFN] | Gene Symbol               | Gene Title                                                                                            | Gene Ontology Biological Process                                                                   |
|------------|------------|-------|----------------------|--------------|---------------------------|-------------------------------------------------------------------------------------------------------|----------------------------------------------------------------------------------------------------|
| 35.40988   | 266.3408   | 0.005 | NM_025288            | 7.33         | <i>Stfa3</i>              | stefin A3                                                                                             | 0004869 // cysteine-type endopeptidase inhibitor activity // inferred from electronic annotation   |
| 112.3694   | 554.5562   | 0.009 | NM_001082543///NM    | 4.56         | <i>BC100530//Stfa1</i>    | cDNA sequence BC100530//stefin A1                                                                     | 0004869 // cysteine-type endopeptidase inhibitor activity // inferred from electronic annotation   |
| 94.05842   | 412.6405   | 0.011 | NM_026516            | 4.33         | <i>Tmem178</i>            | transmembrane protein 178                                                                             | 0005198 // structural molecule activity // inferred from electronic annotation                     |
| 24.77076   | 87.45144   | 0.042 | NM_011670            | 3.69         | <i>Uchl1</i>              | ubiquitin carboxy-terminal hydrolase L1                                                               | 0007409 // axonogenesis // inferred from mutant phenotype//0019896 // axon transport of mi         |
| 77.77694   | 255.1708   | 0.011 | NM_144848            | 3.26         | <i>Eppk1</i>              | epiplakin 1                                                                                           | 0005737 // cytoplasm // inferred from direct assay//0005856 // cytoskeleton // inferred from e     |
| 43.68089   | 148.7498   | 0.040 | NM_010441            | 3.10         | <i>Hmg2</i>               | high mobility group AT-hook 2                                                                         | 0051301 // cell division // inferred from electronic annotation//0007049 // cell cycle // inferrec |
| 11.32679   | 35.95194   | 0.012 | NM_027137            | 3.04         | <i>Lce1d</i>              | late cornified envelope 1D                                                                            |                                                                                                    |
| 41.48204   | 109.7844   | 0.035 | NM_199473            | 2.92         | <i>Col8a2</i>             | collagen, type VIII, alpha 2                                                                          | 0048593 // camera-type eye morphogenesis // inferred from genetic interaction//0007155 // c        |
| 211.6307   | 621.1341   | 0.018 | NM_009209            | 2.88         | <i>Slc6a2</i>             | solute carrier family 6 (neurotransmitter transporter, noradrenalin), mem                             | 0015844 // monoamine transport // not recorded//0015874 // norepinephrine transport // infi        |
| 92.00953   | 256.2665   | 0.018 | NM_011485            | 2.87         | <i>Star</i>               | steroidogenic acute regulatory protein                                                                | 0044255 // cellular lipid metabolic process // inferred from mutant phenotype//0010288 // res      |
| 426.3177   | 1176.62    | 0.028 | NM_007406///NM_0     | 2.86         | <i>Adcy7</i>              | adenylate cyclase 7                                                                                   | 0009190 // cyclic nucleotide biosynthetic process // inferred from electronic annotation//00006    |
| 95.5387    | 257.2281   | 0.009 | NM_001081139         | 2.80         | <i>Ankrd35</i>            | ankyrin repeat domain 35                                                                              |                                                                                                    |
| 349.9298   | 911.0887   | 0.028 | NM_001081362         | 2.79         | <i>Trapp</i>              | transformation/transcription domain-associated protein                                                | 0016568 // chromatin modification // inferred from electronic annotation//0006355 // regulati      |
| 44.18663   | 110.3886   | 0.046 | NM_008508            | 2.77         | <i>Lor</i>                | loricrin//Loricrin, mRNA (cDNA clone IMAGE:4190845)                                                   | 0030216 // keratinocyte differentiation // inferred from electronic annotation//0031424 // ker:    |
| 357.6803   | 1011.711   | 0.014 | NM_033314            | 2.76         | <i>Slco2a1</i>            | solute carrier organic anion transporter family, member 2a1//Solute carri                             | 0015732 // prostaglandin transport // inferred from direct assay//0006810 // transport // infer    |
| 209.9585   | 566.8061   | 0.012 | NM_177386            | 2.75         | <i>Sfmbt2</i>             | Scm-like with four mbt domains 2                                                                      | 0045449 // regulation of transcription // inferred from electronic annotation                      |
| 211.0596   | 604.8945   | 0.018 | XM_001476334///XM    | 2.75         | <i>100042151//1000432</i> | predicted gene, 100039204//hypothetical protein LOC100047648//CWC:                                    | 0008380 // RNA splicing // inferred from electronic annotation//0006397 // mRNA processing /       |
| 24.54087   | 68.3346    | 0.024 | NM_025984            | 2.71         | <i>Lce1a1</i>             | late cornified envelope 1A1                                                                           |                                                                                                    |
| 489.1765   | 1312.866   | 0.019 | NM_007984            | 2.66         | <i>Fscn1</i>              | fascin homolog 1, actin bundling protein (Strongylocentrotus purpuratus)                              | 0003779 // actin binding // inferred from electronic annotation//0003779 // actin binding // int   |
| 196.8718   | 467.3081   | 0.044 | NM_001081098         | 2.59         | <i>Zfp362</i>             | zinc finger protein 362                                                                               | 0008270 // zinc ion binding // inferred from electronic annotation//0003676 // nucleic acid bin    |
| 930.6491   | 2130.405   | 0.045 | NM_001146268///NM    | 2.57         | <i>Pdgfrb</i>             | platelet derived growth factor receptor, beta polypeptide                                             | 0008284 // positive regulation of cell proliferation // inferred from electronic annotation//00006 |
| 118.9973   | 282.2134   | 0.022 | NM_001109661///NM    | 2.52         | <i>Bach2</i>              | BTB and CNC homology 2                                                                                | 0006355 // regulation of transcription, DNA-dependent // inferred from direct assay//0006355       |
| 161.0767   | 377.9266   | 0.030 | NM_007872///NM_1     | 2.51         | <i>Dnmt3a</i>             | DNA methyltransferase 3A                                                                              | 0007283 // spermatogenesis // inferred from mutant phenotype//0006346 // methylation-dep           |
| 74.91989   | 179.8726   | 0.008 | NM_010101            | 2.51         | <i>S1pr3</i>              | sphingosine-1-phosphate receptor 3                                                                    | 0007165 // signal transduction // inferred from electronic annotation//0032651 // regulation o     |
| 61.43885   | 149.0868   | 0.023 | NM_001081417         | 2.51         | <i>Chd7</i>               | chromodomain helicase DNA binding protein 7                                                           | 0030540 // female genitalia development // inferred from mutant phenotype//0042472 // inne         |
| 188.5176   | 481.9748   | 0.016 | XM_001476334///XM    | 2.50         | <i>100042151//1000432</i> | predicted gene, 100039204//hypothetical protein LOC100047648//CWC:                                    | 0008380 // RNA splicing // inferred from electronic annotation//0006397 // mRNA processing /       |
| 282.5281   | 640.1924   | 0.038 | NM_001081109         | 2.48         | <i>Lmtk2</i>              | lemur tyrosine kinase 2                                                                               | 0007399 // nervous system development // not recorded//0048011 // nerve growth factor rec          |
| 23.55192   | 57.13178   | 0.002 | NM_009144            | 2.44         | <i>Sfrp2</i>              | secreted frizzled-related protein 2                                                                   | 0007275 // multicellular organismal development // inferred from electronic annotation//0030       |
| 174.2613   | 389.5284   | 0.037 | NM_010800            | 2.42         | <i>Bhlha15</i>            | basic helix-loop-helix family, member a15                                                             | 0048469 // cell maturation // inferred from mutant phenotype//0006851 // mitochondrial calc        |
| 313.2889   | 726.1153   | 0.016 | NM_027373            | 2.40         | <i>Afap1</i>              | actin filament associated protein 1                                                                   | 0009966 // regulation of signal transduction // not recorded                                       |
| 199.5643   | 458.1648   | 0.011 | NM_001081279         | 2.37         | <i>Mfh3a1</i>             | malignant fibrous histiocytoma amplified sequence 1                                                   | 0005515 // protein binding // inferred from electronic annotation                                  |
| 44.1906    | 106.9033   | 0.044 | NM_008725            | 2.35         | <i>Nppa</i>               | natriuretic peptide precursor type A                                                                  | 0050880 // regulation of blood vessel size // inferred from electronic annotation//0008217 // r    |
| 422.2918   | 971.3632   | 0.010 | NM_175451            | 2.31         | <i>Kkap4</i>              | cytoskeleton-associated protein 4                                                                     | 0005515 // protein binding // not recorded                                                         |
| 50.9815    | 123.5872   | 0.046 | NM_021285///NM_0     | 2.28         | <i>Myl1</i>               | myosin, light polypeptide 1                                                                           | 0003774 // motor activity // inferred from electronic annotation//0005509 // calcium ion bindi     |
| 417.8607   | 906.8631   | 0.040 | NM_175260            | 2.25         | <i>Myh10</i>              | myosin, heavy polypeptide 10, non-muscle//Myosin, heavy polypeptide 1                                 | 0021678 // third ventricle development // inferred from mutant phenotype//0007097 // nucle:        |
| 480.0858   | 1007.058   | 0.031 | NM_001083935///NM    | 2.25         | <i>Pth1r</i>              | parathyroid hormone 1 receptor                                                                        | 0002076 // osteoblast development // inferred from mutant phenotype//0048469 // cell matu          |
| 72.74856   | 153.3457   | 0.048 | NM_978355///XM_9C    | 2.23         | <i>Klhl29</i>             | kelch-like 29 (Drosophila)                                                                            | 0005515 // protein binding // inferred from electronic annotation                                  |
| 118.6122   | 260.5463   | 0.004 | NM_011941            | 2.23         | <i>Mapkbp1</i>            | mitogen-activated protein kinase binding protein 1                                                    | 0007256 // activation of JNKK activity // inferred from direct assay                               |
| 161.7701   | 366.8025   | 0.012 | NM_133833///NM_1     | 2.22         | <i>Dst</i>                | dystonin                                                                                              | 0031122 // cytoplasmic microtubule organization // inferred from mutant phenotype//000809          |
| 146.2006   | 316.1447   | 0.002 | NM_001160268///NM    | 2.21         | <i>Plekha6</i>            | pleckstrin homology domain containing, family A member 6                                              |                                                                                                    |
| 133.2459   | 271.5109   | 0.046 | NM_011214///NM_0     | 2.19         | <i>Ptpnru</i>             | protein tyrosine phosphatase, receptor type, U                                                        | 0034109 // homotypic cell-cell adhesion // inferred from direct assay//0016311 // dephosphor       |
| 205.0009   | 421.9397   | 0.028 | NM_001025379         | 2.19         | <i>Sema3g</i>             | sema domain, immunoglobulin domain (Ig), short basic domain, secreted,                                | 0007275 // multicellular organismal development // inferred from electronic annotation             |
| 53.65535   | 115.8217   | 0.004 | NM_011976            | 2.19         | <i>Sema4g</i>             | sema domain, immunoglobulin domain (Ig), transmembrane domain (TM)                                    | 0007275 // multicellular organismal development // inferred from electronic annotation//0030       |
| 1618.126   | 3295.512   | 0.039 | NM_009932            | 2.17         | <i>Col4a2</i>             | collagen, type IV, alpha 2                                                                            | 0016525 // negative regulation of angiogenesis // inferred from sequence or structural similarity  |
| 253.4368   | 521.8038   | 0.036 | NM_015734            | 2.15         | <i>Col5a1</i>             | collagen, type V, alpha 1                                                                             | 0007155 // cell adhesion // inferred from electronic annotation//0051128 // regulation of cellu    |
| 423.3071   | 888.5441   | 0.037 | NM_016710            | 2.15         | <i>Nsfp1</i>              | nucleosome binding protein 1                                                                          | 0006355 // regulation of transcription, DNA-dependent // inferred from electronic annotation//     |
| 1094.84    | 2244.811   | 0.034 | XM_621314///NM_0:    | 2.14         | <i>Dsp</i>                | desmoplakin                                                                                           | 0016323 // basolateral plasma membrane // inferred from direct assay//0030057 // desmosom          |
| 51.63446   | 106.1434   | 0.020 | NM_177047            | 2.14         | <i>Auts2</i>              | Autism susceptibility candidate 2, mRNA (cDNA clone IMAGE:5347232)//autism susceptibility candidate 2 | 0007264 // small GTPase mediated signal transduction // inferred from electronic annotation//      |
| 380.7839   | 772.0258   | 0.023 | NM_001039677         | 2.12         | <i>Slc30a2</i>            | solute carrier family 30 (zinc transporter), member 2                                                 | 0006812 // cation transport // inferred from electronic annotation                                 |
| 963.4966   | 1955.262   | 0.029 | NM_001113488///NM    | 2.11         | <i>9-Sep</i>              | septin 9                                                                                              | 0051301 // cell division // inferred from electronic annotation//0007049 // cell cycle // inferrec |
| 59.62911   | 120.9713   | 0.014 | NM_178660            | 2.11         | <i>Rbms3</i>              | RNA binding motif, single stranded interacting protein                                                | 0003723 // RNA binding // inferred from electronic annotation//0000166 // nucleotide binding       |
| 177.435    | 377.6742   | 0.018 | NM_173036            | 2.11         | <i>Gpr97</i>              | G protein-coupled receptor 97                                                                         | 0007165 // signal transduction // inferred from electronic annotation//0007218 // neuropeptid      |
| 161.2454   | 318.297    | 0.044 | NM_172493///NM_0     | 2.11         | <i>Diap2</i>              | diaphanous homolog 2 (Drosophila)                                                                     | 0030036 // actin cytoskeleton organization // inferred from electronic annotation//0007275 //      |
| 545.8066   | 1091.028   | 0.034 | NM_009059            | 2.11         | <i>Rgl2</i>               | ral guanine nucleotide dissociation stimulator-like 2                                                 | 0007264 // small GTPase mediated signal transduction // inferred from electronic annotation//      |
| 100.7942   | 195.8783   | 0.048 | NM_021366            | 2.10         | <i>Klf13</i>              | Kruppel-like factor 13 (Klf13), mRNA//Kruppel-like factor 13                                          | 0006366 // transcription from RNA polymerase II promoter // inferred from sequence or structu      |
| 18.04456   | 37.9812    | 0.010 | XM_001474909///XM    | 2.10         | <i>Tnik</i>               | TRAF2 and NCK interacting kinase, mRNA (cDNA clone MGC:183916 IMAGE:0006950)                          | 0006950 // response to stress // inferred from sequence or structural similarity//0007243 // pr    |
| 191.2534   | 402.5042   | 0.018 | NM_153396///XM_9:    | 2.09         | <i>Mical3</i>             | microtubule associated monooxygenase, calponin and LIM domain containin                               | 0008152 // metabolic process // inferred from electronic annotation                                |

| [ICR, PBS]([ICR, SUL])p | RefSeq Transcript ID    | FC [PBS:SFN] | Gene Symbol                 | Gene Title                                                                                                                  | Gene Ontology Biological Process                                                                   |
|-------------------------|-------------------------|--------------|-----------------------------|-----------------------------------------------------------------------------------------------------------------------------|----------------------------------------------------------------------------------------------------|
| 118.5959 240.8447       | 0.008 NM_001040398      | 2.07         | <b>Setd1b</b>               | SET domain containing 1B                                                                                                    | 0016568 // chromatin modification // inferred from electronic annotation///0006355 // regulati     |
| 291.136 591.001         | 0.007 NM_175155         | 2.07         | <b>Sash1</b>                | SAM and SH3 domain containing 1                                                                                             | 0007049 // cell cycle // inferred from electronic annotation///0045786 // negative regulation of   |
| 626.7794 1221.173       | 0.042 NM_001040459      | 2.06         | <b>Shroom4</b>              | shroom family member 4                                                                                                      | 0007275 // multicellular organismal development // inferred from electronic annotation///0007      |
| 176.0527 349.1648       | 0.017 NM_172457         | 2.06         | <b>Mobkl2a</b>              | MOB1, Mps One Binder kinase activator-like 2A (yeast)                                                                       | 0005515 // protein binding // inferred from electronic annotation///0046872 // metal ion bindir    |
| 9.943523 20.63494       | 0.009 NR_001586///NM_0C | 2.06         | <b>Speer1-ps1///EG54572</b> | spermatogenesis associated glutamate (E)-rich protein 1, pseudogene 1///predicted gene, EG545728///predicted gene, EG623898 |                                                                                                    |
| 132.4335 282.453        | 0.041 NM_029667         | 2.06         | <b>Lce1i</b>                | late cornified envelope 1l                                                                                                  |                                                                                                    |
| 521.2607 1072.452       | 0.012 NM_001033380      | 2.05         | <b>Itpril2</b>              | inositol 1,4,5-triphosphate receptor interacting protein-like 2                                                             | 0016021 // integral to membrane // inferred from electronic annotation///0016020 // membrar        |
| 174.54 345.2822         | 0.028 NM_015830         | 2.05         | <b>Solh</b>                 | Mus musculus, clone IMAGE:4241884///small optic lobes homolog (Drosophila)                                                  | 0006508 // proteolysis // inferred from electronic annotation                                      |
| 169.1234 323.1221       | 0.044 NM_001113573///NM | 2.05         | <b>Brd3</b>                 | bromodomain containing 3                                                                                                    | 0005634 // nucleus // inferred from electronic annotation                                          |
| 447.3822 873.7873       | 0.042 NM_172397         | 2.03         | <b>Limd2</b>                | LIM domain containing 2                                                                                                     | 0046872 // metal ion binding // inferred from electronic annotation///0008270 // zinc ion bindir   |
| 972.4028 1925.166       | 0.009 NM_025294         | 2.02         | <b>Gtlf3b</b>               | gene trap locus F3b                                                                                                         |                                                                                                    |
| 169.0003 332.5705       | 0.017 NM_010683         | 2.02         | <b>Lamc1</b>                | laminin, gamma 1                                                                                                            | 0022617 // extracellular matrix disassembly // inferred from electronic annotation///0016477 //    |
| 337.8081 641.7703       | 0.037 NM_020508///XM_0I | 2.02         | <b>Brd4</b>                 | bromodomain containing 4                                                                                                    | 0043388 // positive regulation of DNA binding // inferred from direct assay///0006468 // protei    |
| 230.9898 458.0944       | 0.034 NM_013807         | 2.02         | <b>Plk3</b>                 | polo-like kinase 3 (Drosophila)                                                                                             | 0007049 // cell cycle // inferred from electronic annotation///0006468 // protein amino acid ph    |
| 46.18642 93.42761       | 0.026                   | 2.01         | <b>D15Wsu126e</b>           | DNA segment, Chr 15, Wayne State University 126, expressed                                                                  |                                                                                                    |
| 145.1635 285.2369       | 0.038 NM_201385///NM_2  | 2.00         | <b>LOC671535///Plec1</b>    | similar to Plec1 protein///plectin 1                                                                                        | 0003779 // actin binding // inferred from electronic annotation///0003950 // NAD+ ADP-ribosyl      |
| 376.4715 746.1816       | 0.033 NM_009362         | 2.00         | <b>Tff1</b>                 | trefoil factor 1                                                                                                            | 0030154 // cell differentiation // inferred from mutant phenotype///0009611 // response to wo      |
| 238.0372 449.8092       | 0.037 NM_172827         | 2.00         | <b>Lnpep</b>                | leucyl/cystinyl aminopeptidase                                                                                              | 0030147 // natriuresis // inferred from electronic annotation///0048169 // regulation of long-te   |
| 157.7969 301.0559       | 0.034 NM_001042623///NM | 1.99         | <b>Phc1</b>                 | polyhomeotic-like 1 (Drosophila)                                                                                            | 0007275 // multicellular organismal development // inferred from electronic annotation             |
| 232.68 443.4164         | 0.026 NM_001081118      | 1.99         | <b>Phrf1</b>                | PHD and ring finger domains 1                                                                                               | 0006366 // transcription from RNA polymerase II promoter // not recorded///0007242 // intrac       |
| 164.3662 321.0152       | 0.029 NM_177409///NM_1  | 1.99         | <b>Tram2</b>                | translocating chain-associating membrane protein 2                                                                          | 0050002 // intracellular protein transmembrane transport // inferred from electronic annotation    |
| 2025.212 3853.207       | 0.034 NM_010137///XM_0I | 1.98         | <b>LOC100048537///Epa6</b>  | endothelial PAS domain protein 1///similar to Endothelial PAS domain prot                                                   | 0043129 // surfactant homeostasis // inferred from mutant phenotype///0007275 // multicellul       |
| 133.997 252.9343        | 0.026 NM_001024955///NM | 1.97         | <b>Pik3r1</b>               | phosphatidylinositol 3-kinase, regulatory subunit, polypeptide 1 (p85 alpha)                                                | 0007165 // signal transduction // inferred from electronic annotation///0048009 // insulin-like g  |
| 66.61494 128.0928       | 0.027 NM_199068         | 1.97         | <b>Foxk1</b>                | forkhead box K1                                                                                                             | 0007275 // multicellular organismal development // inferred from electronic annotation///0045      |
| 722.7357 1335.036       | 0.049 NM_013605         | 1.97         | <b>Muc1</b>                 | mucin 1, transmembrane                                                                                                      | 0016324 // apical plasma membrane // inferred from direct assay///0005634 // nucleus // inferi     |
| 134.2631 251.8326       | 0.040 NM_172882         | 1.96         | <b>Wdfy3</b>                | WD repeat and FYVE domain containing 3                                                                                      | 0016757 // transferase activity, transferring glycosyl groups // inferred from electronic annotati |
| 188.671 360.7327        | 0.017 NM_016808///NM_1  | 1.96         | <b>Usp2</b>                 | ubiquitin specific peptidase 2                                                                                              | 0019941 // modification-dependent protein catabolic process // inferred from electronic annota     |
| 62.10377 118.003        | 0.020 NM_027011         | 1.96         | <b>Krt5</b>                 | keratin 5                                                                                                                   | 0005198 // structural molecule activity // inferred from electronic annotation///0005515 // prot   |
| 198.6434 373.9885       | 0.030 NM_019472         | 1.95         | <b>Myo10</b>                | myosin X                                                                                                                    | 0007165 // signal transduction // inferred from electronic annotation                              |
| 203.4426 396.5453       | 0.024 NM_001145836///NM | 1.95         | <b>Ralgds</b>               | ral guanine nucleotide dissociation stimulator                                                                              | 0007264 // small GTPase mediated signal transduction // inferred from electronic annotation///     |
| 171.969 325.3518        | 0.016 NM_173760         | 1.95         | <b>Hisppd1</b>              | histidine acid phosphatase domain containing 1                                                                              | 0006020 // inositol metabolic process // inferred from sequence or structural similarity           |
| 574.0403 1082.442       | 0.032 NM_011597         | 1.95         | <b>Tjp2</b>                 | tight junction protein 2                                                                                                    | 0005515 // protein binding // inferred from electronic annotation///0005515 // protein binding     |
| 668.043 1290.094        | 0.017 NM_007883         | 1.94         | <b>Dsg2</b>                 | desmoglein 2///Desmoglein 2 (Dsg2), mRNA                                                                                    | 0007156 // homophilic cell adhesion // inferred from electronic annotation///0007155 // cell ad    |
| 470.3322 870.0803       | 0.036 NM_011962         | 1.94         | <b>Plod3</b>                | procollagen-lysine, 2-oxoglutarate 5-dioxygenase 3                                                                          | 0019538 // protein metabolic process // inferred from electronic annotation///00055114 // oxida    |
| 37.30195 71.44573       | 0.012 NM_011256         | 1.94         | <b>Pitpnm2</b>              | phosphatidylinositol transfer protein, membrane-associated 2                                                                | 0006810 // transport // inferred from electronic annotation                                        |
| 89.97656 173.5232       | 0.023 NM_008641///NM_0  | 1.94         | <b>Mast2</b>                | microtubule associated serine/threonine kinase 2///Microtubule associate                                                    | 0048515 // spermatid differentiation // inferred from direct assay///0006468 // protein amino a    |
| 104.7456 195.4346       | 0.030 NM_198109         | 1.93         | <b>Ssh1</b>                 | slingshot homolog 1 (Drosophila)                                                                                            | 0016311 // dephosphorylation // inferred from electronic annotation///0006470 // protein amir      |
| 56.81121 110.8075       | 0.033 NM_178406         | 1.92         | <b>Gpr153</b>               | G protein-coupled receptor 153                                                                                              | 0007165 // signal transduction // inferred from electronic annotation///0007186 // G-protein cc    |
| 193.6991 361.0289       | 0.021 NM_173379         | 1.92         | <b>Leprel1</b>              | leprecan-like 1                                                                                                             | 0019538 // protein metabolic process // inferred from electronic annotation///00055114 // oxida    |
| 516.5957 971.8157       | 0.020 NM_139140         | 1.92         | <b>Spats2</b>               | spermatogenesis associated, serine-rich 2                                                                                   | 0005737 // cytoplasm // inferred from direct assay///0005737 // cytoplasm // inferred from ele     |
| 116.0436 219.221        | 0.024 NM_172424         | 1.92         | <b>Med13l</b>               | mediator complex subunit 13-like                                                                                            | 0006357 // regulation of transcription from RNA polymerase II promoter // inferred from electr     |
| 658.4739 1220.883       | 0.028 NM_175414         | 1.92         | <b>Tspan9</b>               | tetraspanin 9                                                                                                               | 0016021 // integral to membrane // inferred from electronic annotation///0016020 // membrar        |
| 75.09846 139.9092       | 0.025 NM_018775         | 1.91         | <b>Tbc1d8</b>               | TBC1 domain family, member 8                                                                                                | 0032313 // regulation of Rab GTPase activity // inferred from electronic annotation                |
| 504.3522 951.1658       | 0.006 NM_133626///NM_0  | 1.91         | <b>Rrbp1</b>                | ribosome binding protein 1                                                                                                  | 0065002 // intracellular protein transmembrane transport // inferred from electronic annotati      |
| 275.4002 519.4771       | 0.037 NM_144925         | 1.91         | <b>Tnrc6a</b>               | trinucleotide repeat containing 6a                                                                                          | 0009267 // cellular response to starvation // inferred from direct assay///0032507 // mainten      |
| 166.5425 311.159        | 0.010 NM_009686         | 1.90         | <b>Apbb2</b>                | amyloid beta (A4) precursor protein-binding, family B, member 2                                                             | 0030308 // negative regulation of cell growth // inferred from direct assay///0030048 // actin fil |
| 221.0302 412.165        | 0.008 NM_007842         | 1.90         | <b>Dhx9</b>                 | DEAH (Asp-Glu-Ala-His) box polypeptide 9                                                                                    | 0034605 // cellular response to heat // inferred from direct assay                                 |
| 113.2601 209.0205       | 0.021 NM_010221         | 1.90         | <b>Fkbp10</b>               | FK506 binding protein 10                                                                                                    | 0006457 // protein folding // inferred from electronic annotation                                  |
| 198.865 373.955         | 0.036 NM_011866         | 1.90         | <b>Pde10a</b>               | phosphodiesterase 10A                                                                                                       | 0045672 // positive regulation of osteoclast differentiation // inferred from mutant phenotype/    |
| 220.3442 413.3039       | 0.014 NM_001081337      | 1.89         | <b>Sipa1l2</b>              | signal-induced proliferation-associated 1 like 2                                                                            | 0051056 // regulation of small GTPase mediated signal transduction // inferred from electronic     |
| 104.6065 196.355        | 0.036 NM_007403         | 1.89         | <b>Adam8</b>                | a disintegrin and metallopeptidase domain 8                                                                                 | 0007229 // integrin-mediated signaling pathway // inferred from electronic annotation///00065      |
| 90.01758 164.9848       | 0.033 NM_011104         | 1.89         | <b>Prkce</b>                | protein kinase C, epsilon                                                                                                   | 0007635 // chemosensory behavior // traceable author statement///0007242 // intracellular sig      |
| 18.21033 34.43372       | 0.014 NM_181540         | 1.89         | <b>Tm6sf2</b>               | transmembrane 6 superfamily member 2                                                                                        | 0016021 // integral to membrane // inferred from electronic annotation///0016020 // membrar        |
| 239.9004 446.5806       | 0.037 NM_178661         | 1.88         | <b>Creb3l2</b>              | cAMP responsive element binding protein 3-like 2                                                                            | 0006986 // response to unfolded protein // inferred from electronic annotation///0006355 // re     |
| 2881.238 5221.864       | 0.020 NM_009931         | 1.88         | <b>Col4a1</b>               | collagen, type IV, alpha 1                                                                                                  | 0005201 // extracellular matrix structural constituent // inferred from electronic annotation///0  |
| 152.6381 274.8745       | 0.032 NM_001122676///NM | 1.88         | <b>Zcchc2</b>               | zinc finger, CCHC domain containing 2///Zinc finger, CCHC domain containi                                                   | 0007154 // cell communication // inferred from electronic annotation                               |
| 1230.772 2225.907       | 0.024 NM_013676         | 1.87         | <b>Supt5h</b>               | suppressor of Ty 5 homolog (S. cerevisiae)                                                                                  | 0006357 // regulation of transcription from RNA polymerase II promoter // inferred from electr     |
| 24.47387 44.5047        | 0.012 NM_146061         | 1.87         | <b>Prr5</b>                 | proline rich 5 (renal)                                                                                                      | 0007049 // cell cycle // inferred from electronic annotation///0030335 // positive regulation of   |
| 32.2329 59.10203        | 0.023 NM_173368         | 1.87         | <b>Chd6</b>                 | chromodomain helicase DNA binding protein 6                                                                                 | 0006333 // chromatin assembly or disassembly // inferred from electronic annotation                |
| 110.2013 203.1034       | 0.012 NM_146030         | 1.87         | <b>Plekhh3</b>              | pleckstrin homology domain containing, family H (with MyTH4 domain) me                                                      | 0007165 // signal transduction // inferred from electronic annotation                              |

| [ICR, PBS]([ICR, SUL])p | RefSeq Transcript ID    | FC [PBS:SFN] | Gene Symbol                  | Gene Title                                                                                                 | Gene Ontology Biological Process                                                                  |
|-------------------------|-------------------------|--------------|------------------------------|------------------------------------------------------------------------------------------------------------|---------------------------------------------------------------------------------------------------|
| 447.5739 820.1391       | 0.025 NM_016747         | 1.87         | <b>Dlg3</b>                  | discs, large homolog 3 (Drosophila)                                                                        | 0005515 // protein binding // inferred from electronic annotation///0005515 // protein binding    |
| 106.0816 189.2577       | 0.033 NM_013495         | 1.87         | <b>Cpt1a</b>                 | carnitine palmitoyltransferase 1a, liver                                                                   | 0042755 // eating behavior // inferred from electronic annotation///0006810 // transport // inf   |
| 107.5898 197.2989       | 0.019 NM_010700         | 1.87         | <b>Ldlr</b>                  | low density lipoprotein receptor                                                                           | 0008202 // steroid metabolic process // inferred from electronic annotation///0008203 // chole    |
| 71.08664 127.684        | 0.036 NM_197940         | 1.87         | <b>Wipf2</b>                 | WAS/WASL interacting protein family, member 2                                                              | 0003779 // actin binding // inferred from electronic annotation                                   |
| 8715.003 15611.46       | 0.046 NM_011120         | 1.86         | <b>Prl7d1</b>                | prolactin family 7, subfamily d, member 1                                                                  | 0043537 // negative regulation of blood vessel endothelial cell migration // inferred from direct |
| 85.80798 152.241        | 0.039 NM_181072         | 1.86         | <b>Myo1e</b>                 | myosin IE                                                                                                  | 0006807 // nitrogen compound metabolic process // inferred from mutant phenotype///000182         |
| 295.6276 532.4476       | 0.019 NM_144922///NM_1  | 1.86         | <b>Hnnpul1</b>               | heterogeneous nuclear ribonucleoprotein U-like 1                                                           | 0006355 // regulation of transcription, DNA-dependent // inferred from electronic annotation//    |
| 225.7229 409.9263       | 0.014 NM_010153         | 1.86         | <b>ErbB3</b>                 | v-erb-b2 erythroblastic leukemia viral oncogene homolog 3 (avian)                                          | 0043524 // negative regulation of neuron apoptosis // inferred from mutant phenotype///00075      |
| 428.554 751.7423        | 0.046 NM_023598///XM_0i | 1.86         | <b>LOC100044968///Arid1</b>  | similar to modulator recognition factor 2///AT rich interactive domain 5B                                  | 0060021 // palate development // inferred from mutant phenotype///0060325 // face morphog         |
| 111.322 208.9804        | 0.024 XM_001478845///NN | 1.85         | <b>5830417110Rik///LOC6</b>  | similar to Dingo protein isoform 2///RIKEN cDNA 5830417110 gene                                            | 0006355 // regulation of transcription, DNA-dependent // inferred from electronic annotation      |
| 322.5857 596.9042       | 0.011 NM_010501         | 1.85         | <b>Ilf1t3</b>                | interferon-induced protein with tetratricopeptide repeats 3                                                | 0005488 // binding // inferred from electronic annotation                                         |
| 19.1484 35.43503        | 0.018 XM_001478962///XM | 1.85         | <b>Muc3</b>                  | mucin 3, intestinal                                                                                        | 0016324 // apical plasma membrane // inferred from direct assay                                   |
| 58.71035 106.2942       | 0.025 NM_175268///NM_2  | 1.84         | <b>Fam53b</b>                | family with sequence similarity 53, member B                                                               |                                                                                                   |
| 307.8058 567.5307       | 0.024 NM_177461         | 1.84         | <b>Mical1</b>                | microtubule associated monooxygenase, calponin and LIM domain containin                                    | 0005856 // cytoskeleton // inferred from electronic annotation///0005737 // cytoplasm // inferi   |
| 665.9888 1232.495       | 0.015 NM_172588         | 1.84         | <b>Serinc5</b>               | serine incorporator 5                                                                                      | 0006658 // phosphatidylserine metabolic process // inferred from sequence or structural similar   |
| 1613.667 2866.976       | 0.046 NM_001093766///NN | 1.83         | <b>Myadim</b>                | myeloid-associated differentiation marker                                                                  | 0016021 // integral to membrane // inferred from electronic annotation///0016020 // membrar       |
| 35.24829 62.94902       | 0.011 XM_001476544///XM | 1.83         | <b>Ttc28</b>                 | tetratricopeptide repeat domain 28                                                                         | 0005488 // binding // inferred from electronic annotation                                         |
| 787.5598 1384.153       | 0.047 NM_139149         | 1.82         | <b>Fus</b>                   | fusion, derived from t(12;16) malignant liposarcoma (human)                                                | 0045944 // positive regulation of transcription from RNA polymerase II promoter // inferred from  |
| 131.4118 236.1165       | 0.038 NM_080448         | 1.81         | <b>Srgap3</b>                | SLIT-ROBO Rho GTPase activating protein 3                                                                  | 0007165 // signal transduction // inferred from electronic annotation                             |
| 79.89884 139.4792       | 0.025 NM_010513         | 1.81         | <b>Igf1r</b>                 | insulin-like growth factor I receptor                                                                      | 0048009 // insulin-like growth factor receptor signaling pathway // inferred from sequence or st  |
| 750.2532 1312.093       | 0.023 NM_198703         | 1.81         | <b>Wnk1</b>                  | WNK lysine deficient protein kinase 1                                                                      | 0032776 // DNA methylation on cytosine // inferred from electronic annotation///0006468 // pr     |
| 67.28961 118.5715       | 0.030 NM_011929         | 1.81         | <b>Clcn6</b>                 | chloride channel 6                                                                                         | 0006821 // chloride transport // inferred from electronic annotation///0006811 // ion transport   |
| 58.44442 104.9145       | 0.022 NM_011345         | 1.80         | <b>Sele</b>                  | selectin, endothelial cell                                                                                 | 0007155 // cell adhesion // inferred from electronic annotation                                   |
| 122.1599 212.6065       | 0.036 NM_001025395///NM | 1.80         | <b>Src</b>                   | Rous sarcoma oncogene                                                                                      | 0006950 // response to stress // inferred from electronic annotation///0018108 // peptidyl-tyro   |
| 316.7528 550.055        | 0.031 NM_0011202///NM_0 | 1.80         | <b>Ptpn11</b>                | protein tyrosine phosphatase, non-receptor type 11                                                         | 0007409 // axonogenesis // inferred from mutant phenotype///0016311 // dephosphorylation //       |
| 324.0155 569.0248       | 0.011 NM_020006         | 1.80         | <b>Cdc42ep4</b>              | CDC42 effector protein (Rho GTPase binding) 4                                                              | 0031274 // positive regulation of pseudopodium assembly // inferred from electronic annotatio     |
| 356.1224 635.7925       | 0.021 NM_178612         | 1.80         | <b>Cnpy4</b>                 | canopy 4 homolog (zebrafish)                                                                               | 0032880 // regulation of protein localization // not recorded                                     |
| 121.4798 210.217        | 0.026 NM_007997         | 1.79         | <b>Fdxr</b>                  | ferredoxin reductase                                                                                       | 0008202 // steroid metabolic process // inferred from electronic annotation///0055114 // oxida    |
| 860.3024 1502.002       | 0.022 NM_030887         | 1.79         | <b>Jdp2</b>                  | Jun dimerization protein 2                                                                                 | 0006355 // regulation of transcription, DNA-dependent // inferred from electronic annotation//    |
| 197.5953 338.5231       | 0.040 NM_011385         | 1.79         | <b>Ski</b>                   | ski sarcoma viral oncogene homolog (avian)                                                                 | 0030326 // embryonic limb morphogenesis // inferred from mutant phenotype                         |
| 134.4079 240.2669       | 0.033 NM_001017426      | 1.79         | <b>Kdm6b</b>                 | KDM1 lysine (K)-specific demethylase 6B///Jumonji domain containing 3, n                                   | 0016568 // chromatin modification // inferred from electronic annotation///0055114 // oxidati     |
| 256.6292 453.266        | 0.027 NM_022995         | 1.79         | <b>Pmepa1</b>                | prostate transmembrane protein, androgen induced 1                                                         | 0005515 // protein binding // inferred from physical interaction                                  |
| 152.4786 261.2643       | 0.041 NM_001080819      | 1.79         | <b>Arid1a</b>                | AT rich interactive domain 1A (SWI-like)                                                                   | 0030520 // estrogen receptor signaling pathway // inferred from sequence or structural similarit  |
| 128.4421 224.4745       | 0.035 NM_199307         | 1.79         | <b>Ece1</b>                  | endothelin converting enzyme 1                                                                             | 0001921 // positive regulation of receptor recycling // inferred from electronic annotation///004 |
| 66.02708 113.9495       | 0.027 NM_019763         | 1.78         | <b>Spn</b>                   | SPEN homolog, transcriptional regulator (Drosophila)                                                       | 0045892 // negative regulation of transcription, DNA-dependent // inferred from direct assay//    |
| 24.74597 44.40036       | 0.031 NM_010167         | 1.78         | <b>Eya4</b>                  | eyes absent 4 homolog (Drosophila)                                                                         | 0007275 // multicellular organismal development // inferred from electronic annotation///0008     |
| 30.8225 53.1494         | 0.031 XM_001003576///XM | 1.78         | <b>Rnf157</b>                | ring finger protein 157                                                                                    | 0005515 // protein binding // inferred from electronic annotation///0046872 // metal ion bindir   |
| 198.9192 353.2621       | 0.013 NM_009288         | 1.77         | <b>Stk10</b>                 | serine/threonine kinase 10                                                                                 | 0006468 // protein amino acid phosphorylation // inferred from electronic annotation              |
| 107.5748 181.7082       | 0.048 XM_001478275///NN | 1.77         | <b>Stk11ip1///LOC1000474</b> | similar to serine/threonine kinase 11 interacting protein///serine/threonine kinase 11 interacting proteir | 0003774 // motor activity // inferred from electronic annotation                                  |
| 76.59496 132.9639       | 0.022 NM_026599///XM_0i | 1.77         | <b>Cgml1</b>                 | cingulin-like 1                                                                                            | 0016311 // dephosphorylation // inferred from electronic annotation///0006470 // protein amir     |
| 367.749 643.698         | 0.011 NM_011207         | 1.77         | <b>Ptpn3</b>                 | protein tyrosine phosphatase, non-receptor type 3                                                          | 0019941 // modification-dependent protein catabolic process // inferred from electronic annota    |
| 41.73602 72.87556       | 0.006 NM_025958         | 1.76         | <b>Cand2</b>                 | cullin-associated and neddylation-dissociated 2 (putative)                                                 | 0007264 // small GTPase mediated signal transduction // inferred from electronic annotation///    |
| 66.93405 113.8756       | 0.029 NM_001037136///NN | 1.76         | <b>Agap1</b>                 | ArfGAP with GTPase domain, ankyrin repeat and PH domain 1 (Agap1), tra                                     | 0019067 // viral assembly, maturation, egress, and release // inferred from electronic annotatio  |
| 220.5379 380.1808       | 0.016 NM_011046///NM_0  | 1.76         | <b>Furin</b>                 | furin (paired basic amino acid cleaving enzyme)                                                            | 0007185 // transmembrane receptor protein tyrosine phosphatase signaling pathway // inferrec      |
| 77.23624 132.5177       | 0.008 NM_011212         | 1.76         | <b>Ptpre</b>                 | protein tyrosine phosphatase, receptor type, E                                                             | 0016021 // integral to membrane // inferred from electronic annotation///0016020 // membrar       |
| 253.2188 435.5927       | 0.018 NM_172257         | 1.75         | <b>Sidt2</b>                 | SID1 transmembrane family, member 2                                                                        | 0007520 // myoblast fusion // inferred from mutant phenotype///0030220 // platelet formation      |
| 909.9778 1564.273       | 0.009 NM_022410         | 1.75         | <b>Myh9</b>                  | myosin, heavy polypeptide 9, non-muscle                                                                    | 0001558 // regulation of cell growth // inferred from electronic annotation                       |
| 194.1107 333.0233       | 0.046 NM_015800         | 1.75         | <b>Crim1</b>                 | cysteine rich transmembrane BMP regulator 1 (chordin like)                                                 | 0030718 // germ-line stem cell maintenance // inferred from mutant phenotype///0006355 // r       |
| 175.302 299.1705        | 0.024 NM_001025432      | 1.75         | <b>Crebbp</b>                | CREB binding protein                                                                                       | 0051402 // neuron apoptosis // inferred from direct assay///0006506 // GPI anchor biosynthetic    |
| 73.15476 127.3696       | 0.005 NM_133779         | 1.75         | <b>Pigt</b>                  | phosphatidylinositol glycan anchor biosynthesis, class T                                                   | 0007275 // multicellular organismal development // inferred from electronic annotation///0030     |
| 271.6172 465.2588       | 0.010 NM_010928         | 1.75         | <b>Notch2</b>                | Notch gene homolog 2 (Drosophila)                                                                          | 0019941 // modification-dependent protein catabolic process // inferred from electronic annota    |
| 194.5272 332.9098       | 0.010 XM_001479450///XM | 1.74         | <b>Ubr4</b>                  | ubiquitin protein ligase E3 component n-recognin 4                                                         | 0005515 // protein binding // inferred from electronic annotation///0046872 // metal ion bindir   |
| 198.4744 332.1699       | 0.033 NM_153762         | 1.74         | <b>Rnf26</b>                 | ring finger protein 26                                                                                     | 0006270 // DNA replication initiation // inferred from electronic annotation///0006268 // DNA t   |
| 143.3857 239.6876       | 0.049 NM_008567         | 1.74         | <b>Mcm6</b>                  | minichromosome maintenance deficient 6 (MISS homolog, S. pombe) (S. c                                      | 0030048 // actin filament-based movement // inferred from mutant phenotype///0006928 // ce        |
| 716.998 1223.807        | 0.023 NM_153423         | 1.74         | <b>Wasf2</b>                 | WAS protein family, member 2                                                                               | 0007283 // spermatogenesis // inferred from mutant phenotype///0055114 // oxidation reducti       |
| 330.8602 563.0998       | 0.026 NM_015729         | 1.74         | <b>Acox1</b>                 | Acyl-Coenzyme A oxidase 1, palmitoyl (Acox1), mRNA///acyl-Coenzyme A c                                     | 0007242 // intracellular signaling cascade // inferred from electronic annotation///0035023 // ri |
| 83.03812 141.2276       | 0.031 NM_001081290      | 1.73         | <b>Bat2d</b>                 | BAT2 domain containing 1                                                                                   | 0005515 // protein binding // inferred from physical interaction                                  |
| 109.8652 183.4712       | 0.042 NM_001130152///NN | 1.73         | <b>Arhgef1</b>               | Rho guanine nucleotide exchange factor (GEF) 1                                                             | 0007049 // cell cycle // inferred from electronic annotation///0007165 // signal transduction //  |
| 8.889217 15.54586       | 0.021 NM_025413///NM_0  | 1.73         | <b>Lce1g///Lce1f///Lce1c</b> | late cornified envelope 1G///late cornified envelope 1C///late cornified en                                |                                                                                                   |
| 68.44147 117.7525       | 0.002 NM_146258         | 1.73         | <b>Stard13</b>               | StAR-related lipid transfer (START) domain containing 13                                                   |                                                                                                   |

| [ICR, PBS]([ICR, SUL])p | RefSeq Transcript ID   | FC [PBS:SFN] | Gene Symbol               | Gene Title                                                                   | Gene Ontology Biological Process                                                                   |
|-------------------------|------------------------|--------------|---------------------------|------------------------------------------------------------------------------|----------------------------------------------------------------------------------------------------|
| 2843.996 4773.549       | 0.035 NM_009255        | 1.73         | <b>Serpine2</b>           | serine (or cysteine) peptidase inhibitor, clade E, member 2                  | 0007275 // multicellular organismal development // inferred from electronic annotation//0030       |
| 258.6336 437.6887       | 0.042 NM_001111121//XN | 1.73         | <b>Ccdc6</b>              | coiled-coil domain containing 6                                              |                                                                                                    |
| 275.6439 456.0472       | 0.048 NM_133791        | 1.73         | <b>Wwc2</b>               | WW, C2 and coiled-coil domain containing 2                                   | 0005515 // protein binding // inferred from electronic annotation                                  |
| 219.0385 366.4841       | 0.019 NM_010813        | 1.72         | <b>Mnt</b>                | max binding protein                                                          | 0051726 // regulation of cell cycle // inferred from mutant phenotype//0006355 // regulation c     |
| 96.78254 165.8212       | 0.027 NM_008239        | 1.72         | <b>Foxq1</b>              | forkhead box Q1                                                              | 0031069 // hair follicle morphogenesis // inferred from mutant phenotype//0006355 // regulat       |
| 16.96264 29.73057       | 0.039 NM_001081153     | 1.72         | <b>Unc13c</b>             | unc-13 homolog C (C. elegans)                                                | 0006887 // exocytosis // inferred from electronic annotation//0007242 // intracellular signaling   |
| 66.70499 111.6266       | 0.019 NM_009873        | 1.72         | <b>Cdk6</b>               | cyclin-dependent kinase 6                                                    | 0007049 // cell cycle // inferred from electronic annotation//0043697 // cell dedifferentiation /  |
| 4320.835 7265.781       | 0.041 NM_001037859     | 1.72         | <b>Csf1r</b>              | colony stimulating factor 1 receptor                                         | 0007169 // transmembrane receptor protein tyrosine kinase signaling pathway // inferred from       |
| 65.67841 111.599        | 0.004 NM_011078        | 1.72         | <b>Phf2</b>               | PHD finger protein 2                                                         | 0005515 // protein binding // inferred from electronic annotation//0046872 // metal ion bindir     |
| 167.588 282.5595        | 0.043 NM_177390        | 1.72         | <b>Myo1d</b>              | myosin ID                                                                    | 0003774 // motor activity // inferred from electronic annotation//0005524 // ATP binding // ini    |
| 230.6678 385.8307       | 0.013 NM_176850        | 1.72         | <b>Bptf</b>               | bromodomain PHD finger transcription factor                                  | 0006338 // chromatin remodeling // inferred from sequence or structural similarity//0045449 /      |
| 114.484 189.2923        | 0.038 NM_008224        | 1.71         | <b>Hcfc1</b>              | host cell factor C1                                                          | 0007049 // cell cycle // inferred from electronic annotation//0019046 // reactivation of latent v  |
| 354.8626 586.1923       | 0.043 NM_009149        | 1.71         | <b>Glg1</b>               | golgi apparatus protein 1                                                    | 0005529 // sugar binding // inferred from electronic annotation                                    |
| 154.8218 258.7969       | 0.014 NM_001159634//NN | 1.71         | <b>Bat2l</b>              | HLA-B associated transcript 2-like                                           |                                                                                                    |
| 450.1612 743.838        | 0.049 NM_015804        | 1.71         | <b>Atp11a</b>             | ATPase, class VI, type 11A                                                   | 0015914 // phospholipid transport // inferred from electronic annotation//0006754 // ATP bios      |
| 73.63207 123.7675       | 0.021 NM_172856        | 1.71         | <b>Lass6</b>              | LAG1 homolog, ceramide synthase 6//LAG1 homolog, ceramide synthase           | 0030148 // sphingolipid biosynthetic process // inferred from direct assay//0046513 // ceramic     |
| 227.1453 384.099        | 0.017 NM_001013371     | 1.71         | <b>Dtx3l</b>              | deltex 3-like (Drosophila)                                                   | 0005515 // protein binding // inferred from electronic annotation//0046872 // metal ion bindir     |
| 93.38088 158.1319       | 0.011 XM_893956//XM_9C | 1.71         | <b>Mil5</b>               | myeloid/lymphoid or mixed-lineage leukemia 5                                 | 0016568 // chromatin modification // inferred from electronic annotation//0007049 // cell cycl     |
| 69.06372 114.7385       | 0.012 NM_013845        | 1.71         | <b>Ror1</b>               | receptor tyrosine kinase-like orphan receptor 1                              | 0007169 // transmembrane receptor protein tyrosine kinase signaling pathway // inferred from       |
| 57.98469 97.48911       | 0.022 NM_033072        | 1.70         | <b>Mbd6</b>               | methyl-CpG binding domain protein 6                                          | 0003677 // DNA binding // inferred from electronic annotation                                      |
| 79.57723 132.5319       | 0.014 NM_001003912     | 1.70         | <b>Arhgef11</b>           | CDNA clone IMAGE:30669655//Rho guanine nucleotide exchange factor (          | 0007242 // intracellular signaling cascade // inferred from electronic annotation//0035023 // r    |
| 425.1166 702.6921       | 0.029 NM_010638        | 1.70         | <b>Klf9</b>               | Kruppel-like factor 9                                                        | 0007566 // embryo implantation // inferred from direct assay//0006355 // regulation of transc      |
| 82.32908 137.7479       | 0.035 NM_001081247     | 1.70         | <b>Polr3a</b>             | polymerase (RNA) III (DNA directed) polypeptide A                            | 0006350 // transcription // inferred from electronic annotation                                    |
| 404.1304 662.8152       | 0.049 NM_001034030//NN | 1.70         | <b>Limk2</b>              | LIM motif-containing protein kinase 2                                        | 0007283 // spermatogenesis // inferred from mutant phenotype//0006468 // protein amino ac          |
| 253.9015 425.1217       | 0.003 NM_178392        | 1.70         | <b>Snapc1</b>             | small nuclear RNA activating complex, polypeptide 1                          | 0006355 // regulation of transcription, DNA-dependent // inferred from electronic annotation//     |
| 199.7704 330.2058       | 0.021 XM_204015//NM_0I | 1.69         | <b>Rere</b>               | arginine glutamic acid dipeptide (RE) repeats//Arginine glutamic acid dipe   | 0007275 // multicellular organismal development // inferred from electronic annotation//0006       |
| 117.0877 198.0725       | 0.011 NM_178242//XM_3I | 1.69         | <b>Tnfr18</b>             | Zinc finger protein 469, mRNA (cDNA clone IMAGE:5321785)//triple             | 0006869 // lipid transport // inferred from electronic annotation                                  |
| 534.7604 880.5059       | 0.029 NM_138310        | 1.69         | <b>ApoB48r</b>            | apolipoprotein B48 receptor                                                  | 0008202 // steroid metabolic process // inferred from electronic annotation//0006869 // lipid t    |
| 530.3486 889.2313       | 0.030 NM_001145970//NN | 1.69         | <b>Mtap7d1</b>            | microtubule-associated protein 7 domain containing 1                         | 0005819 // spindle // inferred from electronic annotation                                          |
| 508.8031 850.4089       | 0.007 XM_915167//XM_9I | 1.69         | <b>Hectd1</b>             | HECT domain containing 1                                                     | 0019941 // modification-dependent protein catabolic process // inferred from electronic annota     |
| 59.86271 97.55676       | 0.044 NM_134087        | 1.69         | <b>Fam83h</b>             | family with sequence similarity 83, member H                                 | 0001503 // ossification // inferred from electronic annotation                                     |
| 85.27836 141.1566       | 0.030 XM_907140//XM_1I | 1.69         | <b>Akap13</b>             | A kinase (PRKA) anchor protein 13 (Akap13), mRNA//A kinase (PRKA) anch       | 0007242 // intracellular signaling cascade // inferred from electronic annotation//0035023 // r    |
| 72.97849 120.9264       | 0.011 NM_146129        | 1.69         | <b>Pcif1</b>              | PDX1 C-terminal inhibiting factor 1                                          | 0005515 // protein binding // inferred from electronic annotation                                  |
| 576.448 953.1678        | 0.008 NM_025994        | 1.69         | <b>Efh2</b>               | EF hand domain containing 2                                                  | 0005509 // calcium ion binding // inferred from electronic annotation//0005515 // protein binc     |
| 420.6567 697.265        | 0.025 NM_009868        | 1.68         | <b>Cdh5</b>               | cadherin 5                                                                   | 0007156 // homophilic cell adhesion // inferred from electronic annotation//0007155 // cell ad     |
| 119.2826 197.0566       | 0.025 NM_178116        | 1.68         | <b>Camta2</b>             | calmodulin binding transcription activator 2                                 | 0006355 // regulation of transcription, DNA-dependent // inferred from electronic annotation//     |
| 157.8581 257.3333       | 0.042 NM_030210        | 1.68         | <b>Aacs</b>               | acetoacetyl-CoA synthetase                                                   | 0008152 // metabolic process // inferred from electronic annotation//0006629 // lipid metabol      |
| 84.953 139.014          | 0.022 NM_153062        | 1.68         | <b>Slc37a1</b>            | solute carrier family 37 (glycerol-3-phosphate transporter), member 1        |                                                                                                    |
| 564.3482 923.8051       | 0.026 NM_030249        | 1.68         | <b>Cttnbp2nl</b>          | CTTNBP2 N-terminal like                                                      | 0005730 // nucleolus // inferred from electronic annotation//0015629 // actin cytoskeleton // i    |
| 340.7094 553.8533       | 0.043 NM_009282//XM_0I | 1.68         | <b>LOC100045442//Stag</b> | similar to Stromal antigen 1//stromal antigen 1                              | 0051301 // cell division // inferred from electronic annotation//0007049 // cell cycle // inferrec |
| 64.18406 103.9823       | 0.045 NM_001080931     | 1.68         | <b>Med13</b>              | mediator complex subunit 13                                                  | 0006357 // regulation of transcription from RNA polymerase II promoter // inferred from electr     |
| 870.7371 1435.444       | 0.049 NM_028072        | 1.68         | <b>Sulf2</b>              | sulfatase 2                                                                  | 0008152 // metabolic process // inferred from electronic annotation//0006790 // sulfur metab       |
| 287.9308 467.1397       | 0.041 NM_009282//XM_0I | 1.67         | <b>LOC100045442//Stag</b> | similar to Stromal antigen 1//Stromal antigen 1 (Stag1), mRNA//stromal       | 0051301 // cell division // inferred from electronic annotation//0007049 // cell cycle // inferrec |
| 166.9485 274.9643       | 0.005 NM_018748        | 1.67         | <b>Golga4</b>             | golgi autoantigen, golgin subfamily a, 4                                     | 0005794 // Golgi apparatus // inferred from direct assay//0000139 // Golgi membrane // inferr      |
| 1454.582 2394.269       | 0.025 NM_145928        | 1.67         | <b>Tspan14</b>            | tetraspanin 14                                                               | 0016021 // integral to membrane // inferred from electronic annotation//0016020 // membrar         |
| 205.019 332.0504        | 0.046 NM_001033198     | 1.67         | <b>Ankrd50</b>            | ankyrin repeat domain 50                                                     |                                                                                                    |
| 268.3549 432.1902       | 0.040 NM_007516//NM_0  | 1.67         | <b>Hnrnpd</b>             | heterogeneous nuclear ribonucleoprotein D                                    | 0006355 // regulation of transcription, DNA-dependent // inferred from electronic annotation//     |
| 653.0924 1060.732       | 0.022 NM_010123        | 1.67         | <b>Eif3a</b>              | eukaryotic translation initiation factor 3, subunit A                        | 0001732 // formation of translation initiation complex // inferred from direct assay//0006412 /    |
| 196.5726 138.9371       | 0.038 NM_011417        | 1.67         | <b>Smarca4</b>            | SWI/SNF related, matrix associated, actin dependent regulator of chromati    | 0006334 // nucleosome assembly // traceable author statement//0030198 // extracellular mat         |
| 3339.432 5442.125       | 0.021 NM_026381//NM_0  | 1.67         | <b>Shisa5</b>             | shisa homolog 5 (Xenopus laevis)                                             | 0006915 // apoptosis // inferred from electronic annotation//0006915 // apoptosis // inferred      |
| 914.905 1483.796        | 0.018 NM_010301        | 1.67         | <b>Gna11</b>              | guanine nucleotide binding protein, alpha 11                                 | 0007186 // G-protein coupled receptor protein signaling pathway // inferred from mutant phen       |
| 32.27441 53.55214       | 0.015 NM_133957//NM_0  | 1.67         | <b>Nfat5</b>              | Nuclear factor of activated T-cells 5 (Nfat5), transcript variant a, mRNA//n | 0001816 // cytokine production // inferred from direct assay//0006355 // regulation of transcr     |
| 85.27412 137.1208       | 0.038 NM_172689        | 1.66         | <b>Ddx58</b>              | DEAD (Asp-Glu-Ala-Asp) box polypeptide 58                                    | 0009615 // response to virus // inferred from electronic annotation//0045087 // innate immun       |
| 587.9249 950.9334       | 0.041 NM_133758        | 1.66         | <b>Usp47</b>              | ubiquitin specific peptidase 47                                              | 0019941 // modification-dependent protein catabolic process // inferred from electronic annota     |
| 359.9723 594.2253       | 0.026 NM_146099        | 1.66         | <b>D19Wsu162e</b>         | DNA segment, Chr 19, Wayne State University 162, expressed                   | 0016021 // integral to membrane // inferred from electronic annotation//0016020 // membrar         |
| 6210.787 9975.187       | 0.045 NM_011576        | 1.66         | <b>Tfpi</b>               | tissue factor pathway inhibitor                                              | 0007596 // blood coagulation // inferred from electronic annotation                                |
| 241.8179 390.9808       | 0.019 NM_133665        | 1.66         | <b>Mef2d</b>              | myocyte enhancer factor 2D                                                   | 0006915 // apoptosis // inferred from electronic annotation//0007275 // multicellular organisn     |
| 154.3802 252.1895       | 0.014 NM_007865        | 1.66         | <b>Dll1</b>               | delta-like 1 (Drosophila)                                                    | 0007275 // multicellular organismal development // inferred from electronic annotation//0009       |
| 16.28592 27.11514       | 0.017 NM_178655//NM_0  | 1.66         | <b>Ank2</b>               | ankyrin 2, brain                                                             | 0007165 // signal transduction // inferred from electronic annotation//0034394 // protein loca     |
| 176.6948 286.5571       | 0.033 NM_144868        | 1.65         | <b>Pcnx13</b>             | pecanex-like 3 (Drosophila)                                                  | 0016021 // integral to membrane // inferred from electronic annotation//0016020 // membrar         |



| [ICR, PBS]([ICR, SUL])p | RefSeq Transcript ID    | FC [PBS:SFN] | Gene Symbol                | Gene Title                                                                               | Gene Ontology Biological Process                                                                   |
|-------------------------|-------------------------|--------------|----------------------------|------------------------------------------------------------------------------------------|----------------------------------------------------------------------------------------------------|
| 224.0976 357.7112       | 0.041 NM_001001144///NM | 1.65         | <i>Scap</i>                | SREBF chaperone                                                                          | 0008202 // steroid metabolic process // inferred from electronic annotation///0008203 // chole     |
| 254.8455 413.8673       | 0.006 NM_013651         | 1.65         | <i>Sf3a2</i>               | splicing factor 3a, subunit 2                                                            | 0008380 // RNA splicing // inferred from electronic annotation///0006397 // mRNA processing /      |
| 82.91287 133.9181       | 0.006 NM_001081373      | 1.64         | <i>Cep164</i>              | centrosomal protein 164                                                                  | 0006974 // response to DNA damage stimulus // inferred from electronic annotation///0051301        |
| 307.0527 492.6299       | 0.020 NM_148932         | 1.64         | <i>Pom121</i>              | nuclear pore membrane protein 121                                                        | 0051028 // mRNA transport // inferred from electronic annotation///0065002 // intracellular pr     |
| 29.4817 49.10988        | 0.048 NR_001461         | 1.64         | <i>Kcnq1ot1</i>            | KCNQ1 overlapping transcript 1                                                           | 0016458 // gene silencing // inferred from direct assay///0010216 // maintenance of DNA meth       |
| 121.2904 199.9306       | 0.030 NM_175666         | 1.63         | <i>Hist2h2bb</i>           | histone locus 2, H2bb                                                                    | 0006334 // nucleosome assembly // inferred from electronic annotation                              |
| 130.1009 209.0963       | 0.010 NM_009089         | 1.63         | <i>Polr2a</i>              | polymrase (RNA) II (DNA directed) polypeptide A                                          | 0006366 // transcription from RNA polymerase II promoter // inferred from electronic annotati      |
| 92.93684 149.5848       | 0.008 XR_032210         | 1.63         | <i>LOC100045684</i>        | similar to N-myristoyltransferase 1                                                      |                                                                                                    |
| 454.8436 739.0208       | 0.016 NM_010253         | 1.63         | <i>Gal</i>                 | galanin                                                                                  | 0006950 // response to stress // inferred from electronic annotation///0031943 // regulation of    |
| 198.0269 318.2334       | 0.011 NM_010111         | 1.63         | <i>Efnb2</i>               | ephrin B2                                                                                | 0007275 // multicellular organismal development // inferred from electronic annotation///0001      |
| 49.54213 80.23303       | 0.038 NM_026083         | 1.63         | <i>Zc3h13</i>              | zinc finger CCHC type containing 13                                                      | 0046872 // metal ion binding // inferred from electronic annotation///0008270 // zinc ion bindi    |
| 539.9053 881.6233       | 0.038 NM_011058///NM_0  | 1.63         | <i>Pdgfra</i>              | platelet derived growth factor receptor, alpha polypeptide                               | 0060021 // palate development // inferred from mutant phenotype///0060325 // face morphog          |
| 96.56848 156.9758       | 0.024 NM_170599         | 1.62         | <i>Igfb1</i>               | immunoglobulin superfamily, member 11                                                    | 0007155 // cell adhesion // inferred from electronic annotation///0040008 // regulation of grow    |
| 306.019 480.1687        | 0.038 NM_138659         | 1.62         | <i>Prpf8</i>               | pre-mRNA processing factor 8                                                             | 0008380 // RNA splicing // inferred from electronic annotation///0006397 // mRNA processing /      |
| 66.96044 109.5213       | 0.043 NM_001033212      | 1.62         | <i>Rprml</i>               | reprimin-like                                                                            | 0016021 // integral to membrane // inferred from electronic annotation///0016020 // membrar        |
| 128.9385 203.384        | 0.028 NM_057171         | 1.62         | <i>Bat3</i>                | HLA-B-associated transcript 3                                                            | 0042981 // regulation of apoptosis // inferred from reviewed computational analysis///0006915      |
| 63.85999 100.1216       | 0.028 NM_011379         | 1.61         | <i>Sipa1</i>               | signal-induced proliferation associated gene 1                                           | 0051726 // regulation of cell cycle // inferred from direct assay///0051056 // regulation of small |
| 180.3007 287.9438       | 0.023 NM_023544///NM_0  | 1.61         | <i>Rsc1a1///Ddi2</i>       | DNA-damage inducible protein 2///regulatory solute carrier protein, family               | 0051051 // negative regulation of transport // inferred from electronic annotation///0050892 //    |
| 550.3471 888.0051       | 0.034 NM_011480         | 1.61         | <i>Sreb1</i>               | sterol regulatory element binding transcription factor 1                                 | 0008202 // steroid metabolic process // inferred from electronic annotation///0006355 // regul.    |
| 199.9897 312.6738       | 0.031 NM_022882         | 1.61         | <i>Lpin2</i>               | Lipin 2, mRNA (cDNA clone MGC:46819 IMAGE:5101211)///lipin 2                             | 0008195 // phosphatidate phosphatase activity // inferred from direct assay                        |
| 144.9849 229.1207       | 0.015 NM_028412         | 1.61         | <i>Ciz1</i>                | CDKN1A interacting zinc finger protein 1                                                 | 0046872 // metal ion binding // inferred from electronic annotation///0008270 // zinc ion bindi    |
| 36.40942 57.92859       | 0.002 NM_009297         | 1.61         | <i>Supt6h</i>              | suppressor of Ty 6 homolog (S. cerevisiae)                                               | 0006357 // regulation of transcription from RNA polymerase II promoter // inferred from electr     |
| 57.29696 91.00245       | 0.024 NM_001033759///NM | 1.61         | <i>Tmem2</i>               | Transmembrane protein 2 (Tmem2), transcript variant 1, mRNA///transme                    | 0016021 // integral to membrane // inferred from electronic annotation///0016020 // membrar        |
| 23.34509 37.35414       | 0.005 NM_009405         | 1.61         | <i>Tnni2</i>               | troponin I, skeletal, fast 2                                                             | 0045941 // positive regulation of transcription // inferred from electronic annotation///0003005   |
| 92.19415 146.5433       | 0.001 NM_001114386///NM | 1.61         | <i>Nedd4l</i>              | neural precursor cell expressed, developmentally down-regulated gene 4-l                 | 0010766 // negative regulation of sodium ion transport // inferred from direct assay///0019941     |
| 377.2236 592.6205       | 0.021 NM_001005331///NM | 1.61         | <i>Elf4g1</i>              | eukaryotic translation initiation factor 4, gamma 1                                      | 0006412 // translation // inferred from electronic annotation///0016070 // RNA metabolic proci     |
| 88.74268 138.6623       | 0.042 NM_022022///XM_0  | 1.61         | <i>Ube4b</i>               | ubiquitination factor E4B, UFD2 homolog (S. cerevisiae)///Ubiquitination f               | 0019941 // modification-dependent protein catabolic process // inferred from electronic annota     |
| 160.3729 252.7411       | 0.004 NM_153103         | 1.60         | <i>Kif1c</i>               | kinesin family member 1C                                                                 | 0006890 // retrograde vesicle-mediated transport, Golgi to ER // inferred from direct assay///00   |
| 197.9069 313.0269       | 0.005 NM_021899         | 1.60         | <i>Foxj2</i>               | forkhead box J2                                                                          | 0006355 // regulation of transcription, DNA-dependent // inferred from electronic annotation//     |
| 189.385 307.7082        | 0.046 NM_024440         | 1.60         | <i>Derl3</i>               | Der1-like domain family, member 3                                                        | 0005783 // endoplasmic reticulum // inferred from electronic annotation///0005789 // endopla       |
| 414.1126 655.2076       | 0.021 NM_009593         | 1.60         | <i>Abcg1</i>               | ATP-binding cassette, sub-family G (WHITE), member 1                                     | 0006869 // lipid transport // inferred from electronic annotation///0045449 // regulation of trar  |
| 60.70678 95.99432       | 0.005 NM_144812///NM_1  | 1.60         | <i>Tnrc6b</i>              | trinucleotide repeat containing 6b                                                       | 0006417 // regulation of translation // inferred from electronic annotation///0031047 // gene si   |
| 599.9963 956.6914       | 0.031 NM_011498         | 1.60         | <i>Bhlhe40</i>             | basic helix-loop-helix family, member e40                                                | 0045892 // negative regulation of transcription, DNA-dependent // inferred from direct assay//     |
| 175.181 271.003         | 0.043 NM_008633         | 1.60         | <i>Mtap4</i>               | microtubule-associated protein 4                                                         | 0007026 // negative regulation of microtubule depolymerization // inferred from electronic ann     |
| 1377.441 2192.68        | 0.027 NM_173182         | 1.60         | <i>Fndc3b</i>              | fibronectin type III domain containing 3B                                                | 0045600 // positive regulation of fat cell differentiation // inferred from physical interaction   |
| 186.8104 290.671        | 0.044 NM_027144         | 1.60         | <i>Arhgef12</i>            | Rho guanine nucleotide exchange factor (GEF) 12                                          | 0007242 // intracellular signaling cascade // inferred from electronic annotation///0007186 // G   |
| 1313.981 2044.088       | 0.029 NM_146130///XM_8  | 1.59         | <i>LOC100045099///OTTI</i> | predicted gene, EG627828///predicted gene, OTTMUSG00000004599///si                       | 0008380 // RNA splicing // inferred from electronic annotation///0006397 // mRNA processing /      |
| 99.51416 153.988        | 0.049 NM_001081255      | 1.59         | <i>Lrch3</i>               | Leucine-rich repeats and calponin homology (CH) domain containing 3, mR                  | 0005515 // protein binding // inferred from electronic annotation                                  |
| 99.03201 157.2356       | 0.015 NM_021521         | 1.59         | <i>Med12</i>               | mediator of RNA polymerase II transcription, subunit 12 homolog (yeast)                  | 0035176 // social behavior // inferred from mutant phenotype///0006357 // regulation of transi     |
| 116.5475 181.5619       | 0.031 NM_138679         | 1.59         | <i>Ash1</i>                | ash1 (absent, small, or homeotic)-like (Drosophila)                                      | 0016568 // chromatin modification // inferred from electronic annotation///0006355 // regulati     |
| 305.6621 481.4534       | 0.002 NM_001145952///NM | 1.59         | <i>Lpp</i>                 | LIM domain containing preferred translocation partner in lipoma///LIM do                 | 0007155 // cell adhesion // inferred from electronic annotation                                    |
| 89.41513 141.7813       | 0.029 XM_001481284///XN | 1.59         | <i>Wipf3</i>               | WAS/WASL interacting protein family, member 3                                            | 0007275 // multicellular organismal development // inferred from electronic annotation///0030      |
| 472.7928 762.8283       | 0.048 NM_172685         | 1.59         | <i>Slc25a24</i>            | solute carrier family 25 (mitochondrial carrier, phosphate carrier), member              | 0006810 // transport // inferred from electronic annotation                                        |
| 148.7044 229.8842       | 0.043 XM_001476519///NM | 1.59         | <i>Brd1///LOC100045983</i> | similar to bromodomain containing 1///bromodomain containing 1                           | 0005515 // protein binding // inferred from electronic annotation///0046872 // metal ion bindir    |
| 61.34346 98.28765       | 0.032 NM_008616///NM_0  | 1.59         | <i>Zfp239</i>              | zinc finger protein 239                                                                  | 0006355 // regulation of transcription, DNA-dependent // inferred from electronic annotation//     |
| 481.8109 748.8629       | 0.031 NM_009045         | 1.59         | <i>Rela</i>                | v-rel reticuloendotheliosis viral oncogene homolog A (avian)                             | 0051092 // positive regulation of NF-kappaB transcription factor activity // inferred from electro |
| 394.1875 616.3745       | 0.016 NM_175344         | 1.58         | <i>Ano6</i>                | anoctamin 6                                                                              | 0006811 // ion transport // inferred from electronic annotation///0006810 // transport // inferr   |
| 143.186 221.0468        | 0.026 NM_010613         | 1.58         | <i>Khsrp</i>               | KH-type splicing regulatory protein                                                      | 0006412 // translation // inferred from electronic annotation///0051028 // mRNA transport // i     |
| 92.5527 144.7332        | 0.024 NM_001081057      | 1.58         | <i>Tecpr2</i>              | tectonin beta-propeller repeat containing 2                                              | 0005634 // nucleus // inferred from electronic annotation///0005737 // cytoplasm // inferred fr    |
| 340.354 533.0895        | 0.021 NM_001033275      | 1.58         | <i>Glt8d3</i>              | glycosyltransferase 8 domain containing 3                                                | 0016757 // transferase activity, transferring glycosyl groups // inferred from electronic annotati |
| 334.4582 514.9414       | 0.033 NM_007460         | 1.58         | <i>Ap3d1</i>               | adaptor-related protein complex 3, delta 1 subunit                                       | 0048007 // antigen processing and presentation, exogenous lipid antigen via MHC class Ib // infe   |
| 119.3363 183.6027       | 0.038 NM_145970         | 1.58         | <i>Cc2d1a</i>              | coiled-coil and C2 domain containing 1A                                                  | 0006355 // regulation of transcription, DNA-dependent // inferred from electronic annotation//     |
| 261.5124 401.6401       | 0.032 NM_133947         | 1.58         | <i>Numa1</i>               | Nuclear mitotic apparatus protein 1 (Numa1), mRNA///nuclear mitotic app                  | 0051321 // meiotic cell cycle // inferred from electronic annotation                               |
| 557.5716 859.9428       | 0.036 NM_146012///XR_03 | 1.58         | <i>Ctdsp2///ENSMUSG00</i>  | CTD (carboxy-terminal domain, RNA polymerase II, polypeptide A) small ph                 | 0016791 // phosphatase activity // inferred from electronic annotation///0004721 // phosphop       |
| 59.91959 92.56378       | 0.015 NM_001114609///NM | 1.58         | <i>Ino80d</i>              | INO80 complex subunit D                                                                  |                                                                                                    |
| 178.9488 274.9617       | 0.027 NM_007795         | 1.58         | <i>Ctf1</i>                | cardiotrophin 1                                                                          | 0048666 // neuron development // inferred from genetic interaction                                 |
| 40.61821 63.71928       | 0.006 XM_001477657///XN | 1.58         | <i>BC059842</i>            | cDNA sequence BC059842///PREDICTED: Mus musculus cDNA sequence BC059842 (BC059842), mRNA |                                                                                                    |
| 272.0418 421.186        | 0.031 NM_001081298///XR | 1.58         | <i>Lphn2///LOC10004805</i> | latrophilin 2///similar to calcium-independent alpha-latrotoxin receptor hc              | 0007165 // signal transduction // inferred from electronic annotation///0007218 // neuropeptid     |
| 48.78642 75.21652       | 0.049 NM_017401         | 1.58         | <i>Polm</i>                | polymerase (DNA directed), mu                                                            | 0030183 // B cell differentiation // inferred from mutant phenotype///0016446 // somatic hype      |
| 112.555 176.6525        | 0.026 NM_009755         | 1.57         | <i>Bmp1</i>                | bone morphogenetic protein 1                                                             | 0001503 // ossification // inferred from electronic annotation///0007275 // multicellular organi   |

| [ICR, PBS]([ICR, SUL])p | RefSeq Transcript ID    | FC [PBS:SFN] | Gene Symbol               | Gene Title                                                                                                                                                     | Gene Ontology Biological Process                                                                 |
|-------------------------|-------------------------|--------------|---------------------------|----------------------------------------------------------------------------------------------------------------------------------------------------------------|--------------------------------------------------------------------------------------------------|
| 429.6642 662.8736       | 0.010 NM_133852///NM_0  | 1.57         | <b>Golga2</b>             | golgi autoantigen, golgin subfamily a, 2                                                                                                                       | 0005515 // protein binding // inferred from electronic annotation                                |
| 81.00088 124.2209       | 0.031 NM_181071         | 1.57         | <b>Tanc2</b>              | tetratricopeptide repeat, ankyrin repeat and coiled-coil containing 2                                                                                          | 0005488 // binding // inferred from electronic annotation                                        |
| 127.7242 198.16         | 0.000 NM_007772         | 1.57         | <b>Hivp1</b>              | human immunodeficiency virus type I enhancer binding protein 1                                                                                                 | 0045892 // negative regulation of transcription, DNA-dependent // inferred from direct assay//   |
| 56.00654 86.90212       | 0.024 NM_177136///NM_0  | 1.57         | <b>Fryl</b>               | furry homolog-like (Drosophila)                                                                                                                                | 0005488 // binding // inferred from electronic annotation//0005515 // protein binding // infer   |
| 101.7255 155.3127       | 0.047 NM_001029994///NM | 1.57         | <b>Zc3h18</b>             | zinc finger CCHC-type containing 18                                                                                                                            | 0046872 // metal ion binding // inferred from electronic annotation//0008270 // zinc ion bindi   |
| 138.0526 214.6047       | 0.011 NM_001017427      | 1.57         | <b>Rasef</b>              | RAS and EF hand domain containing                                                                                                                              | 0007264 // small GTPase mediated signal transduction // inferred from electronic annotation//    |
| 140.3343 216.3232       | 0.022 NM_001003815///NM | 1.57         | <b>Epb4.11</b>            | erythrocyte protein band 4.1-like 1                                                                                                                            | 0030866 // cortical actin cytoskeleton organization // inferred from electronic annotation       |
| 89.84402 139.3159       | 0.050 NM_001039530      | 1.57         | <b>Parp14</b>             | poly (ADP-ribose) polymerase family, member 14                                                                                                                 | 0006355 // regulation of transcription, DNA-dependent // inferred from electronic annotation//   |
| 116.495 179.0293        | 0.015 NM_177592         | 1.56         | <b>Tmem164</b>            | transmembrane protein 164///CDNA clone IMAGE:6815971                                                                                                           | 0016021 // integral to membrane // inferred from electronic annotation//0016020 // membr         |
| 632.6245 970.8284       | 0.033 NM_145629         | 1.56         | <b>Pls3</b>               | plastin 3 (T-isoform)                                                                                                                                          | 0007015 // actin filament organization // inferred from electronic annotation                    |
| 74.1358 113.022         | 0.025 NM_009744         | 1.56         | <b>Bcl6</b>               | B-cell leukemia/lymphoma 6                                                                                                                                     | 0043380 // regulation of memory T cell differentiation // inferred from mutant phenotype//000    |
| 18.41829 28.43762       | 0.041 NM_199222         | 1.56         | <b>Lman1l</b>             | lectin, mannose-binding 1 like                                                                                                                                 | 0005529 // sugar binding // inferred from electronic annotation                                  |
| 713.3142 1101.267       | 0.026 NM_207515///NM_1  | 1.56         | <b>Mbnl2</b>              | muscleblind-like 2///MKIAA4072 protein                                                                                                                         | 0003723 // RNA binding // inferred from electronic annotation//0046872 // metal ion binding /    |
| 350.8924 536.263        | 0.029 NM_054097         | 1.56         | <b>Pip4k2c</b>            | phosphatidylinositol-5-phosphate 4-kinase, type II, gamma                                                                                                      | 0046488 // phosphatidylinositol metabolic process // inferred from electronic annotation         |
| 170.4751 262.1913       | 0.007 NM_009848         | 1.56         | <b>Entpd1</b>             | ectonucleoside triphosphate diphosphohydrolase 1                                                                                                               | 0030168 // platelet activation // inferred from direct assay//0009181 // purine ribonucleoside   |
| 29.36248 44.99492       | 0.010 NM_011518         | 1.56         | <b>Syk</b>                | Spleen tyrosine kinase (Syk), mRNA///spleen tyrosine kinase                                                                                                    | 0050731 // positive regulation of peptidyl-tyrosine phosphorylation // inferred from mutant phe  |
| 455.575 697.1745        | 0.008 NM_181594         | 1.56         | <b>Edc4</b>               | enhancer of mRNA decapping 4                                                                                                                                   | 0005515 // protein binding // inferred from electronic annotation                                |
| 151.4481 229.5615       | 0.033 NM_033144         | 1.55         | <b>8-Sep</b>              | septin 8                                                                                                                                                       | 0007049 // cell cycle // inferred from electronic annotation                                     |
| 194.0777 294.0106       | 0.042 XM_001474137///NM | 1.55         | <b>LOC100043998///Tpr</b> | translocated promoter region///similar to nuclear pore complex-associated                                                                                      | 0006412 // translation // inferred from electronic annotation//0006434 // seryl-tRNA aminoacyl   |
| 101.6337 157.5316       | 0.038 NM_183017         | 1.55         | <b>Ttl12</b>              | TTL domain protein (Ttl12 gene), strain C57BL6///tubulin tyrosine ligase-III                                                                                   | 0006464 // protein modification process // inferred from electronic annotation                   |
| 29.29646 44.46393       | 0.031 NM_133667         | 1.55         | <b>Pdk2</b>               | pyruvate dehydrogenase kinase, isoenzyme 2                                                                                                                     | 0007165 // signal transduction // inferred from electronic annotation//0005975 // carbohydrat    |
| 219.2237 334.5379       | 0.019 NM_130863         | 1.55         | <b>Adrbk1</b>             | adrenergic receptor kinase, beta 1                                                                                                                             | 0016310 // phosphorylation // inferred from electronic annotation//0007165 // signal transduc    |
| 1136.67 1717.159        | 0.043 NM_001033268      | 1.55         | <b>Fam120a</b>            | family with sequence similarity 120, member A                                                                                                                  | 0003723 // RNA binding // inferred from electronic annotation                                    |
| 68.28994 103.982        | 0.011 NM_001044719///NM | 1.55         | <b>D17Wsu92e</b>          | DNA segment, Chr 17, Wayne State University 92, expressed///DNA segment, Chr 17, Wayne State University 92, expressed, mRNA (cDNA clone MGC:178969 IMAGE:9053) | 0006544 // glycine metabolic process // inferred from electronic annotation//0006563 // L-seri   |
| 79.57266 122.4096       | 0.014 NM_028230         | 1.55         | <b>Shmt2</b>              | serine hydroxymethyltransferase 2 (mitochondrial)                                                                                                              | 0006468 // protein amino acid phosphorylation // inferred from electronic annotation             |
| 233.1955 357.2964       | 0.014 NM_007908         | 1.55         | <b>Eef2k</b>              | eukaryotic elongation factor-2 kinase                                                                                                                          | 0019941 // modification-dependent protein catabolic process // inferred from electronic annota   |
| 310.8276 479.9587       | 0.045 NM_007707         | 1.55         | <b>Socs3</b>              | suppressor of cytokine signaling 3                                                                                                                             |                                                                                                  |
| 50.73664 76.76267       | 0.037 NM_001001738      | 1.55         | <b>Itrip</b>              | inositol 1,4,5-triphosphate receptor interacting protein                                                                                                       |                                                                                                  |
| 211.457 322.2477        | 0.005 NM_153533         | 1.55         | <b>Tenc1</b>              | tensin like C1 domain-containing phosphatase                                                                                                                   | 0048871 // multicellular organismal homeostasis // inferred from mutant phenotype//0001822       |
| 97.72817 148.2722       | 0.034 NM_144872         | 1.55         | <b>Eml3</b>               | echinoderm microtubule associated protein like 3                                                                                                               | 0005874 // microtubule // inferred from electronic annotation//0005737 // cytoplasm // infer     |
| 46.74178 71.18797       | 0.049 NM_153543         | 1.55         | <b>Aldh12</b>             | aldehyde dehydrogenase 1 family, member L2                                                                                                                     | 0055114 // oxidation reduction // inferred from electronic annotation//0009058 // biosyntheti    |
| 66.26363 100.0645       | 0.019 NM_001110132///NM | 1.55         | <b>Cic</b>                | capicua homolog (Drosophila)                                                                                                                                   | 0006355 // regulation of transcription, DNA-dependent // inferred from electronic annotation//   |
| 104.5636 156.971        | 0.033 NM_173048         | 1.54         | <b>Gga3</b>               | golgi associated, gamma adaptin ear containing, ARF binding protein 3                                                                                          | 0006810 // transport // inferred from electronic annotation//0016192 // vesicle-mediated tran    |
| 105.2669 161.4533       | 0.011 NM_011424         | 1.54         | <b>Ncor2</b>              | nuclear receptor co-repressor 2                                                                                                                                | 0045892 // negative regulation of transcription, DNA-dependent // inferred from direct assay//   |
| 665.6628 1000.735       | 0.043 NM_144530         | 1.54         | <b>Zc3h11a</b>            | zinc finger CCHC type containing 11A                                                                                                                           | 0046872 // metal ion binding // inferred from electronic annotation//0008270 // zinc ion bindi   |
| 199.9942 301.5945       | 0.022 NM_015731         | 1.54         | <b>Atp9a</b>              | ATPase, class II, type 9A                                                                                                                                      | 0008152 // metabolic process // inferred from electronic annotation//0015914 // phospholipid     |
| 139.263 207.8604        | 0.034 NM_023544///NM_0  | 1.53         | <b>Rsc1a1///Ddi2</b>      | DNA-damage inducible protein 2///regulatory solute carrier protein, family                                                                                     | 0051051 // negative regulation of transport // inferred from electronic annotation//0050892 //   |
| 910.7809 1369.686       | 0.015 NM_146130///XM_8  | 1.53         | <b>LOC100045099///OTT</b> | predicted gene, EG627828///predicted gene, OTTMUSG00000004599///si                                                                                             | 0008380 // RNA splicing // inferred from electronic annotation//0006397 // mRNA processing /     |
| 24.45775 36.78954       | 0.029 NM_027560         | 1.53         | <b>Arddc2</b>             | arrestin domain containing 2                                                                                                                                   |                                                                                                  |
| 239.7012 362.9312       | 0.005 NM_011682         | 1.53         | <b>Utrn</b>               | utrophin                                                                                                                                                       | 0007528 // neuromuscular junction development // inferred from electronic annotation//0007       |
| 317.4151 474.4151       | 0.042 NM_133221         | 1.53         | <b>Slc24a6</b>            | solute carrier family 24 (sodium/potassium/calcium exchanger), member 6                                                                                        | 0006816 // calcium ion transport // inferred from electronic annotation//0006814 // sodium io    |
| 244.6859 370.7276       | 0.028 NM_019651         | 1.53         | <b>Ptpn9</b>              | protein tyrosine phosphatase, non-receptor type 9                                                                                                              | 0016311 // dephosphorylation // inferred from electronic annotation//0006470 // protein amir     |
| 78.12888 116.8522       | 0.029 NM_178236///NR_0C | 1.53         | <b>Asb7</b>               | ankyrin repeat and SOCS box-containing 7                                                                                                                       | 0019941 // modification-dependent protein catabolic process // inferred from electronic annota   |
| 34.23529 51.80119       | 0.045 NM_010820         | 1.53         | <b>Mpdz</b>               | multiple PDZ domain protein                                                                                                                                    | 0007155 // cell adhesion // inferred from direct assay                                           |
| 59.79078 89.56892       | 0.046 NM_025690///NM_0  | 1.53         | <b>Sltn</b>               | SAFB-like, transcription modulator                                                                                                                             | 0006915 // apoptosis // inferred from electronic annotation//0006355 // regulation of transcrip  |
| 59.55757 88.93058       | 0.033 NM_145416         | 1.52         | <b>Kri1</b>               | KRI1 homolog (S. cerevisiae)                                                                                                                                   |                                                                                                  |
| 21.31657 32.06295       | 0.027 NM_009004         | 1.52         | <b>Kif20a</b>             | kinesin family member 20A                                                                                                                                      | 0006810 // transport // inferred from electronic annotation//0007018 // microtubule-based m      |
| 116.8092 174.9726       | 0.014 NM_194346         | 1.52         | <b>Rnf31</b>              | ring finger protein 31                                                                                                                                         | 0016874 // ligase activity // inferred from electronic annotation//0046872 // metal ion binding  |
| 168.064 251.2349        | 0.020 NM_133940         | 1.52         | <b>Fbxl14</b>             | F-box and leucine-rich repeat protein 14                                                                                                                       | 0019941 // modification-dependent protein catabolic process // inferred from electronic annota   |
| 62.99466 93.62002       | 0.036 NM_033523         | 1.52         | <b>Spred2</b>             | spontin-related, EVH1 domain containing 2                                                                                                                      | 0007275 // multicellular organismal development // inferred from electronic annotation//0000     |
| 133.6452 199.1525       | 0.018 NM_021280         | 1.52         | <b>Plcg1</b>              | Phospholipase C, gamma 1 (Plcg1), mRNA///phospholipase C, gamma 1                                                                                              | 0050852 // T cell receptor signaling pathway // inferred from direct assay//0016042 // lipid cat |
| 310.7354 463.7519       | 0.015 XR_035649///NM_00 | 1.52         | <b>EG666167///Ewsr1</b>   | predicted gene, EG666167///Ewing sarcoma breakpoint region 1                                                                                                   | 0006355 // regulation of transcription, DNA-dependent // inferred from electronic annotation//   |
| 49.95923 73.98124       | 0.045 XR_034155///NM_00 | 1.51         | <b>LOC100048010///Cbl</b> | Casitas B-lineage lymphoma///Casitas B-lineage lymphoma (Cbl), mRNA///                                                                                         | 0019941 // modification-dependent protein catabolic process // inferred from electronic annota   |
| 188.6133 277.9381       | 0.024 NM_033371         | 1.51         | <b>Ppp1r16a</b>           | protein phosphatase 1, regulatory (inhibitor) subunit 16A                                                                                                      | 0005829 // cytosol // traceable author statement//0016020 // membrane // inferred from elec      |
| 140.9047 206.8401       | 0.031 NM_033563         | 1.51         | <b>Klf7</b>               | Kruppel-like factor 7 (ubiquitous)                                                                                                                             | 0048813 // dendrite morphogenesis // inferred from mutant phenotype//0007409 // axonog           |
| 171.6281 253.4763       | 0.021 NM_001081685///NM | 1.51         | <b>Zfp295</b>             | zinc finger protein 295                                                                                                                                        | 0005622 // intracellular // inferred from electronic annotation                                  |
| 120.1808 178.7498       | 0.039 NM_001081132      | 1.50         | <b>Upf2</b>               | UPF2 regulator of nonsense transcripts homolog (yeast)                                                                                                         | 0006986 // response to unfolded protein // not recorded//0016070 // RNA metabolic process /      |
| 70.50968 103.7012       | 0.029 NM_174868         | 1.50         | <b>Fam73a</b>             | family with sequence similarity 73, member A                                                                                                                   | 0016021 // integral to membrane // inferred from electronic annotation//0016020 // membr         |
| 120.1555 177.9817       | 0.026 NM_199028         | 1.50         | <b>Bend3</b>              | BEN domain containing 3                                                                                                                                        |                                                                                                  |
| 466.7545 695.7762       | 0.009 NM_030238         | 1.50         | <b>Dync1h1</b>            | dynein cytoplasmic 1 heavy chain 1                                                                                                                             | 0007018 // microtubule-based movement // inferred from electronic annotation                     |

| [ICR, PBS]([ICR, SUL])p | RefSeq Transcript ID    | FC [PBS:SFN] | Gene Symbol                       | Gene Title                                                                                                                                                          | Gene Ontology Biological Process                                                                  |
|-------------------------|-------------------------|--------------|-----------------------------------|---------------------------------------------------------------------------------------------------------------------------------------------------------------------|---------------------------------------------------------------------------------------------------|
| 206.2862 307.6928       | 0.011 NM_026014         |              | <b>1.50 Cdt1</b>                  | chromatin licensing and DNA replication factor 1                                                                                                                    | 0000076 // DNA replication checkpoint // inferred from electronic annotation///0000076 // DN      |
| 152.0945 226.2159       | 0.012 NM_001114097///NM |              | <b>1.50 Smarcc2</b>               | SWI/SNF related, matrix associated, actin dependent regulator of chromati                                                                                           | 0016568 // chromatin modification // inferred from electronic annotation///0006355 // regulati    |
| 222.6589 145.6392       | 0.010 NM_025683         |              | <b>-1.50 Rpe</b>                  | ribulose-5-phosphate-3-epimerase                                                                                                                                    | 0008152 // metabolic process // inferred from electronic annotation///0005975 // carbohydrate     |
| 656.3445 432.1881       | 0.004 NM_001130149///NM |              | <b>-1.50 LOC100045148///Rnas</b>  | ribonuclease III, nuclear///similar to ribonuclease III, nuclear                                                                                                    | 0006396 // RNA processing // inferred from electronic annotation                                  |
| 663.184 435.0452        | 0.025 NM_145392         |              | <b>-1.51 Bag2</b>                 | BCL2-associated athanogene 2                                                                                                                                        | 0019538 // protein metabolic process // inferred from electronic annotation///0006915 // apop     |
| 980.876 638.2849        | 0.011 NM_145405         |              | <b>-1.51 Ubl4</b>                 | ubiquitin-like 4                                                                                                                                                    | 0006464 // protein modification process // inferred from electronic annotation                    |
| 154.1863 100.299        | 0.032 NM_145133         |              | <b>-1.51 Tifa</b>                 | TRAF-interacting protein with forkhead-associated domain                                                                                                            | 0007249 // I-kappaB kinase/NF-kappaB cascade // inferred from direct assay                        |
| 510.9264 331.0704       | 0.023 NM_011883///NM_0  |              | <b>-1.51 Rnf13</b>                | ring finger protein 13                                                                                                                                              | 0005515 // protein binding // inferred from electronic annotation///0046872 // metal ion bindir   |
| 416.1779 267.4393       | 0.049 NM_029581         |              | <b>-1.51 Mti3</b>                 | mitochondrial translational initiation factor 3                                                                                                                     | 0032790 // ribosome disassembly // inferred from sequence or structural similarity///0006446 /    |
| 1091.826 710.4048       | 0.047 XM_001474604///NM |              | <b>-1.51 Higd1a///LOC1000457</b>  | predicted gene, ENSMUSG00000044330///HIG1 domain family, member 1                                                                                                   | 0006950 // response to stress // inferred from electronic annotation                              |
| 1168.432 769.4538       | 0.045 NM_026878         |              | <b>-1.52 Rasl11b</b>              | RAS-like, family 11, member B                                                                                                                                       | 0007264 // small GTPase mediated signal transduction // inferred from electronic annotation       |
| 1380.347 893.762        | 0.011 NM_025848         |              | <b>-1.52 Sdhb</b>                 | succinate dehydrogenase complex, subunit D, integral membrane protein                                                                                               | 0006810 // transport // inferred from electronic annotation///0006099 // tricarboxylic acid cycl  |
| 518.5929 332.9025       | 0.018 NM_026276         |              | <b>-1.52 Aasdhppt</b>             | aminoadipate-semialdehyde dehydrogenase-phosphopantetheinyl transfe                                                                                                 | 0009059 // macromolecule biosynthetic process // inferred from electronic annotation              |
| 131.5069 84.73762       | 0.013 NM_025408         |              | <b>-1.52 Acer3</b>                | alkaline ceramidase 3                                                                                                                                               | 0006672 // ceramide metabolic process // inferred from electronic annotation                      |
| 1884.869 1213.266       | 0.034 XM_001478170///NM |              | <b>-1.52 Nae1///LOC10004739</b>   | similar to Amyloid beta precursor protein binding protein 1///NEDD8 activ                                                                                           | 0019941 // modification-dependent protein catabolic process // inferred from electronic annota    |
| 172.7651 111.0249       | 0.012 NM_194269         |              | <b>-1.52 Morn2</b>                | MORN repeat containing 2                                                                                                                                            |                                                                                                   |
| 1949.802 1261.678       | 0.017 NM_016778         |              | <b>-1.52 Bok</b>                  | BCL2-related ovarian killer protein                                                                                                                                 | 0006915 // apoptosis // inferred from electronic annotation///0006917 // induction of apoptosi    |
| 2497.827 1613.335       | 0.017 NM_029478         |              | <b>-1.52 Tmem49</b>               | transmembrane protein 49                                                                                                                                            | 0005783 // endoplasmic reticulum // inferred from electronic annotation///0033116 // ER-Golgi     |
| 83.85282 54.2442        | 0.020 NM_010839///NM_0  |              | <b>-1.52 Mtcp1</b>                | mature T-cell proliferation 1                                                                                                                                       | 0005739 // mitochondrion // inferred from electronic annotation///0005739 // mitochondrion /      |
| 642.4833 411.8186       | 0.020 NM_026794         |              | <b>-1.52 Deb1</b>                 | differentially expressed in B16F10 1                                                                                                                                |                                                                                                   |
| 953.4912 615.7377       | 0.007 NM_011851         |              | <b>-1.52 Nt5e</b>                 | 5' nucleotidase, ecto///5' nucleotidase, ecto (Nt5e), mRNA                                                                                                          | 0050728 // negative regulation of inflammatory response // inferred from mutant phenotype///      |
| 425.273 274.5216        | 0.021 NM_026959         |              | <b>-1.52 Stx18</b>                | synaptaxin 18                                                                                                                                                       | 0006810 // transport // inferred from electronic annotation///0016192 // vesicle-mediated tran    |
| 290.2039 187.0178       | 0.010 NM_175560///NM_1  |              | <b>-1.53 9130019022Rik///Zfp</b>  | zinc finger protein 747///RIKEN cDNA 9130019022 gene///RIKEN cDNA E4                                                                                                | 0006355 // regulation of transcription, DNA-dependent // inferred from electronic annotation//    |
| 41.79565 26.98269       | 0.002 NM_026734         |              | <b>-1.53 Tmem126b</b>             | transmembrane protein 126B                                                                                                                                          | 0016021 // integral to membrane // inferred from electronic annotation///0016020 // membrar       |
| 106.1479 68.0648        | 0.030 NM_001077713      |              | <b>-1.53 Acn9</b>                 | ACN9 homolog (S. cerevisiae)                                                                                                                                        | 0006094 // gluconeogenesis // inferred from sequence or structural similarity                     |
| 3946.493 2540.61        | 0.029 NM_013470         |              | <b>-1.53 Anxa3</b>                | annexin A3                                                                                                                                                          | 0019834 // phospholipase A2 inhibitor activity // inferred from electronic annotation///000554    |
| 33.78617 21.66928       | 0.045 NM_053253         |              | <b>-1.53 Zmynd10</b>              | zinc finger, MYND domain containing 10                                                                                                                              | 0046872 // metal ion binding // inferred from electronic annotation///0008270 // zinc ion bindi   |
| 1462.523 947.2139       | 0.012 NM_144897         |              | <b>-1.53 Apoa1bp</b>              | apolipoprotein A-1 binding protein                                                                                                                                  | 0005515 // protein binding // not recorded                                                        |
| 315.7233 202.5707       | 0.009 NM_172988         |              | <b>-1.53 Fbxl4</b>                | F-box and leucine-rich repeat protein 4                                                                                                                             | 0019941 // modification-dependent protein catabolic process // inferred from electronic annota    |
| 489.8318 317.1462       | 0.033 NM_001081233///XR |              | <b>-1.53 EG433923///Slc25a5//</b> | predicted gene, EG433923///predicted gene, EG667030///predicted gene,                                                                                               | 0006810 // transport // inferred from electronic annotation                                       |
| 2932.246 1880.48        | 0.048 XM_001474604///NM |              | <b>-1.53 Higd1a///LOC1000457</b>  | predicted gene, ENSMUSG00000044330///HIG1 domain family, member 1                                                                                                   | 0006950 // response to stress // inferred from electronic annotation                              |
| 921.4403 585.7483       | 0.020 NM_007530         |              | <b>-1.53 Bcap29</b>               | B-cell receptor-associated protein 29                                                                                                                               | 0006915 // apoptosis // inferred from electronic annotation///0006810 // transport // inferred f  |
| 535.4031 342.8602       | 0.037 NM_024174         |              | <b>-1.54 Mrps23</b>               | mitochondrial ribosomal protein S23                                                                                                                                 | 0003735 // structural constituent of ribosome // inferred from sequence or structural similarity  |
| 464.3846 303.42         | 0.040 NM_175116         |              | <b>-1.54 P2ry5</b>                | purinergic receptor P2Y, G-protein coupled, 5                                                                                                                       | 0007165 // signal transduction // inferred from electronic annotation///0007186 // G-protein cc   |
| 500.6631 318.0464       | 0.021 NM_001082532      |              | <b>-1.54 Pigyl</b>                | phosphatidylinositol glycan anchor biosynthesis, class Y-like                                                                                                       | 0006506 // GPI anchor biosynthetic process // inferred from electronic annotation                 |
| 13.11494 8.277576       | 0.030 XM_001480867///XM |              | <b>-1.54 Cd27</b>                 | CD27 antigen                                                                                                                                                        | 0048305 // immunoglobulin secretion // non-traceable author statement///0006915 // apoptos        |
| 988.4976 628.9379       | 0.047 NM_144916         |              | <b>-1.54 Tmem150</b>              | transmembrane protein 150                                                                                                                                           | 0016021 // integral to membrane // inferred from electronic annotation///0016021 // integral t    |
| 596.5231 377.851        | 0.028 NM_025301         |              | <b>-1.55 Mrpl17</b>               | mitochondrial ribosomal protein L17                                                                                                                                 | 0006412 // translation // not recorded///0006412 // translation // inferred from electronic ann   |
| 476.4685 299.4194       | 0.026 NM_023203         |              | <b>-1.55 Dctpp1</b>               | dCTP pyrophosphatase 1                                                                                                                                              | 0051289 // protein homotetramerization // inferred from direct assay                              |
| 91.72947 58.15486       | 0.013 NM_025469         |              | <b>-1.55 Clps</b>                 | colipase, pancreatic                                                                                                                                                | 0016042 // lipid catabolic process // inferred from electronic annotation///0007586 // digestion  |
| 713.002 453.6092        | 0.005 NM_025606         |              | <b>-1.55 Mrpl16</b>               | mitochondrial ribosomal protein L16                                                                                                                                 | 0006412 // translation // inferred from electronic annotation///0006412 // translation // inferre |
| 40.25615 25.29746       | 0.021 NM_013600///NM_0  |              | <b>-1.55 Msh5</b>                 | mutS homolog 5 (E. coli)                                                                                                                                            | 0007292 // female gamete generation // inferred from mutant phenotype///0006986 // respon         |
| 75.99167 48.63821       | 0.018 NM_013848         |              | <b>-1.55 Ermap</b>                | erythroblast membrane-associated protein                                                                                                                            | 0031410 // cytoplasmic vesicle // inferred from direct assay///0005886 // plasma membrane //      |
| 689.6768 432.4806       | 0.025 NM_139229         |              | <b>-1.55 Pdf///Cog8</b>           | peptide deformylase (mitochondrial)///component of oligomeric golgi cor                                                                                             | 0006810 // transport // inferred from electronic annotation///0015031 // protein transport // ir  |
| 38.46425 24.01132       | 0.036 NM_009250         |              | <b>-1.55 Serpin1</b>              | Serine (or cysteine) peptidase inhibitor, clade I, member 1, mRNA (cDNA clone MGC:6413 IMAGE:3588856)///serine (or cysteine) peptidase inhibitor, clade I, member 1 | 0008092 // cytoskeletal protein binding // inferred from electronic annotation///0005488 // bin   |
| 310.948 198.2547        | 0.022 XM_980440///NM_0  |              | <b>-1.56 Epb4.1I4b</b>            | erythrocyte protein band 4.1-like 4b                                                                                                                                | 0007264 // small GTPase mediated signal transduction // inferred from electronic annotation///    |
| 288.2301 181.93         | 0.029 NM_011227         |              | <b>-1.56 Rab20</b>                | RAB20, member RAS oncogene family                                                                                                                                   | 0006810 // transport // inferred from electronic annotation///0015031 // protein transport // ir  |
| 294.0204 184.8419       | 0.019 NM_001127191///NM |              | <b>-1.56 Snx16</b>                | sorting nexin 16                                                                                                                                                    | 0005739 // mitochondrion // inferred from electronic annotation///0030529 // ribonucleoprote      |
| 326.6604 204.8988       | 0.023 NM_178603         |              | <b>-1.56 Mrpl50</b>               | mitochondrial ribosomal protein L50                                                                                                                                 | 0016021 // integral to membrane // inferred from electronic annotation///0005739 // mitochor      |
| 1876.378 1180.146       | 0.015 NM_026618         |              | <b>-1.56 Ccdc56</b>               | coiled-coil domain containing 56                                                                                                                                    | 0017111 // nucleoside-triphosphatase activity // inferred from electronic annotation///0005524    |
| 424.6869 265.5952       | 0.047 NM_133823         |              | <b>-1.56 Mmaa</b>                 | methylmalonic aciduria (cobalamin deficiency) type A                                                                                                                | 0051028 // mRNA transport // inferred from electronic annotation///0065002 // intracellular pr    |
| 292.9338 184.0178       | 0.014 NM_027091         |              | <b>-1.56 Nup35</b>                | nucleoporin 35                                                                                                                                                      | 0046903 // secretion // inferred from direct assay///0045454 // cell redox homeostasis // infern  |
| 312.6984 197.4192       | 0.025 NM_133783         |              | <b>-1.56 Ptges2</b>               | prostaglandin E synthase 2                                                                                                                                          | 0043457 // regulation of cellular respiration // inferred from mutant phenotype                   |
| 1636.327 1027.339       | 0.047 NM_134007         |              | <b>-1.56 Cisd1</b>                | CDGSH iron sulfur domain 1                                                                                                                                          |                                                                                                   |
| 56.7785 36.335          | 0.035 NM_029610         |              | <b>-1.56 Lyrn1</b>                | LYR motif containing 1                                                                                                                                              |                                                                                                   |
| 681.6025 428.0858       | 0.005 NM_024227         |              | <b>-1.57 Mrpl28</b>               | mitochondrial ribosomal protein L28                                                                                                                                 | 0045449 // regulation of transcription // inferred from electronic annotation                     |
| 244.2457 153.2847       | 0.008 NM_001159612///NM |              | <b>-1.57 Lrrc57</b>               | leucine rich repeat containing 57                                                                                                                                   | 0005515 // protein binding // inferred from electronic annotation                                 |
| 2692.067 1692.505       | 0.034 NM_025403         |              | <b>-1.57 Nop10</b>                | NOP10 ribonucleoprotein homolog (yeast)                                                                                                                             | 0042254 // ribosome biogenesis // inferred from electronic annotation///0006364 // rRNA proc      |
| 296.6109 182.8616       | 0.045 NM_172575///NM_1  |              | <b>-1.57 Zfp277</b>               | zinc finger protein 277                                                                                                                                             | 0005515 // protein binding // inferred from electronic annotation///0008270 // zinc ion binding   |
| 132.542 83.09451        | 0.018 NM_029321         |              | <b>-1.57 Ttc32</b>                | tetratricopeptide repeat domain 32                                                                                                                                  | 0005488 // binding // inferred from electronic annotation                                         |

| [ICR, PBS]([ICR, SUL]) | p     | RefSeq Transcript ID | FC [PBS:SFN] | Gene Symbol                 | Gene Title                                                                                                                         | Gene Ontology Biological Process                                                                   |
|------------------------|-------|----------------------|--------------|-----------------------------|------------------------------------------------------------------------------------------------------------------------------------|----------------------------------------------------------------------------------------------------|
| 60.01769 37.55688      | 0.002 | NM_145146            | -1.58        | <b>Afm</b>                  | afamin                                                                                                                             | 0006810 // transport // inferred from electronic annotation                                        |
| 591.2401 365.0035      | 0.018 | NM_177910            | -1.58        | <b>Gmppb</b>                | GDP-mannose pyrophosphorylase B                                                                                                    | 0009058 // biosynthetic process // inferred from electronic annotation///0007157 // heterophil     |
| 640.9873 399.33        | 0.003 | NM_027296            | -1.59        | <b>Trnt1</b>                | tRNA nucleotidyl transferase, CCA-adding, 1                                                                                        | 0008033 // tRNA processing // inferred from electronic annotation///0006396 // RNA processing      |
| 327.7994 200.8331      | 0.026 | NM_026732            | -1.59        | <b>Mrpl14</b>               | mitochondrial ribosomal protein L14///Mitochondrial ribosomal protein L1                                                           | 0006412 // translation // inferred from electronic annotation                                      |
| 63.00163 38.51973      | 0.029 | NM_026161            | -1.59        | <b>C1qtnf4</b>              | C1q and tumor necrosis factor related protein 4, mRNA (cDNA clone IMAGE:3668760)///C1q and tumor necrosis factor related protein 4 | 0005739 // mitochondrion // inferred from electronic annotation///0005743 // mitochondrial in      |
| 1810.035 1128.829      | 0.022 | NM_018819            | -1.59        | <b>Brp44l</b>               | brain protein 44-like                                                                                                              | 0006412 // translation // inferred from electronic annotation///0006810 // transport // inferred   |
| 1139.32 703.316        | 0.014 | NM_025450            | -1.60        | <b>Mrps17</b>               | mitochondrial ribosomal protein S17                                                                                                | 0006546 // glycine catabolic process // inferred from electronic annotation                        |
| 1642.731 998.7895      | 0.050 | NM_026572            | -1.60        | <b>Gcsh</b>                 | glycine cleavage system protein H (aminomethyl carrier)                                                                            | 0005515 // protein binding // inferred from electronic annotation                                  |
| 109.1562 68.12119      | 0.017 | XM_908231///XM_85    | -1.60        | <b>Lrrc51</b>               | leucine rich repeat containing 51                                                                                                  |                                                                                                    |
| 87.10313 53.09328      | 0.029 | XR_032922///NM_02    | -1.60        | <b>Ppcs///EG667114</b>      | phosphopantothenoylcysteine synthetase///predicted gene, EG667114                                                                  |                                                                                                    |
| 1018.958 629.4298      | 0.023 | NM_026631            | -1.60        | <b>Nhp2</b>                 | NHP2 ribonucleoprotein homolog (yeast)                                                                                             | 0042254 // ribosome biogenesis // inferred from electronic annotation///0031118 // rRNA pseu       |
| 177.6615 108.6985      | 0.022 | NM_028836            | -1.60        | <b>Ctbs</b>                 | chitinase, di-N-acetyl-                                                                                                            | 0008152 // metabolic process // inferred from electronic annotation///0005975 // carbohydrate      |
| 860.6187 525.7906      | 0.006 | NM_146165            | -1.60        | <b>Jtv1</b>                 | JTV1 gene                                                                                                                          | 0006412 // translation // inferred from electronic annotation                                      |
| 3141.626 1913.345      | 0.018 | NM_023202            | -1.61        | <b>Ndufa7</b>               | NADH dehydrogenase (ubiquinone) 1 alpha subcomplex, 7 (B14.5a) (Ndufa7)                                                            | 0042773 // ATP synthesis coupled electron transport // inferred from electronic annotation///00    |
| 2050.234 1245.538      | 0.031 | NM_019745            | -1.61        | <b>Pdcd10</b>               | programmed cell death 10                                                                                                           | 0006915 // apoptosis // inferred from electronic annotation                                        |
| 408.1969 252.0951      | 0.006 | NM_001142681///NM    | -1.61        | <b>Chid1</b>                | chitinase domain containing 1                                                                                                      | 0005975 // carbohydrate metabolic process // inferred from electronic annotation///0006032 //      |
| 605.7777 366.1319      | 0.048 | NM_133679            | -1.62        | <b>Cryz1</b>                | crystallin, zeta (quinone reductase)-like 1                                                                                        | 0055114 // oxidation reduction // inferred from electronic annotation///0008152 // metabolic p     |
| 118.8187 71.68528      | 0.014 | NM_001039534         | -1.62        | <b>Pstk</b>                 | phosphoserine-tRNA kinase                                                                                                          | 0006412 // translation // inferred from electronic annotation///0006355 // regulation of transcr   |
| 53.58475 33.25836      | 0.038 | NM_007755            | -1.62        | <b>Cpeb1</b>                | cytoplasmic polyadenylation element binding protein 1                                                                              | 0007130 // synaptonemal complex assembly // inferred from mutant phenotype///0006417 // r          |
| 737.2197 437.0958      | 0.043 | NM_009069            | -1.62        | <b>Rit1</b>                 | Ras-like without CAAX 1                                                                                                            | 0007264 // small GTPase mediated signal transduction // inferred from electronic annotation        |
| 373.2211 226.2109      | 0.013 | NM_026448            | -1.63        | <b>Klhl7</b>                | kelch-like 7 (Drosophila)                                                                                                          | 0005515 // protein binding // inferred from electronic annotation                                  |
| 1017.697 614.6252      | 0.013 | NM_175277            | -1.63        | <b>Bola3</b>                | bolA-like 3 (E. coli)                                                                                                              |                                                                                                    |
| 576.665 347.6554       | 0.015 | NM_026452            | -1.63        | <b>Coq9</b>                 | coenzyme Q9 homolog (yeast)                                                                                                        | 0006744 // ubiquinone biosynthetic process // inferred from electronic annotation                  |
| 218.0706 130.0511      | 0.013 | NM_029629            | -1.64        | <b>Fahd2a</b>               | fumarylacetoacetate hydrolase domain containing 2A                                                                                 | 0008152 // metabolic process // inferred from electronic annotation                                |
| 1010.362 599.4307      | 0.033 | NM_025798            | -1.64        | <b>Hint3</b>                | histidine triad nucleotide binding protein 3                                                                                       | 0016787 // hydrolase activity // inferred from electronic annotation///0003824 // catalytic activ  |
| 7552.051 4567.932      | 0.004 | NM_028618///NM_1     | -1.64        | <b>Dmkn</b>                 | dermokine                                                                                                                          | 0030154 // cell differentiation // inferred from electronic annotation                             |
| 446.1181 266.0846      | 0.029 | NM_026526            | -1.64        | <b>N6amt2</b>               | N-6 adenine-specific DNA methyltransferase 2 (putative)                                                                            | 0032259 // methylation // inferred from electronic annotation                                      |
| 4272.006 2531.228      | 0.044 | NM_025983            | -1.64        | <b>Atp5e</b>                | ATP synthase, H+ transporting, mitochondrial F1 complex, epsilon subunit                                                           | 0015992 // proton transport // inferred from electronic annotation///0015986 // ATP synthesis      |
| 49.65157 29.80688      | 0.023 | NM_144943            | -1.64        | <b>Cd207</b>                | CD207 antigen                                                                                                                      | 0005529 // sugar binding // inferred from electronic annotation///0005488 // binding // inferre    |
| 126.8392 75.34242      | 0.025 | XM_001473278///NM    | -1.64        | <b>LOC100044896///Scdp</b>  | saccharopine dehydrogenase (putative)///similar to Saccharopine dehydro                                                            | 0055114 // oxidation reduction // inferred from electronic annotation///0008152 // metabolic p     |
| 102.178 61.38092       | 0.008 | NM_009544            | -1.65        | <b>Zfp105</b>               | zinc finger protein 105                                                                                                            | 0008270 // zinc ion binding // inferred from electronic annotation///0003676 // nucleic acid bin   |
| 644.2593 377.8097      | 0.030 | NM_001033297         | -1.65        | <b>Gm561</b>                | gene model 561, (NCBI)                                                                                                             |                                                                                                    |
| 654.8452 384.9943      | 0.050 | NM_027925            | -1.65        | <b>Trnau1ap</b>             | tRNA selenocysteine 1 associated protein 1                                                                                         | 0006412 // translation // inferred from electronic annotation///0001514 // selenocysteine incor    |
| 560.3851 332.4734      | 0.031 | NM_207625///NM_0     | -1.66        | <b>Acs14</b>                | acyl-CoA synthetase long-chain family member 4                                                                                     | 0008152 // metabolic process // inferred from electronic annotation///0019217 // regulation of     |
| 43.55812 25.82665      | 0.001 | XR_002074///XR_033   | -1.66        | <b>LOC674137///LOC6766</b>  | similar to RT1 class I histocompatibility antigen, AA alpha chain precursor///                                                     | 0002474 // antigen processing and presentation of peptide antigen via MHC class I // inferred fr   |
| 362.2102 211.3004      | 0.014 | NM_001012400         | -1.67        | <b>AU022252</b>             | expressed sequence AU022252                                                                                                        |                                                                                                    |
| 140.0045 82.49772      | 0.034 | NM_001080820///NM    | -1.67        | <b>Cass4</b>                | Cas scaffolding protein family member 4                                                                                            | 0007155 // cell adhesion // inferred from electronic annotation                                    |
| 305.6148 178.4218      | 0.024 | NM_001004190         | -1.67        | <b>Zfp560</b>               | zinc finger protein 560                                                                                                            | 0006355 // regulation of transcription, DNA-dependent // inferred from electronic annotation//     |
| 1170.233 669.1027      | 0.045 | NM_001031808         | -1.67        | <b>Mrpl41</b>               | mitochondrial ribosomal protein L41                                                                                                | 0006915 // apoptosis // inferred from electronic annotation///0007049 // cell cycle // inferred f  |
| 641.6351 378.3987      | 0.006 | NM_026392///NM_0     | -1.68        | <b>Tmem70</b>               | transmembrane protein 70                                                                                                           | 0033615 // mitochondrial proton-transporting ATP synthase complex assembly // inferred from        |
| 765.8442 447.9453      | 0.043 | NM_018820            | -1.68        | <b>Sertad1</b>              | SERTA domain containing 1                                                                                                          | 0030308 // negative regulation of cell growth // not recorded///0006355 // regulation of transcr   |
| 2987.745 1744.462      | 0.009 | NM_012021            | -1.68        | <b>Prdx5</b>                | peroxiredoxin 5                                                                                                                    | 0055114 // oxidation reduction // inferred from electronic annotation///0045454 // cell redox h    |
| 328.4195 194.028       | 0.012 | NM_001130149///NM    | -1.68        | <b>LOC100045148///Rnas</b>  | ribonuclease III, nuclear///similar to ribonuclease III, nuclear                                                                   | 0006396 // RNA processing // inferred from electronic annotation                                   |
| 223.5362 127.8515      | 0.036 | NR_003946///NM_02    | -1.68        | <b>Hyi</b>                  | hydroxyypyruvate isomerase homolog (E. coli)                                                                                       | 0008903 // hydroxyypyruvate isomerase activity // inferred from electronic annotation///001685     |
| 145.3545 86.19986      | 0.033 | NM_022986            | -1.69        | <b>Irak1bp1</b>             | interleukin-1 receptor-associated kinase 1 binding protein 1                                                                       | 0007249 // I-kappaB kinase/NF-kappaB cascade // inferred from direct assay///0006355 // regul      |
| 138.8898 80.59638      | 0.018 | NM_001082412///NM    | -1.69        | <b>Mcart6</b>               | mitochondrial carrier triple repeat 6                                                                                              | 0006810 // transport // inferred from electronic annotation                                        |
| 477.323 278.0555       | 0.007 | NM_019752            | -1.70        | <b>Htra2</b>                | Htra serine peptidase 2                                                                                                            | 0006915 // apoptosis // inferred from electronic annotation///0008629 // induction of apoptosi     |
| 237.1729 136.5268      | 0.027 | XM_001473278///NM    | -1.70        | <b>LOC100044896///Scdp</b>  | saccharopine dehydrogenase (putative)///similar to Saccharopine dehydro                                                            | 0055114 // oxidation reduction // inferred from electronic annotation///0008152 // metabolic p     |
| 158.613 91.81495       | 0.009 | NM_029612            | -1.70        | <b>Slamf9</b>               | SLAM family member 9                                                                                                               | 0016021 // integral to membrane // inferred from electronic annotation///0016020 // membrar        |
| 23.96309 13.79724      | 0.041 | NM_001077353///NM    | -1.70        | <b>Gsta3</b>                | glutathione S-transferase, alpha 3                                                                                                 | 0008152 // metabolic process // inferred from electronic annotation                                |
| 455.092 262.7985       | 0.002 | NM_025554            | -1.71        | <b>Polr2e</b>               | polymerase (RNA) II (DNA directed) polypeptide E                                                                                   | 0006350 // transcription // inferred from electronic annotation                                    |
| 497.4266 284.8073      | 0.001 | NR_003518///XR_035   | -1.72        | <b>D030013116Rik///Pisd</b> | phosphatidylserine decarboxylase, pseudogene 1///RIKEN cDNA D0300131                                                               | 0008654 // phospholipid biosynthetic process // inferred from electronic annotation                |
| 320.0594 180.3527      | 0.026 | NM_172254///NM_0     | -1.72        | <b>Dph3</b>                 | DPH3 homolog (KT11, S. cerevisiae)                                                                                                 | 0051099 // positive regulation of binding // inferred from sequence or structural similarity///000 |
| 36.50731 20.76711      | 0.038 | NM_134160            | -1.72        | <b>Mcoln3</b>               | mucolipin 3                                                                                                                        | 0006811 // ion transport // inferred from electronic annotation///0006810 // transport // infer    |
| 1482.056 832.7785      | 0.025 | NM_145517            | -1.72        | <b>Ormdl1</b>               | ORM1-like 1 (S. cerevisiae)                                                                                                        | 0006508 // proteolysis // inferred from electronic annotation                                      |
| 758.034 439.0158       | 0.039 | NM_138721            | -1.73        | <b>Lsm10</b>                | U7 snRNP-specific Sm-like protein LSM10                                                                                            | 0006398 // histone mRNA 3'-end processing // traceable author statement///0008380 // RNA sp        |
| 637.9747 361.2487      | 0.001 | NR_003518///XR_035   | -1.74        | <b>D030013116Rik///Pisd</b> | phosphatidylserine decarboxylase, pseudogene 1///RIKEN cDNA D0300131                                                               | 0008654 // phospholipid biosynthetic process // inferred from electronic annotation                |
| 341.7427 194.705       | 0.003 | NM_029985            | -1.74        | <b>Lrrc42</b>               | leucine rich repeat containing 42                                                                                                  |                                                                                                    |
| 1848.543 1059.303      | 0.018 | XM_001481167///XN    | -1.74        | <b>Tmem181///Dynlt1d//</b>  | transmembrane protein 181///dynein light chain Tctex-type 1D///dynein li                                                           | 0007017 // microtubule-based process // inferred from direct assay                                 |
| 219.636 121.295        | 0.032 | NM_032003            | -1.74        | <b>Enpp5</b>                | ectonucleotide pyrophosphatase/phosphodiesterase 5                                                                                 | 0009166 // nucleotide catabolic process // not recorded///0008152 // metabolic process // infer    |



| [ICR, PBS]([ICR, SUL])p | RefSeq Transcript ID     | FC [PBS:SFN] | Gene Symbol                 | Gene Title                                                                   | Gene Ontology Biological Process                                                                    |
|-------------------------|--------------------------|--------------|-----------------------------|------------------------------------------------------------------------------|-----------------------------------------------------------------------------------------------------|
| 1129.348 644.199        | 0.006 NM_053119          | -1.74        | <b>Echs1</b>                | enoyl Coenzyme A hydratase, short chain, 1, mitochondrial                    | 0008152 // metabolic process // inferred from electronic annotation///0006629 // lipid metabo       |
| 2764.42 1578.652        | 0.018 XM_001481167///XM  | -1.75        | <b>Dynl1d1///Dynl11///E</b> | dynein light chain Tctex-type 1D///dynein light chain Tctex-type 1///predic  | 0007017 // microtubule-based process // inferred from direct assay                                  |
| 20.48614 11.37225       | 0.015 NM_173422          | -1.75        | <b>Colec10</b>              | collectin sub-family member 10                                               | 0009790 // embryonic development // non-traceable author statement///0006952 // defense re          |
| 392.2964 216.2384       | 0.032 NM_011765///NM_0   | -1.75        | <b>BC018101///Zfp97</b>     | zinc finger protein 97///cDNA sequence BC018101                              | 0006355 // regulation of transcription, DNA-dependent // inferred from electronic annotation//      |
| 257.9928 146.3981       | 0.040 NM_023196///NM_1   | -1.76        | <b>Pla2g12a</b>             | phospholipase A2, group XIIA                                                 | 0006644 // phospholipid metabolic process // inferred from electronic annotation///0016042 //       |
| 85.22612 48.56184       | 0.014 NM_027208          | -1.76        | <b>Bdh2</b>                 | 3-hydroxybutyrate dehydrogenase, type 2                                      | 0055114 // oxidation reduction // inferred from electronic annotation///0008152 // metabolic p      |
| 100.7416 55.61209       | 0.034 NM_025476          | -1.76        | <b>Fam82b</b>               | family with sequence similarity 82, member B                                 | 0005488 // binding // inferred from electronic annotation                                           |
| 684.1805 374.7329       | 0.020 NM_016763          | -1.77        | <b>Hsd17b10</b>             | hydroxysteroid (17-beta) dehydrogenase 10                                    | 0055114 // oxidation reduction // inferred from electronic annotation///0008152 // metabolic p      |
| 75.45448 41.3073        | 0.031 NM_008281///NM_0   | -1.77        | <b>Hpn</b>                  | hepsin                                                                       | 0016049 // cell growth // inferred from electronic annotation///0006508 // proteolysis // inferri   |
| 312.5625 175.3697       | 0.004 NM_133768          | -1.78        | <b>Asl</b>                  | argininosuccinate lyase                                                      | 0000053 // argininosuccinate metabolic process // inferred from electronic annotation///00196       |
| 668.3716 362.148        | 0.036 NM_008403          | -1.78        | <b>Itgb1bp1</b>             | integrin beta 1 binding protein 1                                            | 0030155 // regulation of cell adhesion // not recorded///0007160 // cell-matrix adhesion // infe    |
| 219.8164 119.9206       | 0.018 NM_027175          | -1.78        | <b>Ndufaf1</b>              | NADH dehydrogenase (ubiquinone) 1 alpha subcomplex, assembly factor 1        | 0008137 // NADH dehydrogenase (ubiquinone) activity // inferred from electronic annotation          |
| 311.9056 167.5919       | 0.030 NM_026816          | -1.78        | <b>Gtf2f2</b>               | general transcription factor IIF, polypeptide 2                              | 0045944 // positive regulation of transcription from RNA polymerase II promoter // inferred fro     |
| 153.3364 84.44883       | 0.011 NM_010210          | -1.78        | <b>Fhit</b>                 | fragile histidine triad gene                                                 | 0009117 // nucleotide metabolic process // traceable author statement///0006260 // DNA repli        |
| 123.403 69.23351        | 0.050 NM_182783          | -1.80        | <b>Fam167b</b>              | family with sequence similarity 167, member B                                |                                                                                                     |
| 130.9017 70.01032       | 0.023 NM_016746///NM_0   | -1.80        | <b>Ccnc</b>                 | cyclin C                                                                     | 0006355 // regulation of transcription, DNA-dependent // inferred from electronic annotation//      |
| 181.0848 96.50521       | 0.029 NM_026908          | -1.80        | <b>Cab39l</b>               | Calcium binding protein 39-like, mRNA (cDNA clone MGC:27972 IMAGE:35         | 0005488 // binding // inferred from electronic annotation                                           |
| 143.07 76.97679         | 0.029 NM_008521          | -1.80        | <b>Ltc4s</b>                | leukotriene C4 synthase                                                      | 0006691 // leukotriene metabolic process // inferred from electronic annotation///0006691 // l      |
| 57.41704 31.49134       | 0.016 NM_013542          | -1.81        | <b>Gzmb</b>                 | granzyme B                                                                   | 0006915 // apoptosis // inferred from electronic annotation///0019835 // cytolysis // inferred fr   |
| 922.3467 501.9294       | 0.000 NM_008655          | -1.81        | <b>Gadd45b</b>              | Growth arrest and DNA-damage-inducible 45 beta, mRNA (cDNA clone MG          | 0051726 // regulation of cell cycle // inferred from direct assay///0006915 // apoptosis // inferri |
| 342.9352 184.2806       | 0.005 NM_023175          | -1.82        | <b>Nit2</b>                 | nitrilase family, member 2                                                   | 0006807 // nitrogen compound metabolic process // inferred from electronic annotation               |
| 465.5807 248.5234       | 0.017 NM_025351          | -1.82        | <b>Chcd6</b>                | coiled-coil-helix-coiled-coil-helix domain containing 6                      |                                                                                                     |
| 2220.494 1160.979       | 0.037 NM_028260          | -1.82        | <b>Immp1l</b>               | IMP1 inner mitochondrial membrane peptidase-like (S. cerevisiae)             | 0008236 // serine-type peptidase activity // inferred from electronic annotation///0016787 // h     |
| 2157.829 1148.805       | 0.029 NM_026752          | -1.82        | <b>Zfyve21</b>              | zinc finger, FYVE domain containing 21                                       | 0046872 // metal ion binding // inferred from electronic annotation///0008270 // zinc ion bindi     |
| 60.59875 32.02939       | 0.024 NM_001038654///NM  | -1.83        | <b>Slc16a3</b>              | solute carrier family 16 (monocarboxylic acid transporters), member 3        | 0015711 // organic anion transport // inferred from electronic annotation///0006810 // transpo      |
| 65.25829 35.06831       | 0.001 NM_019686          | -1.84        | <b>Cib2</b>                 | calcium and integrin binding family member 2                                 | 0007229 // integrin-mediated signaling pathway // inferred from electronic annotation               |
| 101.9652 54.32904       | 0.015 NM_023900          | -1.84        | <b>Plekhd1</b>              | pleckstrin homology domain containing, family J member 1                     | 0005515 // protein binding // inferred from electronic annotation                                   |
| 348.9084 184.2331       | 0.010 NM_026981          | -1.84        | <b>Dtw1</b>                 | DTW domain containing 1                                                      |                                                                                                     |
| 20.37019 10.75001       | 0.005 NM_013930          | -1.86        | <b>Aass</b>                 | aminoadipate-semialdehyde synthase                                           | 0055114 // oxidation reduction // inferred from electronic annotation///0008152 // metabolic p      |
| 418.7346 221.8955       | 0.000 NM_028053          | -1.87        | <b>Tmem38b</b>              | transmembrane protein 38B///Transmembrane protein 38B (Tmem38b), n           | 0006813 // potassium ion transport // inferred from electronic annotation///0006811 // ion tra      |
| 313.7644 164.9038       | 0.025 NM_026465          | -1.88        | <b>Ncrna00117</b>           | non-protein coding RNA 117                                                   |                                                                                                     |
| 775.4144 398.2403       | 0.023 NM_025654          | -1.89        | <b>Rdm1</b>                 | RAD52 motif 1                                                                | 0003677 // DNA binding // inferred from electronic annotation///0003723 // RNA binding // infe      |
| 280.8091 144.5645       | 0.007 NM_016918          | -1.90        | <b>Nudt5</b>                | nudix (nucleoside diphosphate linked moiety X)-type motif 5                  | 0006139 // nucleobase, nucleoside, nucleotide and nucleic acid metabolic process // inferred fr     |
| 195.6902 102.7243       | 0.036 NM_019487          | -1.91        | <b>Hebp2</b>                | heme binding protein 2                                                       | 0005737 // cytoplasm // inferred from direct assay///0005737 // cytoplasm // inferred from ele      |
| 95.06571 48.2388        | 0.024 NM_028051///NM_0   | -1.91        | <b>Slc39a5</b>              | solute carrier family 39 (metal ion transporter), member 5                   | 0006829 // zinc ion transport // traceable author statement///0030001 // metal ion transport //     |
| 92.20453 46.38475       | 0.019 NM_013754          | -1.91        | <b>Ins16</b>                | insulin-like 6                                                               | 0005179 // hormone activity // inferred from electronic annotation                                  |
| 77.01664 39.70833       | 0.019 NM_011196          | -1.92        | <b>Ptger3</b>               | prostaglandin E receptor 3 (subtype EP3)                                     | 0015701 // bicarbonate transport // inferred from mutant phenotype///0007165 // signal trans        |
| 58.40881 28.69086       | 0.037 NM_011760          | -1.94        | <b>Zfp54</b>                | zinc finger protein 54                                                       | 0006355 // regulation of transcription, DNA-dependent // inferred from electronic annotation//      |
| 134.536 64.73121        | 0.033 XM_194572///NM_0   | -1.96        | <b>Etoh1</b>                | ethanol induced 1                                                            | 0006355 // regulation of transcription, DNA-dependent // inferred from electronic annotation//      |
| 1034.297 528.4978       | 0.046 NM_008536          | -1.96        | <b>Tm4sf1</b>               | transmembrane 4 superfamily member 1                                         | 0005887 // integral to plasma membrane // inferred from electronic annotation///0016021 // in       |
| 611.846 311.8536        | 0.033 NM_009222          | -1.97        | <b>Snap23</b>               | synaptosomal-associated protein 23                                           | 0006810 // transport // inferred from electronic annotation///0015031 // protein transport // ir    |
| 106.3862 50.90015       | 0.025 NM_029942          | -2.00        | <b>Prelid2</b>              | PRELI domain containing 2                                                    |                                                                                                     |
| 222.2006 105.0448       | 0.035 NM_025429          | -2.03        | <b>Serpinb1a</b>            | serine (or cysteine) peptidase inhibitor, clade B, member 1a                 | 0042176 // regulation of protein catabolic process // inferred from physical interaction            |
| 75.25092 36.97152       | 0.027 NM_009014          | -2.04        | <b>Rad51l1</b>              | RAD51-like 1 (S. cerevisiae)                                                 | 0006974 // response to DNA damage stimulus // inferred from electronic annotation///0006310         |
| 657.9487 321.7397       | 0.007 NM_026347          | -2.06        | <b>Iah1</b>                 | isoamyl acetate-hydrolyzing esterase 1 homolog (S. cerevisiae)               | 0016042 // lipid catabolic process // inferred from electronic annotation///0006629 // lipid met    |
| 217.3756 99.474         | 0.021 NM_010893          | -2.08        | <b>Neu1</b>                 | neuraminidase 1                                                              | 0008152 // metabolic process // inferred from electronic annotation                                 |
| 45.13906 21.32257       | 0.002 XR_002074///XR_033 | -2.10        | <b>LOC674137///LOC676</b>   | similar to RT1 class I histocompatibility antigen, AA alpha chain precursor/ | 0002474 // antigen processing and presentation of peptide antigen via MHC class I // inferred fr    |
| 433.5234 191.1205       | 0.044 NM_175095          | -2.12        | <b>Comm2</b>                | COMM domain containing 2                                                     | 0005515 // protein binding // inferred from electronic annotation                                   |
| 119.4844 54.20826       | 0.024 NM_023523          | -2.13        | <b>Pecr</b>                 | peroxisomal trans-2-enoyl-CoA reductase                                      | 0055114 // oxidation reduction // inferred from electronic annotation///0008152 // metabolic p      |
| 25.80614 11.38525       | 0.032 NM_010391          | -2.14        | <b>H2-Q10</b>               | histocompatibility 2, Q region locus 10                                      | 0002474 // antigen processing and presentation of peptide antigen via MHC class I // inferred fr    |
| 899.5041 416.2256       | 0.022 NM_025273          | -2.18        | <b>Pcbd1</b>                | pterin 4 alpha carbinolamine dehydratase/dimerization cofactor of hepato     | 0043496 // regulation of protein homodimerization activity // inferred from direct assay///0051     |
| 58.36729 26.84178       | 0.011 NM_018746///NM_0   | -2.19        | <b>Itih4</b>                | inter alpha-trypsin inhibitor, heavy chain 4                                 | 0030212 // hyaluronan metabolic process // inferred from electronic annotation                      |
| 509.9585 221.1738       | 0.047 NM_007994          | -2.27        | <b>Fbp2</b>                 | fructose biphosphatase 2                                                     | 0005975 // carbohydrate metabolic process // inferred from electronic annotation///0006094 //       |
| 175.9481 76.97847       | 0.030 NM_029556          | -2.29        | <b>Clybl</b>                | citrate lyase beta like                                                      | 0006725 // cellular aromatic compound metabolic process // inferred from electronic annotatio       |
| 45.35812 17.94804       | 0.050 NM_020049          | -2.35        | <b>Slc6a14</b>              | solute carrier family 6 (neurotransmitter transporter), member 14            | 0006865 // amino acid transport // inferred from electronic annotation///0006836 // neurotran       |
| 147.2613 61.84474       | 0.037 NM_009437          | -2.36        | <b>Tst</b>                  | thiosulfate sulfurtransferase, mitochondrial                                 | 0008272 // sulfate transport // inferred from electronic annotation                                 |
| 887.5344 359.9771       | 0.018 NM_027299          | -2.37        | <b>Degs2</b>                | degenerative spermatocyte homolog 2 (Drosophila), lipid desaturase           | 0055114 // oxidation reduction // inferred from electronic annotation///0006629 // lipid metab      |
| 283.5951 114.1662       | 0.012 NM_033612          | -2.38        | <b>cela1</b>                | chymotrypsin-like elastase family, member 1                                  | 0006508 // proteolysis // inferred from electronic annotation                                       |
| 295.7775 128.9315       | 0.047 NM_030004          | -2.40        | <b>Cryl1</b>                | crystallin, lambda b1                                                        | 0055114 // oxidation reduction // inferred from electronic annotation///0008152 // metabolic p      |
| 98.13062 39.13979       | 0.048 NM_031198          | -2.47        | <b>Tcfec</b>                | transcription factor EC                                                      | 0006355 // regulation of transcription, DNA-dependent // inferred from electronic annotation//      |

| [ICR, PBS]([ICR, SUL])p | RefSeq Transcript ID    | FC [PBS:SFN] | Gene Symbol                 | Gene Title                                                                    | Gene Ontology Biological Process                                                                   |
|-------------------------|-------------------------|--------------|-----------------------------|-------------------------------------------------------------------------------|----------------------------------------------------------------------------------------------------|
| 959.7819 372.2889       | 0.026 NM_001102468///NM | -2.48        | <i>Calml4</i>               | calmodulin-like 4                                                             | 0005509 // calcium ion binding // inferred from electronic annotation                              |
| 82.68385 30.72629       | 0.015 NM_008964         | -2.54        | <i>Ptger2</i>               | prostaglandin E receptor 2 (subtype EP2)                                      | 0042127 // regulation of cell proliferation // inferred from genetic interaction///0007165 // sign |
| 237.3564 96.25427       | 0.028 NM_025393         | -2.58        | <i>S100a14</i>              | S100 calcium binding protein A14                                              | 0005509 // calcium ion binding // inferred from electronic annotation                              |
| 297.5703 110.8488       | 0.030 NM_183136         | -2.68        | <i>Spink8</i>               | serine peptidase inhibitor, Kazal type 8                                      | 0004866 // endopeptidase inhibitor activity // inferred from electronic annotation///0004867 //    |
| 159.78 55.80623         | 0.039 NM_007443         | -2.72        | <i>Ambp</i>                 | alpha 1 microglobulin/bikunin                                                 | 0018298 // protein-chromophore linkage // inferred from electronic annotation///0006810 // tr      |
| 102.0721 34.39528       | 0.035 NM_030601///NM_0  | -2.75        | <i>Clca1///Clca2</i>        | chloride channel calcium activated 1///chloride channel calcium activated     | 0006915 // apoptosis // inferred from direct assay///0006821 // chloride transport // inferred fr  |
| 236.1969 86.81435       | 0.046 NM_007428         | -2.76        | <i>Agt</i>                  | angiotensinogen (serpin peptidase inhibitor, clade A, member 8)               | 0001999 // renal response to blood flow during renin-angiotensin regulation of systemic arterial   |
| 190.6407 62.39538       | 0.045 NM_026680         | -2.86        | <i>Golt1a</i>               | golgi transport 1 homolog A (S. cerevisiae)                                   | 0006810 // transport // inferred from electronic annotation///0016192 // vesicle-mediated tran     |
| 277.9861 94.95822       | 0.014 NM_054098         | -2.88        | <i>Steap4</i>               | STEAP family member 4                                                         | 0045444 // fat cell differentiation // inferred from expression pattern///0055114 // oxidation re  |
| 80.82946 25.35468       | 0.025 NM_030703         | -2.92        | <i>Cpn1</i>                 | carboxypeptidase N, polypeptide 1                                             | 0006508 // proteolysis // inferred from electronic annotation                                      |
| 1170.563 416.8855       | 0.014 NM_010373         | -2.95        | <i>Gzme</i>                 | granzyme E                                                                    | 0019835 // cytolysis // inferred from electronic annotation///0006508 // proteolysis // inferred   |
| 135.4999 48.5519        | 0.030 NM_177372         | -2.99        | <i>Dna2</i>                 | DNA replication helicase 2 homolog (yeast)                                    | 0006260 // DNA replication // inferred from electronic annotation                                  |
| 1166.445 422.6965       | 0.041 NM_133900         | -3.02        | <i>Psph</i>                 | phosphoserine phosphatase                                                     | 0008152 // metabolic process // inferred from electronic annotation///0008652 // amino acid b      |
| 124.829 43.1871         | 0.025 NM_010371         | -3.05        | <i>Gzmc</i>                 | granzyme C                                                                    | 0019835 // cytolysis // inferred from electronic annotation///0006508 // proteolysis // inferred   |
| 235.968 70.08734        | 0.028 NM_030601///NM_0  | -3.14        | <i>Clca1///Clca2</i>        | chloride channel calcium activated 1///chloride channel calcium activated     | 0006915 // apoptosis // inferred from direct assay///0006821 // chloride transport // inferred fr  |
| 468.7179 147.8166       | 0.018 NM_008969         | -3.15        | <i>Ptgs1</i>                | prostaglandin-endoperoxide synthase 1                                         | 0042127 // regulation of cell proliferation // inferred from genetic interaction///0006979 // resq |
| 624.2955 165.2511       | 0.045 NM_009393         | -3.47        | <i>Tnnc1</i>                | troponin C, cardiac/slow skeletal                                             | 0060048 // cardiac muscle contraction // inferred from electronic annotation///0055010 // vent     |
| 510.1474 144.6265       | 0.008 NM_010374         | -3.59        | <i>Gzmf</i>                 | granzyme F                                                                    | 0019835 // cytolysis // inferred from electronic annotation///0006508 // proteolysis // inferred   |
| 3432.359 973.1182       | 0.039 NM_008557         | -3.74        | <i>Fxyd3</i>                | FX1D domain-containing ion transport regulator 3                              | 0006811 // ion transport // inferred from electronic annotation///0006810 // transport // infer    |
| 76.90684 18.04546       | 0.048 NM_031197         | -3.74        | <i>Slc2a2</i>               | solute carrier family 2 (facilitated glucose transporter), member 2           | 0015758 // glucose transport // inferred from electronic annotation///0055085 // transmembra       |
| 155.0606 44.29022       | 0.040 XM_001475511///NM | -3.77        | <i>Mosc1///LOC1000459</i>   | MOCO sulphurase C-terminal domain containing 1///similar to MOSC dom          | 0055114 // oxidation reduction // inferred from electronic annotation                              |
| 65.23593 15.47273       | 0.015 NM_009996         | -3.79        | <i>Cyp24a1</i>              | cytochrome P450, family 24, subfamily a, polypeptide 1                        | 0042359 // vitamin D metabolic process // inferred from mutant phenotype///0055114 // oxida        |
| 867.3882 233.5265       | 0.004 NM_008341         | -3.86        | <i>Igfbp1</i>               | insulin-like growth factor binding protein 1                                  | 0001558 // regulation of cell growth // inferred from electronic annotation                        |
| 769.3154 204.8184       | 0.012 NM_010375         | -3.89        | <i>Gzmg</i>                 | granzyme G                                                                    | 0019835 // cytolysis // inferred from electronic annotation///0006508 // proteolysis // inferred   |
| 541.9498 110.5021       | 0.045 NM_010361         | -3.94        | <i>Gstt2</i>                | glutathione S-transferase, theta 2                                            | 0006749 // glutathione metabolic process // not recorded///0006749 // glutathione metabolic p      |
| 1153.052 308.8997       | 0.014 NM_010372         | -4.11        | <i>Gzmd</i>                 | granzyme D                                                                    | 0019835 // cytolysis // inferred from electronic annotation///0006508 // proteolysis // inferred   |
| 125.4495 26.23067       | 0.006 NM_008185         | -4.43        | <i>Gstt1</i>                | glutathione S-transferase, theta 1                                            | 0006749 // glutathione metabolic process // inferred from direct assay                             |
| 135.9316 18.1094        | 0.047 NM_019395         | -5.20        | <i>Fbp1</i>                 | fructose biphosphatase 1                                                      | 0005975 // carbohydrate metabolic process // inferred from electronic annotation///0006094 //      |
| 289.3531 43.62996       | 0.049 NM_019545         | -5.37        | <i>Hao3</i>                 | hydroxyacid oxidase (glycolate oxidase) 3                                     | 0055114 // oxidation reduction // inferred from electronic annotation///0008152 // metabolic p     |
| 201.1406 24.84246       | 0.000 NM_010701         | -7.84        | <i>Lect1</i>                | leukocyte cell derived chemotaxin 1                                           | 0007275 // multicellular organismal development // inferred from electronic annotation///0045      |
| 475.6654 25.90099       | 0.030 NM_025658         | -13.01       | <i>Ms4a4d</i>               | membrane-spanning 4-domains, subfamily A, member 4D                           | 0007165 // signal transduction // inferred from electronic annotation                              |
| 498.221 31.61247        | 0.000 XR_032349///NM_01 | -16.14       | <i>H2-L///LOC636948///H</i> | histocompatibility 2, D region locus 1///similar to H-2 class I histocompatib | 0051289 // protein homotetramerization // inferred from direct assay///0006952 // defense res      |
| 2475.117 17.70803       | 0.001 NM_021475         | -109.27      | <i>Adamdec1</i>             | ADAM-like, decysin 1                                                          | 0006508 // proteolysis // inferred from electronic annotation                                      |

Table S6. Prenatal sulforaphane-modulated genes in *Nrf2*<sup>-/-</sup> placenta (T Test unpaired p-value P <= 0.05 )

>=1.5-fold 367 genes

RIKEN cDNA and predicted genes excluded. Fold Change (FC): Blue (-) - fold lower in SFN than PBS, Red - fold higher in SFN than PBS.

Genes altered by SFN in common in *Nrf2*-WT and -KO placenta.

| [Nrf2-KO, PBS]([Nrf2-KO, SFN] p | RefSeq Transcript ID | FC PBS:SFN                | Gene Symbol                          | Gene Title                                                                                                    | Gene Ontology                                                                                      |
|---------------------------------|----------------------|---------------------------|--------------------------------------|---------------------------------------------------------------------------------------------------------------|----------------------------------------------------------------------------------------------------|
| 29.654598                       | 139.6766             | 0.002 NM_010701///XM_0065 | <b>4.71 Lct1</b>                     | leukocyte cell derived chemotaxin 1                                                                           | 0001886 // endothelial cell morphogenesis // inferred from direct assay///0001937 // negative re   |
| 100.55591                       | 290.45444            | 0.001 NM_001081212        | <b>2.89 Irs2</b>                     | insulin receptor substrate 2                                                                                  | 0002053 // positive regulation of mesenchymal cell proliferation // inferred from genetic interact |
| 45.319675                       | 106.36528            | 0.003 NM_008634///XM_0065 | <b>2.35 Map1b</b>                    | microtubule cytoskeleton organization                                                                         | 0000226 // microtubule cytoskeleton organization // inferred from electronic annotation///00001    |
| 92.82944                        | 209.91774            | 0.006 NM_009706///XM_0065 | <b>2.26 Arhgap5</b>                  | Rho GTPase activating protein 5                                                                               | 0002053 // positive regulation of mesenchymal cell proliferation // inferred from mutant phenot    |
| 1987.436                        | 4424.0757            | 0.002 NM_013724///XM_0065 | <b>2.23 Nrk</b>                      | Nik related kinase                                                                                            | 0006468 // protein phosphorylation // not recorded///0007256 // activation of JNKK activity // in  |
| 17.585354                       | 38.495815            | 0.000 NM_011670           | <b>2.19 Uchl1</b>                    | ubiquitin carboxy-terminal hydrolase L1                                                                       | 0002931 // response to ischemia // inferred from mutant phenotype///0006508 // proteolysis //      |
| 107.7787                        | 232.66904            | 0.007 NM_133249///XM_0065 | <b>2.16 Ppargc1b</b>                 | peroxisome proliferative activated receptor, gamma, coactivator 1 beta                                        | 0001503 // ossification // inferred from mutant phenotype///0006351 // transcription, DNA-tem      |
| 86.64082                        | 184.87636            | 0.003 NM_001159603///NM_C | <b>2.13 Pum1</b>                     | pumilio RNA-binding family member 1                                                                           | 0006417 // regulation of translation // inferred from electronic annotation                        |
| 198.3993                        | 410.63806            | 0.006 NM_001033167///XM_0 | <b>2.07 Slc22a23</b>                 | solute carrier family 22, member 23                                                                           | 0006810 // transport // inferred from electronic annotation///0006811 // ion transport // inferre  |
| 183.62709                       | 373.68777            | 0.003 NM_001081395///XM_0 | <b>2.04 Amot1</b>                    | angiomin-like 1                                                                                               | 0003365 // establishment of cell polarity involved in ameboidal cell migration // inferred from mu |
| 236.45654                       | 466.55453            | 0.002 NM_013813///XM_0065 | <b>1.97 Epb4.113</b>                 | erythrocyte protein band 4.1-like 3                                                                           | 0002175 // protein localization to paranode region of axon // inferred from mutant phenotype///    |
| 224.81752                       | 438.51678            | 0.001 NM_023598///XM_0065 | <b>1.95 Arid5b</b>                   | AT rich interactive domain 5B (MRF1-like)                                                                     | 0001822 // kidney development // inferred from mutant phenotype///0006351 // transcription, l      |
| 31.940857                       | 61.276947            | 0.006 NM_019496           | <b>1.92 Ammcr1</b>                   | Alport syndrome, mental retardation, midface hypoplasia and elliptocytosis chromosomal region gene 1          |                                                                                                    |
| 78.55106                        | 150.46126            | 0.002 NM_027707///NM_2012 | <b>1.92 Nipbl</b>                    | Nipped-B homolog (Drosophila)                                                                                 |                                                                                                    |
| 236.47023                       | 451.6383             | 0.005 NM_001033422///XM_0 | <b>1.91 Thoc2</b>                    | THO complex 2                                                                                                 |                                                                                                    |
| 150.81491                       | 284.48697            | 0.001 NM_033563///XM_0064 | <b>1.89 Klf7</b>                     | Kruppel-like factor 7 (ubiquitous)                                                                            |                                                                                                    |
| 546.5554                        | 1022.07465           | 0.001 NM_009320///XM_0065 | <b>1.87 Slc6a6</b>                   | solute carrier family 6 (neurotransmitter transporter, taurine), member 6                                     |                                                                                                    |
| 259.63635                       | 485.46533            | 0.009 NM_175229///XM_0065 | <b>1.87 Srrm2</b>                    | serine/arginine repetitive matrix 2                                                                           |                                                                                                    |
| 212.05516                       | 392.16537            | 0.002 NM_026666///XM_0065 | <b>1.85 Ubn1</b>                     | ubinnuclein 1                                                                                                 |                                                                                                    |
| 275.78058                       | 508.23175            | 0.007 NM_001166584///NM_C | <b>1.84 Tead1</b>                    | TEA domain family member 1                                                                                    |                                                                                                    |
| 466.95718                       | 856.161              | 0.000 NM_010638           | <b>1.83 Klf9</b>                     | Kruppel-like factor 9                                                                                         |                                                                                                    |
| 213.48146                       | 389.41882            | 0.001 NM_008448           | <b>1.82 Kif5b</b>                    | kinesin family member 5B                                                                                      |                                                                                                    |
| 268.03125                       | 487.97748            | 0.002 NM_00110826///NM_C  | <b>1.82 Ddx6</b>                     | DEAD (Asp-Glu-Ala-Asp) box polypeptide 6                                                                      |                                                                                                    |
| 297.5103                        | 537.5202             | 0.003 NM_009367///XM_0064 | <b>1.81 Tgfb2</b>                    | transforming growth factor, beta 2                                                                            |                                                                                                    |
| 116.7948                        | 208.21835            | 0.001 NM_010559///XM_0065 | <b>1.78 Il6ra</b>                    | interleukin 6 receptor, alpha                                                                                 |                                                                                                    |
| 325.14688                       | 579.4461             | 0.001 NM_023275           | <b>1.78 Rhoj</b>                     | Ras homolog gene family, member J                                                                             |                                                                                                    |
| 146.65102                       | 259.05176            | 0.002 NM_008306///XM_0065 | <b>1.77 Ndst1</b>                    | N-deacetylase/N-sulfotransferase (heparan glucosaminyl) 1                                                     |                                                                                                    |
| 60.01903                        | 105.209496           | 0.003 NM_177628///XM_0065 | <b>1.75 Fam167a</b>                  | family with sequence similarity 167, member A                                                                 |                                                                                                    |
| 117.15238                       | 205.0593             | 0.004 NM_001037221///NM_C | <b>1.75 Samd4</b>                    | sterile alpha motif domain containing 4                                                                       |                                                                                                    |
| 86.87219                        | 151.83783            | 0.000 NM_153542///XM_0065 | <b>1.75 Lrrc20</b>                   | leucine rich repeat containing 20                                                                             |                                                                                                    |
| 290.54257                       | 505.5732             | 0.006 NM_011595           | <b>1.74 Timp3</b>                    | tissue inhibitor of metalloproteinase 3                                                                       |                                                                                                    |
| 221.74672                       | 385.83133            | 0.003 NM_010415           | <b>1.74 Hbegf</b>                    | heparin-binding EGF-like growth factor                                                                        |                                                                                                    |
| 60.15734                        | 104.51836            | 0.003 NM_001025572///XM_0 | <b>1.74 Ankrd12</b>                  | ankyrin repeat domain 12                                                                                      |                                                                                                    |
| 445.643                         | 771.2975             | 0.007 NM_009149           | <b>1.73 Glg1</b>                     | golgi apparatus protein 1                                                                                     |                                                                                                    |
| 242.51205                       | 417.68323            | 0.001 NM_010612           | <b>1.72 Kdr</b>                      | kinase insert domain protein receptor                                                                         |                                                                                                    |
| 29.918562                       | 51.37372             | 0.001 NM_133829///NM_178C | <b>1.72 Mfsd6</b>                    | major facilitator superfamily domain containing 6                                                             |                                                                                                    |
| 153.77072                       | 263.67532            | 0.004 NM_020181///XM_0065 | <b>1.71 Fam129a</b>                  | family with sequence similarity 129, member A                                                                 |                                                                                                    |
| 138.10278                       | 236.51712            | 0.004 NM_027045///NM_0284 | <b>1.71 Ccser2</b>                   | coiled-coil serine rich 2                                                                                     |                                                                                                    |
| 148.1518                        | 253.30557            | 0.009 NM_001024955///NM_C | <b>1.71 Pik3r1</b>                   | phosphatidylinositol 3-kinase, regulatory subunit, polypeptide 1 (p85 alpha)                                  |                                                                                                    |
| 48.484287                       | 82.86876             | 0.001 NM_009179///XM_0065 | <b>1.71 St3gal2</b>                  | ST3 beta-galactoside alpha-2,3-sialyltransferase 2                                                            |                                                                                                    |
| 31.0933                         | 52.967587            | 0.002 NM_010216///XM_0065 | <b>1.70 Figf</b>                     | c-fos induced growth factor                                                                                   |                                                                                                    |
| 686.9339                        | 1166.1697            | 0.006 NM_001286944///NM_C | <b>1.70 Jund</b>                     | jun D proto-oncogene                                                                                          |                                                                                                    |
| 29.975426                       | 50.643105            | 0.002 NM_172806///XM_0065 | <b>1.69 Btdb7</b>                    | BTB (POZ) domain containing 7                                                                                 |                                                                                                    |
| 646.1344                        | 1089.8871            | 0.000 NM_001035532///NM_C | <b>1.69 Akap2</b>                    | A kinase (PRKA) anchor protein 2                                                                              |                                                                                                    |
| 163.66634                       | 275.7104             | 0.003 NM_001289895///NM_C | <b>1.68 Tns1</b>                     | tensin 1                                                                                                      |                                                                                                    |
| 55.71182                        | 93.38969             | 0.008 NM_026083///NM_0273 | <b>1.68 Zc3h13</b>                   | zinc finger CCHC type containing 13                                                                           |                                                                                                    |
| 470.6281                        | 787.2458             | 0.006 NM_175260///XM_0065 | <b>1.67 Myh10</b>                    | myosin, heavy polypeptide 10, non-muscle                                                                      |                                                                                                    |
| 74.19704                        | 123.851494           | 0.007 NM_001081345        | <b>1.67 Chd2</b>                     | chromodomain helicase DNA binding protein 2                                                                   |                                                                                                    |
| 183.03212                       | 304.75214            | 0.007 NM_173863///XM_0065 | <b>1.67 Crtc3</b>                    | CREB regulated transcription coactivator 3                                                                    |                                                                                                    |
| 258.22665                       | 429.66727            | 0.002 NM_018868///XM_0064 | <b>1.66 Naps58</b>                   | NOP58 ribonucleoprotein                                                                                       |                                                                                                    |
| 139.32092                       | 231.62354            | 0.003 NM_001085472///NM_C | <b>1.66 Acin1</b>                    | apoptotic chromatin condensation inducer 1                                                                    |                                                                                                    |
| 783.2815                        | 1300.5016            | 0.003 NM_019764///XM_0065 | <b>1.66 Amotl2</b>                   | angiomin-like 2                                                                                               |                                                                                                    |
| 123.759094                      | 205.37727            | 0.006 NM_019827///XM_0065 | <b>1.66 Gsk3b</b>                    | glycogen synthase kinase 3 beta                                                                               |                                                                                                    |
| 101.437164                      | 167.71692            | 0.006 NM_001081290///XM_0 | <b>1.65 Prrc2c</b>                   | proline-rich coiled-coil 2C                                                                                   |                                                                                                    |
| 91.79746                        | 151.67366            | 0.003 NM_175375///NM_2012 | <b>1.65 Ankhd1///Elf4ebp3///Masf</b> | ankyrin repeat and KH domain containing 1///eukaryotic translation initiation factor 4E binding protein 3///m |                                                                                                    |
| 51.99767                        | 85.33215             | 0.002 NM_001081308///NM_C | <b>1.64 Taok3</b>                    | TAO kinase 3                                                                                                  |                                                                                                    |
| 24.316162                       | 39.710747            | 0.003 NM_007731///XM_0065 | <b>1.63 Col13a1</b>                  | collagen, type XIII, alpha 1                                                                                  |                                                                                                    |
| 138.46472                       | 226.06395            | 0.001 NM_009125///XM_0065 | <b>1.63 Atxn2</b>                    | ataxin 2                                                                                                      |                                                                                                    |
| 114.34457                       | 186.64891            | 0.002 NM_172627///XM_0065 | <b>1.63 Pgg11b</b>                   | protein geranylgeranyltransferase type I, beta subunit                                                        |                                                                                                    |
| 852.8893                        | 1386.0612            | 0.007 NM_010515           | <b>1.63 Igf2r</b>                    | insulin-like growth factor 2 receptor                                                                         |                                                                                                    |
| 100.08163                       | 162.52353            | 0.000 NM_016670///NR_0274 | <b>1.62 Pknax1</b>                   | Pbx/knotted 1 homeobox                                                                                        |                                                                                                    |
| 30.79821                        | 49.81701             | 0.004 NM_009022           | <b>1.62 Aldh1a2</b>                  | aldehyde dehydrogenase family 1, subfamily A2                                                                 |                                                                                                    |
| 1311.2756                       | 2117.584             | 0.002 NM_001198949///NM_C | <b>1.61 Ralbp1</b>                   | ralA binding protein 1                                                                                        |                                                                                                    |
| 436.66263                       | 704.89874            | 0.005 NM_001286630///NM_C | <b>1.61 Brd4</b>                     | bromodomain containing 4                                                                                      |                                                                                                    |
| 85.60844                        | 137.84404            | 0.007 NM_009274///XM_0065 | <b>1.61 Sprk2</b>                    | serine/arginine-rich protein specific kinase 2                                                                |                                                                                                    |
| 128.34276                       | 206.58994            | 0.008 NM_008139           | <b>1.61 Gnaq</b>                     | guanine nucleotide binding protein, alpha q polypeptide                                                       |                                                                                                    |
| 81.630295                       | 131.2164             | 0.004 NM_001037136///NM_1 | <b>1.61 Agap1</b>                    | ArfGAP with GTPase domain, ankyrin repeat and PH domain 1                                                     |                                                                                                    |

| [Nr12-KO, PBS](i[Nr12-KO, SFN] p | RefSeq Transcript ID | FC PBS:SFN                 | Gene Symbol                                 | Gene Title                                                                                                   | Gene Ontology                                                                                       |
|----------------------------------|----------------------|----------------------------|---------------------------------------------|--------------------------------------------------------------------------------------------------------------|-----------------------------------------------------------------------------------------------------|
| 227.59846                        | 364.3591             | 0.008 NM_001122594///XM_0  | <b>1.60</b> <i>Phlpp2</i>                   | PH domain and leucine rich repeat protein phosphatase 2                                                      | 0006470 // protein dephosphorylation // not recorded///0008152 // metabolic process // inferre      |
| 46.61532                         | 74.62542             | 0.002 NM_001081342///NM_1  | <b>1.60</b> <i>Gpr133</i>                   | G protein-coupled receptor 133                                                                               | 0007166 // cell surface receptor signaling pathway // inferred from electronic annotation///0007    |
| 175.33382                        | 280.0718             | 0.010 NM_008608            | <b>1.60</b> <i>Mmp14</i>                    | matrix metalloproteinase 14 (membrane-inserted)                                                              | 0001503 // ossification // inferred from genetic interaction///0001525 // angiogenesis // inferrec  |
| 169.87717                        | 270.61682            | 0.009 NM_001252313///NM_C  | <b>1.59</b> <i>Ncor1</i>                    | nuclear receptor co-repressor 1                                                                              | 0000122 // negative regulation of transcription from RNA polymerase II promoter // inferred from    |
| 112.20864                        | 178.59636            | 0.004 NM_001256019///NM_C  | <b>1.59</b> <i>Bmp8a</i>                    | bone morphogenetic protein 8a                                                                                | 0001503 // ossification // inferred from electronic annotation///0001649 // osteoblast differenti   |
| 76.61679                         | 121.892235           | 0.002 NM_145469///XM_0065  | <b>1.59</b> <i>Nipal2</i>                   | NIPA-like domain containing 2                                                                                | 0015693 // magnesium ion transport // inferred from electronic annotation                           |
| 139.39969                        | 221.6585             | 0.002 NM_001127382///NM_C  | <b>1.59</b> <i>Rbm47</i>                    | RNA binding motif protein 47                                                                                 | 0002244 // hematopoietic progenitor cell differentiation // inferred from mutant phenotype          |
| 154.64069                        | 245.34033            | 0.009 NM_001122989///NM_1  | <b>1.59</b> <i>Cdc14b</i>                   | CDC14 cell division cycle 14B                                                                                | 0006281 // DNA repair // inferred from electronic annotation///0006470 // protein dephosphory       |
| 267.5616                         | 424.32977            | 0.005 NM_183186///XM_0065  | <b>1.59</b> <i>Foxn3</i>                    | forkhead box N3                                                                                              | 0006351 // transcription, DNA-templated // inferred from electronic annotation///0006355 // reg     |
| 50.520676                        | 80.09842             | 0.004 NM_019588///XM_0065  | <b>1.59</b> <i>Plce1</i>                    | phospholipase C, epsilon 1                                                                                   | 0000187 // activation of MAPK activity // not recorded///0006629 // lipid metabolic process // in   |
| 919.9455                         | 1456.9144            | 0.010 NM_139149///XM_0065  | <b>1.58</b> <i>Fus</i>                      | fused in sarcoma                                                                                             | 0000166 // nucleotide binding // inferred from electronic annotation///0003676 // nucleic acid b    |
| 157.5852                         | 249.31615            | 0.002 NM_138593            | <b>1.58</b> <i>Larp7</i>                    | La ribonucleoprotein domain family, member 7                                                                 | 0000122 // negative regulation of transcription from RNA polymerase II promoter // inferred from    |
| 33.56851                         | 52.969547            | 0.002 NM_001081267         | <b>1.58</b> <i>Rsf1</i>                     | remodeling and spacing factor 1                                                                              | 0006334 // nucleosome assembly // not recorded///0006338 // chromatin remodeling // not rec         |
| 214.85323                        | 338.34213            | 0.004 NM_029735///XM_0064  | <b>1.57</b> <i>Eprs</i>                     | glutamyl-prolyl-tRNA synthetase                                                                              | 0006412 // translation // inferred from electronic annotation///0006417 // regulation of transl     |
| 52.963245                        | 83.01658             | 0.003 NM_133187///XM_0065  | <b>1.57</b> <i>Fam198b</i>                  | family with sequence similarity 198, member B                                                                | 0000139 // Golgi membrane // inferred from electronic annotation///0005794 // Golgi apparatus       |
| 302.86575                        | 473.274              | 0.006 NM_030886///NM_198C  | <b>1.56</b> <i>Ankrd17</i>                  | ankyrin repeat domain 17                                                                                     | 0001955 // blood vessel maturation // inferred from mutant phenotype///0007492 // endoderm          |
| 1870.5076                        | 2920.1187            | 0.005 NM_001093764///NM_C  | <b>1.56</b> <i>Myadm</i>                    | myeloid-associated differentiation marker                                                                    | 0001933 // negative regulation of protein phosphorylation // not recorded///0010629 // negativ      |
| 223.12712                        | 347.63193            | 0.005 NM_001081203///XM_0  | <b>1.56</b> <i>Sbno1</i>                    | sno, strawberry notch homolog 1 (Drosophila)                                                                 | 0006355 // regulation of transcription, DNA-templated // inferred from electronic annotation///C    |
| 72.766525                        | 113.172195           | 0.001 NM_001109975///NM_1  | <b>1.56</b> <i>Synpo</i>                    | synaptopodin                                                                                                 | 0030865 // cortical cytoskeleton organization // non-traceable author statement///0032233 // pr     |
| 386.83777                        | 601.2774             | 0.002 NM_001113545///NM_C  | <b>1.55</b> <i>Lima1</i>                    | LIM domain and actin binding 1                                                                               | 0030835 // negative regulation of actin filament depolymerization // not recorded///0031529 //      |
| 373.1615                         | 578.8367             | 0.001 NM_001136240///NM_1  | <b>1.55</b> <i>Chdh</i>                     | choline dehydrogenase                                                                                        | 0006066 // alcohol metabolic process // inferred from electronic annotation///0016117 // carote     |
| 204.4373                         | 316.90594            | 0.003 NM_001205173///NM_1  | <b>1.55</b> <i>Ifjo2</i>                    | intermediate filament family orphan 2                                                                        | 0005198 // structural molecule activity // inferred from electronic annotation                      |
| 807.49396                        | 1251.062             | 0.004 NM_010890            | <b>1.55</b> <i>Nedd4</i>                    | neural precursor cell expressed, developmentally down-regulated 4                                            | 0000122 // negative regulation of transcription from RNA polymerase II promoter // inferred from    |
| 343.139                          | 531.0809             | 0.004 NM_010560            | <b>1.55</b> <i>Il6st</i>                    | interleukin 6 signal transducer                                                                              | 0005977 // glycogen metabolic process // inferred from mutant phenotype///0006642 // triglyce       |
| 268.3768                         | 415.23944            | 0.010 NM_009621            | <b>1.55</b> <i>Adamts1</i>                  | a disintegrin-like and metalloproteinase (reprolysin type) with thrombospondin type 1 motif, 1               | 0001542 // ovulation from ovarian follicle // inferred from mutant phenotype///0001822 // kidn      |
| 150.48409                        | 232.54872            | 0.005 NM_001197321///NM_C  | <b>1.55</b> <i>Foxp1</i>                    | forkhead box P1                                                                                              | 0000122 // negative regulation of transcription from RNA polymerase II promoter // inferred from    |
| 219.75166                        | 338.68494            | 0.001 NM_001252282///NM_C  | <b>1.54</b> <i>Ogdh</i>                     | oxoglutarate (alpha-ketoglutarate) dehydrogenase (lipoamide)                                                 | 0006091 // generation of precursor metabolites and energy // inferred from sequence or structu      |
| 61.148697                        | 94.17461             | 0.009 NM_001081477///XM_0  | <b>1.54</b> <i>Brwd3</i>                    | bromodomain and WD repeat domain containing 3                                                                | 0007010 // cytoskeleton organization // not recorded///0008360 // regulation of cell shape // no    |
| 2680.0466                        | 4123.3755            | 0.002 NM_008302            | <b>1.54</b> <i>Hsp90aab1</i>                | heat shock protein 90 alpha (cytosolic), class B member 1                                                    | 0001890 // placenta development // inferred from mutant phenotype///0006457 // protein fold         |
| 119.55461                        | 183.71754            | 0.003 NM_010124            | <b>1.54</b> <i>Eif4ebp2</i>                 | eukaryotic translation initiation factor 4E binding protein 2                                                | 0006417 // regulation of translation // inferred from electronic annotation///0006446 // regulati   |
| 520.86615                        | 798.30365            | 0.007 NM_001291212///NM_C  | <b>1.53</b> <i>Myo18a</i>                   | myosin XVIIIa                                                                                                | 0007030 // Golgi organization // not recorded///0008152 // metabolic process // inferred from e     |
| 52.324303                        | 79.931274            | 0.007 NM_008449            | <b>1.53</b> <i>Kif5c</i>                    | kinesin family member 5C                                                                                     | 0006355 // regulation of transcription, DNA-templated // inferred from electronic annotation///C    |
| 37.96012                         | 57.955303            | 0.006 NM_145430///XM_0065  | <b>1.53</b> <i>Fam222b</i>                  | family with sequence similarity 222, member B                                                                |                                                                                                     |
| 156.09846                        | 238.06563            | 0.007 NM_138657///XM_0065  | <b>1.53</b> <i>Socs7</i>                    | suppressor of cytokine signaling 7                                                                           | 0008286 // insulin receptor signaling pathway // inferred from mutant phenotype///0009968 // r      |
| 828.1501                         | 1261.3615            | 0.009 NM_010123            | <b>1.52</b> <i>Eif3a</i>                    | eukaryotic translation initiation factor 3, subunit A                                                        | 0001731 // formation of translation preinitiation complex // inferred from electronic annotation/   |
| 178.14966                        | 270.939              | 0.006 NM_011213///XM_0065  | <b>1.52</b> <i>Ptirf</i>                    | protein tyrosine phosphatase, receptor type, F                                                               | 0001960 // negative regulation of cytokine-mediated signaling pathway // not recorded///00064       |
| 476.58768                        | 722.8335             | 0.003 NM_001081251///NM_C  | <b>1.52</b> <i>Pbrm1</i>                    | polybromo 1                                                                                                  | 0001890 // placenta development // inferred from mutant phenotype///0001974 // blood vessel         |
| 201.07                           | 304.79947            | 0.008 NM_001161362///NM_1  | <b>1.52</b> <i>Ppp2r3a</i>                  | protein phosphatase 2, regulatory subunit B'', alpha                                                         | 0001754 // eye photoreceptor cell differentiation // not recorded///0007525 // somatic muscle c     |
| 187.8261                         | 284.68112            | 0.005 NM_198303///XM_0064  | <b>1.52</b> <i>Eif5b</i>                    | eukaryotic translation initiation factor 5B                                                                  | 0006184 // GTP catabolic process // inferred from electronic annotation///0006412 // translation    |
| 76.257645                        | 115.54268            | 0.001 NM_001081350///NM_C  | <b>1.52</b> <i>Nol8</i>                     | nucleolar protein 8                                                                                          | 0006260 // DNA replication // not recorded///0006364 // rRNA processing // not recorded///003       |
| 103.30395                        | 155.71524            | 0.007 NM_018785///XM_0064  | <b>1.51</b> <i>Prpf40a</i>                  | PRP40 pre-mRNA processing factor 40 homolog A (yeast)                                                        | 0006397 // mRNA processing // inferred from electronic annotation///0007010 // cytoskeleton o       |
| 135.39261                        | 203.5406             | 0.002 NM_011894///XM_0065  | <b>1.50</b> <i>Sh3bp5</i>                   | SH3-domain binding protein 5 (BTK-associated)                                                                | 0006469 // negative regulation of protein kinase activity // inferred from direct assay///0006469   |
| 402.42963                        | 604.7821             | 0.009 NM_024452///XM_0065  | <b>1.50</b> <i>Luzp1</i>                    | leucine zipper protein 1                                                                                     | 0003281 // ventricular septum development // inferred from mutant phenotype///0021503 // ne         |
| 228.43387                        | 152.31956            | 0.007 NM_030731///XM_0065  | <b>-1.50</b> <i>Trim23</i>                  | tripartite motif-containing 23                                                                               | 0006184 // GTP catabolic process // not recorded///0006471 // protein ADP-ribosylation // not r     |
| 712.6971                         | 474.83206            | 0.006 NM_001110159///NM_C  | <b>-1.50</b> <i>Nxt1</i>                    | NTF2-related export protein 1                                                                                | 0006405 // RNA export from nucleus // inferred from direct assay///0006611 // protein export fr     |
| 1723.9908                        | 1145.6034            | 0.004 NM_001039368///NM_C  | <b>-1.50</b> <i>LOC100862456///Polr2k</i>   | DNA-directed RNA polymerases I, II, and III subunit RPABCA4-like///polymerase (RNA) II (DNA directed) polype | 0006351 // transcription, DNA-templated // inferred from electronic annotation///0006360 // tra     |
| 171.257                          | 113.783104           | 0.006 NM_001253685///NM_C  | <b>-1.51</b> <i>Dnajc12</i>                 | DnaJ (Hsp40) homolog, subfamily C, member 12                                                                 |                                                                                                     |
| 74.34266                         | 49.38743             | 0.001 NM_029942            | <b>-1.51</b> <i>Prelid2</i>                 | PRELI domain containing 2                                                                                    | 0015914 // phospholipid transport // not recorded                                                   |
| 30.163132                        | 19.97883             | 0.001 NM_001080967///NM_2  | <b>-1.51</b> <i>Tmsb15b2///Tmsb15l///Tn</i> | thymosin beta 15b2///thymosin beta 15b like///thymosin beta 15b1                                             | 0007010 // cytoskeleton organization // inferred from electronic annotation///0030036 // actin c    |
| 1187.7072                        | 784.6771             | 0.003 NM_016905            | <b>-1.51</b> <i>Galk1</i>                   | galactokinase 1                                                                                              | 0005975 // carbohydrate metabolic process // inferred from electronic annotation///0006012 //       |
| 603.0483                         | 397.4583             | 0.007 NR_024069            | <b>-1.52</b> <i>Smin4</i>                   | small integral membrane protein 4                                                                            | 0005739 // mitochondrion // inferred from direct assay///0016020 // membrane // inferred from       |
| 368.23785                        | 242.32144            | 0.005 NM_001256100///NM_C  | <b>-1.52</b> <i>Mtlf3</i>                   | mitochondrial translational initiation factor 3                                                              | 0001732 // formation of translation initiation complex // not recorded///0006412 // translation /   |
| 6832.678                         | 4477.093             | 0.000 NM_139198            | <b>-1.53</b> <i>Plac8</i>                   | placenta-specific 8                                                                                          | 0008284 // positive regulation of cell proliferation // inferred from direct assay///0009409 // res |
| 291.448                          | 190.22641            | 0.007 NM_183275///XM_0065  | <b>-1.53</b> <i>Tefm</i>                    | transcription elongation factor, mitochondrial                                                               | 0006119 // oxidative phosphorylation // not recorded///0006259 // DNA metabolic process // nc       |
| 502.25217                        | 324.984              | 0.003 NM_007705///XM_0065  | <b>-1.55</b> <i>Cirbp</i>                   | cold inducible RNA binding protein                                                                           | 0006950 // response to stress // inferred from electronic annotation///0009409 // response to c     |
| 415.6489                         | 263.10162            | 0.008 NM_008776            | <b>-1.58</b> <i>Pafah1b3</i>                | platelet-activating factor acetylhydrolase, isoform 1b, subunit 3                                            | 0006629 // lipid metabolic process // inferred from electronic annotation///0007283 // spermat      |
| 291.0483                         | 183.60161            | 0.010 NM_027264///XM_0065  | <b>-1.59</b> <i>Zfp715</i>                  | zinc finger protein 715                                                                                      | 0006355 // regulation of transcription, DNA-templated // inferred from electronic annotation        |
| 366.44653                        | 230.66063            | 0.008 NR_029382///NR_02981 | <b>-1.59</b> <i>Mir17hg///Mir92-1</i>       | Mir17 host gene 1 (non-protein coding)///microRNA 92-1                                                       | 0001701 // in utero embryonic development // inferred from genetic interaction///0002329 // pr      |
| 115.03816                        | 72.38381             | 0.000 NM_001113401///NM_C  | <b>-1.59</b> <i>Eaf2</i>                    | ELL associated factor 2                                                                                      | 0006351 // transcription, DNA-templated // inferred from electronic annotation///0006355 // reg     |
| 26.701725                        | 16.769487            | 0.004 NM_001136059///NM_C  | <b>-1.59</b> <i>Cyp1a1</i>                  | cytochrome P450, family 1, subfamily a, polypeptide 1                                                        | 0001666 // response to hypoxia // inferred from electronic annotation///0001889 // liver develo     |
| 62.30257                         | 38.85401             | 0.001 NM_178417            | <b>-1.60</b> <i>Zfp867</i>                  | zinc finger protein 867                                                                                      | 0006355 // regulation of transcription, DNA-templated // inferred from electronic annotation        |
| 7075.0547                        | 4396.1826            | 0.004 NM_009760            | <b>-1.61</b> <i>Bnip3</i>                   | BCL2/adenovirus E1B interacting protein 3                                                                    | 0001666 // response to hypoxia // not recorded///0006309 // apoptotic DNA fragmentation // in       |
| 18.792166                        | 11.65461             | 0.001 NM_027054            | <b>-1.61</b> <i>Cst12</i>                   | cystatin 12                                                                                                  | 0010466 // negative regulation of peptidase activity // inferred from electronic annotation///001   |
| 30.946371                        | 19.152197            | 0.010 NM_007749            | <b>-1.62</b> <i>Cox7c</i>                   | cytochrome c oxidase subunit VIIc                                                                            | 1902600 // hydrogen ion transmembrane transport // inferred from electronic annotation              |
| 541.4956                         | 334.2564             | 0.009 NM_001039562///XM_0  | <b>-1.62</b> <i>Ankrd37</i>                 | ankyrin repeat domain 37                                                                                     | 0005515 // protein binding // inferred from physical interaction                                    |
| 219.12213                        | 134.98166            | 0.007 NM_011943///XM_0065  | <b>-1.62</b> <i>Map2k6</i>                  | mitogen-activated protein kinase kinase 6                                                                    | 0000165 // MAPK cascade // not recorded///0000165 // MAPK cascade // inferred from physical         |
| 252.87946                        | 156.57854            | 0.001 NM_009944            | <b>-1.62</b> <i>Cox7a1</i>                  | cytochrome c oxidase subunit VIIa 1                                                                          | 0055114 // oxidation-reduction process // inferred from sequence or structural similarity///1902    |
| 337.33157                        | 207.07092            | 0.001 NM_175016///XM_0065  | <b>-1.63</b> <i>Alkbh2</i>                  | alkB, alkylaldehyde repair homolog 2 (E. coli)                                                               | 0006281 // DNA repair // inferred from electronic annotation///0006307 // DNA dealkylation inv      |
| 66.03724                         | 40.408676            | 0.004 NM_001285853///NM_C  | <b>-1.63</b> <i>Matk</i>                    | megakaryocyte-associated tyrosine kinase                                                                     | 0006468 // protein phosphorylation // inferred from electronic annotation///0016310 // phosph       |
| 153.09377                        | 93.59858             | 0.003 NM_146159            | <b>-1.64</b> <i>Haus3</i>                   | HAUS augmin-like complex, subunit 3                                                                          | 0006260 // DNA replication // inferred from electronic annotation///0006261 // DNA-dependent        |
| 289.38388                        | 175.44807            | 0.002 NM_018827///XM_0065  | <b>-1.65</b> <i>Cr1f1</i>                   | cytokine receptor-like factor 1                                                                              | 0001657 // ureteric bud development // inferred from expression pattern///0008284 // positive       |



| [Nrf2-KO, PBS] | [Nrf2-KO, SFN] | p     | RefSeq Transcript ID | FC PBS:SFN | Gene Symbol                     | Gene Title                                                                                         | Gene Ontology                                                                                       |
|----------------|----------------|-------|----------------------|------------|---------------------------------|----------------------------------------------------------------------------------------------------|-----------------------------------------------------------------------------------------------------|
| 942.3501       | 557.65533      | 0.004 | NM_026080///XM_0065  | -1.69      | <b>Mrps24</b>                   | mitochondrial ribosomal protein S24                                                                | 0006412 // translation // inferred from sequence or structural similarity                           |
| 105.44037      | 60.948776      | 0.008 | NM_001271729///NM_C  | -1.73      | <b>Tk1</b>                      | thymidine kinase 1                                                                                 | 0001889 // liver development // inferred from electronic annotation///0006260 // DNA replicat       |
| 428.62814      | 240.13652      | 0.001 | NM_027106///XM_0065  | -1.78      | <b>Avp1</b>                     | arginine vasopressin-induced 1                                                                     | 0000187 // activation of MAPK activity // inferred from direct assay///0007049 // cell cycle // inf |
| 632.86444      | 351.0533       | 0.006 | NM_001005223///XM_0  | -1.80      | <b>Znhit3</b>                   | zinc finger, HIT type 3                                                                            | 0046872 // metal ion binding // inferred from electronic annotation                                 |
| 67.62999       | 37.116673      | 0.001 | NM_026358///NR_0281  | -1.82      | <b>Mgarp</b>                    | mitochondria localized glutamic acid rich protein                                                  | 0006626 // protein targeting to mitochondrion // inferred from direct assay///0008089 // antero     |
| 129.81496      | 68.594696      | 0.003 | NM_001109914         | -1.89      | <b>Apold1</b>                   | apolipoprotein L domain containing 1                                                               | 0001525 // angiogenesis // inferred from electronic annotation///0001666 // response to hypoxi      |
| 267.1691       | 136.2508       | 0.004 | NM_001037134///NM_C  | -1.96      | <b>Ccne2</b>                    | cyclin E2                                                                                          | 0000079 // regulation of cyclin-dependent protein serine/threonine kinase activity // inferred fro  |
| 711.34247      | 361.6959       | 0.002 | NM_030093            | -1.97      | <b>Snrnp25</b>                  | small nuclear ribonucleoprotein 25 (U11/U12)                                                       | 0006397 // mRNA processing // inferred from electronic annotation///0008380 // RNA splicing //      |
| 73.92938       | 35.603764      | 0.005 | NM_173869            | -2.08      | <b>Stfa2l1</b>                  | stefin A2 like 1                                                                                   | 0010951 // negative regulation of endopeptidase activity // inferred from electronic annotation     |
| 53.3571        | 25.288898      | 0.001 | NM_001289727///NM_C  | -2.11      | <b>Tmem255a</b>                 | transmembrane protein 255A                                                                         | 0016020 // membrane // inferred from electronic annotation//0016021 // integral component c         |
| 190.04109      | 88.3881        | 0.000 | NM_025748///XM_0065  | -2.15      | <b>Adat2</b>                    | adenosine deaminase, tRNA-specific 2                                                               | 0002100 // tRNA wobble adenosine to inosine editing // inferred from electronic annotation//00      |
| 202.0172       | 91.759605      | 0.002 | NM_025491///NM_0283  | -2.20      | <b>Susd3</b>                    | sushi domain containing 3                                                                          | 0016020 // membrane // inferred from electronic annotation//0016021 // integral component c         |
| 49.01388       | 16.211506      | 0.006 | XM_006528434///XM_0  | -3.02      | <b>Astx///Astx6///LOC102631</b> | amplified spermatogenic transcripts X encoded///amplified spermatogenic transcripts X encoded 6/// | uncharacterized LOC102631953///uncharacterized LOC102640642                                         |
| 48.069675      | 15.348848      | 0.004 | NM_009484///XM_0065  | -3.13      | <b>Uty</b>                      | ubiquitously transcribed tetratricopeptide repeat gene, Y chromosome                               | 0001701 // in utero embryonic development // inferred from mutant phenotype///0003007 // h          |
